# Supplementary material for: An empirical model for solvation based on surface site interaction points
Source: Chem Sci. 2021 Sep 16;12(39):13193–208. doi: 10.1039/d1sc03392a (PMC8513935; doi:10.1039/d1sc03392a)
Supplement: SC-012-D1SC03392A-s002 [file SC-012-D1SC03392A-s002.xlsx]

## Sheet: 1 Training set expt. v calc.
	Solvent	No. of data points	rmsd
	Hexadecane	219	1.22808
	Hexane	87	1.23748
	Cyclohexane	51	1.22816
	Diethyl Ether	25	1.23158
	CCl4	86	1.1398
	Dichloromethane	28	1.2828
	Trichloromethane	71	1.58876
	Di-n-butyl ether	35	1.69075
	Acetonitrile	24	2.07573
	Benzene	37	1.15917
	Propionitrile	21	1.59312
	Butyronitrile	31	1.29504
	Tetrahydrofuran	49	1.91689
	1,2-Dichloroethane	58	1.47849
	Chlorobenzene	57	1.25871
	Propanone	46	1.49638
	Butanone	42	1.4736
	Cyclohexanone	30	1.32178
	Methanol	64	2.02431
	Ethanol	44	1.50624
	Propan-1-ol	48	1.29542
	Butan-1-ol	57	1.41242
	Pentan-1-ol	44	1.20635
	Hexan-1-ol	30	1.27227
	Heptan-1-ol	21	1.26276
	Octan-1-ol	74	1.65607
	Decan-1-ol	27	1.29462
	Propan-2-ol	62	1.52567
	Butan-2-ol	29	1.44233
	2-Methylpropan-1-ol	38	1.20411
	2-Methylpropan-2-ol	44	1.54031
	3-Methylbutan-1-ol	22	1.13696
	Toluene	34	1.06483
	Cyclohexane	51	1.22816
	Perfluorohexane	27	1.85106
		n Total	Overall rmsd
		1713	1.42302
			n	rmsd		n	rmsd		n	rmsd		n	rmsd		n	rmsd		n	rmsd		n	rmsd		n	rmsd		n	rmsd		n	rmsd		n	rmsd		n	rmsd		n	rmsd		n	rmsd		n	rmsd		n	rmsd
			189	1.57277		219	1.22808		25	1.23158		86	1.1398		28	1.2828		71	1.58876		35	1.69075		24	2.07573		37	1.15917		21	1.59312		31	1.29504		49	1.91689		58	1.47849		57	1.25871		46	1.49638		42	1.4736
		Expt.			Expt.			Expt.			Expt.		0	Expt.		0	Expt.		0	Expt.		0	Expt.		0	Expt.		0	Expt.		0	Expt.		0	Expt.		0	Expt.		0	Expt.		0	Expt.		0	Expt.		0
Solute name	SMILES	Water-> octanol (wet)	Calculated	Diff^2	Water-> Hexadecane	Calculated	Diff^2	Water-> Diethyl Ether	Calculated	Diff^2	Water-> CCl4	Calculated	Diff^2	Water-> Dichloromethane	Calculated	Diff^2	Water-> CHCl3	Calculated	Diff^2	Water-> Di-n-butyl ether	Calculated	Diff^2	Water-> Acetonitrile	Calculated	Diff^2	Water-> Benzene	Calculated	Diff^2	Water-> Propionitrile	Calculated	Diff^2	Water-> Butyronitrile	Calculated	Diff^2	Water-> Tetrahydrofuran	Calculated	Diff^2	Water-> 1,2-Dichloroethane	Calculated	Diff^2	Water-> Chlorobenzene	Calculated	Diff^2	Water-> Propanone	Calculated	Diff^2	Water-> Butanone	Calculated	Diff^2
n-pentane	CCCCC	19.3404	19.9898	0.42171	22.0561	21.601	0.207103	#N/A	23.05	0	23.1857	22.941	0.0598794	22.5011	22.7935	0.0855009	23.1857	22.1487	1.07534	23.0145	23.05	0.00125695	18.4504	20.1476	2.88027	22.2158	22.8806	0.441939	#N/A	20.1476	0	20.6754	20.1476	0.278643	23.0145	23.05	0.00125695	21.0748	21.804	0.531716	23.585	23.2925	0.0856063	21.0177	20.8485	0.0286463	21.5312	20.8485	0.466099
n-hexane	CCCCCC	22.25	23.2913	1.08425	25.6104	25.2011	0.167464	#N/A	26.5145	0	27.3904	26.5411	0.721185	26.0782	26.3038	0.0509132	26.7628	25.7401	1.04583	26.4775	26.5145	0.00136225	21.5711	22.9145	1.80477	25.5077	26.694	1.40743	23.0545	22.9145	0.0195774	23.7391	22.9145	0.679859	26.5916	26.5145	0.00595892	24.7089	25.116	0.165685	27.2192	26.9279	0.0848845	23.9102	24.0082	0.00960033	24.766	24.0082	0.574245
n-heptane	CCCCCCC	25.6731	26.5928	0.845838	29.2902	28.8013	0.238998	#N/A	29.9789	0	31.0417	30.1413	0.810633	29.8436	29.8142	0.000864122	30.5282	29.3316	1.43185	30.4711	29.9789	0.242274	24.5948	25.6815	1.18088	#N/A	30.5075	0	26.4205	25.6815	0.546063	27.2763	25.6815	2.54317	30.2429	29.9789	0.0697004	28.1891	28.428	0.0570914	30.9846	30.5633	0.17752	27.2192	27.168	0.00262761	28.4743	27.168	1.70666
n-octane	CCCCCCCC	29.3815	29.8943	0.263022	33.0099	32.4015	0.370225	34.3963	33.4434	0.90797	35.1379	33.7415	1.95015	33.2552	33.3245	0.00480071	34.2822	32.923	1.84724	33.9969	33.4434	0.306379	27.3219	28.4485	1.26927	34.3963	34.3209	0.00568334	29.4328	28.4485	0.968815	30.3456	28.4485	3.59901	33.9969	33.4434	0.306379	31.6578	31.74	0.00676378	34.7956	34.1987	0.356355	30.4597	30.3277	0.0174346	31.7149	30.3277	1.92424
n-nonane	CCCCCCCCC	32.234	33.1958	0.92504	36.1249	36.0016	0.0152038	#N/A	36.9079	0	38.2244	37.3416	0.779326	36.2847	36.8349	0.302736	37.4828	36.5145	0.93754	#N/A	36.9079	0	29.3815	31.2155	3.36375	#N/A	38.1343	0	31.7776	31.2155	0.315963	32.9757	31.2155	3.09825	37.0263	36.9079	0.014035	34.459	35.0521	0.351705	38.0533	37.8341	0.0480395	33.1468	33.4874	0.115994	34.5161	33.4874	1.05813
n-decane	CCCCCCCCCC	33.5462	36.4973	8.70905	39.9702	39.6018	0.135721	#N/A	40.3723	0	#N/A	40.9418	0	#N/A	40.3452	0	#N/A	40.1059	0	#N/A	40.3723	0	#N/A	33.9825	0	#N/A	41.9477	0	#N/A	33.9825	0	#N/A	33.9825	0	#N/A	40.3723	0	#N/A	38.3641	0	#N/A	41.4695	0	#N/A	36.6472	0	38.4526	36.6472	3.25969
isopentane	CCC(C)C	18.1994	19.9898	3.2056	21.4684	21.601	0.0175678	#N/A	23.05	0	#N/A	22.941	0	#N/A	22.7935	0	#N/A	22.1487	0	#N/A	23.05	0	#N/A	20.1476	0	#N/A	22.8806	0	#N/A	20.1476	0	#N/A	20.1476	0	#N/A	23.05	0	#N/A	21.804	0	#N/A	23.2925	0	#N/A	20.8485	0	#N/A	20.8485	0
2-methylpentane	CCCC(C)C	21.2802	23.2913	4.04472	24.7774	25.2011	0.179544	#N/A	26.5145	0	26.5289	26.5411	0.000150048	25.2738	26.3038	1.06103	25.9584	25.7401	0.0476264	#N/A	26.5145	0	20.8808	22.9145	4.13609	#N/A	26.694	0	22.3641	22.9145	0.302943	23.1058	22.9145	0.0365826	25.9013	26.5145	0.375925	23.8475	25.116	1.60914	26.3577	26.9279	0.325044	23.277	24.0082	0.534729	24.1327	24.0082	0.015505
3-methylpentane	CCC(C)CC	20.5385	23.2913	7.578	25.2224	25.2011	0.000452589	#N/A	26.5145	0	#N/A	26.5411	0	#N/A	26.3038	0	#N/A	25.7401	0	#N/A	26.5145	0	#N/A	22.9145	0	#N/A	26.694	0	#N/A	22.9145	0	#N/A	22.9145	0	#N/A	26.5145	0	#N/A	25.116	0	#N/A	26.9279	0	#N/A	24.0082	0	#N/A	24.0082	0
3-methylhexane	CCCC(C)CC	24.3039	26.5928	5.23918	28.7197	28.8013	0.00666497	#N/A	29.9789	0	#N/A	30.1413	0	#N/A	29.8142	0	#N/A	29.3316	0	#N/A	29.9789	0	#N/A	25.6815	0	#N/A	30.5075	0	#N/A	25.6815	0	#N/A	25.6815	0	#N/A	29.9789	0	#N/A	28.428	0	#N/A	30.5633	0	#N/A	27.168	0	#N/A	27.168	0
2,2-dimethylpentane	CCCC(C)(C)C	24.3039	26.5928	5.23918	27.9894	28.8013	0.659176	#N/A	29.9789	0	#N/A	30.1413	0	#N/A	29.8142	0	#N/A	29.3316	0	#N/A	29.9789	0	#N/A	25.6815	0	#N/A	30.5075	0	#N/A	25.6815	0	#N/A	25.6815	0	#N/A	29.9789	0	#N/A	28.428	0	#N/A	30.5633	0	#N/A	27.168	0	#N/A	27.168	0
3-methylheptane	CCCCC(C)CC	27.3847	29.8943	6.29836	32.4622	32.4015	0.00369278	#N/A	33.4434	0	#N/A	33.7415	0	#N/A	33.3245	0	#N/A	32.923	0	#N/A	33.4434	0	#N/A	28.4485	0	#N/A	34.3209	0	#N/A	28.4485	0	#N/A	28.4485	0	#N/A	33.4434	0	#N/A	31.74	0	#N/A	34.1987	0	#N/A	30.3277	0	#N/A	30.3277	0
2,5-dimethylhexane	CC(C)CCC(C)C	27.3847	29.8943	6.29836	30.397	32.4015	4.01799	#N/A	33.4434	0	32.4052	33.7415	1.78565	30.9218	33.3245	5.77291	31.8347	32.923	1.18455	#N/A	33.4434	0	25.1597	28.4485	10.8166	#N/A	34.3209	0	27.2706	28.4485	1.3876	28.1834	28.4485	0.0702999	31.6635	33.4434	3.16799	29.2103	31.74	6.39962	32.2911	34.1987	3.63894	28.3545	30.3277	3.89334	29.4385	30.3277	0.79064
2,2,4-trimethylpentane	CC(C)CC(C)(C)C	27.3847	29.8943	6.29836	29.815	32.4015	6.68954	#N/A	33.4434	0	#N/A	33.7415	0	#N/A	33.3245	0	#N/A	32.923	0	#N/A	33.4434	0	#N/A	28.4485	0	#N/A	34.3209	0	#N/A	28.4485	0	#N/A	28.4485	0	31.5494	33.4434	3.58719	#N/A	31.74	0	#N/A	34.1987	0	#N/A	30.3277	0	29.0391	30.3277	1.66033
2,3,4-trimethylpentane	CC(C)C(C)C(C)C	27.3847	29.8943	6.29836	30.5852	32.4015	3.29866	#N/A	33.4434	0	31.9488	33.7415	3.21375	30.5225	33.3245	7.85147	31.4353	32.923	2.21334	#N/A	33.4434	0	25.0456	28.4485	11.5802	#N/A	34.3209	0	26.8712	28.4485	2.48795	27.8981	28.4485	0.302938	31.2071	33.4434	5.00102	28.925	31.74	7.92424	31.7776	34.1987	5.86155	28.0122	30.3277	5.36137	29.0962	30.3277	1.51656
2-methyloctane	CCCCCCC(C)C	#N/A	33.1958	0	34.8926	36.0016	1.22989	#N/A	36.9079	0	#N/A	37.3416	0	#N/A	36.8349	0	#N/A	36.5145	0	#N/A	36.9079	0	#N/A	31.2155	0	#N/A	38.1343	0	#N/A	31.2155	0	#N/A	31.2155	0	#N/A	36.9079	0	#N/A	35.0521	0	#N/A	37.8341	0	#N/A	33.4874	0	#N/A	33.4874	0
2,2,5-trimethylhexane	CC(C)CCC(C)(C)C	30.4654	33.1958	7.45499	32.6163	36.0016	11.4606	#N/A	36.9079	0	#N/A	37.3416	0	#N/A	36.8349	0	#N/A	36.5145	0	#N/A	36.9079	0	#N/A	31.2155	0	#N/A	38.1343	0	#N/A	31.2155	0	#N/A	31.2155	0	#N/A	36.9079	0	#N/A	35.0521	0	#N/A	37.8341	0	#N/A	33.4874	0	#N/A	33.4874	0
3,3-diethylpentane	CCC(CC)(CC)CC	29.6097	33.1958	12.8605	32.1947	36.0016	14.4926	#N/A	36.9079	0	#N/A	37.3416	0	#N/A	36.8349	0	#N/A	36.5145	0	#N/A	36.9079	0	#N/A	31.2155	0	#N/A	38.1343	0	#N/A	31.2155	0	#N/A	31.2155	0	#N/A	36.9079	0	#N/A	35.0521	0	#N/A	37.8341	0	#N/A	33.4874	0	#N/A	33.4874	0
2-methylnonane	CCCCCCCC(C)C	#N/A	36.4973	0	38.3556	39.6018	1.55289	#N/A	40.3723	0	#N/A	40.9418	0	#N/A	40.3452	0	#N/A	40.1059	0	#N/A	40.3723	0	#N/A	33.9825	0	#N/A	41.9477	0	#N/A	33.9825	0	#N/A	33.9825	0	#N/A	40.3723	0	#N/A	38.3641	0	#N/A	41.4695	0	#N/A	36.6472	0	#N/A	36.6472	0
cyclopentane	C1CCCC1	17.1154	16.6883	0.18242	19.1521	18.0008	1.32557	#N/A	19.5855	0	#N/A	19.3408	0	#N/A	19.2831	0	#N/A	18.5572	0	#N/A	19.5855	0	#N/A	17.3806	0	#N/A	19.0672	0	#N/A	17.3806	0	#N/A	17.3806	0	#N/A	19.5855	0	#N/A	18.4919	0	#N/A	19.657	0	#N/A	17.6887	0	#N/A	17.6887	0
cyclohexane	C1CCCCC1	19.6257	19.9898	0.132595	22.0447	21.601	0.196848	22.6494	23.05	0.160466	23.5052	22.941	0.318311	22.3071	22.7935	0.236566	23.7334	22.1487	2.51121	22.3071	23.05	0.551886	#N/A	20.1476	0	22.0789	22.8806	0.642737	19.4545	20.1476	0.480294	20.3673	20.1476	0.0483073	22.9974	23.05	0.00276348	21.052	21.804	0.565518	23.5622	23.2925	0.0727732	19.968	20.8485	0.775268	20.8238	20.8485	0.0006112
cyclooctane	C1CCCCCCC1	25.3879	26.5928	1.45191	28.2918	28.8013	0.259615	#N/A	29.9789	0	#N/A	30.1413	0	#N/A	29.8142	0	#N/A	29.3316	0	#N/A	29.9789	0	#N/A	25.6815	0	#N/A	30.5075	0	#N/A	25.6815	0	#N/A	25.6815	0	#N/A	29.9789	0	#N/A	28.428	0	#N/A	30.5633	0	#N/A	27.168	0	#N/A	27.168	0
methylcyclopentane	CC1CCCC1	19.2263	19.9898	0.582926	23.2598	21.601	2.75185	#N/A	23.05	0	#N/A	22.941	0	#N/A	22.7935	0	#N/A	22.1487	0	#N/A	23.05	0	#N/A	20.1476	0	#N/A	22.8806	0	#N/A	20.1476	0	#N/A	20.1476	0	#N/A	23.05	0	#N/A	21.804	0	#N/A	23.2925	0	#N/A	20.8485	0	#N/A	20.8485	0
methylcyclohexane	CC1CCCCC1	22.1359	23.2913	1.3349	26.0668	25.2011	0.749323	#N/A	26.5145	0	#N/A	26.5411	0	#N/A	26.3038	0	#N/A	25.7401	0	#N/A	26.5145	0	#N/A	22.9145	0	#N/A	26.694	0	23.3911	22.9145	0.227074	24.1898	22.9145	1.62624	26.643	26.5145	0.0165226	#N/A	25.116	0	#N/A	26.9279	0	23.5622	24.0082	0.198911	24.3609	24.0082	0.124415
ethylcyclohexane	CCC1CCCCC1	26.0154	26.5928	0.333375	31.1329	28.8013	5.43652	#N/A	29.9789	0	32.2911	30.1413	4.62154	30.8077	29.8142	0.98717	31.7776	29.3316	5.98304	#N/A	29.9789	0	25.3879	25.6815	0.0862415	#N/A	30.5075	0	27.0994	25.6815	2.01036	28.1263	25.6815	5.97703	31.3783	29.9789	1.95813	29.3815	28.428	0.90904	32.177	30.5633	2.60404	27.9552	27.168	0.61972	29.1533	27.168	3.94142
cis-1,2-dimethylcyclohexane	C[C@@H]1([C@@H](CCCC1)(C))	25.3308	26.5928	1.59265	28.6227	28.8013	0.0319075	#N/A	29.9789	0	#N/A	30.1413	0	#N/A	29.8142	0	#N/A	29.3316	0	#N/A	29.9789	0	#N/A	25.6815	0	#N/A	30.5075	0	#N/A	25.6815	0	#N/A	25.6815	0	#N/A	29.9789	0	#N/A	28.428	0	#N/A	30.5633	0	#N/A	27.168	0	#N/A	27.168	0
trans-1,4-dimethylcyclohexane	CC1CCC(C)CC1	25.1597	26.5928	2.05394	28.7482	28.8013	0.00282105	#N/A	29.9789	0	#N/A	30.1413	0	#N/A	29.8142	0	#N/A	29.3316	0	#N/A	29.9789	0	#N/A	25.6815	0	#N/A	30.5075	0	#N/A	25.6815	0	#N/A	25.6815	0	#N/A	29.9789	0	#N/A	28.428	0	#N/A	30.5633	0	#N/A	27.168	0	#N/A	27.168	0
tetrachloromethane	[Cl]C([Cl])([Cl])[Cl]	16.1455	17.946	3.24159	16.4479	17.1768	0.531298	18.7129	21.2781	6.58059	18.827	18.7568	0.00491967	#N/A	19.3374	0	18.884	17.6007	1.64683	17.743	21.2781	12.4972	15.6321	19.6666	16.2775	#N/A	20.1751	0	16.659	19.6666	9.04576	#N/A	19.6666	0	19.7968	21.2781	2.19422	17.6859	19.1059	2.01632	#N/A	20.0309	0	17.6859	20.5735	8.33812	17.6859	20.5735	8.33812
benzene	c1ccccc1	11.8667	11.7171	0.0223884	12.3003	11.6928	0.369012	#N/A	15.0429	0	14.8904	14.3128	0.333617	16.4878	15.5317	0.914125	15.7462	14.1842	2.43982	13.5782	15.0429	2.14515	13.8635	14.8945	1.06301	15.4609	14.623	0.702076	14.8334	14.8945	0.0037394	14.8334	14.8945	0.0037394	16.2596	15.0429	1.48056	15.3468	15.0599	0.0823468	14.8904	14.9448	0.00296315	14.7193	15.368	0.420912	15.1757	15.368	0.0370048
water	O([H])[H]	-7.87309	-6.19687	2.8097	-25.3593	-25.8638	0.254522	#N/A	-10.2911	0	-23.1058	-22.9638	0.0201552	-15.6891	-16.9823	1.67232	-17.9712	-16.0126	3.83624	#N/A	-10.2911	0	#N/A	-7.30781	0	-19.6257	-19.6106	0.000228138	#N/A	-7.30781	0	#N/A	-7.30781	0	-10.1471	-10.2911	0.0207503	#N/A	-17.1202	0	#N/A	-20.2286	0	-8.39709	-6.24211	4.64394	#N/A	-6.24211	0
methanol	CO	-4.30738	-5.25037	0.889229	-15.8032	-16.2785	0.225906	-7.18847	-8.12103	0.869658	-12.7795	-13.2619	0.232721	-8.27245	-8.79986	0.278158	-7.58783	-7.68653	0.00974176	-10.2692	-8.12103	4.61485	-4.62116	-5.76658	1.31198	-10.5545	-12.1591	2.57467	#N/A	-5.76658	0	-6.04745	-5.76658	0.0788865	-5.13462	-8.12103	8.91861	-9.01412	-9.49402	0.230309	-11.8096	-11.9231	0.0128837	-4.05065	-5.49078	2.07398	-5.30578	-5.49078	0.0342253
ethanol	CCO	-1.74007	-1.94887	0.0435971	-12.4657	-12.6784	0.0452152	#N/A	-4.65655	0	-9.18527	-9.66176	0.227039	-5.41988	-5.2895	0.0169988	-4.96347	-4.09508	0.754093	-7.30258	-4.65655	7.00143	-2.79552	-2.99959	0.0416451	-6.61796	-8.34565	2.98491	#N/A	-2.99959	0	-3.76539	-2.99959	0.586453	-1.8827	-4.65655	7.69429	-5.93334	-6.18199	0.0618277	-7.87309	-8.28773	0.171928	-2.45321	-2.33104	0.0149252	-2.85257	-2.33104	0.271992
propan-1-ol	CCCO	1.42628	1.35264	0.00542406	-8.72316	-9.0782	0.126058	#N/A	-1.19208	0	-5.53398	-6.06159	0.278373	#N/A	-1.77915	0	-1.71154	-0.503636	1.45904	#N/A	-1.19208	0	#N/A	-0.232599	0	-4.1077	-4.53222	0.180216	#N/A	-0.232599	0	-0.798719	-0.232599	0.320492	1.36923	-1.19208	6.56033	-2.33911	-2.86997	0.281813	-4.27885	-4.65232	0.13948	#N/A	0.828698	0	0.456411	0.828698	0.138597
butan-1-ol	CCCCO	4.79232	4.65414	0.0190929	-4.90071	-5.47804	0.333305	#N/A	2.27239	0	-1.14103	-2.46143	1.74347	#N/A	1.73121	0	2.39616	3.08781	0.478387	-0.171154	2.27239	5.97092	#N/A	2.53439	0	-1.14103	-0.718786	0.178288	#N/A	2.53439	0	2.68141	2.53439	0.021616	#N/A	2.27239	0	0.855771	0.442061	0.171156	-0.39936	-1.01691	0.381374	#N/A	3.98844	0	3.93654	3.98844	0.00269267
pentan-1-ol	CCCCCO	8.61476	7.95564	0.434435	-1.39205	-1.87788	0.236024	#N/A	5.73687	0	2.28205	1.13873	1.30719	#N/A	5.24156	0	5.99039	6.67926	0.474538	#N/A	5.73687	0	#N/A	5.30138	0	2.225	3.09465	0.756278	#N/A	5.30138	0	#N/A	5.30138	0	#N/A	5.73687	0	4.1077	3.75409	0.12504	2.85257	2.61849	0.0547908	#N/A	7.14817	0	#N/A	7.14817	0
hexan-1-ol	CCCCCCO	11.5814	11.2571	0.105162	2.16795	1.72229	0.198618	#N/A	9.20134	0	5.59103	4.73889	0.726144	#N/A	8.75192	0	9.64168	10.2707	0.395676	#N/A	9.20134	0	#N/A	8.06837	0	7.24552	6.90808	0.11387	#N/A	8.06837	0	8.55771	8.06837	0.23945	#N/A	9.20134	0	6.96027	7.06612	0.011204	6.78911	6.2539	0.28645	#N/A	10.3079	0	10.6686	10.3079	0.130101
heptan-1-ol	CCCCCCCO	14.9475	14.5586	0.151177	5.84777	5.32245	0.275958	#N/A	12.6658	0	8.95707	8.33906	0.381936	#N/A	12.2623	0	13.7494	13.8622	0.0127188	#N/A	12.6658	0	#N/A	10.8354	0	11.0109	10.7215	0.0837557	#N/A	10.8354	0	12.7795	10.8354	3.77971	#N/A	12.6658	0	10.7827	10.3781	0.163673	10.6116	9.88931	0.521636	#N/A	13.4677	0	#N/A	13.4677	0
octan-1-ol	CCCCCCCCO	17.5148	17.8601	0.119284	9.23662	8.92261	0.0985996	#N/A	16.1303	0	11.9237	11.9392	0.000239683	#N/A	15.7726	0	#N/A	17.4536	0	#N/A	16.1303	0	#N/A	13.6023	0	16.6019	14.5349	4.27253	#N/A	13.6023	0	15.3468	13.6023	3.04318	#N/A	16.1303	0	#N/A	13.6902	0	#N/A	13.5247	0	#N/A	16.6274	0	17.1725	16.6274	0.297107
nonan-1-ol	CCCCCCCCCO	21.5084	21.1616	0.120214	12.9507	12.5228	0.183088	#N/A	19.5948	0	#N/A	15.5394	0	#N/A	19.283	0	#N/A	21.0451	0	#N/A	19.5948	0	#N/A	16.3693	0	#N/A	18.3484	0	#N/A	16.3693	0	#N/A	16.3693	0	#N/A	19.5948	0	#N/A	17.0022	0	#N/A	17.1601	0	#N/A	19.7871	0	#N/A	19.7871	0
decan-1-ol	CCCCCCCCCCO	23.5052	24.4632	0.917736	16.7731	16.1229	0.422717	#N/A	23.0592	0	#N/A	19.1395	0	#N/A	22.7933	0	#N/A	24.6365	0	#N/A	23.0592	0	#N/A	19.1363	0	#N/A	22.1618	0	#N/A	19.1363	0	#N/A	19.1363	0	#N/A	23.0592	0	#N/A	20.3142	0	#N/A	20.7955	0	#N/A	22.9469	0	#N/A	22.9469	0
dimethylether	COC	0.570514	-0.673065	1.54649	-0.656091	-2.75426	4.40233	#N/A	-1.01488	0	#N/A	0.0318009	0	#N/A	2.4401	0	#N/A	3.15626	0	#N/A	-1.01488	0	#N/A	0.112969	0	#N/A	-0.835791	0	#N/A	0.112969	0	#N/A	0.112969	0	#N/A	-1.01488	0	#N/A	1.4032	0	1.14103	0.134112	1.01388	#N/A	-0.281593	0	#N/A	-0.281593	0
diethyl ether	CCOCC	5.07757	5.92994	0.726529	4.19328	4.44606	0.0639008	7.75899	5.91407	3.40373	7.41668	7.23213	0.0340596	9.07117	9.46081	0.151819	10.0981	10.3392	0.0581128	6.56091	5.91407	0.418403	#N/A	5.64695	0	#N/A	6.79107	0	#N/A	5.64695	0	#N/A	5.64695	0	7.35963	5.91407	2.08964	7.07437	8.02726	0.907999	9.58463	7.40493	4.7511	6.27565	6.03788	0.0565336	#N/A	6.03788	0
dipropylether	CCCOCCC	11.5814	12.5329	0.905379	11.7184	11.6464	0.00517895	#N/A	12.843	0	15.0616	14.4325	0.395781	15.8603	16.4815	0.385935	#N/A	17.5221	0	#N/A	12.843	0	#N/A	11.1809	0	#N/A	14.4179	0	#N/A	11.1809	0	#N/A	11.1809	0	#N/A	12.843	0	#N/A	14.6513	0	#N/A	14.6757	0	#N/A	12.3574	0	13.1218	12.3574	0.584394
dibutylether	CCCCOCCCC	18.3135	19.1359	0.676434	18.9068	18.8467	0.00361355	#N/A	19.772	0	22.7635	21.6328	1.27853	#N/A	23.5022	0	#N/A	24.705	0	19.4545	19.772	0.10077	#N/A	16.7149	0	#N/A	22.0448	0	#N/A	16.7149	0	#N/A	16.7149	0	22.1473	19.772	5.64244	21.5084	21.2754	0.0542875	#N/A	21.9466	0	#N/A	18.6768	0	#N/A	18.6768	0
chlorobenzene	[Cl]c1ccccc1	16.4878	17.0089	0.27152	16.1855	16.2727	0.00760808	#N/A	20.2873	0	18.9411	18.994	0.00279788	20.025	20.0847	0.00356524	19.3975	18.3247	1.15077	#N/A	20.2873	0	#N/A	19.609	0	#N/A	19.8034	0	#N/A	19.609	0	#N/A	19.609	0	20.5955	20.2873	0.094985	#N/A	19.6237	0	19.1693	19.8202	0.423692	18.9411	20.6218	2.82501	#N/A	20.6218	0
1,2-dichlorobenzene	[Cl]c1ccccc1[Cl]	19.5686	20.8774	1.71284	20.0707	19.5526	0.268415	#N/A	24.2318	0	22.7064	22.4751	0.0535263	#N/A	23.6377	0	#N/A	21.6153	0	#N/A	24.2318	0	#N/A	23.1871	0	#N/A	23.7838	0	#N/A	23.1871	0	#N/A	23.1871	0	24.0186	24.2318	0.0454586	#N/A	23.1376	0	#N/A	23.4955	0	#N/A	24.7393	0	#N/A	24.7393	0
1,2-dichloroethane	[Cl]CC[Cl]	8.4436	6.59514	3.41681	7.20559	9.24473	4.1581	11.125	10.8484	0.0765032	10.4975	11.3847	0.787264	#N/A	12.4111	0	12.1519	12.2393	0.00762339	9.92694	10.8484	0.849138	#N/A	10.2252	0	#N/A	10.7304	0	#N/A	10.2252	0	#N/A	10.2252	0	13.4641	10.8484	6.84188	12.3231	11.4989	0.679293	#N/A	11.5223	0	#N/A	10.2236	0	12.5513	10.2236	5.41814
methane	C	6.2186	6.7838	0.319451	6.49815	7.20033	0.493048	8.45501	9.19208	0.543271	7.54219	8.54033	0.996271	#N/A	8.75205	0	#N/A	7.7829	0	#N/A	9.19208	0	#N/A	9.07959	0	#N/A	7.62686	0	#N/A	9.07959	0	#N/A	9.07959	0	7.31399	9.19208	3.52725	#N/A	8.55586	0	6.45822	8.75082	5.25602	7.08578	8.20952	1.26279	#N/A	8.20952	0
ethane	CC	10.3263	10.0853	0.0580792	10.429	10.8005	0.13801	12.4714	12.6566	0.0342718	11.7868	12.1405	0.125085	#N/A	12.2624	0	#N/A	11.3743	0	#N/A	12.6566	0	#N/A	11.8466	0	#N/A	11.4403	0	#N/A	11.8466	0	#N/A	11.8466	0	11.1592	12.6566	2.24193	#N/A	11.8679	0	10.9881	12.3862	1.95477	10.4746	11.3693	0.800358	#N/A	11.3693	0
propane	CCC	13.4641	13.3868	0.00597836	14.183	14.4007	0.0473841	#N/A	16.121	0	15.8375	15.7407	0.00937236	#N/A	15.7728	0	#N/A	14.9658	0	#N/A	16.121	0	#N/A	14.6136	0	#N/A	15.2537	0	#N/A	14.6136	0	#N/A	14.6136	0	#N/A	16.121	0	#N/A	15.1799	0	14.9246	16.0216	1.2034	13.8977	14.529	0.398518	#N/A	14.529	0
butane	CCCC	16.4878	16.6883	0.0401836	17.8856	18.0008	0.0132727	#N/A	19.5855	0	19.8539	19.3408	0.263236	#N/A	19.2831	0	#N/A	18.5572	0	18.884	19.5855	0.492101	#N/A	17.3806	0	#N/A	19.0672	0	#N/A	17.3806	0	#N/A	17.3806	0	#N/A	19.5855	0	#N/A	18.4919	0	18.3705	19.657	1.65509	17.5718	17.6887	0.0136686	18.3135	17.6887	0.390319
trimethylamine	CN(C)C	1.08398	1.41857	0.111955	-4.16475	-5.82009	2.74015	-3.53719	-4.28424	0.55809	-1.31218	-2.38279	1.1462	#N/A	1.19327	0	2.90962	3.00793	0.00966436	#N/A	-4.28424	0	#N/A	-3.147	0	-1.71154	-2.93048	1.48581	#N/A	-3.147	0	#N/A	-3.147	0	#N/A	-4.28424	0	#N/A	-0.466733	0	-1.71154	-2.22761	0.266325	-2.68141	-2.95271	0.0736033	#N/A	-2.95271	0
triethylamine	CCN(CC)CC	8.27245	11.3231	9.30635	3.87949	4.9804	1.21199	5.13462	6.10918	0.949763	6.73206	8.4177	2.84137	#N/A	11.7243	0	10.6116	13.7823	10.0535	#N/A	6.10918	0	#N/A	5.15397	0	#N/A	8.50982	0	#N/A	5.15397	0	#N/A	5.15397	0	5.76219	6.10918	0.120404	4.84937	9.46935	21.3442	5.64809	8.67862	9.18412	3.48013	6.5265	9.28035	3.93654	6.5265	6.70787
piperidine	C1CCNCC1	4.79232	5.27588	0.233832	-3.73686	-3.25396	0.233202	#N/A	-0.912694	0	#N/A	-0.0252115	0	#N/A	3.65989	0	5.36283	5.48611	0.0151983	#N/A	-0.912694	0	#N/A	-0.534839	0	-0.228205	0.271983	0.250188	#N/A	-0.534839	0	#N/A	-0.534839	0	0.570514	-0.912694	2.19991	#N/A	1.94379	0	#N/A	0.550022	0	#N/A	0.274236	0	#N/A	0.274236	0
diethylamine	CCNCC	3.30898	5.27588	3.86869	-3.39456	-3.25396	0.0197688	#N/A	-0.912694	0	0.171154	-0.0252115	0.0385594	#N/A	3.65989	0	4.50706	5.48611	0.958543	#N/A	-0.912694	0	#N/A	-0.534839	0	-0.228205	0.271983	0.250188	#N/A	-0.534839	0	#N/A	-0.534839	0	#N/A	-0.912694	0	-0.342308	1.94379	5.22622	#N/A	0.550022	0	-1.36923	0.274236	2.70099	#N/A	0.274236	0
dipropylamine	CCCNCCC	9.52758	11.8789	5.52862	3.82815	3.94637	0.0139767	#N/A	6.01625	0	#N/A	7.17511	0	#N/A	10.6806	0	#N/A	12.669	0	#N/A	6.01625	0	#N/A	4.99914	0	5.99039	7.89885	3.64219	#N/A	4.99914	0	#N/A	4.99914	0	#N/A	6.01625	0	#N/A	8.56784	0	#N/A	7.82084	0	#N/A	6.59371	0	#N/A	6.59371	0
dibutylamine	CCCCNCCCC	16.1455	18.4819	5.45852	11.2334	11.1467	0.00752038	#N/A	12.9452	0	#N/A	14.3754	0	#N/A	17.7013	0	#N/A	19.8519	0	#N/A	12.9452	0	#N/A	10.5331	0	#N/A	15.5257	0	#N/A	10.5331	0	#N/A	10.5331	0	#N/A	12.9452	0	#N/A	15.1919	0	#N/A	15.0917	0	#N/A	12.9132	0	#N/A	12.9132	0
methylamine	CN	-3.25193	-2.62169	0.397196	-11.6385	-13.4025	3.11193	#N/A	-9.71312	0	-9.29937	-10.512	1.47057	#N/A	-6.61804	0	-5.81924	-5.29916	0.270478	#N/A	-9.71312	0	#N/A	-7.51501	0	-7.93014	-10.223	5.25741	#N/A	-7.51501	0	#N/A	-7.51501	0	#N/A	-9.71312	0	#N/A	-7.5321	0	-10.041	-9.65774	0.146919	#N/A	-7.66219	0	#N/A	-7.66219	0
ethylamine	CCN	-0.741668	0.679808	2.02059	-9.25944	-9.80238	0.294789	#N/A	-6.24864	0	-7.24552	-6.91188	0.111317	#N/A	-3.10768	0	-1.9968	-1.70772	0.0835684	#N/A	-6.24864	0	#N/A	-4.74802	0	-7.41668	-6.40961	1.01418	#N/A	-4.74802	0	#N/A	-4.74802	0	#N/A	-6.24864	0	-5.47693	-4.22007	1.5797	-3.13783	-6.02233	8.32039	#N/A	-4.50245	0	#N/A	-4.50245	0
n-propylamine	CCCN	2.73847	3.98131	1.54466	-6.15584	-6.20222	0.00215081	#N/A	-2.78417	0	-3.36603	-3.31172	0.00294972	#N/A	0.402671	0	1.42628	1.88373	0.209259	-6.16155	-2.78417	11.4067	#N/A	-1.98103	0	-2.96667	-2.59618	0.137263	#N/A	-1.98103	0	#N/A	-1.98103	0	#N/A	-2.78417	0	-1.48334	-0.908042	0.330963	-3.36603	-2.38692	0.958649	#N/A	-1.34272	0	#N/A	-1.34272	0
n-butylamine	CCCCN	5.53398	7.28281	3.0584	-2.80693	-2.60206	0.0419718	#N/A	0.680303	0	0.228205	0.288443	0.00362855	#N/A	3.91303	0	4.27885	5.47518	1.4312	-2.45321	0.680303	9.8189	#N/A	0.785957	0	0.342308	1.21725	0.765525	#N/A	0.785957	0	#N/A	0.785957	0	#N/A	0.680303	0	1.02692	2.40399	1.8963	-0.285257	1.24848	2.35236	#N/A	1.81702	0	#N/A	1.81702	0
pentylamine	CCCCCN	8.50065	10.5843	4.34164	0.793014	0.998105	0.0420623	#N/A	4.14478	0	#N/A	3.88861	0	#N/A	7.42338	0	#N/A	9.06663	0	#N/A	4.14478	0	#N/A	3.55295	0	#N/A	5.03068	0	#N/A	3.55295	0	#N/A	3.55295	0	#N/A	4.14478	0	#N/A	5.71601	0	#N/A	4.88389	0	#N/A	4.97676	0	#N/A	4.97676	0
hexylamine	CCCCCCN	11.7526	13.8858	4.55069	4.30738	4.59827	0.0846164	#N/A	7.60925	0	#N/A	7.48877	0	#N/A	10.9337	0	#N/A	12.6581	0	#N/A	7.60925	0	#N/A	6.31994	0	#N/A	8.84411	0	#N/A	6.31994	0	#N/A	6.31994	0	#N/A	7.60925	0	#N/A	9.02804	0	#N/A	8.5193	0	#N/A	8.1365	0	#N/A	8.1365	0
heptylamine	CCCCCCCN	14.6622	17.1873	6.37621	7.83315	8.19843	0.133427	#N/A	11.0737	0	#N/A	11.0889	0	#N/A	14.4441	0	#N/A	16.2495	0	#N/A	11.0737	0	#N/A	9.08693	0	#N/A	12.6575	0	#N/A	9.08693	0	#N/A	9.08693	0	#N/A	11.0737	0	#N/A	12.3401	0	#N/A	12.1547	0	#N/A	11.2962	0	#N/A	11.2962	0
n-octylamine	CCCCCCCCN	17.6289	20.4888	8.1793	10.9539	11.7986	0.713567	#N/A	14.5382	0	#N/A	14.6891	0	#N/A	17.9544	0	#N/A	19.841	0	#N/A	14.5382	0	#N/A	11.8539	0	#N/A	16.471	0	#N/A	11.8539	0	#N/A	11.8539	0	#N/A	14.5382	0	#N/A	15.6521	0	#N/A	15.7901	0	#N/A	14.456	0	#N/A	14.456	0
cyclohexylamine	NC1CCCCC1	8.50065	10.5843	4.34164	2.43039	0.998105	2.05144	#N/A	4.14478	0	#N/A	3.88861	0	#N/A	7.42338	0	#N/A	9.06663	0	#N/A	4.14478	0	#N/A	3.55295	0	#N/A	5.03068	0	#N/A	3.55295	0	#N/A	3.55295	0	#N/A	4.14478	0	#N/A	5.71601	0	#N/A	4.88389	0	#N/A	4.97676	0	#N/A	4.97676	0
ethyl benzene	CCc1ccccc1	17.9712	18.4049	0.188084	18.245	19.3332	1.18407	#N/A	22.0267	0	20.4244	22.1652	3.03034	#N/A	23.1656	0	21.109	22.0358	0.858969	#N/A	22.0267	0	#N/A	20.5748	0	#N/A	22.5382	0	#N/A	20.5748	0	20.3673	20.5748	0.043039	21.9648	22.0267	0.00383651	#N/A	22.1914	0	21.109	22.636	2.33167	#N/A	21.772	0	20.3103	21.772	2.13665
toluene	Cc1ccccc1	15.575	15.1034	0.222461	15.2612	15.733	0.22257	17.5148	18.5622	1.0972	18.0853	18.565	0.230142	19.2263	19.6553	0.184005	19.4545	18.4444	1.02041	16.7161	18.5622	3.40843	16.1455	17.8078	2.76314	18.5417	18.7248	0.0335252	17.6289	17.8078	0.0320177	17.4007	17.8078	0.165763	19.0552	18.5622	0.242964	18.4846	18.8794	0.155818	18.0853	19.0006	0.837763	17.1154	18.6123	2.24061	17.6289	18.6123	0.967087
o-xylene	Cc1ccccc1C	17.8	18.4954	0.483552	18.7071	19.7732	1.13651	#N/A	22.0816	0	22.0789	22.8172	0.545143	#N/A	23.7788	0	22.3071	22.7045	0.157972	#N/A	22.0816	0	#N/A	20.7211	0	#N/A	22.8266	0	#N/A	20.7211	0	#N/A	20.7211	0	#N/A	22.0816	0	21.8507	22.6989	0.719496	#N/A	23.0563	0	#N/A	21.8565	0	#N/A	21.8565	0
m-xylene	Cc1cccc(C)c1	18.2564	18.4954	0.0571052	18.4219	19.7732	1.8261	#N/A	22.0816	0	20.3673	22.8172	6.00191	#N/A	23.7788	0	20.9949	22.7045	2.92286	#N/A	22.0816	0	#N/A	20.7211	0	#N/A	22.8266	0	#N/A	20.7211	0	#N/A	20.7211	0	#N/A	22.0816	0	21.5084	22.6989	1.41738	#N/A	23.0563	0	#N/A	21.8565	0	#N/A	21.8565	0
p-xylene	Cc1ccc(C)cc1	17.9712	18.4954	0.274811	18.536	19.7732	1.53073	#N/A	22.0816	0	20.5955	22.8172	4.93583	#N/A	23.7788	0	#N/A	22.7045	0	#N/A	22.0816	0	#N/A	20.7211	0	#N/A	22.8266	0	#N/A	20.7211	0	#N/A	20.7211	0	#N/A	22.0816	0	21.5654	22.6989	1.2848	#N/A	23.0563	0	#N/A	21.8565	0	#N/A	21.8565	0
mesitylene	Cc1cc(C)cc(C)c1	19.5116	21.3609	3.41987	21.0177	23.2934	5.1788	#N/A	25.081	0	#N/A	26.5894	0	#N/A	27.5023	0	#N/A	26.6247	0	#N/A	25.081	0	#N/A	23.1798	0	#N/A	26.4483	0	#N/A	23.1798	0	#N/A	23.1798	0	#N/A	25.081	0	#N/A	26.0984	0	#N/A	26.6321	0	#N/A	24.6461	0	#N/A	24.6461	0
1,2,4,5-tetramethylbenzene	Cc1cc(C)c(C)cc1C	23.3911	23.8147	0.179435	25.6674	26.2936	0.392143	27.6813	27.5604	0.0146237	#N/A	29.8816	0	#N/A	30.8258	0	#N/A	30.2049	0	27.0538	27.5604	0.256681	#N/A	25.1838	0	#N/A	29.5901	0	#N/A	25.1838	0	#N/A	25.1838	0	#N/A	27.5604	0	#N/A	29.078	0	#N/A	29.7278	0	#N/A	26.981	0	#N/A	26.981	0
propanone	CC(C)=O	-1.36923	-0.979595	0.151818	-6.46963	-5.39118	1.16304	-1.48334	-2.61157	1.27291	-2.56731	-2.2578	0.0957947	3.19488	1.23531	3.83989	2.62436	2.49354	0.0171143	-3.30898	-2.61157	0.486383	1.76859	-1.4949	10.6504	-0.285257	-2.07213	3.19291	#N/A	-1.4949	0	#N/A	-1.4949	0	0.114103	-2.61157	7.42928	1.71154	-0.0535647	3.1156	-0.969873	-1.64025	0.449401	1.19808	-1.13349	5.43624	0.513462	-1.13349	2.71247
butanone	CCC(C)=O	1.65449	2.32191	0.445446	-2.47032	-1.79102	0.461454	1.76859	0.852905	0.838483	1.54039	1.34236	0.0392155	6.50386	4.74567	3.09123	6.56091	6.08499	0.226498	0.0570514	0.852905	0.633384	4.3359	1.27209	9.38699	3.13783	1.7413	1.95027	#N/A	1.27209	0	3.76539	1.27209	6.21657	3.48013	0.852905	6.90233	5.24873	3.25846	3.96115	3.25193	1.99516	1.57946	3.9936	2.02624	3.87048	3.65129	2.02624	2.64077
pentan-2-one	CCCC(C)=O	4.79232	5.62341	0.690718	0.998399	1.80914	0.657305	#N/A	4.31738	0	5.36283	4.94252	0.176659	#N/A	8.25602	0	#N/A	9.67644	0	#N/A	4.31738	0	#N/A	4.03908	0	6.78911	5.55474	1.52369	#N/A	4.03908	0	#N/A	4.03908	0	#N/A	4.31738	0	#N/A	6.57049	0	7.35963	5.63057	2.98964	#N/A	5.18598	0	#N/A	5.18598	0
pentan-3-one	CCC(=O)CC	4.67821	5.62341	0.893397	1.7743	1.80914	0.00121416	#N/A	4.31738	0	#N/A	4.94252	0	#N/A	8.25602	0	#N/A	9.67644	0	#N/A	4.31738	0	#N/A	4.03908	0	#N/A	5.55474	0	#N/A	4.03908	0	#N/A	4.03908	0	#N/A	4.31738	0	#N/A	6.57049	0	#N/A	5.63057	0	#N/A	5.18598	0	#N/A	5.18598	0
hexan-2-one	CCCCC(C)=O	7.87309	8.92491	1.10633	4.9977	5.40931	0.169418	#N/A	7.78185	0	8.67181	8.54268	0.0166734	#N/A	11.7664	0	#N/A	13.2679	0	#N/A	7.78185	0	#N/A	6.80606	0	10.3263	9.36817	0.918015	#N/A	6.80606	0	#N/A	6.80606	0	#N/A	7.78185	0	#N/A	9.88252	0	10.6686	9.26598	1.96736	#N/A	8.34572	0	#N/A	8.34572	0
hexan-3-one	CCCC(=O)CC	#N/A	8.92491	0	4.91212	5.40931	0.24719	#N/A	7.78185	0	#N/A	8.54268	0	#N/A	11.7664	0	#N/A	13.2679	0	#N/A	7.78185	0	#N/A	6.80606	0	#N/A	9.36817	0	#N/A	6.80606	0	#N/A	6.80606	0	#N/A	7.78185	0	#N/A	9.88252	0	#N/A	9.26598	0	#N/A	8.34572	0	#N/A	8.34572	0
heptan-4-one	CCCC(=O)CCC	11.6385	12.2264	0.345666	8.30097	9.00947	0.501962	#N/A	11.2463	0	#N/A	12.1428	0	#N/A	15.2767	0	#N/A	16.8593	0	10.6686	11.2463	0.33376	#N/A	9.57305	0	#N/A	13.1816	0	#N/A	9.57305	0	#N/A	9.57305	0	#N/A	11.2463	0	#N/A	13.1945	0	#N/A	12.9014	0	#N/A	11.5055	0	#N/A	11.5055	0
4-methylpentan-2-one	CC(C)CC(C)=O	7.47373	8.92491	2.10593	4.84366	5.40931	0.319953	#N/A	7.78185	0	#N/A	8.54268	0	#N/A	11.7664	0	#N/A	13.2679	0	#N/A	7.78185	0	#N/A	6.80606	0	#N/A	9.36817	0	#N/A	6.80606	0	#N/A	6.80606	0	#N/A	7.78185	0	#N/A	9.88252	0	#N/A	9.26598	0	#N/A	8.34572	0	#N/A	8.34572	0
cyclopentanone	O=C1CCCC1	2.16795	2.32191	0.0237023	-1.30648	-1.79102	0.234783	#N/A	0.852905	0	3.48013	1.34236	4.57009	#N/A	4.74567	0	#N/A	6.08499	0	0.456411	0.852905	0.157208	#N/A	1.27209	0	#N/A	1.7413	0	#N/A	1.27209	0	#N/A	1.27209	0	#N/A	0.852905	0	6.50386	3.25846	10.5326	#N/A	1.99516	0	#N/A	2.02624	0	#N/A	2.02624	0
cyclohexanone	O=C1CCCCC1	4.62116	5.62341	1.0045	1.09539	1.80914	0.509448	#N/A	4.31738	0	5.53398	4.94252	0.349828	#N/A	8.25602	0	#N/A	9.67644	0	#N/A	4.31738	0	#N/A	4.03908	0	#N/A	5.55474	0	#N/A	4.03908	0	#N/A	4.03908	0	#N/A	4.31738	0	7.81604	6.57049	1.55139	#N/A	5.63057	0	#N/A	5.18598	0	#N/A	5.18598	0
cycloheptanone	O=C1CCCCCC1	#N/A	8.92491	0	5.45411	5.40931	0.0020076	#N/A	7.78185	0	#N/A	8.54268	0	#N/A	11.7664	0	#N/A	13.2679	0	#N/A	7.78185	0	#N/A	6.80606	0	#N/A	9.36817	0	#N/A	6.80606	0	#N/A	6.80606	0	#N/A	7.78185	0	#N/A	9.88252	0	#N/A	9.26598	0	#N/A	8.34572	0	#N/A	8.34572	0
cyclooctanone	O=C1CCCCCCC1	#N/A	12.2264	0	9.13392	9.00947	0.0154896	#N/A	11.2463	0	#N/A	12.1428	0	#N/A	15.2767	0	#N/A	16.8593	0	#N/A	11.2463	0	#N/A	9.57305	0	#N/A	13.1816	0	#N/A	9.57305	0	#N/A	9.57305	0	#N/A	11.2463	0	#N/A	13.1945	0	#N/A	12.9014	0	#N/A	11.5055	0	#N/A	11.5055	0
phenol	Oc1ccccc1	8.55771	7.91102	0.4182	-6.18437	-5.94507	0.0572663	#N/A	8.4584	0	-1.71154	-1.89307	0.0329509	3.65129	3.20125	0.202532	1.82564	2.91438	1.18534	#N/A	8.4584	0	#N/A	9.74667	0	2.1109	1.52605	0.342056	#N/A	9.74667	0	#N/A	9.74667	0	#N/A	8.4584	0	3.48013	2.61435	0.749584	1.42628	0.443825	0.965227	#N/A	12.0155	0	#N/A	12.0155	0
3-methylphenol	Cc1cccc(O)c1	11.2962	11.3009	2.24166e-05	-1.65449	-1.90486	0.0626862	#N/A	11.9778	0	#N/A	2.35914	0	#N/A	7.32478	0	5.07757	7.17456	4.39734	#N/A	11.9778	0	#N/A	12.66	0	#N/A	5.62782	0	#N/A	12.66	0	#N/A	12.66	0	#N/A	11.9778	0	2.68141	6.43387	14.0809	#N/A	4.49956	0	#N/A	15.2597	0	#N/A	15.2597	0
4-methylphenol	Cc1ccc(O)cc1	11.2391	11.3009	0.0038175	-1.07257	-1.90486	0.692717	#N/A	11.9778	0	1.25513	2.35914	1.21883	6.56091	7.32478	0.583495	6.04745	7.17456	1.27038	#N/A	11.9778	0	#N/A	12.66	0	5.07757	5.62782	0.302771	#N/A	12.66	0	#N/A	12.66	0	#N/A	11.9778	0	6.73206	6.43387	0.0889165	4.56411	4.49956	0.0041666	#N/A	15.2597	0	#N/A	15.2597	0
3,4-dimethylphenol	Cc1ccc(O)cc1C	12.7225	14.703	3.92263	1.19808	2.13534	0.878461	#N/A	15.4972	0	#N/A	6.61134	0	#N/A	11.4483	0	#N/A	11.4347	0	#N/A	15.4972	0	#N/A	15.5733	0	#N/A	9.72959	0	#N/A	15.5733	0	#N/A	15.5733	0	#N/A	15.4972	0	#N/A	10.2534	0	6.96027	8.5553	2.54412	#N/A	18.5039	0	#N/A	18.5039	0
3,5-dimethylphenol	Cc1cc(C)cc(O)c1	13.4071	14.703	1.67948	1.46052	2.13534	0.45539	#N/A	15.4972	0	4.67821	6.61134	3.73699	#N/A	11.4483	0	#N/A	11.4347	0	#N/A	15.4972	0	#N/A	15.5733	0	#N/A	9.72959	0	#N/A	15.5733	0	#N/A	15.5733	0	#N/A	15.4972	0	#N/A	10.2534	0	7.18847	8.5553	1.86821	#N/A	18.5039	0	#N/A	18.5039	0
3-chlorophenol	Oc1cccc([Cl])c1	14.2628	12.9333	1.7676	-0.439296	-1.62518	1.40632	#N/A	13.4429	0	2.79552	2.54807	0.0612287	7.30258	7.55425	0.0633382	5.81924	6.88492	1.13567	#N/A	13.4429	0	#N/A	14.2338	0	#N/A	6.46642	0	#N/A	14.2338	0	#N/A	14.2338	0	#N/A	13.4429	0	7.30258	6.96821	0.1118	5.70514	5.07916	0.391849	#N/A	17.0419	0	#N/A	17.0419	0
4-chlorophenol	Oc1ccc([Cl])cc1	13.6923	12.9333	0.576078	-2.19648	-1.62518	0.326382	#N/A	13.4429	0	2.28205	2.54807	0.0707656	#N/A	7.55425	0	#N/A	6.88492	0	#N/A	13.4429	0	#N/A	14.2338	0	#N/A	6.46642	0	#N/A	14.2338	0	#N/A	14.2338	0	#N/A	13.4429	0	7.58783	6.96821	0.383932	5.93334	5.07916	0.72963	#N/A	17.0419	0	#N/A	17.0419	0
3,4-dichlorophenol	Oc1ccc([Cl])c([Cl])c1	18.9981	16.8146	4.76768	0.342308	1.65471	1.72239	#N/A	17.3874	0	#N/A	6.02921	0	#N/A	11.1072	0	#N/A	10.1755	0	#N/A	17.3874	0	#N/A	17.8118	0	#N/A	10.4468	0	#N/A	17.8118	0	#N/A	17.8118	0	#N/A	17.3874	0	#N/A	10.4821	0	#N/A	8.75449	0	#N/A	21.1592	0	#N/A	21.1592	0
3,5-dichlorophenol	Oc1cc([Cl])cc([Cl])c1	20.6526	16.8146	14.7302	2.24782	1.65471	0.351788	#N/A	17.3874	0	#N/A	6.02921	0	#N/A	11.1072	0	#N/A	10.1755	0	#N/A	17.3874	0	#N/A	17.8118	0	#N/A	10.4468	0	#N/A	17.8118	0	#N/A	17.8118	0	#N/A	17.3874	0	#N/A	10.4821	0	#N/A	8.75449	0	#N/A	21.1592	0	#N/A	21.1592	0
chloroethane	[Cl]CC	8.15835	8.34022	0.0330787	6.94886	10.0226	9.44795	#N/A	11.7525	0	#N/A	11.7626	0	#N/A	12.3367	0	#N/A	11.8068	0	#N/A	11.7525	0	#N/A	11.0359	0	#N/A	11.0854	0	#N/A	11.0359	0	#N/A	11.0359	0	#N/A	11.7525	0	#N/A	11.6834	0	9.75578	11.9543	4.83328	#N/A	10.7964	0	#N/A	10.7964	0
1-chloropropane	CCC[Cl]	11.6385	11.6417	1.05222e-05	11.1935	13.6228	5.90146	#N/A	15.217	0	14.0917	15.3628	1.61565	#N/A	15.8471	0	13.7494	15.3982	2.71876	#N/A	15.217	0	#N/A	13.8029	0	#N/A	14.8988	0	#N/A	13.8029	0	#N/A	13.8029	0	#N/A	15.217	0	14.0917	14.9954	0.816732	#N/A	15.5897	0	#N/A	13.9562	0	14.0346	13.9562	0.0061566
1-chlorobutane	CCCC[Cl]	15.0616	14.9432	0.0140037	14.8448	17.2229	5.65568	17.6289	18.6814	1.10789	17.3436	18.9629	2.62219	#N/A	19.3575	0	#N/A	18.9897	0	16.4878	18.6814	4.81184	#N/A	16.5699	0	#N/A	18.7122	0	#N/A	16.5699	0	#N/A	16.5699	0	#N/A	18.6814	0	17.8571	18.3074	0.202833	17.5148	19.2251	2.92514	17.1154	17.1159	2.49954e-07	#N/A	17.1159	0
1,3-dichloropropane	[Cl]CCC[Cl]	11.4103	9.89664	2.29108	9.79002	12.8449	9.33228	#N/A	14.3129	0	13.8064	14.9849	1.38877	#N/A	15.9214	0	#N/A	15.8307	0	#N/A	14.3129	0	#N/A	12.9922	0	#N/A	14.5438	0	#N/A	12.9922	0	#N/A	12.9922	0	#N/A	14.3129	0	#N/A	14.8109	0	#N/A	15.1577	0	15.6321	13.3834	5.05677	#N/A	13.3834	0
1-chloropentane	CCCCC[Cl]	17.743	18.2447	0.251754	18.1024	20.8231	7.40219	#N/A	22.1459	0	#N/A	22.5631	0	#N/A	22.8678	0	#N/A	22.5811	0	19.7398	22.1459	5.78949	#N/A	19.3369	0	#N/A	22.5256	0	#N/A	19.3369	0	#N/A	19.3369	0	23.4424	22.1459	1.68091	#N/A	21.6195	0	#N/A	22.8605	0	20.025	20.2757	0.0628094	#N/A	20.2757	0
1-chloroheptane	CCCCCCC[Cl]	23.6763	24.8477	1.37221	25.2053	28.0234	7.94183	#N/A	29.0749	0	#N/A	29.7634	0	#N/A	29.8885	0	#N/A	29.764	0	#N/A	29.0749	0	#N/A	24.8709	0	#N/A	30.1525	0	#N/A	24.8709	0	#N/A	24.8709	0	#N/A	29.0749	0	#N/A	28.2435	0	#N/A	30.1313	0	#N/A	26.5951	0	#N/A	26.5951	0
naphthalene	c1ccc2ccccc2c1	18.9696	18.8185	0.0228111	19.4032	19.1775	0.0509122	22.5923	22.5787	0.000185501	21.8507	23.024	1.37664	23.8475	24.503	0.429733	22.9347	22.7767	0.024947	#N/A	22.5787	0	22.0789	22.1324	0.00285938	#N/A	23.4379	0	#N/A	22.1324	0	#N/A	22.1324	0	24.3039	22.5787	2.97618	23.5052	23.6222	0.0136979	22.8776	23.4375	0.31354	22.7635	23.5366	0.597624	#N/A	23.5366	0
phenanthrene	c1ccc2c(c1)ccc3ccccc23	25.6161	25.0956	0.270933	27.5672	25.8981	2.78584	#N/A	29.3505	0	29.952	31.0298	1.16173	#N/A	32.8865	0	28.868	30.8696	4.00646	28.0693	29.3505	1.64146	28.1263	28.7022	0.331604	#N/A	31.5474	0	30.4654	28.7022	3.10907	30.7507	28.7022	4.1964	32.0629	29.3505	7.35712	#N/A	31.5674	0	#N/A	31.2249	0	31.1501	31.0371	0.0127653	31.2071	31.0371	0.028912
﻿anthracene	c1ccc2cc3ccccc3cc2c1	25.3879	25.0956	0.0854425	25.8899	25.8981	6.76747e-05	28.1834	29.3505	1.3621	29.3244	31.0298	2.90839	31.8917	32.8865	0.989589	30.6366	30.8696	0.0542996	27.1565	29.3505	4.81371	26.4148	28.7022	5.23216	30.5225	31.5474	1.05037	28.7539	28.7022	0.0026744	29.3244	28.7022	0.387168	32.4052	29.3505	9.33125	#N/A	31.5674	0	30.9218	31.2249	0.0918498	29.6097	31.0371	2.03748	30.1802	31.0371	0.73426
pyrene	c1cc2ccc3cccc4ccc(c1)c2c34	28.5257	26.1765	5.51889	30.4255	27.5225	8.42739	31.8347	30.6248	1.46384	32.9757	33.7394	0.583228	#N/A	35.9493	0	35.0295	33.8656	1.35475	30.7507	30.6248	0.0158549	29.7238	30.4809	0.573197	34.1167	33.7547	0.131028	32.4622	30.4809	3.92582	33.261	30.4809	7.72889	36.1135	30.6248	30.1263	35.1436	34.3295	0.662783	#N/A	33.5042	0	33.2039	33.0644	0.0194645	34.2308	33.0644	1.36058
pyridine	c1ccncc1	3.70834	5.31743	2.58916	-2.38475	-2.74919	0.132816	#N/A	0.225232	0	1.8827	1.29081	0.350325	#N/A	4.62891	0	7.35963	4.82592	6.41966	#N/A	0.225232	0	#N/A	2.26962	0	2.45321	1.04699	1.97746	#N/A	2.26962	0	#N/A	2.26962	0	#N/A	0.225232	0	4.1077	3.58684	0.271296	#N/A	1.60179	0	3.02372	2.52606	0.247671	2.85257	2.52606	0.10661
acetonitrile	CC#N	-1.93975	-3.1982	1.58369	-6.33841	-6.78746	0.201651	-1.08398	-2.70574	2.63012	-3.59424	-4.0193	0.180682	3.42308	-0.428847	14.8374	2.28205	0.463445	3.30734	-4.16475	-2.70574	2.12871	#N/A	-1.5048	0	#N/A	-3.01656	0	3.53719	-1.5048	25.4216	#N/A	-1.5048	0	1.71154	-2.70574	19.5124	2.16795	-1.35628	12.4202	-0.627565	-2.86766	5.01801	-0.228205	-1.01762	0.623182	2.39616	-1.01762	11.6539
propionitrile	CCC#N	0.912822	0.103307	0.655315	-4.21039	-3.1873	1.04671	#N/A	0.758732	0	-0.285257	-0.419141	0.017925	#N/A	3.08151	0	#N/A	4.05489	0	#N/A	0.758732	0	#N/A	1.26219	0	#N/A	0.79687	0	#N/A	1.26219	0	#N/A	1.26219	0	#N/A	0.758732	0	4.73526	1.95575	7.72571	2.51026	0.767753	3.03633	#N/A	2.14211	0	#N/A	2.14211	0
1-cyanopropane	CCCC#N	3.42308	3.40481	0.000333936	-0.696027	0.412862	1.22963	#N/A	4.22321	0	#N/A	3.18102	0	#N/A	6.59186	0	#N/A	7.64634	0	#N/A	4.22321	0	#N/A	4.02918	0	#N/A	4.6103	0	#N/A	4.02918	0	#N/A	4.02918	0	#N/A	4.22321	0	#N/A	5.26777	0	#N/A	4.40316	0	#N/A	5.30185	0	#N/A	5.30185	0
1-cyanobutane	CCCCC#N	5.36283	6.70631	1.80494	3.01231	4.01302	1.00142	#N/A	7.68768	0	#N/A	6.78118	0	#N/A	10.1022	0	#N/A	11.2378	0	#N/A	7.68768	0	#N/A	6.79617	0	#N/A	8.42373	0	#N/A	6.79617	0	#N/A	6.79617	0	#N/A	7.68768	0	#N/A	8.5798	0	#N/A	8.03857	0	#N/A	8.46159	0	#N/A	8.46159	0
biphenyl	c1ccc(cc1)c1ccccc1	22.8776	22.3657	0.262056	23.1857	22.7455	0.193718	24.8173	26.5479	2.99493	27.4417	26.9095	0.283201	28.1834	28.6481	0.216005	26.643	26.8744	0.0535428	25.9013	26.5479	0.418104	26.7	25.5874	1.23788	#N/A	27.9293	0	#N/A	25.5874	0	#N/A	25.5874	0	#N/A	26.5479	0	27.9552	27.5709	0.147679	27.6129	27.5349	0.00607348	#N/A	27.6737	0	#N/A	27.6737	0
ammonia	N	-7.98719	-7.37263	0.37769	-16.3794	-16.4701	0.00821646	#N/A	-11.7039	0	-13.6923	-13.9087	0.0467993	#N/A	-9.96702	0	-8.1013	-8.97954	0.771307	#N/A	-11.7039	0	#N/A	-9.05833	0	#N/A	-13.2013	0	#N/A	-9.05833	0	#N/A	-9.05833	0	#N/A	-11.7039	0	#N/A	-10.4803	0	-12.4943	-12.7048	0.0443299	-9.75578	-9.3761	0.144163	-10.0981	-9.3761	0.521278
t-butyl chloride	CC(C)(C)[Cl]	14.7478	15.4723	0.524876	17.5319	17.2229	0.0954515	18.7129	18.6814	0.000986719	19.8539	18.9629	0.79378	#N/A	19.3575	0	#N/A	18.9897	0	#N/A	18.6814	0	#N/A	16.5699	0	#N/A	18.7122	0	#N/A	16.5699	0	#N/A	16.5699	0	18.827	18.6814	0.0211746	19.5116	18.3074	1.44991	19.4545	19.2251	0.0526443	#N/A	17.1159	0	#N/A	17.1159	0
tetrahydropyran	C1CCOCC1	4.53558	5.92994	1.94422	4.03353	4.44606	0.170181	#N/A	5.91407	0	#N/A	7.23213	0	#N/A	9.46081	0	11.2391	10.3392	0.809931	#N/A	5.91407	0	#N/A	5.64695	0	#N/A	6.79107	0	#N/A	5.64695	0	#N/A	5.64695	0	#N/A	5.91407	0	#N/A	8.02726	0	#N/A	7.40493	0	#N/A	6.03788	0	#N/A	6.03788	0
tetrahydrofuran	C1CCOC1	2.62436	2.62844	1.65933e-05	0.43359	0.845899	0.169999	#N/A	2.44959	0	3.25193	3.63196	0.144427	#N/A	5.95045	0	7.41668	6.74771	0.447518	1.31218	2.44959	1.29371	#N/A	2.87996	0	#N/A	2.97764	0	#N/A	2.87996	0	#N/A	2.87996	0	3.30898	2.44959	0.738545	4.3359	4.71523	0.14389	2.33911	3.76952	2.04609	2.62436	2.87815	0.0644052	#N/A	2.87815	0
tetrahydrothiophene	C1CCSC1	9.18527	6.06659	9.72619	7.9929	7.31674	0.457185	#N/A	8.80375	0	#N/A	10.0084	0	#N/A	11.5325	0	#N/A	11.6233	0	#N/A	8.80375	0	#N/A	8.65865	0	#N/A	9.18672	0	#N/A	8.65865	0	#N/A	8.65865	0	#N/A	8.80375	0	#N/A	10.4251	0	#N/A	10.0026	0	#N/A	8.73985	0	#N/A	8.73985	0
4-ethylphenol	CCc1ccc(O)cc1	14.7193	14.6024	0.0136528	1.35212	1.6953	0.117775	#N/A	15.4423	0	4.90642	5.9593	1.10856	9.47053	10.8351	1.86214	8.38655	10.766	5.66179	#N/A	15.4423	0	#N/A	15.427	0	#N/A	9.44125	0	#N/A	15.427	0	#N/A	15.427	0	#N/A	15.4423	0	9.52758	9.7459	0.0476644	7.41668	8.13497	0.515942	#N/A	18.4194	0	#N/A	18.4194	0
d-valerolactam	O=C1CCCCN1	-2.65289	-0.0286857	6.88644	-15.9059	-18.0867	4.75579	#N/A	-8.78677	0	#N/A	-13.7155	0	#N/A	-6.8948	0	#N/A	-4.10187	0	#N/A	-8.78677	0	#N/A	-6.99482	0	#N/A	-11.0368	0	#N/A	-6.99482	0	#N/A	-6.99482	0	#N/A	-8.78677	0	#N/A	-8.73734	0	#N/A	-11.8272	0	#N/A	-4.83157	0	#N/A	-4.83157	0
N-methyl-delta-valerolactam	CN1C(=O)CCCC1	-1.31218	1.01902	5.4345	-5.35712	-8.01806	7.08057	#N/A	-5.69435	0	#N/A	-3.58688	0	#N/A	1.67157	0	#N/A	4.51435	0	#N/A	-5.69435	0	#N/A	-4.63685	0	#N/A	-3.03543	0	#N/A	-4.63685	0	#N/A	-4.63685	0	#N/A	-5.69435	0	#N/A	-0.681372	0	#N/A	-3.02464	0	#N/A	-3.21089	0	#N/A	-3.21089	0
n,n-dimethylacetamide	CN(C)C(C)=O	-4.39296	-2.28248	4.4541	-13.6752	-11.6182	4.23122	#N/A	-9.15883	0	#N/A	-7.18705	0	#N/A	-1.83879	0	-0.718847	0.922899	2.69533	#N/A	-9.15883	0	#N/A	-7.40384	0	#N/A	-6.84886	0	#N/A	-7.40384	0	#N/A	-7.40384	0	#N/A	-9.15883	0	-4.14193	-3.9934	0.0220612	#N/A	-6.66005	0	#N/A	-6.37063	0	#N/A	-6.37063	0
n-methylpiperidine	CN1CCCCC1	7.35963	8.02158	0.438178	2.73847	1.38024	1.84479	#N/A	2.64471	0	#N/A	4.81754	0	#N/A	8.21398	0	7.75899	10.1908	5.91384	#N/A	2.64471	0	#N/A	2.38698	0	#N/A	4.69639	0	#N/A	2.38698	0	#N/A	2.38698	0	#N/A	2.64471	0	#N/A	6.15732	0	#N/A	5.04321	0	#N/A	3.36676	0	#N/A	3.36676	0
2-methylpiperidine	CC1CCCCN1	#N/A	8.57738	0	0.456411	0.346208	0.0121448	#N/A	2.55178	0	#N/A	3.57495	0	#N/A	7.17025	0	#N/A	9.07756	0	#N/A	2.55178	0	#N/A	2.23215	0	#N/A	4.08541	0	#N/A	2.23215	0	#N/A	2.23215	0	#N/A	2.55178	0	#N/A	5.25581	0	#N/A	4.18543	0	#N/A	3.43397	0	#N/A	3.43397	0
3-methylpiperidine	CC1CCCNC1	#N/A	8.57738	0	0.416475	0.346208	0.00493752	#N/A	2.55178	0	#N/A	3.57495	0	#N/A	7.17025	0	#N/A	9.07756	0	#N/A	2.55178	0	#N/A	2.23215	0	#N/A	4.08541	0	#N/A	2.23215	0	#N/A	2.23215	0	#N/A	2.55178	0	#N/A	5.25581	0	#N/A	4.18543	0	#N/A	3.43397	0	#N/A	3.43397	0
4-methylpiperidine	CC1CCNCC1	#N/A	8.57738	0	0.450706	0.346208	0.0109199	#N/A	2.55178	0	#N/A	3.57495	0	#N/A	7.17025	0	#N/A	9.07756	0	#N/A	2.55178	0	#N/A	2.23215	0	#N/A	4.08541	0	#N/A	2.23215	0	#N/A	2.23215	0	#N/A	2.55178	0	#N/A	5.25581	0	#N/A	4.18543	0	#N/A	3.43397	0	#N/A	3.43397	0
n-methyl-2-pyrrolidinone	CN1CCCC1=O	-4.76379	-2.28248	6.15688	-10.8854	-11.6182	0.537023	#N/A	-9.15883	0	#N/A	-7.18705	0	#N/A	-1.83879	0	#N/A	0.922899	0	#N/A	-9.15883	0	#N/A	-7.40384	0	#N/A	-6.84886	0	#N/A	-7.40384	0	#N/A	-7.40384	0	#N/A	-9.15883	0	#N/A	-3.9934	0	#N/A	-6.66005	0	#N/A	-6.37063	0	#N/A	-6.37063	0
dimethylsulfide	CSC	10.0981	2.76508	53.773	4.8893	3.71658	1.37528	#N/A	5.33928	0	#N/A	6.40828	0	#N/A	8.0221	0	#N/A	8.03184	0	#N/A	5.33928	0	#N/A	5.89166	0	#N/A	5.37329	0	#N/A	5.89166	0	#N/A	5.89166	0	#N/A	5.33928	0	#N/A	7.11304	0	#N/A	6.36716	0	#N/A	5.58012	0	#N/A	5.58012	0
diethylsulfide	CCSCC	11.125	9.36809	3.0868	11.1307	10.9169	0.0457179	#N/A	12.2682	0	#N/A	13.6086	0	#N/A	15.0428	0	20.6526	15.2147	29.5704	#N/A	12.2682	0	#N/A	11.4256	0	#N/A	13.0002	0	#N/A	11.4256	0	#N/A	11.4256	0	#N/A	12.2682	0	#N/A	13.7371	0	#N/A	13.638	0	#N/A	11.8996	0	#N/A	11.8996	0
dipropylsulfide	CCCSCCC	16.8872	15.9711	0.839264	17.5148	18.1172	0.362957	#N/A	19.1972	0	#N/A	20.8089	0	#N/A	22.0635	0	#N/A	22.3976	0	#N/A	19.1972	0	#N/A	16.9596	0	#N/A	20.627	0	#N/A	16.9596	0	#N/A	16.9596	0	#N/A	19.1972	0	#N/A	20.3612	0	#N/A	20.9088	0	#N/A	18.2191	0	#N/A	18.2191	0
diisopropylsulfide	CC(C)SC(C)C	14.3769	15.9711	2.5413	15.1471	18.1172	8.82144	#N/A	19.1972	0	#N/A	20.8089	0	#N/A	22.0635	0	#N/A	22.3976	0	#N/A	19.1972	0	#N/A	16.9596	0	#N/A	20.627	0	#N/A	16.9596	0	#N/A	16.9596	0	#N/A	19.1972	0	#N/A	20.3612	0	#N/A	20.9088	0	#N/A	18.2191	0	#N/A	18.2191	0
methylethylsulfide	CSCC	8.78591	6.06659	7.39473	7.25693	7.31674	0.00357703	#N/A	8.80375	0	#N/A	10.0084	0	#N/A	11.5325	0	#N/A	11.6233	0	#N/A	8.80375	0	#N/A	8.65865	0	#N/A	9.18672	0	#N/A	8.65865	0	#N/A	8.65865	0	#N/A	8.80375	0	#N/A	10.4251	0	#N/A	10.0026	0	#N/A	8.73985	0	#N/A	8.73985	0
ethene	C=C	6.44681	6.41738	0.000865705	7.01161	7.22255	0.0444935	#N/A	8.98093	0	8.61476	9.36762	0.566803	#N/A	9.978	0	#N/A	9.0867	0	#N/A	8.98093	0	#N/A	9.33767	0	#N/A	8.11936	0	#N/A	9.33767	0	#N/A	9.33767	0	8.78591	8.98093	0.0380341	7.41668	9.54058	4.51098	7.93014	9.29126	1.85264	8.55771	8.6334	0.00572907	#N/A	8.6334	0
propene	CC=C	10.0981	9.71888	0.143799	10.931	10.8227	0.0117358	#N/A	12.4454	0	13.2359	12.9678	0.0718965	#N/A	13.4884	0	#N/A	12.6782	0	#N/A	12.4454	0	#N/A	12.1047	0	#N/A	11.9328	0	#N/A	12.1047	0	#N/A	12.1047	0	#N/A	12.4454	0	#N/A	12.8526	0	#N/A	12.9267	0	#N/A	11.7931	0	11.9808	11.7931	0.0352139
but-1-ene	C=CCC	13.6923	13.0204	0.451508	14.4853	14.4229	0.00390249	#N/A	15.9099	0	16.2026	16.5679	0.133485	#N/A	16.9987	0	#N/A	16.2696	0	#N/A	15.9099	0	#N/A	14.8716	0	#N/A	15.7462	0	#N/A	14.8716	0	#N/A	14.8716	0	#N/A	15.9099	0	#N/A	16.1646	0	#N/A	16.5621	0	#N/A	14.9529	0	#N/A	14.9529	0
pent-1-ene	CCCC=C	15.9744	16.3219	0.120759	18.6957	18.023	0.452524	#N/A	19.3744	0	#N/A	20.1681	0	#N/A	20.5091	0	#N/A	19.861	0	#N/A	19.3744	0	#N/A	17.6386	0	#N/A	19.5597	0	#N/A	17.6386	0	#N/A	17.6386	0	#N/A	19.3744	0	18.9981	19.4767	0.22902	19.6257	20.1975	0.32697	#N/A	18.1126	0	19.0552	18.1126	0.888396
hex-1-ene	CCCCC=C	19.3689	19.6234	0.0647443	21.2916	21.6232	0.109976	#N/A	22.8388	0	22.5923	23.7683	1.38281	#N/A	24.0194	0	#N/A	23.4525	0	#N/A	22.8388	0	#N/A	20.4056	0	#N/A	23.3731	0	20.4814	20.4056	0.00574852	20.5955	20.4056	0.0360703	#N/A	22.8388	0	#N/A	22.7887	0	#N/A	23.8329	0	#N/A	21.2723	0	#N/A	21.2723	0
hept-1-ene	CCCCCC=C	22.7635	22.9249	0.0260482	24.4351	25.2234	0.621351	#N/A	26.3033	0	#N/A	27.3684	0	#N/A	27.5298	0	#N/A	27.0439	0	#N/A	26.3033	0	#N/A	23.1726	0	#N/A	27.1865	0	22.8205	23.1726	0.123949	23.334	23.1726	0.0260493	#N/A	26.3033	0	#N/A	26.1007	0	#N/A	27.4683	0	#N/A	24.4321	0	#N/A	24.4321	0
oct-1-ene	CCCCCCC=C	26.0725	26.2264	0.0236902	28.4002	28.8235	0.179226	#N/A	29.7678	0	#N/A	30.9686	0	#N/A	31.0401	0	#N/A	30.6354	0	#N/A	29.7678	0	#N/A	25.9396	0	#N/A	31	0	26.9853	25.9396	1.09348	26.9282	25.9396	0.977419	#N/A	29.7678	0	#N/A	29.4128	0	#N/A	31.1037	0	#N/A	27.5918	0	#N/A	27.5918	0
non-1-ene	CCCCCCCC=C	29.3815	29.5279	0.0214444	31.8518	32.4237	0.327075	#N/A	33.2323	0	#N/A	34.5688	0	#N/A	34.5505	0	#N/A	34.2268	0	#N/A	33.2323	0	#N/A	28.7066	0	#N/A	34.8134	0	#N/A	28.7066	0	#N/A	28.7066	0	#N/A	33.2323	0	#N/A	32.7248	0	#N/A	34.7391	0	#N/A	30.7516	0	#N/A	30.7516	0
dec-1-ene	CCCCCCCCC=C	32.5193	32.8294	0.096172	35.2178	36.0238	0.649695	#N/A	36.6967	0	#N/A	38.1689	0	#N/A	38.0608	0	#N/A	37.8183	0	#N/A	36.6967	0	#N/A	31.4736	0	#N/A	38.6268	0	#N/A	31.4736	0	#N/A	31.4736	0	#N/A	36.6967	0	#N/A	36.0368	0	#N/A	38.3745	0	#N/A	33.9113	0	#N/A	33.9113	0
undec-1-ene	CCCCCCCCCC=C	#N/A	36.1309	0	38.6409	39.624	0.966518	#N/A	40.1612	0	#N/A	41.7691	0	#N/A	41.5712	0	#N/A	41.4097	0	#N/A	40.1612	0	#N/A	34.2406	0	#N/A	42.4402	0	#N/A	34.2406	0	#N/A	34.2406	0	#N/A	40.1612	0	#N/A	39.3488	0	#N/A	42.0099	0	#N/A	37.071	0	#N/A	37.071	0
dodec-1-ene	CCCCCCCCCCC=C	#N/A	39.4324	0	42.1324	43.2242	1.19189	#N/A	43.6257	0	#N/A	45.3692	0	#N/A	45.0815	0	#N/A	45.0012	0	#N/A	43.6257	0	#N/A	37.0076	0	#N/A	46.2537	0	#N/A	37.0076	0	#N/A	37.0076	0	#N/A	43.6257	0	#N/A	42.6609	0	#N/A	45.6453	0	#N/A	40.2308	0	#N/A	40.2308	0
n-methylformamide	CNC=O	-5.53398	-6.63169	1.20496	-21.1489	-25.287	17.1237	#N/A	-15.7157	0	#N/A	-20.9159	0	#N/A	-13.9155	0	#N/A	-11.2848	0	#N/A	-15.7157	0	#N/A	-12.5288	0	#N/A	-18.6637	0	#N/A	-12.5288	0	#N/A	-12.5288	0	#N/A	-15.7157	0	#N/A	-15.3614	0	#N/A	-19.098	0	-6.73206	-11.151	19.5274	#N/A	-11.151	0
n,n-dimethylformamide	CN(C)C=O	-5.76219	-5.58398	0.0317567	-14.588	-15.2184	0.397337	#N/A	-12.6233	0	#N/A	-10.7872	0	#N/A	-5.34914	0	#N/A	-2.66855	0	#N/A	-12.6233	0	#N/A	-10.1708	0	#N/A	-10.6623	0	#N/A	-10.1708	0	#N/A	-10.1708	0	-7.64488	-12.6233	24.7846	#N/A	-7.30543	0	#N/A	-10.2955	0	-5.81924	-9.53037	13.7724	-5.87629	-9.53037	13.3523
n,n-dibutylformamide	CCCCN(C=O)CCCC	#N/A	14.225	0	7.29117	6.38259	0.825506	#N/A	8.16354	0	#N/A	10.8138	0	#N/A	15.713	0	#N/A	18.8801	0	#N/A	8.16354	0	#N/A	6.43111	0	#N/A	12.2183	0	#N/A	6.43111	0	#N/A	6.43111	0	#N/A	8.16354	0	#N/A	12.5667	0	#N/A	11.517	0	#N/A	9.42806	0	#N/A	9.42806	0
n-methylacetamide	CNC(C)=O	-5.99039	-3.33019	7.0767	-22.2843	-21.6869	0.35689	#N/A	-12.2512	0	#N/A	-17.3157	0	#N/A	-10.4052	0	#N/A	-7.69332	0	#N/A	-12.2512	0	#N/A	-9.76181	0	#N/A	-14.8503	0	#N/A	-9.76181	0	#N/A	-9.76181	0	#N/A	-12.2512	0	#N/A	-12.0494	0	#N/A	-15.4626	0	#N/A	-7.99131	0	#N/A	-7.99131	0
n-ethylacetamide	CCNC(C)=O	#N/A	-0.0286857	0	-16.408	-18.0867	2.81812	#N/A	-8.78677	0	#N/A	-13.7155	0	#N/A	-6.8948	0	#N/A	-4.10187	0	#N/A	-8.78677	0	#N/A	-6.99482	0	#N/A	-11.0368	0	#N/A	-6.99482	0	#N/A	-6.99482	0	#N/A	-8.78677	0	#N/A	-8.73734	0	#N/A	-11.8272	0	#N/A	-4.83157	0	#N/A	-4.83157	0
n-butylacetamide	CCCCNC(C)=O	2.90962	6.57432	13.43	-11.3418	-10.8864	0.207423	#N/A	-1.85782	0	#N/A	-6.5152	0	#N/A	0.125913	0	#N/A	3.08103	0	#N/A	-1.85782	0	#N/A	-1.46084	0	#N/A	-3.40998	0	#N/A	-1.46084	0	#N/A	-1.46084	0	#N/A	-1.85782	0	#N/A	-2.11328	0	#N/A	-4.5564	0	#N/A	1.48791	0	#N/A	1.48791	0
methylethylether	CCOC	#N/A	2.62844	0	0.296667	0.845899	0.301656	#N/A	2.44959	0	#N/A	3.63196	0	#N/A	5.95045	0	#N/A	6.74771	0	#N/A	2.44959	0	#N/A	2.87996	0	#N/A	2.97764	0	#N/A	2.87996	0	#N/A	2.87996	0	#N/A	2.44959	0	#N/A	4.71523	0	#N/A	3.76952	0	#N/A	2.87815	0	#N/A	2.87815	0
methylcyclohexylether	COC1CCCCC1	#N/A	12.5329	0	8.16405	11.6464	12.1267	#N/A	12.843	0	#N/A	14.4325	0	#N/A	16.4815	0	#N/A	17.5221	0	#N/A	12.843	0	#N/A	11.1809	0	#N/A	14.4179	0	#N/A	11.1809	0	#N/A	11.1809	0	#N/A	12.843	0	#N/A	14.6513	0	#N/A	14.6757	0	#N/A	12.3574	0	#N/A	12.3574	0
undecan-1-ol	CCCCCCCCCCCO	26.9282	27.7647	0.699574	20.6982	19.7231	0.950896	#N/A	26.5237	0	#N/A	22.7397	0	#N/A	26.3037	0	#N/A	28.228	0	#N/A	26.5237	0	#N/A	21.9033	0	#N/A	25.9752	0	#N/A	21.9033	0	#N/A	21.9033	0	#N/A	26.5237	0	#N/A	23.6263	0	#N/A	24.4309	0	#N/A	26.1066	0	#N/A	26.1066	0
dodecan-1-ol	CCCCCCCCCCCCO	29.2674	31.0662	3.23568	23.8475	23.3233	0.274798	#N/A	29.9882	0	#N/A	26.3399	0	#N/A	29.8141	0	#N/A	31.8194	0	#N/A	29.9882	0	#N/A	24.6703	0	#N/A	29.7887	0	#N/A	24.6703	0	#N/A	24.6703	0	#N/A	29.9882	0	#N/A	26.9383	0	#N/A	28.0664	0	#N/A	29.2663	0	#N/A	29.2663	0
tridecan-1-ol	CCCCCCCCCCCCCO	33.2039	34.3677	1.35433	27.1393	26.9234	0.0466188	#N/A	33.4527	0	#N/A	29.94	0	#N/A	33.3244	0	#N/A	35.4109	0	#N/A	33.4527	0	#N/A	27.4373	0	#N/A	33.6021	0	#N/A	27.4373	0	#N/A	27.4373	0	#N/A	33.4527	0	#N/A	30.2503	0	#N/A	31.7018	0	#N/A	32.4261	0	#N/A	32.4261	0
tetradecan-1-ol	CCCCCCCCCCCCCCO	36.2847	37.6692	1.9168	30.6708	30.5236	0.021677	#N/A	36.9171	0	#N/A	33.5402	0	#N/A	36.8348	0	#N/A	39.0023	0	#N/A	36.9171	0	#N/A	30.2043	0	#N/A	37.4155	0	#N/A	30.2043	0	#N/A	30.2043	0	#N/A	36.9171	0	#N/A	33.5623	0	#N/A	35.3372	0	#N/A	35.5858	0	#N/A	35.5858	0
pentadecan-1-ol	CCCCCCCCCCCCCCCO	38.7379	40.9707	4.9853	34.2651	34.1237	0.0199672	#N/A	40.3816	0	#N/A	37.1404	0	#N/A	40.3451	0	#N/A	42.5937	0	39.5366	40.3816	0.714028	#N/A	32.9713	0	#N/A	41.229	0	#N/A	32.9713	0	#N/A	32.9713	0	#N/A	40.3816	0	#N/A	36.8744	0	#N/A	38.9726	0	#N/A	38.7456	0	#N/A	38.7456	0
hexadecan-1-ol	CCCCCCCCCCCCCCCCO	41.7616	44.2722	6.3029	37.8479	37.7239	0.0153683	45.0135	43.8461	1.36296	#N/A	40.7405	0	#N/A	43.8555	0	#N/A	46.1852	0	43.4161	43.8461	0.184884	#N/A	35.7383	0	#N/A	45.0424	0	#N/A	35.7383	0	#N/A	35.7383	0	#N/A	43.8461	0	#N/A	40.1864	0	#N/A	42.608	0	#N/A	41.9053	0	#N/A	41.9053	0
heptadecan-1-ol	CCCCCCCCCCCCCCCCCO	#N/A	47.5737	0	41.4421	41.3241	0.0139341	#N/A	47.3106	0	#N/A	44.3407	0	#N/A	47.3658	0	#N/A	49.7766	0	#N/A	47.3106	0	#N/A	38.5053	0	#N/A	48.8558	0	#N/A	38.5053	0	#N/A	38.5053	0	#N/A	47.3106	0	#N/A	43.4984	0	#N/A	46.2434	0	#N/A	45.065	0	#N/A	45.065	0
octadecan-1-ol	CCCCCCCCCCCCCCCCCCO	#N/A	50.8752	0	44.9679	44.9242	0.00190577	52.4873	50.775	2.93176	#N/A	47.9408	0	#N/A	50.8762	0	#N/A	53.3681	0	50.4905	50.775	0.0809737	#N/A	41.2722	0	#N/A	52.6693	0	#N/A	41.2722	0	#N/A	41.2722	0	#N/A	50.775	0	#N/A	46.8104	0	#N/A	49.8788	0	#N/A	48.2248	0	#N/A	48.2248	0
nonadecan-1-ol	CCCCCCCCCCCCCCCCCCCO	#N/A	54.1767	0	48.5108	48.5244	0.000185427	#N/A	54.2395	0	#N/A	51.541	0	#N/A	54.3865	0	#N/A	56.9595	0	#N/A	54.2395	0	#N/A	44.0392	0	#N/A	56.4827	0	#N/A	44.0392	0	#N/A	44.0392	0	#N/A	54.2395	0	#N/A	50.1225	0	#N/A	53.5142	0	#N/A	51.3845	0	#N/A	51.3845	0
eicosan-1-ol	CCCCCCCCCCCCCCCCCCCCO	#N/A	57.4782	0	52.0708	52.1246	0.00289165	#N/A	57.704	0	#N/A	55.1412	0	#N/A	57.8969	0	#N/A	60.551	0	#N/A	57.704	0	#N/A	46.8062	0	#N/A	60.2961	0	#N/A	46.8062	0	#N/A	46.8062	0	#N/A	57.704	0	#N/A	53.4345	0	#N/A	57.1496	0	#N/A	54.5442	0	#N/A	54.5442	0
adamantan-1-ol	OC12CC3CC(C1)CC(C2)C3	12.209	14.5586	5.52086	2.76129	5.32245	6.55955	#N/A	12.6658	0	#N/A	8.33906	0	#N/A	12.2623	0	#N/A	13.8622	0	#N/A	12.6658	0	#N/A	10.8354	0	#N/A	10.7215	0	#N/A	10.8354	0	#N/A	10.8354	0	#N/A	12.6658	0	#N/A	10.3781	0	#N/A	9.88931	0	#N/A	13.4677	0	#N/A	13.4677	0
propan-2-ol	CC(C)O	0.285257	1.35264	1.1393	-9.79002	-9.0782	0.50668	#N/A	-1.19208	0	-7.75899	-6.06159	2.88114	#N/A	-1.77915	0	-1.9968	-0.503636	2.22953	#N/A	-1.19208	0	#N/A	-0.232599	0	-5.30578	-4.53222	0.598396	#N/A	-0.232599	0	-1.36923	-0.232599	1.29194	-0.228205	-1.19208	0.929055	#N/A	-2.86997	0	#N/A	-4.65232	0	#N/A	0.828698	0	-0.855771	0.828698	2.83743
butan-2-ol	CCC(C)O	3.70834	4.65414	0.894536	-6.0018	-5.47804	0.274331	#N/A	2.27239	0	-3.08077	-2.46143	0.383585	#N/A	1.73121	0	1.71154	3.08781	1.89412	#N/A	2.27239	0	#N/A	2.53439	0	#N/A	-0.718786	0	#N/A	2.53439	0	#N/A	2.53439	0	#N/A	2.27239	0	#N/A	0.442061	0	-1.54039	-1.01691	0.274024	#N/A	3.98844	0	2.33911	3.98844	2.72029
pentan-2-ol	CCCC(C)O	7.13142	7.95564	0.679336	-2.16795	-1.87788	0.0841441	#N/A	5.73687	0	1.31218	1.13873	0.0300851	#N/A	5.24156	0	#N/A	6.67926	0	#N/A	5.73687	0	#N/A	5.30138	0	#N/A	3.09465	0	#N/A	5.30138	0	#N/A	5.30138	0	#N/A	5.73687	0	4.45001	3.75409	0.484303	#N/A	2.61849	0	#N/A	7.14817	0	#N/A	7.14817	0
2-methylbutan-2-ol	CCC(C)(C)O	5.07757	7.95564	8.28328	-3.41167	-1.87788	2.35253	#N/A	5.73687	0	-0.684616	1.13873	3.3246	#N/A	5.24156	0	2.39616	6.67926	18.345	#N/A	5.73687	0	#N/A	5.30138	0	#N/A	3.09465	0	#N/A	5.30138	0	#N/A	5.30138	0	#N/A	5.73687	0	#N/A	3.75409	0	#N/A	2.61849	0	#N/A	7.14817	0	#N/A	7.14817	0
2-methylpropan-2-ol	CC(C)(C)O	1.9968	4.65414	7.06146	-7.51367	-5.47804	4.14378	#N/A	2.27239	0	-3.9936	-2.46143	2.34753	#N/A	1.73121	0	0.0570514	3.08781	9.18551	#N/A	2.27239	0	#N/A	2.53439	0	-3.25193	-0.718786	6.41681	#N/A	2.53439	0	0.513462	2.53439	4.08415	#N/A	2.27239	0	#N/A	0.442061	0	#N/A	-1.01691	0	#N/A	3.98844	0	0.969873	3.98844	9.11172
2-methylpentan-2-ol	CCCC(C)(C)O	9.52758	11.2571	2.99139	-0.0570514	1.72229	3.16604	#N/A	9.20134	0	#N/A	4.73889	0	#N/A	8.75192	0	#N/A	10.2707	0	#N/A	9.20134	0	#N/A	8.06837	0	#N/A	6.90808	0	#N/A	8.06837	0	#N/A	8.06837	0	#N/A	9.20134	0	#N/A	7.06612	0	#N/A	6.2539	0	#N/A	10.3079	0	#N/A	10.3079	0
2-methylhexan-2-ol	CCCCC(C)(C)O	#N/A	14.5586	0	3.57142	5.32245	3.06612	#N/A	12.6658	0	#N/A	8.33906	0	#N/A	12.2623	0	#N/A	13.8622	0	#N/A	12.6658	0	#N/A	10.8354	0	#N/A	10.7215	0	#N/A	10.8354	0	#N/A	10.8354	0	#N/A	12.6658	0	#N/A	10.3781	0	#N/A	9.88931	0	#N/A	13.4677	0	#N/A	13.4677	0
cyclopentanol	OC1CCCC1	4.05065	4.65414	0.364201	-4.50135	-5.47804	0.953914	#N/A	2.27239	0	#N/A	-2.46143	0	#N/A	1.73121	0	#N/A	3.08781	0	#N/A	2.27239	0	#N/A	2.53439	0	#N/A	-0.718786	0	#N/A	2.53439	0	#N/A	2.53439	0	#N/A	2.27239	0	#N/A	0.442061	0	#N/A	-1.01691	0	3.25193	3.98844	0.542443	#N/A	3.98844	0
cyclohexanol	OC1CCCCC1	7.01732	7.95564	0.880447	-1.43769	-1.87788	0.19376	#N/A	5.73687	0	#N/A	1.13873	0	#N/A	5.24156	0	6.38975	6.67926	0.0838146	#N/A	5.73687	0	#N/A	5.30138	0	#N/A	3.09465	0	#N/A	5.30138	0	#N/A	5.30138	0	#N/A	5.73687	0	#N/A	3.75409	0	#N/A	2.61849	0	6.16155	7.14817	0.97343	#N/A	7.14817	0
cycloheptanol	OC1CCCCCC1	10.2692	11.2571	0.975937	2.20789	1.72229	0.235809	#N/A	9.20134	0	#N/A	4.73889	0	#N/A	8.75192	0	#N/A	10.2707	0	#N/A	9.20134	0	#N/A	8.06837	0	#N/A	6.90808	0	#N/A	8.06837	0	#N/A	8.06837	0	#N/A	9.20134	0	#N/A	7.06612	0	#N/A	6.2539	0	#N/A	10.3079	0	#N/A	10.3079	0
cyclooctanol	OC1CCCCCCC1	13.4641	14.5586	1.19798	7.09719	5.32245	3.14971	#N/A	12.6658	0	#N/A	8.33906	0	#N/A	12.2623	0	#N/A	13.8622	0	#N/A	12.6658	0	#N/A	10.8354	0	#N/A	10.7215	0	#N/A	10.8354	0	#N/A	10.8354	0	#N/A	12.6658	0	#N/A	10.3781	0	#N/A	9.88931	0	#N/A	13.4677	0	#N/A	13.4677	0
adamantane	C1C2CC3CC1CC(C2)C3	24.1898	26.5928	5.77455	27.4645	28.8013	1.78695	#N/A	29.9789	0	#N/A	30.1413	0	#N/A	29.8142	0	#N/A	29.3316	0	#N/A	29.9789	0	#N/A	25.6815	0	#N/A	30.5075	0	#N/A	25.6815	0	#N/A	25.6815	0	#N/A	29.9789	0	#N/A	28.428	0	#N/A	30.5633	0	#N/A	27.168	0	#N/A	27.168	0
cyclohexylmethylketone	CC(=O)C1CCCCC1	#N/A	12.2264	0	7.64488	9.00947	1.86209	#N/A	11.2463	0	#N/A	12.1428	0	#N/A	15.2767	0	#N/A	16.8593	0	#N/A	11.2463	0	#N/A	9.57305	0	#N/A	13.1816	0	#N/A	9.57305	0	#N/A	9.57305	0	#N/A	11.2463	0	#N/A	13.1945	0	#N/A	12.9014	0	#N/A	11.5055	0	#N/A	11.5055	0
2-methylcyclohexanone	CC1CCCCC1=O	7.47373	8.92491	2.10593	5.61956	5.40931	0.0442073	#N/A	7.78185	0	#N/A	8.54268	0	#N/A	11.7664	0	#N/A	13.2679	0	#N/A	7.78185	0	#N/A	6.80606	0	#N/A	9.36817	0	#N/A	6.80606	0	#N/A	6.80606	0	#N/A	7.78185	0	#N/A	9.88252	0	#N/A	9.26598	0	#N/A	8.34572	0	#N/A	8.34572	0
cyclopropane	C1CC1	9.81284	10.0853	0.0742375	10.6344	10.8005	0.0275931	#N/A	12.6566	0	#N/A	12.1405	0	#N/A	12.2624	0	#N/A	11.3743	0	#N/A	12.6566	0	#N/A	11.8466	0	#N/A	11.4403	0	#N/A	11.8466	0	#N/A	11.8466	0	#N/A	12.6566	0	#N/A	11.8679	0	#N/A	12.3862	0	#N/A	11.3693	0	#N/A	11.3693	0
propylcyclopentane	CCCC1CCCC1	25.1597	26.5928	2.05394	30.5967	28.8013	3.22329	#N/A	29.9789	0	#N/A	30.1413	0	#N/A	29.8142	0	#N/A	29.3316	0	#N/A	29.9789	0	#N/A	25.6815	0	#N/A	30.5075	0	#N/A	25.6815	0	#N/A	25.6815	0	#N/A	29.9789	0	#N/A	28.428	0	#N/A	30.5633	0	#N/A	27.168	0	#N/A	27.168	0
pentylcyclopentane	CCCCCC1CCCC1	31.2642	33.1958	3.73132	36.9122	36.0016	0.829216	#N/A	36.9079	0	#N/A	37.3416	0	#N/A	36.8349	0	#N/A	36.5145	0	#N/A	36.9079	0	#N/A	31.2155	0	#N/A	38.1343	0	#N/A	31.2155	0	#N/A	31.2155	0	#N/A	36.9079	0	#N/A	35.0521	0	#N/A	37.8341	0	#N/A	33.4874	0	#N/A	33.4874	0
propylcyclohexane	CCCC1CCCCC1	#N/A	29.8943	0	32.137	32.4015	0.0699203	#N/A	33.4434	0	#N/A	33.7415	0	#N/A	33.3245	0	#N/A	32.923	0	#N/A	33.4434	0	#N/A	28.4485	0	#N/A	34.3209	0	#N/A	28.4485	0	#N/A	28.4485	0	#N/A	33.4434	0	#N/A	31.74	0	#N/A	34.1987	0	#N/A	30.3277	0	#N/A	30.3277	0
butylcyclohexane	CCCCC1CCCCC1	#N/A	33.1958	0	35.6343	36.0016	0.134937	#N/A	36.9079	0	#N/A	37.3416	0	#N/A	36.8349	0	#N/A	36.5145	0	#N/A	36.9079	0	#N/A	31.2155	0	#N/A	38.1343	0	#N/A	31.2155	0	#N/A	31.2155	0	#N/A	36.9079	0	#N/A	35.0521	0	#N/A	37.8341	0	#N/A	33.4874	0	#N/A	33.4874	0
t-butylcyclohexane	CC(C)(C)C1CCCCC1	28.7539	33.1958	19.7307	33.5633	36.0016	5.94532	#N/A	36.9079	0	#N/A	37.3416	0	#N/A	36.8349	0	#N/A	36.5145	0	#N/A	36.9079	0	#N/A	31.2155	0	#N/A	38.1343	0	#N/A	31.2155	0	#N/A	31.2155	0	#N/A	36.9079	0	#N/A	35.0521	0	#N/A	37.8341	0	#N/A	33.4874	0	#N/A	33.4874	0
2-methylpyridine	Cc1ccccn1	6.38975	7.58643	1.43204	0.125513	0.251016	0.015751	#N/A	2.70462	0	#N/A	4.58302	0	#N/A	7.95243	0	9.81284	8.4061	1.9789	#N/A	2.70462	0	#N/A	4.27367	0	5.13462	4.18876	0.894655	#N/A	4.27367	0	#N/A	4.27367	0	#N/A	2.70462	0	#N/A	6.56636	0	#N/A	4.69753	0	#N/A	4.86107	0	#N/A	4.86107	0
3-methylpyridine	Cc1cccnc1	6.84617	7.58643	0.547997	0.747373	0.251016	0.24637	#N/A	2.70462	0	#N/A	4.58302	0	#N/A	7.95243	0	10.7827	8.4061	5.64827	#N/A	2.70462	0	#N/A	4.27367	0	#N/A	4.18876	0	#N/A	4.27367	0	#N/A	4.27367	0	#N/A	2.70462	0	#N/A	6.56636	0	#N/A	4.69753	0	#N/A	4.86107	0	#N/A	4.86107	0
4-methylpyridine	Cc1ccncc1	6.96027	7.58643	0.392084	0.114103	0.251016	0.0187453	#N/A	2.70462	0	4.79232	4.58302	0.0438061	#N/A	7.95243	0	#N/A	8.4061	0	#N/A	2.70462	0	#N/A	4.27367	0	#N/A	4.18876	0	#N/A	4.27367	0	#N/A	4.27367	0	#N/A	2.70462	0	#N/A	6.56636	0	#N/A	4.69753	0	#N/A	4.86107	0	#N/A	4.86107	0
2,3-dimethylpyridine	Cc1cccnc1C	9.47053	9.85635	0.148855	2.88109	3.25122	0.136993	#N/A	5.184	0	#N/A	7.87522	0	#N/A	11.276	0	#N/A	11.9863	0	#N/A	5.184	0	#N/A	6.27777	0	#N/A	7.33053	0	#N/A	6.27777	0	#N/A	6.27777	0	#N/A	5.184	0	#N/A	9.54589	0	#N/A	7.79327	0	#N/A	7.19611	0	#N/A	7.19611	0
2,4-dimethylpyridine	Cc1ccnc(C)c1	9.47053	9.85635	0.148855	2.48744	3.25122	0.583359	#N/A	5.184	0	#N/A	7.87522	0	#N/A	11.276	0	#N/A	11.9863	0	#N/A	5.184	0	#N/A	6.27777	0	#N/A	7.33053	0	#N/A	6.27777	0	#N/A	6.27777	0	#N/A	5.184	0	#N/A	9.54589	0	#N/A	7.79327	0	#N/A	7.19611	0	#N/A	7.19611	0
2,5-dimethylpyridine	Cc1ccc(C)nc1	9.47053	9.85635	0.148855	3.0009	3.25122	0.0626587	#N/A	5.184	0	#N/A	7.87522	0	#N/A	11.276	0	#N/A	11.9863	0	#N/A	5.184	0	#N/A	6.27777	0	#N/A	7.33053	0	#N/A	6.27777	0	#N/A	6.27777	0	#N/A	5.184	0	#N/A	9.54589	0	#N/A	7.79327	0	#N/A	7.19611	0	#N/A	7.19611	0
2,6-dimethylpyridine	Cc1cccc(C)n1	9.58463	9.85635	0.0738288	2.225	3.25122	1.05312	#N/A	5.184	0	#N/A	7.87522	0	#N/A	11.276	0	13.1789	11.9863	1.42226	#N/A	5.184	0	#N/A	6.27777	0	7.53078	7.33053	0.0400989	#N/A	6.27777	0	#N/A	6.27777	0	#N/A	5.184	0	#N/A	9.54589	0	#N/A	7.79327	0	#N/A	7.19611	0	#N/A	7.19611	0
3,4-dimethylpyridine	Cc1cnccc1C	9.47053	9.85635	0.148855	2.7784	3.25122	0.223556	#N/A	5.184	0	#N/A	7.87522	0	#N/A	11.276	0	#N/A	11.9863	0	#N/A	5.184	0	#N/A	6.27777	0	#N/A	7.33053	0	#N/A	6.27777	0	#N/A	6.27777	0	#N/A	5.184	0	#N/A	9.54589	0	#N/A	7.79327	0	#N/A	7.19611	0	#N/A	7.19611	0
3,5-dimethylpyridine	Cc1cncc(C)c1	10.1551	9.85635	0.0892809	3.78821	3.25122	0.28836	#N/A	5.184	0	#N/A	7.87522	0	#N/A	11.276	0	#N/A	11.9863	0	#N/A	5.184	0	#N/A	6.27777	0	#N/A	7.33053	0	#N/A	6.27777	0	#N/A	6.27777	0	#N/A	5.184	0	#N/A	9.54589	0	#N/A	7.79327	0	#N/A	7.19611	0	#N/A	7.19611	0
quinoline	c1ccc2ncccc2c1	11.5814	13.0094	2.03904	7.17136	5.2873	3.54967	#N/A	8.31286	0	#N/A	10.5113	0	#N/A	14.0246	0	15.8603	13.7792	4.33085	#N/A	8.31286	0	#N/A	9.98987	0	#N/A	10.3711	0	#N/A	9.98987	0	#N/A	9.98987	0	#N/A	8.31286	0	#N/A	12.5948	0	#N/A	10.6038	0	#N/A	11.177	0	#N/A	11.177	0
isoquinoline	c1ccc2cnccc2c1	11.8667	13.0094	1.30574	9.55611	5.2873	18.2227	#N/A	8.31286	0	#N/A	10.5113	0	#N/A	14.0246	0	17.0013	13.7792	10.3819	#N/A	8.31286	0	#N/A	9.98987	0	#N/A	10.3711	0	#N/A	9.98987	0	#N/A	9.98987	0	#N/A	8.31286	0	#N/A	12.5948	0	#N/A	10.6038	0	#N/A	11.177	0	#N/A	11.177	0
propylbenzene	CCCc1ccccc1	21.1375	21.7064	0.323576	21.9077	22.9333	1.05188	#N/A	25.4912	0	#N/A	25.7653	0	#N/A	26.676	0	#N/A	25.6273	0	#N/A	25.4912	0	#N/A	23.3418	0	#N/A	26.3517	0	#N/A	23.3418	0	#N/A	23.3418	0	25.559	25.4912	0.0046	#N/A	25.5034	0	#N/A	26.2714	0	#N/A	24.9318	0	#N/A	24.9318	0
butylbenzene	CCCCc1ccccc1	24.3039	25.0079	0.495599	25.3308	26.5335	1.44647	#N/A	28.9557	0	#N/A	29.3655	0	#N/A	30.1863	0	#N/A	29.2187	0	#N/A	28.9557	0	#N/A	26.1088	0	#N/A	30.1651	0	#N/A	26.1088	0	#N/A	26.1088	0	29.0391	28.9557	0.00696949	#N/A	28.8155	0	#N/A	29.9068	0	#N/A	28.0915	0	#N/A	28.0915	0
pentylbenzene	CCCCCc1ccccc1	27.9552	28.3094	0.125459	28.868	30.1337	1.60192	#N/A	32.4201	0	#N/A	32.9657	0	#N/A	33.6967	0	#N/A	32.8102	0	#N/A	32.4201	0	#N/A	28.8758	0	#N/A	33.9785	0	#N/A	28.8758	0	#N/A	28.8758	0	#N/A	32.4201	0	#N/A	32.1275	0	#N/A	33.5422	0	#N/A	31.2512	0	#N/A	31.2512	0
hexylbenzene	CCCCCCc1ccccc1	31.4924	31.6109	0.0140469	32.4622	33.7338	1.61696	#N/A	35.8846	0	#N/A	36.5658	0	#N/A	37.207	0	#N/A	36.4016	0	#N/A	35.8846	0	#N/A	31.6428	0	#N/A	37.792	0	#N/A	31.6428	0	#N/A	31.6428	0	#N/A	35.8846	0	#N/A	35.4395	0	#N/A	37.1776	0	#N/A	34.411	0	#N/A	34.411	0
isopropylbenzene	CC(C)c1ccccc1	20.8808	21.7064	0.681563	22.0447	22.9333	0.789771	#N/A	25.4912	0	#N/A	25.7653	0	#N/A	26.676	0	#N/A	25.6273	0	#N/A	25.4912	0	#N/A	23.3418	0	#N/A	26.3517	0	#N/A	23.3418	0	#N/A	23.3418	0	25.9584	25.4912	0.21826	#N/A	25.5034	0	#N/A	26.2714	0	23.3911	24.9318	2.37374	#N/A	24.9318	0
tert-butylbenzene	CC(C)(C)c1ccccc1	23.4481	25.0079	2.43285	23.3511	26.5335	10.1275	#N/A	28.9557	0	#N/A	29.3655	0	#N/A	30.1863	0	#N/A	29.2187	0	#N/A	28.9557	0	#N/A	26.1088	0	#N/A	30.1651	0	#N/A	26.1088	0	#N/A	26.1088	0	27.2135	28.9557	3.03512	#N/A	28.8155	0	#N/A	29.9068	0	#N/A	28.0915	0	#N/A	28.0915	0
1,3-dichlorobenzene	[Cl]c1cccc([Cl])c1	20.5385	20.8774	0.114842	21.052	19.5526	2.24812	#N/A	24.2318	0	21.8507	22.4751	0.389892	#N/A	23.6377	0	22.0789	21.6153	0.214935	#N/A	24.2318	0	#N/A	23.1871	0	#N/A	23.7838	0	#N/A	23.1871	0	#N/A	23.1871	0	#N/A	24.2318	0	#N/A	23.1376	0	#N/A	23.4955	0	#N/A	24.7393	0	#N/A	24.7393	0
1,4-dichlorobenzene	[Cl]c1ccc([Cl])cc1	19.3404	20.8774	2.36225	21.0805	19.5526	2.33447	#N/A	24.2318	0	22.0218	22.4751	0.205444	#N/A	23.6377	0	22.193	21.6153	0.333753	#N/A	24.2318	0	#N/A	23.1871	0	#N/A	23.7838	0	#N/A	23.1871	0	#N/A	23.1871	0	#N/A	24.2318	0	#N/A	23.1376	0	#N/A	23.4955	0	#N/A	24.7393	0	#N/A	24.7393	0
fluoranthene	c1ccc2c(c1)c3cccc4cccc2c34	29.4385	29.404	0.00118889	30.7336	30.3543	0.143848	32.2169	33.5733	1.83969	33.261	35.95	7.23081	#N/A	37.5232	0	34.9154	35.0725	0.0246773	30.8591	33.5733	7.36674	30.2943	32.8374	6.46725	34.3449	36.1327	3.19621	#N/A	32.8374	0	#N/A	32.8374	0	#N/A	33.5733	0	34.6872	36.1334	2.09129	#N/A	35.8582	0	#N/A	35.3379	0	#N/A	35.3379	0
coronene	c1cc2ccc3ccc4ccc5ccc6ccc1c7c2c3c4c5c67	#N/A	34.6153	0	37.3686	37.4918	0.0151728	#N/A	39.9451	0	#N/A	47.1644	0	#N/A	50.4584	0	#N/A	47.9505	0	#N/A	39.9451	0	#N/A	40.6081	0	#N/A	46.279	0	#N/A	40.6081	0	#N/A	40.6081	0	#N/A	39.9451	0	#N/A	47.799	0	#N/A	45.8502	0	#N/A	44.6195	0	#N/A	44.6195	0
acenaphthene	C1Cc2cccc3cccc1c23	22.3641	24.5339	4.70795	23.7277	25.7378	4.04055	26.0154	28.233	4.91772	27.0994	29.8482	7.55601	#N/A	30.8397	0	27.9552	29.0656	1.23308	25.2167	28.233	9.09814	23.7904	27.0104	10.3681	#N/A	29.748	0	25.6731	27.0104	1.78826	26.3007	27.0104	0.503664	28.0693	28.233	0.0268119	27.727	29.6292	3.61859	#N/A	29.8336	0	#N/A	28.6837	0	#N/A	28.6837	0
fluorene	C1c2ccccc2c2ccccc12	23.8475	22.5353	1.7218	25.5134	23.6256	3.56359	#N/A	26.6578	0	#N/A	28.2136	0	#N/A	29.8745	0	#N/A	28.2118	0	#N/A	26.6578	0	26.643	25.8801	0.582052	#N/A	28.506	0	#N/A	25.8801	0	#N/A	25.8801	0	#N/A	26.6578	0	#N/A	28.5859	0	#N/A	28.3756	0	#N/A	27.8427	0	#N/A	27.8427	0
indane	C1Cc2ccccc2C1	18.5702	18.4954	0.00559737	20.0821	19.7732	0.095397	#N/A	22.0816	0	#N/A	22.8172	0	#N/A	23.7788	0	#N/A	22.7045	0	#N/A	22.0816	0	#N/A	20.7211	0	#N/A	22.8266	0	#N/A	20.7211	0	#N/A	20.7211	0	#N/A	22.0816	0	#N/A	22.6989	0	#N/A	23.0563	0	#N/A	21.8565	0	#N/A	21.8565	0
fluoroethane	CCF	#N/A	6.55888	0	5.9961	4.64631	1.82194	#N/A	8.99927	0	#N/A	6.32631	0	#N/A	7.61162	0	#N/A	7.17314	0	#N/A	8.99927	0	#N/A	8.82558	0	#N/A	6.47206	0	#N/A	8.82558	0	#N/A	8.82558	0	9.18527	8.99927	0.0345969	#N/A	7.16795	0	#N/A	7.05544	0	#N/A	9.05938	0	#N/A	9.05938	0
1-fluoropropane	CCCF	#N/A	9.86038	0	8.50636	8.24647	0.0675432	#N/A	12.4637	0	#N/A	9.92647	0	#N/A	11.122	0	#N/A	10.7646	0	#N/A	12.4637	0	#N/A	11.5926	0	#N/A	10.2855	0	#N/A	11.5926	0	#N/A	11.5926	0	#N/A	12.4637	0	#N/A	10.48	0	#N/A	10.6908	0	#N/A	12.2191	0	#N/A	12.2191	0
2-fluoropropane	CC(C)F	#N/A	8.84236	0	8.63758	8.64147	1.51413e-05	#N/A	11.5636	0	#N/A	10.4015	0	#N/A	11.357	0	#N/A	11.1696	0	#N/A	11.5636	0	#N/A	10.7485	0	#N/A	10.0605	0	#N/A	10.7485	0	#N/A	10.7485	0	#N/A	11.5636	0	#N/A	10.575	0	#N/A	10.7658	0	#N/A	11.0088	0	#N/A	11.0088	0
1-fluorobutane	CCCCF	13.0648	13.1619	0.00943254	11.7697	11.8466	0.00591874	#N/A	15.9282	0	#N/A	13.5266	0	#N/A	14.6323	0	#N/A	14.356	0	#N/A	15.9282	0	#N/A	14.3596	0	#N/A	14.0989	0	#N/A	14.3596	0	#N/A	14.3596	0	#N/A	15.9282	0	#N/A	13.792	0	#N/A	14.3263	0	#N/A	15.3789	0	#N/A	15.3789	0
1-fluoropentane	CCCCCF	13.293	16.4634	10.0516	15.1186	15.4468	0.107702	#N/A	19.3927	0	#N/A	17.1268	0	#N/A	18.1427	0	#N/A	17.9475	0	#N/A	19.3927	0	#N/A	17.1266	0	#N/A	17.9124	0	#N/A	17.1266	0	#N/A	17.1266	0	#N/A	19.3927	0	#N/A	17.104	0	#N/A	17.9617	0	#N/A	18.5386	0	#N/A	18.5386	0
fluorobenzene	Fc1ccccc1	12.9507	13.4062	0.207496	12.5399	12.997	0.208916	#N/A	16.6018	0	11.8667	15.6924	14.6364	#N/A	16.8533	0	16.2596	15.3248	0.87396	#N/A	16.6018	0	#N/A	16.3837	0	#N/A	16.0832	0	#N/A	16.3837	0	#N/A	16.3837	0	17.2866	16.6018	0.468879	#N/A	16.4075	0	#N/A	16.3466	0	#N/A	16.992	0	#N/A	16.992	0
1,2-difluorobenzene	Fc1ccccc1F	13.5212	13.6719	0.0227143	13.5383	13.0011	0.288556	#N/A	16.8608	0	#N/A	15.8721	0	#N/A	17.1749	0	#N/A	15.6154	0	#N/A	16.8608	0	#N/A	16.7365	0	#N/A	16.3434	0	#N/A	16.7365	0	#N/A	16.7365	0	#N/A	16.8608	0	#N/A	16.7051	0	#N/A	16.5484	0	#N/A	17.4797	0	#N/A	17.4797	0
o-fluorochlorobenzene	Fc1ccccc1[Cl]	#N/A	17.2746	0	16.6761	16.2769	0.159413	#N/A	20.5463	0	#N/A	19.1736	0	#N/A	20.4063	0	#N/A	18.6153	0	#N/A	20.5463	0	#N/A	19.9618	0	#N/A	20.0636	0	#N/A	19.9618	0	#N/A	19.9618	0	#N/A	20.5463	0	#N/A	19.9213	0	#N/A	20.022	0	#N/A	21.1095	0	#N/A	21.1095	0
m-fluorochlorobenzene	Fc1cccc([Cl])c1	#N/A	17.2746	0	16.4536	16.2769	0.031246	#N/A	20.5463	0	#N/A	19.1736	0	#N/A	20.4063	0	#N/A	18.6153	0	#N/A	20.5463	0	#N/A	19.9618	0	#N/A	20.0636	0	#N/A	19.9618	0	#N/A	19.9618	0	#N/A	20.5463	0	#N/A	19.9213	0	#N/A	20.022	0	#N/A	21.1095	0	#N/A	21.1095	0
p-fluorochlorobenzene	Fc1ccc([Cl])cc1	#N/A	17.2746	0	16.6875	16.2769	0.168655	#N/A	20.5463	0	#N/A	19.1736	0	#N/A	20.4063	0	#N/A	18.6153	0	#N/A	20.5463	0	#N/A	19.9618	0	#N/A	20.0636	0	#N/A	19.9618	0	#N/A	19.9618	0	#N/A	20.5463	0	#N/A	19.9213	0	#N/A	20.022	0	#N/A	21.1095	0	#N/A	21.1095	0
3-fluorophenol	Oc1cccc(F)c1	11.0109	9.33059	2.8235	-4.21039	-4.90091	0.476821	#N/A	9.75736	0	#N/A	-0.753444	0	#N/A	4.32282	0	#N/A	3.88497	0	#N/A	9.75736	0	#N/A	11.0085	0	#N/A	2.74625	0	#N/A	11.0085	0	#N/A	11.0085	0	#N/A	9.75736	0	#N/A	3.75198	0	#N/A	1.60561	0	#N/A	13.4121	0	#N/A	13.4121	0
4-fluorophenol	Oc1ccc(F)cc1	10.0981	9.33059	0.589065	-3.97078	-4.90091	0.865156	#N/A	9.75736	0	-1.48334	-0.753444	0.532742	#N/A	4.32282	0	#N/A	3.88497	0	#N/A	9.75736	0	#N/A	11.0085	0	#N/A	2.74625	0	#N/A	11.0085	0	#N/A	11.0085	0	#N/A	9.75736	0	4.05065	3.75198	0.0892038	#N/A	1.60561	0	#N/A	13.4121	0	#N/A	13.4121	0
cis-but-2-ene	CC=CC	13.293	13.0204	0.0743018	15.5579	14.4229	1.28831	#N/A	15.9099	0	#N/A	16.5679	0	#N/A	16.9987	0	#N/A	16.2696	0	#N/A	15.9099	0	#N/A	14.8716	0	#N/A	15.7462	0	#N/A	14.8716	0	#N/A	14.8716	0	#N/A	15.9099	0	#N/A	16.1646	0	#N/A	16.5621	0	#N/A	14.9529	0	#N/A	14.9529	0
trans-but-2-ene	CC=CC	13.1789	13.0204	0.0251162	15.0844	14.4229	0.437595	#N/A	15.9099	0	#N/A	16.5679	0	#N/A	16.9987	0	#N/A	16.2696	0	#N/A	15.9099	0	#N/A	14.8716	0	#N/A	15.7462	0	#N/A	14.8716	0	#N/A	14.8716	0	#N/A	15.9099	0	#N/A	16.1646	0	#N/A	16.5621	0	15.9173	14.9529	0.930184	#N/A	14.9529	0
2-methylbut-2-ene	CC=C(C)C	15.2327	16.3219	1.18629	18.1937	18.023	0.0291203	#N/A	19.3744	0	19.0552	20.1681	1.23866	#N/A	20.5091	0	#N/A	19.861	0	#N/A	19.3744	0	#N/A	17.6386	0	#N/A	19.5597	0	#N/A	17.6386	0	#N/A	17.6386	0	#N/A	19.3744	0	#N/A	19.4767	0	#N/A	20.1975	0	#N/A	18.1126	0	#N/A	18.1126	0
2,2-dimethylpropane	CC(C)(C)C	#N/A	19.9898	0	20.8808	21.601	0.518649	#N/A	23.05	0	#N/A	22.941	0	#N/A	22.7935	0	#N/A	22.1487	0	#N/A	23.05	0	#N/A	20.1476	0	#N/A	22.8806	0	#N/A	20.1476	0	#N/A	20.1476	0	#N/A	23.05	0	#N/A	21.804	0	#N/A	23.2925	0	#N/A	20.8485	0	#N/A	20.8485	0
[truncated: 57 more columns]

## Sheet: 2 Validation set expt. v calc.
	Solvent	No. of data points	rmsd
	Hexadecane	84	1.54899
	Octanol (wet)	84	1.66239
			n	rmsd		n	rmsd
			84	1.57616		84	1.66239
		Expt.			Expt.
Solute name	SMILES	Water-> Hexadecane	Calculated	Diff^2	Water-> octanol (wet)	Calculated	Diff^2
2-Methylpropane	CC(C)C	17.7373	18.0008	0.0694538	15.7462	16.6883	0.887603
2,2-Dimethylbutane	CCC(C)(C)C	23.9159	25.2011	1.65174	21.7936	23.2913	2.24306
2,3-Dimethylbutane	CC(C(C)C)C	24.0472	25.2011	1.33168	21.9648	23.2913	1.75969
2-Methylhexane	CCCCC(C)C	29.3872	28.8013	0.343234	24.3039	26.5928	5.23919
2,3-Dimethylpentane	CCC(C(C)C)C	27.7612	28.8013	1.08181	24.3039	26.5928	5.23919
2,4-Dimethylpentane	CC(CC(C)C)C	27.8924	28.8013	0.82607	24.3039	26.5928	5.23919
3,3-Dimethylpentane	CCC(CC)(C)C	27.533	28.8013	1.6086	24.3039	26.5928	5.23919
2,2,3-Trimethylbutane	CC(C(C)(C)C)C	27.6015	28.8013	1.43963	24.3039	26.5928	5.23919
2-Methylprop-1-ene	CC(C)=C	13.9148	14.4229	0.258109	13.35	13.0204	0.108659
cis-Pent-2-ene	CC\C=C/C	18.1252	18.023	0.0104418	15.8603	16.3219	0.213081
3-Methylbut-1-ene	CC(C=C)C	18.6729	18.023	0.422342	15.8032	16.3219	0.269006
t-Hept-2-ene	CCCC\C=C\C	25.1597	25.2234	0.00405844	21.9077	22.9249	1.03463
t-Oct-2-ene	CCCCC\C=C\C	28.5257	28.8235	0.0887071	25.7302	26.2264	0.24624
Buta-1,3-diene	C=CC=C	11.3703	10.8449	0.276049	11.3532	9.35247	4.00303
2-Methylbuta-1,3-diene	C=C(C=C)C	14.8391	14.4451	0.155208	13.9776	12.654	1.75196
2,3-Dimethylbuta-1,3-diene	CC(C(C)=C)=C	17.0013	18.0453	1.08983	16.3737	15.9555	0.174952
c-Penta-1,3-diene	C=C\C=C/C	14.9246	14.4451	0.229961	13.9205	12.654	1.60419
Penta-1,4-diene	C=CCC=C	15.4849	14.4451	1.08116	14.1487	12.654	2.23434
Hexa-1,5-diene	C=CCCC=C	18.0739	18.0453	0.000818831	16.3737	15.9555	0.174952
Cyclopentene	C1CC=CC1	15.3069	14.4229	0.781473	12.7795	13.0204	0.0580226
Cyclohexene	C1CCC=CC1	18.382	18.023	0.128821	16.3167	16.3219	2.69956e-05
1-Methylcyclohexene	CC1=CCCCC1	22.6665	21.6232	1.0885	19.2263	19.6234	0.157671
Cycloheptene	C1CCC=CCC1	23.9388	21.6232	5.36181	19.0552	19.6234	0.322887
Cyclohexa-1,4-diene	C1C=CCC=C1	13.9377	14.4451	0.257502	13.1218	12.654	0.218881
2-Chloropropane	CC([Cl])C	10.2122	12.4748	5.11925	10.8398	11.9062	1.13738
1,2-Dichloropropane	CC(C[Cl])[Cl]	10.874	9.40089	2.17002	11.5244	10.1612	1.85836
1,4-Dichlorobutane	[Cl]CCCC[Cl]	10.275	11.8531	2.49041	12.7795	13.1981	0.175258
3-Chloroprop-1-ene	[Cl]CC=C	9.63598	7.74883	3.56131	10.4975	7.9738	6.3688
Diisopropylether	CC(OC(C)C)C	8.04995	11.6464	12.9344	8.67181	12.5329	14.9084
Methyl-tert-butylether	COC(C)(C)C	5.26014	8.04622	7.76229	5.99039	9.23144	10.5044
2-Methyltetrahydrofuran	CC1CCCO1	2.28205	4.44606	4.68293	5.84777	5.92994	0.0067524
2,5-Dimethyltetrahydrofuran	CC1CCC(O1)C	4.79232	8.04622	10.5879	7.30258	9.23144	3.72052
3-Methylbutan-2-one	CC(C(C)=O)C	1.78	1.80914	0.000849119	3.9936	5.62341	2.65629
3,3-Dimethylbutan-2-one	CC(C(C)(C)C)=O	3.69693	5.40931	2.93223	6.84616	8.92491	4.32119
Heptan-2-one	CCCCCC(C)=O	8.72886	9.00947	0.0787406	11.2962	12.2264	0.86535
5-Methylhexan-2-one	CC(CCC(C)=O)C	7.29117	9.00947	2.95256	10.7257	12.2264	2.25227
2,4-Dimethylpentan-3-one	CC(C(C(C)C)=O)C	7.94726	9.00947	1.12829	11.2391	12.2264	0.974748
Octan-2-one	CCCCCCC(C)=O	12.2489	12.6096	0.130105	13.5212	15.5279	4.02701
Nonan-2-one	CCCCCCCC(C)=O	16.5734	16.2098	0.132228	18.0282	18.8294	0.641896
Nonan-5-one	CCCCC(CCCC)=O	15.7348	16.2098	0.225648	16.4308	18.8294	5.75339
2,2,4,4-Tetramethylpentan-3-one	CC(C(C(C)(C)C)=O)(C)C	14.6622	16.2098	2.39503	17.1154	18.8294	2.93782
Decan-2-one	CCCCCCCCC(C)=O	20.1106	19.81	0.0903927	21.5084	22.1309	0.387571
Undecan-2-one	CCCCCCCCCC(C)=O	23.6877	23.4101	0.0770686	23.334	25.4324	4.40333
Methylcyclopropylketone	CC(C1CC1)=O	-1.38635	-1.79102	0.163759	2.79552	2.32191	0.224306
Allyl cyanide	C=CCC#N	-1.2209	-3.16508	3.77983	2.28205	-0.263111	6.47787
1,4-Dicyanobutane	N#CCCCCC#N	-9.68162	-9.97476	0.0859346	-1.82564	-3.27568	2.10262
Dimethylamine	CNC	-8.84296	-10.4543	2.59634	-2.16795	-1.32713	0.706988
Diisopropylamine	CC(NC(C)C)C	3.04084	3.94637	0.819988	7.30258	11.8789	20.9426
Methylethylamine	CCNC	-3.93084	-6.85412	8.54555	0.855771	1.97438	1.25128
2-Methylpropan-1-ol	CC(CO)C	-5.06046	-5.47804	0.174375	4.3359	4.65414	0.101273
Pentan-3-ol	CCC(CC)O	-1.8827	-1.87788	2.32249e-05	6.90322	7.95564	1.1076
2-Methylbutan-1-ol	CCC(CO)C	-1.30648	-1.87788	0.326498	7.47373	7.95564	0.232238
3-Methylbutan-1-ol	CC(CCO)C	-1.30648	-1.87788	0.326498	7.30258	7.95564	0.426493
3-Methylbutan-2-ol	CC(C(O)C)C	-2.09379	-1.87788	0.0466168	7.30258	7.95564	0.426493
Hexan-3-ol	CCCC(CC)O	2.07096	1.72229	0.121577	9.41348	11.2571	3.3991
4-Methylpentan-2-ol	CC(CC(O)C)C	1.72866	1.72229	4.05786e-05	10.0981	11.2571	1.3434
2-Methylpentan-3-ol	CCC(C(C)C)O	-0.370834	1.72229	4.38115	10.2122	11.2571	1.09191
2,3-Dimethylbutan-2-ol	CC(C(O)(C)C)C	-0.21109	1.72229	3.73794	8.4436	11.2571	7.916
Prop-2-en-1-ol	OCC=C	-9.92123	-12.6561	7.47971	0.969873	-2.31528	10.7923
Isobutylbenzene	CC(Cc1ccccc1)C	26.3577	26.5335	0.0308949	24.418	25.0079	0.347965
sec-Butylbenzene	CCC(c1ccccc1)C	23.8247	26.5335	7.33787	26.0725	25.0079	1.13338
Styrene	C=Cc1ccccc1	16.8073	15.7552	1.1069	16.8302	14.7369	4.38151
Allylbenzene	C=CCc1ccccc1	17.3208	19.3554	4.13962	18.4276	18.0385	0.151431
Benzylmethylketone	CC(Cc1ccccc1)=O	3.45731	3.14151	0.0997327	8.2154	7.33997	0.766369
Phenylacetonitrile	N#CCc1ccccc1	5.3286	1.74523	12.8405	8.90001	5.12137	14.2781
2,3-Dimethylphenol	Cc1cccc(c1C)O	0.256731	2.13534	3.52918	14.1487	14.703	0.307224
3-Ethylphenol	CCc1cccc(c1)O	0.861476	1.6953	0.695264	13.6923	14.6024	0.828244
4-Propylphenol	CCCc1ccc(cc1)O	4.19328	5.29546	1.21482	17.6859	17.9039	0.0475175
4-Isopropylphenol	CC(c1ccc(cc1)O)C	3.50295	5.29546	3.21309	16.5449	17.9039	1.84692
4-Butylphenol	CCCCc1ccc(cc1)O	7.64488	8.89563	1.56436	20.8238	21.2054	0.145666
3-tert-Butylphenol	CC(c1cccc(c1)O)(C)C	6.61796	8.89563	5.18776	18.8555	21.2054	5.52219
4-tert-Butylphenol	CC(c1ccc(cc1)O)(C)C	6.53809	8.89563	5.55799	18.884	21.2054	5.38894
4-Pentylphenol	CCCCCc1ccc(cc1)O	11.9922	12.4958	0.253603	23.1629	24.5069	1.80649
4-tert-Pentylphenol	CC(Cc1ccc(cc1)O)(C)C	8.61476	12.4958	15.0624	21.8507	24.5069	7.05561
2-Phenylethanol	OCCc1ccccc1	-2.00821	-4.14567	4.56875	7.75899	6.3707	1.92734
3-Phenylpropan-1-ol	OCCCc1ccccc1	1.32359	-0.54551	3.49354	10.7257	9.6722	1.10977
2-Ethylpyridine	CCc1ccccn1	3.78821	1.6231	4.68772	9.64168	8.7337	0.824433
3-Ethylpyridine	CCc1cccnc1	4.12481	1.6231	6.25859	9.47053	8.7337	0.542917
4-Ethylpyridine	CCc1ccncc1	3.73116	1.6231	4.44393	9.41348	8.7337	0.462097
Linalool	C\C(=C/CCC(C=C)(C)O)C	10.3035	8.96706	1.78602	16.9443	17.1273	0.0335086
2-Phenylethylamine	c1cccc(c1)CCN	-3.57142	-1.26969	5.29793	8.04424	8.99938	0.912277
3-Phenylpropylamine	c1cccc(c1)CCCN	4.41406	2.33047	4.34136	10.4404	12.3009	3.46137
4-Phenylbutylamine	c1cccc(c1)CCCCN	5.97898	5.93063	0.00233776	13.6923	15.6024	3.64829
Amphetamine	c1(ccccc1)CC(C)N	2.91533	2.33047	0.342054	10.041	12.3009	5.10686

## Sheet: 3 Expt. v calc. by SSIMPLE
	Solvent	No. of data points	rmsd
	Hexadecane	219	3.15268
	Hexane	87	2.9245
	Cyclohexane	51	3.18452
	Diethyl Ether	25	4.77263
	CCl4	86	3.23325
	Dichloromethane	28	2.51014
	Trichloromethane	71	3.66881
	Di-n-butyl ether	35	4.36131
	Acetonitrile	24	4.15866
	Benzene	37	3.54006
	Propionitrile	21	3.79297
	Butyronitrile	31	3.73422
	Tetrahydrofuran	49	2.90255
	1,2-Dichloroethane	58	4.04289
	Chlorobenzene	57	2.7462
	Propanone	46	3.44327
	Butanone	42	3.38486
	Cyclohexanone	30	2.95768
	Methanol	64	4.33008
	Ethanol	44	3.52575
	Propan-1-ol	48	3.41409
	Butan-1-ol	57	3.27144
	Pentan-1-ol	44	2.72254
	Hexan-1-ol	30	3.3033
	Heptan-1-ol	21	1.55368
	Octan-1-ol	74	3.0896
	Decan-1-ol	27	3.61018
	Propan-2-ol	62	3.93808
	Butan-2-ol	29	4.35233
	2-Methylpropan-1-ol	38	3.32868
	2-Methylpropan-2-ol	44	3.19415
	3-Methylbutan-1-ol	22	2.74766
	Toluene	34	3.11845
	Cyclohexane	51	3.18452
	Perfluorohexane	27	8.43902
		n Total	Overall rmsd
		1713	3.53398
			n	rmsd		n	rmsd		n	rmsd		n	rmsd		n	rmsd		n	rmsd		n	rmsd		n	rmsd		n	rmsd		n	rmsd		n	rmsd		n	rmsd		n	rmsd		n	rmsd		n	rmsd		n	rmsd
			219	3.15268		25	4.77263		86	3.23325		28	2.51014		71	3.66881		35	4.36131		24	4.15866		37	3.54006		21	3.79297		31	3.73422		49	2.90255		58	4.04289		57	2.7462		46	3.44327		42	3.38486		30	2.95768
		Expt.			Expt.			Expt.		0	Expt.		0	Expt.		0	Expt.		0	Expt.		0	Expt.		0	Expt.		0	Expt.		0	Expt.		0	Expt.		0	Expt.		0	Expt.		0	Expt.		0	Expt.		0
Solute name	SMILES	Water-> Hexadecane	Calculated	Diff^2	Water-> Diethyl Ether	Calculated	Diff^2	Water-> CCl4	Calculated	Diff^2	Water-> Dichloromethane	Calculated	Diff^2	Water-> CHCl3	Calculated	Diff^2	Water-> Di-n-butyl ether	Calculated	Diff^2	Water-> Acetonitrile	Calculated	Diff^2	Water-> Benzene	Calculated	Diff^2	Water-> Propionitrile	Calculated	Diff^2	Water-> Butyronitrile	Calculated	Diff^2	Water-> Tetrahydrofuran	Calculated	Diff^2	Water-> 1,2-Dichloroethane	Calculated	Diff^2	Water-> Chlorobenzene	Calculated	Diff^2	Water-> Propanone	Calculated	Diff^2	Water-> Butanone	Calculated	Diff^2	Water-> Cyclohexanone	Calculated	Diff^2
n-pentane	CCCCC	22.0561	20.7895	1.60416	#N/A	23.4168	0	23.1857	22.9553	0.05307	22.5011	23.7082	1.45709	23.1857	23.0719	0.0129428	23.0145	22.7294	0.0812867	18.4504	21.9047	11.9319	22.2158	23.2232	1.01486	#N/A	22.4178	0	20.6754	22.5348	3.45746	23.0145	22.2519	0.581666	21.0748	22.6053	2.34241	23.585	22.9268	0.433273	21.0177	21.1173	0.00990798	21.5312	21.7013	0.0289504	21.0006	21.6222	0.386386
n-hexane	CCCCCC	25.6104	24.6761	0.872925	#N/A	27.3613	0	27.3904	26.7966	0.352564	26.0782	27.5525	2.17358	26.7628	26.8953	0.0175539	26.4775	26.7562	0.0776745	21.5711	25.4124	14.7558	25.5077	27.1041	2.54856	23.0545	26.1031	9.29438	23.7391	26.315	6.63556	26.5916	25.9545	0.405915	24.7089	26.3754	2.77694	27.2192	26.8033	0.172981	23.9102	24.5993	0.47484	24.766	25.3442	0.334359	24.3039	25.3318	1.05654
n-heptane	CCCCCCC	29.2902	28.8773	0.170455	#N/A	31.3098	0	31.0417	30.9569	0.00718228	29.8436	31.5517	2.91767	30.5282	30.9414	0.170727	30.4711	30.7967	0.106018	24.5948	28.9355	18.8409	#N/A	31.1181	0	26.4205	29.7982	11.4086	27.2763	30.0967	7.95509	30.2429	29.7991	0.197011	28.1891	30.182	3.97153	30.9846	30.8752	0.011968	27.2192	28.1952	0.952512	28.4743	29.1084	0.402027	28.0008	29.1746	1.37778
n-octane	CCCCCCCC	33.0099	34.9155	3.63123	34.3963	37.2594	8.1975	35.1379	36.9202	3.17656	33.2552	37.4327	17.4514	34.2822	36.8358	6.5212	33.9969	36.8638	8.21918	27.3219	34.1969	47.2652	34.3963	37.0435	7.00777	29.4328	35.3211	34.6721	30.3456	35.7564	29.2766	33.9969	35.4842	2.21215	31.6578	35.8857	17.8747	34.7956	36.8282	4.13133	30.4597	33.4997	9.24156	31.7149	34.6669	8.7143	31.538	34.8453	10.9383
n-nonane	CCCCCCCCC	36.1249	38.8091	7.20491	#N/A	41.2058	0	38.2244	40.7685	6.47257	36.2847	41.2816	24.9697	37.4828	40.6652	10.1278	#N/A	40.8941	0	29.3815	37.7083	69.3364	#N/A	40.9284	0	31.7776	39.0103	52.3121	32.9757	39.5407	43.099	37.0263	39.1889	4.67685	34.459	39.6583	27.0322	38.0533	40.7098	7.05722	33.1468	36.9861	14.7396	34.5161	38.314	14.4242	34.208	38.5592	18.9332
n-decane	CCCCCCCCCC	39.9702	42.6588	7.22882	#N/A	45.1063	0	#N/A	44.5929	0	#N/A	45.097	0	#N/A	44.4507	0	#N/A	44.9139	0	#N/A	41.2707	0	#N/A	44.773	0	#N/A	42.7565	0	#N/A	43.3861	0	#N/A	42.7887	0	#N/A	43.3939	0	#N/A	44.5536	0	#N/A	40.4615	0	38.4526	41.9307	12.0971	#N/A	42.2306	0
isopentane	CCC(C)C	21.4684	20.518	0.903255	#N/A	23.3699	0	#N/A	22.6962	0	#N/A	23.5579	0	#N/A	22.8668	0	#N/A	22.67	0	#N/A	21.8742	0	#N/A	23.084	0	#N/A	22.3889	0	#N/A	22.508	0	#N/A	22.1141	0	#N/A	22.5375	0	#N/A	22.7443	0	#N/A	21.0053	0	#N/A	21.5759	0	20.7781	21.4826	0.49626
2-methylpentane	CCCC(C)C	24.7774	24.7293	0.00231107	#N/A	27.357	0	26.5289	26.8502	0.103255	25.2738	27.5733	5.28786	25.9584	26.9337	0.951168	#N/A	26.7055	0	20.8808	25.3347	19.8375	#N/A	27.1208	0	22.3641	26.0139	13.321	23.1058	26.2138	9.65938	25.9013	26.0558	0.023876	23.8475	26.3731	6.37862	26.3577	26.8314	0.224325	23.277	24.5965	1.74117	24.1327	25.3536	1.49042	23.6364	25.3494	2.93433
3-methylpentane	CCC(C)CC	25.2224	24.7692	0.205436	#N/A	27.3652	0	#N/A	26.885	0	#N/A	27.5931	0	#N/A	26.9596	0	#N/A	26.7245	0	#N/A	25.3489	0	#N/A	27.1416	0	#N/A	26.0301	0	#N/A	26.2323	0	#N/A	26.0623	0	#N/A	26.3823	0	#N/A	26.858	0	#N/A	24.6136	0	#N/A	25.3723	0	#N/A	25.3701	0
3-methylhexane	CCCC(C)CC	28.7197	28.9312	0.0447663	#N/A	31.3048	0	#N/A	31.009	0	#N/A	31.5702	0	#N/A	30.9769	0	#N/A	30.7462	0	#N/A	28.8551	0	#N/A	31.1343	0	#N/A	29.7066	0	#N/A	29.9938	0	#N/A	29.8986	0	#N/A	30.1777	0	#N/A	30.9027	0	#N/A	28.1896	0	#N/A	29.1159	0	#N/A	29.191	0
2,2-dimethylpentane	CCCC(C)(C)C	27.9894	26.4376	2.40809	#N/A	29.2367	0	#N/A	28.562	0	#N/A	29.3438	0	#N/A	28.6486	0	#N/A	28.6145	0	#N/A	27.0437	0	#N/A	28.913	0	#N/A	27.81	0	#N/A	28.0546	0	#N/A	27.7588	0	#N/A	28.157	0	#N/A	28.5954	0	#N/A	26.2186	0	#N/A	27.0366	0	#N/A	27.0491	0
3-methylheptane	CCCCC(C)CC	32.4622	32.834	0.138238	#N/A	35.2537	0	#N/A	34.8667	0	#N/A	35.4257	0	#N/A	34.8145	0	#N/A	34.7816	0	#N/A	32.373	0	#N/A	35.0249	0	#N/A	33.4027	0	#N/A	33.7853	0	#N/A	33.6044	0	#N/A	33.9544	0	#N/A	34.7914	0	#N/A	31.6819	0	#N/A	32.7685	0	#N/A	32.9104	0
2,5-dimethylhexane	CC(C)CCC(C)C	30.397	32.5289	4.54496	#N/A	35.1995	0	32.4052	34.5776	4.7194	30.9218	35.2587	18.8084	31.8347	34.5869	7.57488	#N/A	34.7074	0	25.1597	32.3326	51.4506	#N/A	34.8686	0	27.2706	33.3623	37.1099	28.1834	33.7453	30.9346	31.6635	33.4571	3.21697	29.2103	33.8794	21.8004	32.2911	34.5867	5.26986	28.3545	31.5542	10.2382	29.4385	32.6258	10.1591	28.9992	32.7516	14.0804
2,2,4-trimethylpentane	CC(C)CC(C)(C)C	29.815	30.1297	0.0990257	#N/A	33.0965	0	#N/A	32.2293	0	#N/A	33.0545	0	#N/A	32.3	0	#N/A	32.5535	0	#N/A	30.515	0	#N/A	32.6651	0	#N/A	31.459	0	#N/A	31.7978	0	31.5494	31.3255	0.0501534	#N/A	31.8325	0	#N/A	32.3235	0	#N/A	29.5987	0	29.0391	30.5608	2.31545	#N/A	30.626	0
2,3,4-trimethylpentane	CC(C)C(C)C(C)C	30.5852	30.6434	0.00337671	#N/A	33.2234	0	31.9488	32.7129	0.583869	30.5225	33.3576	8.03764	31.4353	32.7139	1.63492	#N/A	32.6459	0	25.0456	30.5011	29.7634	#N/A	32.9465	0	26.8712	31.4312	20.794	27.8981	31.7555	14.8793	31.2071	31.7058	0.248689	28.925	31.9914	9.40243	31.7776	32.6788	0.812071	28.0122	29.8104	3.23361	29.0962	30.8145	2.95268	28.7083	30.9159	4.87352
2-methyloctane	CCCCCCC(C)C	34.8926	36.5081	2.60976	#N/A	39.1303	0	#N/A	38.5238	0	#N/A	39.1503	0	#N/A	38.471	0	#N/A	38.7917	0	#N/A	35.9572	0	#N/A	38.7853	0	#N/A	37.1766	0	#N/A	37.6646	0	#N/A	37.0804	0	#N/A	37.6557	0	#N/A	38.5217	0	#N/A	35.0977	0	#N/A	36.3117	0	#N/A	36.4959	0
2,2,5-trimethylhexane	CC(C)CCC(C)(C)C	32.6163	34.0504	2.05671	#N/A	37.0521	0	#N/A	36.1097	0	#N/A	36.9291	0	#N/A	36.1611	0	#N/A	36.6003	0	#N/A	34.0537	0	#N/A	36.5693	0	#N/A	35.1762	0	#N/A	35.61	0	#N/A	35.0349	0	#N/A	35.6229	0	#N/A	36.2283	0	#N/A	33.1084	0	#N/A	34.228	0	#N/A	34.3585	0
3,3-diethylpentane	CCC(CC)(CC)CC	32.1947	32.9064	0.506429	#N/A	35.252	0	#N/A	34.934	0	#N/A	35.4525	0	#N/A	34.8608	0	#N/A	34.7398	0	#N/A	32.2985	0	#N/A	35.0506	0	#N/A	33.318	0	#N/A	33.6904	0	#N/A	33.7053	0	#N/A	33.9537	0	#N/A	34.8309	0	#N/A	31.6827	0	#N/A	32.7834	0	#N/A	32.9352	0
2-methylnonane	CCCCCCCC(C)C	38.3556	40.7574	5.76865	#N/A	43.1267	0	#N/A	42.7144	0	#N/A	43.1885	0	#N/A	42.5678	0	#N/A	42.8453	0	#N/A	39.4351	0	#N/A	42.8432	0	#N/A	40.8204	0	#N/A	41.3905	0	#N/A	41.0324	0	#N/A	41.5032	0	#N/A	42.6355	0	#N/A	38.7103	0	#N/A	40.111	0	#N/A	40.3855	0
cyclopentane	C1CCCC1	19.1521	16.8051	5.50848	#N/A	19.4641	0	#N/A	19.0143	0	#N/A	19.8115	0	#N/A	19.1696	0	#N/A	18.7304	0	#N/A	18.447	0	#N/A	19.2991	0	#N/A	18.7926	0	#N/A	18.826	0	#N/A	18.4358	0	#N/A	18.819	0	#N/A	18.9889	0	#N/A	17.6082	0	#N/A	18.0207	0	#N/A	17.8664	0
cyclohexane	C1CCCCC1	22.0447	20.7413	1.69872	22.6494	23.4733	0.67878	23.5052	22.8838	0.386095	22.3071	23.7041	1.95152	23.7334	23.0458	0.472724	22.3071	22.8436	0.287851	#N/A	22.0048	0	22.0789	23.2352	1.33705	19.4545	22.5352	9.49039	20.3673	22.6723	5.31306	22.9974	22.1653	0.692366	21.052	22.6458	2.54044	23.5622	22.9161	0.417479	19.968	21.1388	1.3709	20.8238	21.7203	0.803872	21.1775	21.6386	0.212627
cyclooctane	C1CCCCCCC1	28.2918	27.0725	1.48667	#N/A	29.4757	0	#N/A	29.1288	0	#N/A	29.7473	0	#N/A	29.1637	0	#N/A	28.9731	0	#N/A	27.2951	0	#N/A	29.309	0	#N/A	28.085	0	#N/A	28.3555	0	#N/A	28.0128	0	#N/A	28.4206	0	#N/A	29.065	0	#N/A	26.5705	0	#N/A	27.4209	0	#N/A	27.4673	0
methylcyclopentane	CC1CCCC1	23.2598	20.6397	6.86539	#N/A	23.3987	0	#N/A	22.8116	0	#N/A	23.6316	0	#N/A	22.9613	0	#N/A	22.7326	0	#N/A	21.9378	0	#N/A	23.1532	0	#N/A	22.4581	0	#N/A	22.5828	0	#N/A	22.1324	0	#N/A	22.5783	0	#N/A	22.8312	0	#N/A	21.0703	0	#N/A	21.641	0	#N/A	21.5505	0
methylcyclohexane	CC1CCCCC1	26.0668	24.6472	2.01512	#N/A	27.3722	0	#N/A	26.7687	0	#N/A	27.5484	0	#N/A	26.8792	0	#N/A	26.8171	0	#N/A	25.5015	0	#N/A	27.101	0	23.3911	26.2041	7.91341	24.1898	26.428	5.00967	26.643	25.865	0.605301	#N/A	26.3864	0	#N/A	26.7929	0	23.5622	24.619	1.11681	24.3609	25.3515	0.981181	#N/A	25.3312	0
ethylcyclohexane	CCC1CCCCC1	31.1329	28.7477	5.68922	#N/A	31.3481	0	32.2911	30.8104	2.19243	30.8077	31.5022	0.482209	31.7776	30.8561	0.849117	#N/A	30.8716	0	25.3879	29.0005	13.051	#N/A	31.0859	0	27.0994	29.8767	7.71331	28.1263	30.1915	4.26499	31.3783	29.6971	2.82625	29.3815	30.1994	0.669029	32.177	30.8083	1.87338	27.9552	28.1763	0.0488822	29.1533	29.0853	0.00461796	29.2559	29.1459	0.0121029
cis-1,2-dimethylcyclohexane	C[C@@H]1([C@@H](CCCC1)(C))	28.6227	26.5826	4.1621	#N/A	29.3441	0	#N/A	28.6854	0	#N/A	29.4694	0	#N/A	28.7899	0	#N/A	28.8252	0	#N/A	27.253	0	#N/A	29.0376	0	#N/A	28.0433	0	#N/A	28.3129	0	#N/A	27.7223	0	#N/A	28.2713	0	#N/A	28.7265	0	#N/A	26.361	0	#N/A	27.1729	0	#N/A	27.1852	0
trans-1,4-dimethylcyclohexane	CC1CCC(C)CC1	28.7482	28.4191	0.108303	#N/A	31.2909	0	#N/A	30.5044	0	#N/A	31.3289	0	#N/A	30.6193	0	#N/A	30.7891	0	#N/A	28.9612	0	#N/A	30.9198	0	#N/A	29.8362	0	#N/A	30.1496	0	#N/A	29.5443	0	#N/A	30.1243	0	#N/A	30.5903	0	#N/A	28.0441	0	#N/A	28.9349	0	#N/A	28.9769	0
tetrachloromethane	[Cl]C([Cl])([Cl])[Cl]	16.4479	13.5832	8.20676	18.7129	20.6372	3.70324	18.827	15.9684	8.17117	#N/A	17.7561	0	18.884	16.5289	5.54652	17.743	18.3453	0.362842	15.6321	16.6685	1.0742	#N/A	17.4815	0	16.659	17.0095	0.122841	#N/A	16.8371	0	19.7968	21.7775	3.92313	17.6859	17.6819	1.64871e-05	#N/A	16.6499	0	17.6859	17.822	0.0185217	17.6859	18.5828	0.804348	18.4105	18.5963	0.0345284
benzene	c1ccccc1	12.3003	12.1699	0.0169935	#N/A	16.3216	0	14.8904	15.7832	0.79713	16.4878	17.1224	0.40264	15.7462	16.2362	0.240158	13.5782	14.7527	1.37946	13.8635	16.2449	5.67104	15.4609	15.6177	0.0245914	14.8334	16.1504	1.73453	14.8334	15.7435	0.828375	16.2596	16.4095	0.0224598	15.3468	16.2495	0.814817	14.8904	15.3009	0.168493	14.7193	15.522	0.64444	15.1757	15.4651	0.0837964	15.2156	15.0108	0.0419615
water	O([H])[H]	-25.3593	-25.8594	0.250051	#N/A	-7.75213	0	-23.1058	-20.1849	8.53172	-15.6891	-15.689	6.12477e-09	-17.9712	-16.6294	1.80041	#N/A	-10.6679	0	#N/A	-7.111	0	-19.6257	-19.1728	0.205052	#N/A	-8.39406	0	#N/A	-9.37301	0	-10.1471	-1.84137	68.9851	#N/A	-14.6895	0	#N/A	-20.1047	0	-8.39709	-4.06569	18.761	#N/A	-4.54938	0	#N/A	-4.96939	0
methanol	CO	-15.8032	-17.6104	3.26582	-7.18847	-5.87171	1.73386	-12.7795	-11.2456	2.35279	-8.27245	-6.75571	2.30049	-7.58783	-6.78944	0.637437	-10.2692	-8.17096	4.40279	-4.62116	-2.16954	6.01042	-10.5545	-11.821	1.60408	#N/A	-4.0196	0	-6.04745	-5.04663	1.00163	-5.13462	-2.50749	6.90181	-9.01412	-7.07335	3.76658	-11.8096	-11.9901	0.0325735	-4.05065	-2.63529	2.00324	-5.30578	-3.4686	3.37522	#N/A	-4.25665	0
ethanol	CCO	-12.4657	-13.5528	1.18172	#N/A	-2.11051	0	-9.18527	-7.04693	4.57251	-5.41988	-2.63736	7.74241	-4.96347	-2.68154	5.2072	-7.30258	-4.26273	9.24066	-2.79552	1.59891	19.311	-6.61796	-7.80765	1.41537	#N/A	-0.0968185	0	-3.76539	-1.06589	7.28729	-1.8827	0.865132	7.55055	-5.93334	-3.13345	7.83937	-7.87309	-7.92362	0.00255362	-2.45321	0.905905	11.2836	-2.85257	0.115478	8.8093	-2.89821	-0.677778	4.93032
propan-1-ol	CCCO	-8.72316	-10.0424	1.7404	#N/A	2.01782	0	-5.53398	-3.62141	3.65794	#N/A	0.867779	0	-1.71154	0.657878	5.61415	#N/A	-0.246844	0	#N/A	4.85727	0	-4.1077	-4.11746	9.52306e-05	#N/A	3.36714	0	-0.798719	2.47112	10.6918	1.36923	4.98295	13.059	-2.33911	0.464043	7.85764	-4.27885	-4.33731	0.00341708	#N/A	4.40359	0	0.456411	3.81673	11.2917	#N/A	3.11269	0
butan-1-ol	CCCCO	-4.90071	-5.90784	1.01431	#N/A	5.64581	0	-1.14103	0.542994	2.83593	#N/A	4.9956	0	2.39616	4.88092	6.17407	-0.171154	3.60085	14.228	#N/A	8.48026	0	-1.14103	-0.121437	1.03956	#N/A	7.11691	0	2.68141	6.31796	13.2245	#N/A	8.13984	0	0.855771	4.37108	12.3574	-0.39936	-0.254567	0.0209648	#N/A	7.70376	0	3.93654	7.21933	10.7767	#N/A	6.54444	0
pentan-1-ol	CCCCCO	-1.39205	-1.73954	0.120746	#N/A	9.5813	0	2.28205	4.67363	5.71962	#N/A	8.98424	0	5.99039	8.92116	8.58938	#N/A	7.71731	0	#N/A	12.1327	0	2.225	3.86783	2.69888	#N/A	10.9541	0	#N/A	10.2614	0	#N/A	11.8396	0	4.1077	8.16796	16.4857	2.85257	3.79464	0.887493	#N/A	11.3278	0	#N/A	10.9957	0	#N/A	10.3914	0
hexan-1-ol	CCCCCCO	2.16795	2.54374	0.141216	#N/A	13.59	0	5.59103	8.89701	10.9295	#N/A	13.0171	0	9.64168	13.0162	11.3875	#N/A	11.729	0	#N/A	15.5273	0	7.24552	7.93029	0.468906	#N/A	14.5075	0	8.55771	13.8836	28.3652	#N/A	15.926	0	6.96027	11.9964	25.3622	6.78911	7.91852	1.27557	#N/A	14.9535	0	10.6686	14.8217	17.2484	#N/A	14.3173	0
heptan-1-ol	CCCCCCCO	5.84777	6.12467	0.0766744	#N/A	17.3246	0	8.95707	12.4825	12.4287	#N/A	16.6771	0	13.7494	16.6658	8.50536	#N/A	15.5256	0	#N/A	18.8857	0	11.0109	11.5628	0.30453	#N/A	18.0151	0	12.7795	17.4763	22.0596	#N/A	19.433	0	10.7827	15.5946	23.1546	10.6116	11.5463	0.873731	#N/A	18.2461	0	#N/A	18.263	0	#N/A	17.8154	0
octan-1-ol	CCCCCCCCO	9.23662	12.2565	9.11977	#N/A	23.1729	0	11.9237	18.5731	44.2141	#N/A	22.6363	0	#N/A	22.643	0	#N/A	21.5488	0	#N/A	24.2213	0	16.6019	17.5353	0.871228	#N/A	23.609	0	15.3468	23.2073	61.7878	#N/A	24.9115	0	#N/A	21.3309	0	#N/A	17.5734	0	#N/A	23.5116	0	17.1725	23.748	43.2383	#N/A	23.3913	0
nonan-1-ol	CCCCCCCCCO	12.9507	16.7253	14.2481	#N/A	27.7541	0	#N/A	22.8353	0	#N/A	26.7965	0	#N/A	26.7121	0	#N/A	26.2222	0	#N/A	28.0736	0	#N/A	21.9527	0	#N/A	27.7272	0	#N/A	27.4525	0	#N/A	29.2467	0	#N/A	25.4705	0	#N/A	21.9384	0	#N/A	27.4893	0	#N/A	27.9408	0	#N/A	27.6874	0
decan-1-ol	CCCCCCCCCCO	16.7731	20.0179	10.5286	#N/A	30.6118	0	#N/A	26.1293	0	#N/A	30.292	0	#N/A	30.4324	0	#N/A	28.9015	0	#N/A	30.327	0	#N/A	25.1651	0	#N/A	29.9395	0	#N/A	29.6993	0	#N/A	32.1778	0	#N/A	28.7585	0	#N/A	25.2539	0	#N/A	29.6999	0	#N/A	30.3827	0	#N/A	30.2184	0
dimethylether	COC	-0.656091	-7.07254	41.1708	#N/A	-2.90615	0	#N/A	-0.734355	0	#N/A	3.00418	0	#N/A	3.50578	0	#N/A	-4.52458	0	#N/A	3.04557	0	#N/A	-2.6181	0	#N/A	0.939082	0	#N/A	-0.0665244	0	#N/A	-2.51959	0	#N/A	1.4805	0	1.14103	-2.15485	10.8628	#N/A	-0.649898	0	#N/A	-1.77321	0	#N/A	-2.87931	0
diethyl ether	CCOCC	4.19328	2.13984	4.21658	7.75899	6.06371	2.87397	7.41668	8.24885	0.692504	9.07117	11.6361	6.57891	10.0981	11.9957	3.60088	6.56091	4.8023	3.0927	#N/A	11.1572	0	#N/A	6.37294	0	#N/A	9.57122	0	#N/A	8.80131	0	7.35963	5.73871	2.62736	7.07437	9.91679	8.07937	9.58463	6.81738	7.65767	6.27565	7.45623	1.39376	#N/A	6.6346	0	#N/A	5.66412	0
dipropylether	CCCOCCC	11.7184	11.9554	0.0561866	#N/A	15.5581	0	15.0616	18.0628	9.0076	15.8603	21.2988	29.5772	#N/A	21.7783	0	#N/A	14.4548	0	#N/A	19.6533	0	#N/A	15.9338	0	#N/A	18.4322	0	#N/A	17.8548	0	#N/A	14.9558	0	#N/A	19.179	0	#N/A	16.4939	0	#N/A	16.0417	0	13.1218	15.6197	6.23926	#N/A	14.8243	0
dibutylether	CCCCOCCCC	18.9068	18.7477	0.0253049	#N/A	22.5051	0	22.7635	25.1404	5.64956	#N/A	28.5231	0	#N/A	29.0363	0	19.4545	21.5863	4.54457	#N/A	26.4097	0	#N/A	22.8431	0	#N/A	25.4235	0	#N/A	24.9679	0	22.1473	21.3913	0.571592	21.5084	26.17	21.7307	#N/A	23.4647	0	#N/A	22.464	0	#N/A	22.2068	0	#N/A	21.4471	0
chlorobenzene	[Cl]c1ccccc1	16.1855	16.3746	0.0357713	#N/A	21.66	0	18.9411	19.5727	0.398978	20.025	20.9364	0.830526	19.3975	20.0004	0.363514	#N/A	19.7473	0	#N/A	19.5353	0	#N/A	19.8785	0	#N/A	19.7734	0	#N/A	19.4826	0	20.5955	22.3741	3.16312	#N/A	20.1983	0	19.1693	19.401	0.0537186	18.9411	19.9148	0.948235	#N/A	20.3001	0	#N/A	20.0897	0
1,2-dichlorobenzene	[Cl]c1ccccc1[Cl]	20.0707	16.4609	13.0301	#N/A	22.9138	0	22.7064	19.9902	7.37816	#N/A	21.5163	0	#N/A	20.4739	0	#N/A	20.8265	0	#N/A	20.546	0	#N/A	20.2711	0	#N/A	20.8349	0	#N/A	20.5028	0	24.0186	24.0571	0.00147707	#N/A	20.8388	0	#N/A	19.7512	0	#N/A	21.3364	0	#N/A	21.7273	0	#N/A	21.5174	0
1,2-dichloroethane	[Cl]CC[Cl]	7.20559	10.6205	11.6618	11.125	18.1448	49.277	10.4975	13.7487	10.5708	#N/A	15.4864	0	12.1519	14.3661	4.90231	9.92694	15.7926	34.4055	#N/A	15.1918	0	#N/A	14.6359	0	#N/A	15.3869	0	#N/A	15.0172	0	13.4641	19.8819	41.1876	12.3231	15.2479	8.55435	#N/A	13.9215	0	#N/A	16.6519	0	12.5513	17.0655	20.3784	#N/A	16.9171	0
methane	C	6.49815	2.87504	13.1269	8.45501	5.63847	7.93291	7.54219	5.24619	5.27163	#N/A	6.17941	0	#N/A	5.55489	0	#N/A	4.52842	0	#N/A	6.02276	0	#N/A	5.55512	0	#N/A	5.73633	0	#N/A	5.42688	0	7.31399	5.46711	3.41094	#N/A	5.55398	0	6.45822	5.20257	1.57665	7.08578	5.28163	3.25495	#N/A	5.1386	0	#N/A	4.74819	0
ethane	CC	10.429	8.84679	2.50337	12.4714	11.6198	0.725274	11.7868	11.12	0.444589	#N/A	12.0392	0	#N/A	11.4051	0	#N/A	10.6361	0	#N/A	11.2971	0	#N/A	11.4775	0	#N/A	11.2768	0	#N/A	11.1134	0	11.1592	11.1065	0.00278198	#N/A	11.2843	0	10.9881	11.1278	0.0195115	10.4746	10.5547	0.00640702	#N/A	10.671	0	9.82995	10.3934	0.317525
propane	CCC	14.183	12.6846	2.24523	#N/A	15.5188	0	15.8375	14.9356	0.813349	#N/A	15.8516	0	#N/A	15.1861	0	#N/A	14.6523	0	#N/A	14.8608	0	#N/A	15.3174	0	#N/A	15.0238	0	#N/A	14.9588	0	#N/A	14.7021	0	#N/A	15.0204	0	14.9246	14.965	0.00163273	13.8977	14.0275	0.0168348	#N/A	14.2834	0	#N/A	14.0592	0
butane	CCCC	17.8856	16.7066	1.39008	#N/A	19.4407	0	19.8539	18.9209	0.870476	#N/A	19.7519	0	#N/A	19.0932	0	18.884	18.68	0.0416319	#N/A	18.3962	0	#N/A	19.2431	0	#N/A	18.7372	0	#N/A	18.7661	0	#N/A	18.4202	0	#N/A	18.7862	0	18.3705	18.9186	0.300411	17.5718	17.5555	0.000266705	18.3135	17.9678	0.119492	#N/A	17.8112	0
trimethylamine	CN(C)C	-4.16475	-0.80015	11.3205	-3.53719	3.09366	43.9681	-1.31218	5.07358	40.778	#N/A	9.01666	0	2.90962	9.98897	50.1172	#N/A	1.74125	0	#N/A	8.04297	0	-1.71154	3.46173	26.7627	#N/A	6.30099	0	#N/A	5.59367	0	#N/A	3.0056	0	#N/A	7.32276	0	-1.71154	4.0186	32.8345	-2.68141	4.37497	49.7926	#N/A	3.69054	0	#N/A	2.78476	0
triethylamine	CCN(CC)CC	3.87949	13.003	83.2378	5.13462	16.314	124.979	6.73206	18.4575	137.485	#N/A	21.6927	0	10.6116	22.5046	141.444	#N/A	15.3805	0	#N/A	19.6872	0	#N/A	16.7126	0	#N/A	18.6798	0	#N/A	18.2966	0	5.76219	15.5375	95.5572	4.84937	19.6069	217.786	5.64809	17.2766	135.223	3.48013	16.3024	164.41	3.93654	16.1296	148.67	3.73116	15.4769	137.962
piperidine	C1CCNCC1	-3.73686	1.42331	26.6274	#N/A	6.4838	0	#N/A	7.44104	0	#N/A	11.5582	0	5.36283	12.5511	51.6716	#N/A	4.98716	0	#N/A	10.6238	0	-0.228205	5.85997	37.0659	#N/A	9.03529	0	#N/A	8.38147	0	0.570514	6.87153	39.7028	#N/A	9.84493	0	#N/A	6.40741	0	#N/A	7.55383	0	#N/A	7.08227	0	#N/A	6.28684	0
diethylamine	CCNCC	-3.39456	3.41132	46.3199	#N/A	8.44246	0	0.171154	9.46251	86.3294	#N/A	13.5958	0	4.50706	14.5773	101.409	#N/A	6.88662	0	#N/A	12.346	0	-0.228205	7.8822	65.7788	#N/A	10.8146	0	#N/A	10.1716	0	#N/A	8.78915	0	-0.342308	11.845	148.53	#N/A	8.42235	0	-1.36923	9.26444	113.075	#N/A	8.85191	0	#N/A	8.07151	0
dipropylamine	CCCNCCC	3.82815	11.4424	57.9766	#N/A	16.2312	0	#N/A	17.4361	0	#N/A	21.4274	0	#N/A	22.4609	0	#N/A	14.8685	0	#N/A	19.3588	0	5.99039	15.7165	94.5964	#N/A	18.1629	0	#N/A	17.7011	0	#N/A	16.2076	0	#N/A	19.3892	0	#N/A	16.3271	0	#N/A	16.2721	0	#N/A	16.1786	0	#N/A	15.5363	0
dibutylamine	CCCCNCCCC	11.2334	19.165	62.91	#N/A	23.8302	0	#N/A	25.1502	0	#N/A	29.1284	0	#N/A	30.2344	0	#N/A	22.5918	0	#N/A	26.1714	0	#N/A	23.3414	0	#N/A	25.2698	0	#N/A	24.9729	0	#N/A	23.474	0	#N/A	26.8349	0	#N/A	24.0152	0	#N/A	23.05	0	#N/A	23.2758	0	#N/A	22.7643	0
methylamine	CN	-11.6385	-13.165	2.33034	#N/A	-6.13572	0	-9.29937	-6.69895	6.76223	#N/A	-1.92288	0	-5.81924	-0.993897	23.2839	#N/A	-8.43607	0	#N/A	-1.36172	0	-7.93014	-7.95085	0.000429039	#N/A	-3.57051	0	#N/A	-4.61531	0	#N/A	-4.19451	0	#N/A	-3.03009	0	-10.041	-7.56752	6.11829	#N/A	-3.70931	0	#N/A	-4.625	0	#N/A	-5.61	0
ethylamine	CCN	-9.25944	-8.29714	0.926018	#N/A	-1.44234	0	-7.24552	-2.12236	26.2468	#N/A	2.39404	0	-1.9968	3.2039	27.0472	#N/A	-3.65604	0	#N/A	2.49773	0	-7.41668	-3.27457	17.157	#N/A	0.561123	0	#N/A	-0.36297	0	#N/A	0.285595	0	-5.47693	1.22388	44.9008	-3.13783	-2.93973	0.0392416	#N/A	0.342233	0	#N/A	-0.345094	0	#N/A	-1.21085	0
n-propylamine	CCCN	-6.15584	-4.56001	2.54668	#N/A	2.35019	0	-3.36603	1.62941	24.9544	#N/A	6.17145	0	1.42628	6.94965	30.5075	-6.16155	0.24615	41.0586	#N/A	6.02322	0	-2.96667	0.493826	11.975	#N/A	4.25352	0	#N/A	3.41976	0	#N/A	3.75414	0	-1.48334	4.92659	41.0872	-3.36603	0.829157	17.5996	#N/A	3.72255	0	#N/A	3.15849	0	#N/A	2.33345	0
n-butylamine	CCCCN	-2.80693	1.65217	19.8835	#N/A	8.26835	0	0.228205	7.78335	57.0802	#N/A	12.1616	0	4.27885	13.023	76.4606	-2.45321	6.29259	76.489	#N/A	11.2813	0	0.342308	6.47824	37.6496	#N/A	9.76037	0	#N/A	9.05768	0	#N/A	9.5009	0	1.02692	10.6521	92.6438	-0.285257	6.89085	51.4965	#N/A	9.08419	0	#N/A	8.77982	0	#N/A	8.07538	0
pentylamine	CCCCCN	0.793014	5.97337	26.8361	#N/A	12.2631	0	#N/A	12.0275	0	#N/A	16.2186	0	#N/A	17.1241	0	#N/A	10.3956	0	#N/A	14.8302	0	#N/A	10.5808	0	#N/A	13.4881	0	#N/A	12.8803	0	#N/A	13.3633	0	#N/A	14.5113	0	#N/A	11.0528	0	#N/A	12.6951	0	#N/A	12.5691	0	#N/A	11.9497	0
hexylamine	CCCCCCN	4.30738	9.6731	28.791	#N/A	16.1074	0	#N/A	15.7135	0	#N/A	19.9614	0	#N/A	20.8505	0	#N/A	14.2964	0	#N/A	18.249	0	#N/A	14.3233	0	#N/A	17.0695	0	#N/A	16.5496	0	#N/A	16.9866	0	#N/A	18.1952	0	#N/A	14.787	0	#N/A	16.0779	0	#N/A	16.1081	0	#N/A	15.5498	0
heptylamine	CCCCCCCN	7.83315	13.5251	32.3978	#N/A	20.0291	0	#N/A	19.5692	0	#N/A	23.8087	0	#N/A	24.6567	0	#N/A	18.2889	0	#N/A	21.7947	0	#N/A	18.1898	0	#N/A	20.7887	0	#N/A	20.3482	0	#N/A	20.675	0	#N/A	21.9672	0	#N/A	18.6473	0	#N/A	19.5919	0	#N/A	19.7557	0	#N/A	19.2486	0
n-octylamine	CCCCCCCCN	10.9539	17.531	43.2586	#N/A	23.8864	0	#N/A	23.5356	0	#N/A	27.717	0	#N/A	28.6072	0	#N/A	22.2646	0	#N/A	25.2945	0	#N/A	22.0905	0	#N/A	24.455	0	#N/A	24.1147	0	#N/A	24.3064	0	#N/A	25.7265	0	#N/A	22.5894	0	#N/A	23.0427	0	#N/A	23.3699	0	#N/A	22.9321	0
cyclohexylamine	NC1CCCCC1	2.43039	3.88782	2.12411	#N/A	10.5775	0	#N/A	9.96482	0	#N/A	14.3414	0	#N/A	15.0776	0	#N/A	8.69831	0	#N/A	13.4513	0	#N/A	8.79551	0	#N/A	12.0696	0	#N/A	11.4234	0	#N/A	11.4349	0	#N/A	12.8761	0	#N/A	9.14224	0	#N/A	11.0931	0	#N/A	10.8246	0	#N/A	10.1242	0
ethyl benzene	CCc1ccccc1	18.245	19.4005	1.33504	#N/A	23.6105	0	20.4244	23.1932	7.66604	#N/A	24.5895	0	21.109	23.6472	6.4424	#N/A	22.3051	0	#N/A	23.3355	0	#N/A	22.9386	0	#N/A	23.5391	0	20.3673	23.2852	8.51376	21.9648	22.9859	1.04275	#N/A	23.5251	0	21.109	22.6478	2.36781	#N/A	22.1837	0	20.3103	22.2922	3.92779	#N/A	21.8727	0
toluene	Cc1ccccc1	15.2612	15.0203	0.0580399	17.5148	19.3006	3.18904	18.0853	18.986	0.811334	19.2263	20.4312	1.45177	19.4545	19.4876	0.00109191	16.7161	17.8123	1.20181	16.1455	19.4987	11.2435	18.5417	18.6444	0.0105414	17.6289	19.4704	3.39136	17.4007	19.0749	2.80305	19.0552	19.0762	0.000442486	18.4846	19.449	0.930046	18.0853	18.363	0.0771225	17.1154	18.4314	1.73183	17.6289	18.348	0.51716	17.937	17.8431	0.00879994
o-xylene	Cc1ccccc1C	18.7071	19.2191	0.262137	#N/A	23.0402	0	22.0789	23.0504	0.943764	#N/A	24.3265	0	22.3071	23.478	1.37092	#N/A	21.6615	0	#N/A	22.721	0	#N/A	22.5577	0	#N/A	22.8304	0	#N/A	22.5379	0	#N/A	22.7289	0	21.8507	23.1166	1.60247	#N/A	22.3618	0	#N/A	21.7355	0	#N/A	21.8766	0	#N/A	21.4868	0
m-xylene	Cc1cccc(C)c1	18.4219	18.1994	0.0494803	#N/A	22.5278	0	20.3673	22.3261	3.83685	#N/A	23.8406	0	20.9949	22.8579	3.4706	#N/A	21.1285	0	#N/A	22.6923	0	#N/A	21.9032	0	#N/A	22.7598	0	#N/A	22.4156	0	#N/A	22.0152	0	21.5084	22.7602	1.56701	#N/A	21.6484	0	#N/A	21.3967	0	#N/A	21.3808	0	#N/A	20.8843	0
p-xylene	Cc1ccc(C)cc1	18.536	18.8262	0.0842032	#N/A	23.0587	0	20.5955	22.7283	4.54862	#N/A	24.1959	0	#N/A	23.2439	0	#N/A	21.7053	0	#N/A	22.9253	0	#N/A	22.4273	0	#N/A	23.056	0	#N/A	22.768	0	#N/A	22.4839	0	21.5654	23.13	2.44781	#N/A	22.152	0	#N/A	21.7045	0	#N/A	21.7799	0	#N/A	21.3386	0
mesitylene	Cc1cc(C)cc(C)c1	21.0177	22.3451	1.76204	#N/A	26.35	0	#N/A	26.4645	0	#N/A	27.8518	0	#N/A	26.9241	0	#N/A	25.1195	0	#N/A	26.2882	0	#N/A	25.8767	0	#N/A	26.5155	0	#N/A	26.2645	0	#N/A	25.5834	0	#N/A	26.5682	0	#N/A	25.6907	0	#N/A	24.9181	0	#N/A	25.0401	0	#N/A	24.6037	0
1,2,4,5-tetramethylbenzene	Cc1cc(C)c(C)cc1C	25.6674	27.0654	1.95424	27.6813	30.7025	9.12736	#N/A	30.8647	0	#N/A	32.0718	0	#N/A	31.2342	0	27.0538	29.5495	6.22881	#N/A	29.7378	0	#N/A	30.2899	0	#N/A	30.1704	0	#N/A	30.0588	0	#N/A	29.876	0	#N/A	30.6183	0	#N/A	30.1425	0	#N/A	28.606	0	#N/A	29.0362	0	#N/A	28.7637	0
propanone	CC(C)=O	-6.46963	-9.96544	12.2207	-1.48334	-3.55504	4.29197	-2.56731	-3.04562	0.228777	3.19488	1.70224	2.22797	2.62436	2.28547	0.11485	-3.30898	-6.00554	7.27145	1.76859	1.61904	0.0223672	-0.285257	-4.63526	18.9225	#N/A	-0.777063	0	#N/A	-1.95171	0	0.114103	-1.96391	4.31815	1.71154	0.436151	1.62662	-0.969873	-4.25626	10.8003	1.19808	-1.47894	7.16643	0.513462	-2.4931	9.03941	-0.233911	-3.57695	11.1759
butanone	CCC(C)=O	-2.47032	-6.47175	16.0114	1.76859	-0.175808	3.78069	1.54039	0.53233	1.01618	6.50386	5.43599	1.14034	6.56091	6.0665	0.244441	0.0570514	-2.5302	6.69387	4.3359	4.93309	0.356627	3.13783	-1.06799	17.6889	#N/A	2.62022	0	3.76539	1.51958	5.04368	3.48013	1.0116	6.09365	5.24873	4.0672	1.396	3.25193	-0.658493	15.2914	3.9936	1.47036	6.3667	3.65129	0.556558	9.57735	3.27475	-0.510497	14.3281
pentan-2-one	CCCC(C)=O	0.998399	-2.93593	15.479	#N/A	3.47033	0	5.36283	4.09042	1.61902	#N/A	9.11518	0	#N/A	9.73548	0	#N/A	1.16823	0	#N/A	8.26557	0	6.78911	2.55676	17.9128	#N/A	6.08242	0	#N/A	5.06195	0	#N/A	4.36773	0	#N/A	7.69563	0	7.35963	2.95909	19.3647	#N/A	4.63811	0	#N/A	3.86009	0	#N/A	2.83619	0
pentan-3-one	CCC(=O)CC	1.7743	-0.76055	6.42545	#N/A	4.98077	0	#N/A	5.91769	0	#N/A	10.3553	0	#N/A	10.8781	0	#N/A	3.00249	0	#N/A	9.61442	0	#N/A	4.27554	0	#N/A	7.67488	0	#N/A	6.7563	0	#N/A	5.60226	0	#N/A	8.82535	0	#N/A	4.68835	0	#N/A	6.15738	0	#N/A	5.42915	0	#N/A	4.46371	0
hexan-2-one	CCCCC(C)=O	4.9977	1.2655	13.9293	#N/A	7.40159	0	8.67181	8.24993	0.177982	#N/A	13.1845	0	#N/A	13.849	0	#N/A	5.23648	0	#N/A	11.8803	0	10.3263	6.62285	13.7156	#N/A	9.86278	0	#N/A	8.93897	0	#N/A	8.03705	0	#N/A	11.5972	0	10.6686	7.07247	12.9322	#N/A	8.17879	0	#N/A	7.5543	0	#N/A	6.5958	0
hexan-3-one	CCCC(=O)CC	4.91212	2.89036	4.08753	#N/A	8.7392	0	#N/A	9.55004	0	#N/A	14.0386	0	#N/A	14.5152	0	#N/A	6.84999	0	#N/A	13.0316	0	#N/A	7.97676	0	#N/A	11.2558	0	#N/A	10.4319	0	#N/A	9.04555	0	#N/A	12.4612	0	#N/A	8.37643	0	#N/A	9.43746	0	#N/A	8.85098	0	#N/A	7.93558	0
heptan-4-one	CCCC(=O)CCC	8.30097	9.23191	0.866639	#N/A	14.7565	0	#N/A	15.7935	0	#N/A	20.1219	0	#N/A	20.6713	0	10.6686	12.9589	5.24533	#N/A	18.2832	0	#N/A	14.0925	0	#N/A	16.7541	0	#N/A	16.058	0	#N/A	14.9114	0	#N/A	18.2973	0	#N/A	14.5557	0	#N/A	14.8231	0	#N/A	14.5145	0	#N/A	13.7295	0
4-methylpentan-2-one	CC(C)CC(C)=O	4.84366	1.58622	10.6109	#N/A	8.06882	0	#N/A	8.4487	0	#N/A	13.2718	0	#N/A	13.7757	0	#N/A	5.83585	0	#N/A	12.1377	0	#N/A	6.98188	0	#N/A	10.2302	0	#N/A	9.3165	0	#N/A	8.81638	0	#N/A	11.7994	0	#N/A	7.34163	0	#N/A	8.73001	0	#N/A	8.14464	0	#N/A	7.2163	0
cyclopentanone	O=C1CCCC1	-1.30648	-3.97494	7.12067	#N/A	1.93766	0	3.48013	2.96803	0.262249	#N/A	7.73521	0	#N/A	8.39629	0	0.456411	-0.316174	0.596887	#N/A	6.90669	0	#N/A	1.27109	0	#N/A	4.68778	0	#N/A	3.6411	0	#N/A	2.94903	0	6.50386	6.24123	0.0689707	#N/A	1.72115	0	#N/A	3.37719	0	#N/A	2.54211	0	#N/A	1.51016	0
cyclohexanone	O=C1CCCCC1	1.09539	-2.69756	14.3864	#N/A	3.25187	0	5.53398	4.38916	1.31062	#N/A	9.31365	0	#N/A	10.0762	0	#N/A	1.04676	0	#N/A	8.32058	0	#N/A	2.6066	0	#N/A	6.09741	0	#N/A	5.0758	0	#N/A	4.14145	0	7.81604	7.72656	0.00800655	#N/A	3.10931	0	#N/A	4.60733	0	#N/A	3.80693	0	5.9961	2.77541	10.3728
cycloheptanone	O=C1CCCCCC1	5.45411	0.542099	24.1279	#N/A	6.47999	0	#N/A	7.76006	0	#N/A	12.8797	0	#N/A	13.7252	0	#N/A	4.37139	0	#N/A	11.521	0	#N/A	5.93496	0	#N/A	9.36686	0	#N/A	8.41603	0	#N/A	7.02547	0	#N/A	11.1753	0	#N/A	6.48343	0	#N/A	7.47737	0	#N/A	6.77483	0	#N/A	5.76048	0
cyclooctanone	O=C1CCCCCCC1	9.13392	4.31204	23.2506	#N/A	9.58411	0	#N/A	11.2409	0	#N/A	15.9048	0	#N/A	16.6971	0	#N/A	7.79505	0	#N/A	14.3746	0	#N/A	9.31508	0	#N/A	12.479	0	#N/A	11.6538	0	#N/A	9.72835	0	#N/A	14.0455	0	#N/A	9.88776	0	#N/A	10.3606	0	#N/A	9.76752	0	#N/A	8.8249	0
phenol	Oc1ccccc1	-6.18437	-3.14375	9.24538	#N/A	14.3018	0	-1.71154	1.74759	11.9656	3.65129	5.16297	2.28519	1.82564	3.5204	2.87219	#N/A	11.8851	0	#N/A	12.5928	0	2.1109	3.22066	1.23157	#N/A	12.5586	0	#N/A	12.0714	0	#N/A	18.8058	0	3.48013	6.06768	6.6954	1.42628	2.01912	0.351454	#N/A	15.4555	0	#N/A	15.7151	0	#N/A	15.6141	0
3-methylphenol	Cc1cccc(O)c1	-1.65449	0.372503	4.1087	#N/A	17.3061	0	#N/A	5.41723	0	#N/A	8.84164	0	5.07757	7.28873	4.88922	#N/A	14.954	0	#N/A	15.5701	0	#N/A	6.6384	0	#N/A	15.5754	0	#N/A	15.1251	0	#N/A	21.5415	0	2.68141	9.50235	46.5251	#N/A	5.54539	0	#N/A	18.1788	0	#N/A	18.5164	0	#N/A	18.4263	0
4-methylphenol	Cc1ccc(O)cc1	-1.07257	-0.0293176	1.08837	#N/A	16.9116	0	1.25513	5.28287	16.2227	6.56091	8.70201	4.58432	6.04745	7.14421	1.2029	#N/A	14.6092	0	#N/A	15.6922	0	5.07757	6.30231	1.49999	#N/A	15.6572	0	#N/A	15.1595	0	#N/A	21.1018	0	6.73206	9.30489	6.61943	4.56411	5.24841	0.468271	#N/A	18.1292	0	#N/A	18.3339	0	#N/A	18.1666	0
3,4-dimethylphenol	Cc1ccc(O)cc1C	1.19808	3.54564	5.51106	#N/A	19.7625	0	#N/A	9.16251	0	#N/A	12.583	0	#N/A	11.1431	0	#N/A	17.5242	0	#N/A	18.7821	0	#N/A	9.78386	0	#N/A	18.76	0	#N/A	18.2641	0	#N/A	23.6065	0	#N/A	12.8706	0	6.96027	8.87796	3.67756	#N/A	20.8419	0	#N/A	21.0408	0	#N/A	20.8292	0
3,5-dimethylphenol	Cc1cc(C)cc(O)c1	1.46052	3.84349	5.67858	#N/A	20.4255	0	4.67821	9.03931	19.0192	#N/A	12.5492	0	#N/A	11.0535	0	#N/A	18.1626	0	#N/A	18.6914	0	#N/A	10.1036	0	#N/A	18.7645	0	#N/A	18.3649	0	#N/A	24.2504	0	#N/A	13.022	0	7.18847	9.08552	3.59879	#N/A	20.9645	0	#N/A	21.363	0	#N/A	21.2678	0
3-chlorophenol	Oc1cccc([Cl])c1	-0.439296	1.3554	3.22095	#N/A	22.0692	0	2.79552	5.62329	7.99631	7.30258	8.92716	2.63928	5.81924	6.90237	1.17316	#N/A	19.5997	0	#N/A	18.1015	0	#N/A	8.12542	0	#N/A	18.7751	0	#N/A	18.5422	0	#N/A	27.4226	0	7.30258	10.4306	9.78433	5.70514	6.46372	0.575441	#N/A	22.5156	0	#N/A	23.2942	0	#N/A	23.5305	0
4-chlorophenol	Oc1ccc([Cl])cc1	-2.19648	-0.13369	4.25509	#N/A	21.3301	0	2.28205	4.50204	4.92832	#N/A	7.93728	0	#N/A	5.83783	0	#N/A	18.764	0	#N/A	17.6879	0	#N/A	6.90077	0	#N/A	18.2996	0	#N/A	17.9864	0	#N/A	26.9746	0	7.58783	9.49661	3.64342	5.93334	5.22469	0.502195	#N/A	22.2017	0	#N/A	22.8598	0	#N/A	23.032	0
3,4-dichlorophenol	Oc1ccc([Cl])c([Cl])c1	0.342308	0.503576	0.0260071	#N/A	25.1743	0	#N/A	4.71919	0	#N/A	8.49107	0	#N/A	6.071	0	#N/A	22.4842	0	#N/A	19.964	0	#N/A	8.18534	0	#N/A	20.9577	0	#N/A	20.8162	0	#N/A	31.5149	0	#N/A	10.7189	0	#N/A	6.08642	0	#N/A	25.4923	0	#N/A	26.5264	0	#N/A	26.9415	0
3,5-dichlorophenol	Oc1cc([Cl])cc([Cl])c1	2.24782	2.53037	0.0798337	#N/A	28.0434	0	#N/A	6.49048	0	#N/A	10.3709	0	#N/A	7.85542	0	#N/A	25.401	0	#N/A	22.2013	0	#N/A	10.3912	0	#N/A	23.4	0	#N/A	23.3764	0	#N/A	34.3216	0	#N/A	12.801	0	#N/A	8.13992	0	#N/A	27.8715	0	#N/A	29.0952	0	#N/A	29.6121	0
chloroethane	[Cl]CC	6.94886	7.07704	0.016431	#N/A	12.2567	0	#N/A	10.6067	0	#N/A	12.2036	0	#N/A	11.2215	0	#N/A	10.3059	0	#N/A	11.7644	0	#N/A	10.8055	0	#N/A	11.4983	0	#N/A	10.9924	0	#N/A	13.0652	0	#N/A	11.6575	0	9.75578	10.3597	0.36477	#N/A	11.6055	0	#N/A	11.5368	0	#N/A	11.1045	0
1-chloropropane	CCC[Cl]	11.1935	10.4963	0.486069	#N/A	15.9097	0	14.0917	14.0402	0.00265409	#N/A	15.7693	0	13.7494	14.7081	0.919175	#N/A	13.9408	0	#N/A	14.9871	0	#N/A	14.3743	0	#N/A	14.8523	0	#N/A	14.4127	0	#N/A	16.4811	0	14.0917	15.2287	1.29272	#N/A	13.8866	0	#N/A	14.7158	0	14.0346	14.7867	0.56557	13.9719	14.3978	0.181375
1-chlorobutane	CCCC[Cl]	14.8448	14.1498	0.483009	17.6289	19.6635	4.13982	17.3436	17.6888	0.119126	#N/A	19.4945	0	#N/A	18.3819	0	16.4878	17.7498	1.59252	#N/A	18.3863	0	#N/A	18.1065	0	#N/A	18.4003	0	#N/A	18.0429	0	#N/A	19.9315	0	17.8571	18.9179	1.12528	17.5148	17.598	0.00692597	17.1154	17.9719	0.7336	#N/A	18.1797	0	#N/A	17.8362	0
1,3-dichloropropane	[Cl]CCC[Cl]	9.79002	9.91707	0.0161427	#N/A	20.6597	0	13.8064	13.6487	0.0248862	#N/A	16.0071	0	#N/A	14.5036	0	#N/A	17.5902	0	#N/A	16.5055	0	#N/A	14.9156	0	#N/A	16.7756	0	#N/A	16.2803	0	#N/A	23.6213	0	#N/A	16.1767	0	#N/A	13.9628	0	15.6321	19.124	12.1932	#N/A	19.643	0	#N/A	19.5384	0
1-chloropentane	CCCCC[Cl]	18.1024	18.567	0.215819	#N/A	23.6338	0	#N/A	22.055	0	#N/A	23.6608	0	#N/A	22.6348	0	19.7398	21.8524	4.4631	#N/A	21.9904	0	#N/A	22.2663	0	#N/A	22.1695	0	#N/A	21.9027	0	23.4424	23.7641	0.103508	#N/A	22.8429	0	#N/A	21.8427	0	20.025	21.6186	2.53961	#N/A	21.9952	0	#N/A	21.7332	0
1-chloroheptane	CCCCCCC[Cl]	25.2053	26.6719	2.15084	#N/A	31.4555	0	#N/A	30.0689	0	#N/A	31.5086	0	#N/A	30.5063	0	#N/A	29.8931	0	#N/A	29.04	0	#N/A	30.1618	0	#N/A	29.5651	0	#N/A	29.488	0	#N/A	31.1554	0	#N/A	30.4141	0	#N/A	29.8001	0	#N/A	28.6294	0	#N/A	29.3264	0	#N/A	29.2039	0
naphthalene	c1ccc2ccccc2c1	19.4032	19.3397	0.00402542	22.5923	24.4331	3.38854	21.8507	23.8831	4.1309	23.8475	25.4067	2.43116	22.9347	24.3461	1.99208	#N/A	22.6471	0	22.0789	24.222	4.59285	#N/A	23.291	0	#N/A	24.3395	0	#N/A	23.878	0	24.3039	24.5791	0.0757316	23.5052	24.3115	0.650209	22.8776	23.0092	0.0173293	22.7635	23.465	0.4921	#N/A	23.4146	0	22.25	22.8851	0.403277
phenanthrene	c1ccc2c(c1)ccc3ccccc23	27.5672	25.861	2.91117	#N/A	31.6159	0	29.952	30.7708	0.670499	#N/A	32.3474	0	28.868	31.2032	5.45338	28.0693	29.6402	2.46773	28.1263	30.5998	6.11824	#N/A	30.0148	0	30.4654	30.9645	0.249023	30.7507	30.5339	0.0469912	32.0629	31.9454	0.0138055	#N/A	31.0889	0	#N/A	29.7388	0	31.1501	30.1474	1.00535	31.2071	30.2949	0.83208	31.5494	29.8271	2.96639
﻿anthracene	c1ccc2cc3ccccc3cc2c1	25.8899	25.9839	0.00883532	28.1834	31.9261	14.0082	29.3244	30.7753	2.10522	31.8917	32.4597	0.322654	30.6366	31.2635	0.393033	27.1565	29.9351	7.72084	26.4148	30.7305	18.6254	30.5225	30.248	0.0753643	28.7539	31.1311	5.65088	29.3244	30.7297	1.97475	32.4052	32.1145	0.0845202	#N/A	31.3161	0	30.9218	29.902	1.04007	29.6097	30.2154	0.366871	30.1802	30.3994	0.0480639	31.3783	29.9438	2.05774
pyrene	c1cc2ccc3cccc4ccc(c1)c2c34	30.4255	31.3591	0.871573	31.8347	37.1362	28.1067	32.9757	35.4484	6.11432	#N/A	36.9576	0	35.0295	35.8325	0.644687	30.7507	35.126	19.1432	29.7238	34.2063	20.0933	34.1167	35.27	1.33006	32.4622	34.9072	5.9777	33.261	34.7127	2.10768	36.1135	37.3961	1.64499	35.1436	35.7668	0.388354	#N/A	34.8769	0	33.2039	34.2764	1.15019	34.2308	34.9618	0.534349	35.0866	34.7843	0.0913784
pyridine	c1ccncc1	-2.38475	-1.42601	0.919185	#N/A	4.14263	0	1.8827	4.26455	5.67323	#N/A	8.08807	0	7.35963	8.63074	1.61572	#N/A	2.00783	0	#N/A	7.19392	0	2.45321	3.12955	0.457443	#N/A	5.58777	0	#N/A	4.76321	0	#N/A	5.3963	0	4.1077	6.78704	7.17887	#N/A	3.39843	0	3.02372	5.04328	4.0786	2.85257	4.54763	2.87323	#N/A	3.77435	0
acetonitrile	CC#N	-6.33841	-7.84875	2.28115	-1.08398	2.00206	9.5236	-3.59424	-2.97742	0.380466	3.42308	0.383376	9.23981	2.28205	-0.331357	6.82992	-4.16475	-0.957887	10.284	#N/A	1.9412	0	#N/A	-2.68913	0	3.53719	0.815918	7.4053	#N/A	-0.0850809	0	1.71154	5.27205	12.6772	2.16795	0.290473	3.52493	-0.627565	-3.17302	6.47936	-0.228205	2.87573	9.63439	2.39616	2.59969	0.0414237	1.71725	2.09127	0.139893
propionitrile	CCC#N	-4.21039	-2.71466	2.23723	#N/A	5.14823	0	-0.285257	2.23819	6.36776	#N/A	5.48521	0	#N/A	4.94591	0	#N/A	2.43018	0	#N/A	5.70235	0	#N/A	2.14213	0	#N/A	4.54535	0	#N/A	3.69393	0	#N/A	7.46047	0	4.73526	5.00278	0.0715644	2.51026	1.84456	0.44316	#N/A	5.51996	0	#N/A	5.24075	0	#N/A	4.66606	0
1-cyanopropane	CCCC#N	-0.696027	0.442533	1.29632	#N/A	8.62193	0	#N/A	5.43654	0	#N/A	8.91815	0	#N/A	8.30412	0	#N/A	5.79137	0	#N/A	8.68397	0	#N/A	5.53315	0	#N/A	7.61756	0	#N/A	6.81275	0	#N/A	10.7526	0	#N/A	8.47696	0	#N/A	5.17924	0	#N/A	8.36934	0	#N/A	8.2339	0	#N/A	7.69675	0
1-cyanobutane	CCCCC#N	3.01231	3.88138	0.755271	#N/A	12.2106	0	#N/A	8.89903	0	#N/A	12.5384	0	#N/A	11.8787	0	#N/A	9.37551	0	#N/A	11.9109	0	#N/A	9.11594	0	#N/A	10.9593	0	#N/A	10.2221	0	#N/A	14.0586	0	#N/A	12.0851	0	#N/A	8.73289	0	#N/A	11.4096	0	#N/A	11.4081	0	#N/A	10.9082	0
biphenyl	c1ccc(cc1)c1ccccc1	23.1857	25.0263	3.38807	24.8173	30.3115	30.1859	27.4417	29.4956	4.21856	28.1834	31.0654	8.30614	26.643	29.9502	10.9374	25.9013	28.529	6.90489	26.7	29.2662	6.5853	#N/A	29.0247	0	#N/A	29.6288	0	#N/A	29.2884	0	#N/A	30.2302	0	27.9552	29.9014	3.78769	27.6129	28.7123	1.20869	#N/A	28.5546	0	#N/A	28.7671	0	#N/A	28.3456	0
ammonia	N	-16.3794	-15.5553	0.679282	#N/A	-6.49433	0	-13.6923	-10.1305	12.6866	#N/A	-5.95537	0	-8.1013	-5.86705	4.99184	#N/A	-9.3249	0	#N/A	-4.37519	0	#N/A	-10.2949	0	#N/A	-6.18785	0	#N/A	-7.22492	0	#N/A	-3.3631	0	#N/A	-6.28905	0	-12.4943	-10.4572	4.14969	-9.75578	-4.61184	26.4602	-10.0981	-5.24116	23.5898	#N/A	-5.96103	0
t-butyl chloride	CC(C)(C)[Cl]	17.5319	11.3692	37.9784	18.7129	17.0116	2.89426	19.8539	15.0962	22.6353	#N/A	17.0499	0	#N/A	15.9084	0	#N/A	15.0447	0	#N/A	16.266	0	#N/A	15.4896	0	#N/A	16.1163	0	#N/A	15.6788	0	18.827	17.314	2.28896	19.5116	16.5486	8.77942	19.4545	14.9791	20.0293	#N/A	15.6477	0	#N/A	15.6999	0	19.774	15.2714	20.2737
tetrahydropyran	C1CCOCC1	4.03353	-1.17899	27.1704	#N/A	3.1274	0	#N/A	5.52051	0	#N/A	9.70017	0	11.2391	10.4462	0.628774	#N/A	1.67237	0	#N/A	9.06297	0	#N/A	3.44813	0	#N/A	7.04675	0	#N/A	6.1627	0	#N/A	3.02575	0	#N/A	7.89058	0	#N/A	4.04112	0	#N/A	4.83143	0	#N/A	3.90139	0	#N/A	2.83552	0
tetrahydrofuran	C1CCOC1	0.43359	-7.95858	70.4285	#N/A	-3.30435	0	3.25193	-0.601558	14.8494	#N/A	4.24162	0	7.41668	5.35473	4.25164	1.31218	-5.02386	40.1455	#N/A	3.88117	0	#N/A	-2.96457	0	#N/A	1.32463	0	#N/A	0.228587	0	3.30898	-2.89749	38.5203	4.3359	2.40202	3.73993	2.33911	-2.22262	20.8094	2.62436	-0.730481	11.255	#N/A	-1.951	0	#N/A	-3.18645	0
tetrahydrothiophene	C1CCSC1	7.9929	8.2127	0.048312	#N/A	12.8726	0	#N/A	12.6509	0	#N/A	14.9623	0	#N/A	14.3369	0	#N/A	11.1466	0	#N/A	14.042	0	#N/A	12.189	0	#N/A	13.3504	0	#N/A	12.7987	0	#N/A	13.0301	0	#N/A	13.9787	0	#N/A	12.0414	0	#N/A	12.3886	0	#N/A	12.1884	0	#N/A	11.6094	0
4-ethylphenol	CCc1ccc(O)cc1	1.35212	4.06357	7.35199	#N/A	20.9338	0	4.90642	9.37994	20.0124	9.47053	12.7606	10.8244	8.38655	11.1808	7.80791	#N/A	18.815	0	#N/A	19.5504	0	#N/A	10.376	0	#N/A	19.7162	0	#N/A	19.3226	0	#N/A	24.6865	0	9.52758	13.2582	13.9177	7.41668	9.3303	3.66194	#N/A	21.7773	0	#N/A	22.0838	0	#N/A	21.9456	0
d-valerolactam	O=C1CCCCN1	-15.9059	-18.0025	4.39567	#N/A	-7.30015	0	#N/A	-7.82611	0	#N/A	0.362184	0	#N/A	2.6028	0	#N/A	-10.4381	0	#N/A	0.796609	0	#N/A	-10.547	0	#N/A	-2.80265	0	#N/A	-4.31353	0	#N/A	-4.14811	0	#N/A	-1.42251	0	#N/A	-9.48277	0	#N/A	-3.42388	0	#N/A	-4.71361	0	#N/A	-6.11839	0
N-methyl-delta-valerolactam	CN1C(=O)CCCC1	-5.35712	-7.28621	3.72137	#N/A	-0.623206	0	#N/A	1.9774	0	#N/A	8.96432	0	#N/A	10.9999	0	#N/A	-3.01909	0	#N/A	7.50447	0	#N/A	-0.93856	0	#N/A	4.32882	0	#N/A	3.05995	0	#N/A	0.457168	0	#N/A	6.74708	0	#N/A	0.19221	0	#N/A	1.99194	0	#N/A	0.807425	0	#N/A	-0.577999	0
n,n-dimethylacetamide	CN(C)C(C)=O	-13.6752	-16.2569	6.66513	#N/A	-8.46194	0	#N/A	-6.42594	0	#N/A	1.19768	0	-0.718847	3.61851	18.8127	#N/A	-11.2586	0	#N/A	0.413957	0	#N/A	-9.54114	0	#N/A	-3.26781	0	#N/A	-4.75687	0	#N/A	-6.22593	0	-4.14193	-0.949624	10.1908	#N/A	-8.28857	0	#N/A	-4.72156	0	#N/A	-6.12873	0	#N/A	-7.60991	0
n-methylpiperidine	CN1CCCCC1	2.73847	8.50615	33.2662	#N/A	12.1086	0	#N/A	13.9785	0	#N/A	17.476	0	7.75899	18.2652	110.38	#N/A	11.1	0	#N/A	15.9138	0	#N/A	12.4383	0	#N/A	14.7062	0	#N/A	14.2528	0	#N/A	11.3829	0	#N/A	15.6028	0	#N/A	12.9511	0	#N/A	12.3825	0	#N/A	12.0677	0	#N/A	11.3476	0
2-methylpiperidine	CC1CCCCN1	0.456411	5.98762	30.5943	#N/A	11.0878	0	#N/A	11.7629	0	#N/A	15.7237	0	#N/A	16.5452	0	#N/A	9.65016	0	#N/A	14.442	0	#N/A	10.3693	0	#N/A	13.1192	0	#N/A	12.5772	0	#N/A	11.2011	0	#N/A	14.0189	0	#N/A	10.8325	0	#N/A	11.4899	0	#N/A	11.2207	0	#N/A	10.5227	0
3-methylpiperidine	CC1CCCNC1	0.416475	5.56803	26.5386	#N/A	10.5959	0	#N/A	11.4865	0	#N/A	15.5115	0	#N/A	16.4754	0	#N/A	9.13997	0	#N/A	14.135	0	#N/A	9.92097	0	#N/A	12.7372	0	#N/A	12.1729	0	#N/A	10.8577	0	#N/A	13.7047	0	#N/A	10.4649	0	#N/A	11.1737	0	#N/A	10.8903	0	#N/A	10.1824	0
4-methylpiperidine	CC1CCNCC1	0.450706	5.59051	26.4176	#N/A	10.7329	0	#N/A	11.4822	0	#N/A	15.5279	0	#N/A	16.4385	0	#N/A	9.30812	0	#N/A	14.2743	0	#N/A	9.99687	0	#N/A	12.9053	0	#N/A	12.3532	0	#N/A	10.8897	0	#N/A	13.7732	0	#N/A	10.506	0	#N/A	11.2716	0	#N/A	10.9798	0	#N/A	10.2666	0
n-methyl-2-pyrrolidinone	CN1CCCC1=O	-10.8854	-14.889	16.0288	#N/A	-7.84466	0	#N/A	-4.71918	0	#N/A	3.20661	0	#N/A	5.90499	0	#N/A	-10.4649	0	#N/A	1.92558	0	#N/A	-8.11704	0	#N/A	-1.89407	0	#N/A	-3.36765	0	#N/A	-6.17557	0	#N/A	0.823936	0	#N/A	-6.69027	0	#N/A	-4.12157	0	#N/A	-5.60043	0	#N/A	-7.17421	0
dimethylsulfide	CSC	4.8893	2.72179	4.69813	#N/A	7.82201	0	#N/A	7.04298	0	#N/A	9.32975	0	#N/A	8.58691	0	#N/A	5.85514	0	#N/A	9.01348	0	#N/A	6.80582	0	#N/A	8.18215	0	#N/A	7.51393	0	#N/A	8.50056	0	#N/A	8.627	0	#N/A	6.5512	0	#N/A	7.78418	0	#N/A	7.43419	0	#N/A	6.81187	0
diethylsulfide	CCSCC	11.1307	12.6731	2.37889	#N/A	17.066	0	#N/A	17.0436	0	#N/A	19.2118	0	20.6526	18.5673	4.34853	#N/A	15.633	0	#N/A	18.1227	0	#N/A	16.5197	0	#N/A	17.6686	0	#N/A	17.2524	0	#N/A	16.6765	0	#N/A	18.0842	0	#N/A	16.4	0	#N/A	16.2218	0	#N/A	16.1353	0	#N/A	15.598	0
dipropylsulfide	CCCSCCC	17.5148	20.4734	8.75331	#N/A	24.7183	0	#N/A	24.8128	0	#N/A	26.9383	0	#N/A	26.3301	0	#N/A	23.4865	0	#N/A	25.0863	0	#N/A	24.2124	0	#N/A	24.9468	0	#N/A	24.7086	0	#N/A	23.8603	0	#N/A	25.5652	0	#N/A	24.1418	0	#N/A	23.0708	0	#N/A	23.283	0	#N/A	22.8681	0
diisopropylsulfide	CC(C)SC(C)C	15.1471	18.9555	14.5034	#N/A	23.1876	0	#N/A	23.2786	0	#N/A	25.3317	0	#N/A	24.7117	0	#N/A	21.908	0	#N/A	23.6508	0	#N/A	22.6735	0	#N/A	23.475	0	#N/A	23.1943	0	#N/A	22.4787	0	#N/A	24.0031	0	#N/A	22.5884	0	#N/A	21.7589	0	#N/A	21.8999	0	#N/A	21.4602	0
methylethylsulfide	CSCC	7.25693	6.5759	0.463807	#N/A	11.3841	0	#N/A	10.9408	0	#N/A	13.2193	0	#N/A	12.5088	0	#N/A	9.66649	0	#N/A	12.6521	0	#N/A	10.5986	0	#N/A	11.96	0	#N/A	11.3958	0	#N/A	11.5311	0	#N/A	12.3558	0	#N/A	10.397	0	#N/A	11.0313	0	#N/A	10.7645	0	#N/A	10.16	0
ethene	C=C	7.01161	4.03847	8.83957	#N/A	7.64324	0	8.61476	7.15771	2.12298	#N/A	8.41363	0	#N/A	7.63842	0	#N/A	6.19787	0	#N/A	8.22278	0	#N/A	7.23845	0	#N/A	7.85274	0	#N/A	7.399	0	8.78591	7.78019	1.01147	7.41668	7.76956	0.124525	7.93014	6.8904	1.08106	8.55771	7.44122	1.24654	#N/A	7.18836	0	7.65059	6.69276	0.917435
propene	CC=C	10.931	7.89404	9.22342	#N/A	11.4226	0	13.2359	11.0122	4.94501	#N/A	12.2711	0	#N/A	11.484	0	#N/A	10.1207	0	#N/A	11.778	0	#N/A	11.0793	0	#N/A	11.5675	0	#N/A	11.2083	0	#N/A	11.1979	0	#N/A	11.5252	0	#N/A	10.7465	0	#N/A	10.8192	0	11.9808	10.6914	1.66246	#N/A	10.2399	0
but-1-ene	C=CCC	14.4853	11.93	6.52995	#N/A	15.4567	0	16.2026	14.9836	1.48589	#N/A	16.2139	0	#N/A	15.3999	0	#N/A	14.3051	0	#N/A	15.4625	0	#N/A	15.0852	0	#N/A	15.4534	0	#N/A	15.2071	0	#N/A	14.8781	0	#N/A	15.3864	0	#N/A	14.7502	0	#N/A	14.3988	0	#N/A	14.4211	0	#N/A	14.0296	0
pent-1-ene	CCCC=C	18.6957	15.7105	8.9114	#N/A	19.319	0	#N/A	18.7301	0	#N/A	19.9818	0	#N/A	19.1362	0	#N/A	18.2446	0	#N/A	18.9082	0	#N/A	18.8811	0	#N/A	19.0684	0	#N/A	18.9142	0	#N/A	18.4894	0	18.9981	19.0904	0.00850933	19.6257	18.5384	1.18208	#N/A	17.7954	0	19.0552	17.9738	1.16942	18.5873	17.6449	0.888131
hex-1-ene	CCCCC=C	21.2916	21.8517	0.313723	#N/A	25.2146	0	22.5923	24.8108	4.92152	#N/A	25.9156	0	#N/A	25.1206	0	#N/A	24.2532	0	#N/A	24.1325	0	#N/A	24.8299	0	20.4814	24.5399	16.4711	20.5955	24.5132	15.3482	#N/A	24.195	0	#N/A	24.7884	0	#N/A	24.5472	0	#N/A	23.1037	0	#N/A	23.5371	0	#N/A	23.3245	0
hept-1-ene	CCCCCC=C	24.4351	25.9064	2.16478	#N/A	29.1672	0	#N/A	28.8143	0	#N/A	29.8268	0	#N/A	29.0378	0	#N/A	28.3108	0	#N/A	27.6696	0	#N/A	28.78	0	22.8205	28.2597	29.5839	23.334	28.3297	24.9564	#N/A	27.9509	0	#N/A	28.5662	0	#N/A	28.5242	0	#N/A	26.6497	0	#N/A	27.2467	0	#N/A	27.1064	0
oct-1-ene	CCCCCCC=C	28.4002	30.1774	3.15858	#N/A	33.1565	0	#N/A	33.0337	0	#N/A	33.8838	0	#N/A	33.1614	0	#N/A	32.368	0	#N/A	31.1673	0	#N/A	32.8463	0	26.9853	31.9226	24.3764	26.9282	32.0745	26.4837	#N/A	31.8917	0	#N/A	32.42	0	#N/A	32.6532	0	#N/A	30.2764	0	#N/A	31.056	0	#N/A	31.0044	0
non-1-ene	CCCCCCCC=C	31.8518	33.998	4.60639	#N/A	37.0387	0	#N/A	36.8244	0	#N/A	37.6717	0	#N/A	36.9132	0	#N/A	36.3682	0	#N/A	34.7061	0	#N/A	36.6685	0	#N/A	35.6443	0	#N/A	35.8965	0	#N/A	35.4666	0	#N/A	36.1352	0	#N/A	36.4717	0	#N/A	33.7216	0	#N/A	34.6444	0	#N/A	34.6479	0
dec-1-ene	CCCCCCCCC=C	35.2178	37.8874	7.12686	#N/A	40.9962	0	#N/A	40.67	0	#N/A	41.5255	0	#N/A	40.745	0	#N/A	40.406	0	#N/A	38.2264	0	#N/A	40.559	0	#N/A	39.3429	0	#N/A	39.6896	0	#N/A	39.1793	0	#N/A	39.9183	0	#N/A	40.3554	0	#N/A	37.2139	0	#N/A	38.2963	0	#N/A	38.3654	0
undec-1-ene	CCCCCCCCCC=C	38.6409	42.1174	12.0864	#N/A	44.9495	0	#N/A	44.8553	0	#N/A	45.5391	0	#N/A	44.8097	0	#N/A	44.4599	0	#N/A	41.7605	0	#N/A	44.5882	0	#N/A	43.0504	0	#N/A	43.4857	0	#N/A	43.0249	0	#N/A	43.7317	0	#N/A	44.4466	0	#N/A	40.8206	0	#N/A	42.0723	0	#N/A	42.2213	0
dodec-1-ene	CCCCCCCCCCC=C	42.1324	46.1734	16.3296	#N/A	48.9154	0	#N/A	48.8645	0	#N/A	49.4773	0	#N/A	48.7668	0	#N/A	48.4927	0	#N/A	45.2526	0	#N/A	48.5504	0	#N/A	46.7131	0	#N/A	47.2353	0	#N/A	46.85	0	#N/A	47.5383	0	#N/A	48.4341	0	#N/A	44.3666	0	#N/A	45.7901	0	#N/A	46.0163	0
n-methylformamide	CNC=O	-21.1489	-23.2935	4.59918	#N/A	-10.1317	0	#N/A	-14.4167	0	#N/A	-7.22828	0	#N/A	-5.84349	0	#N/A	-13.4829	0	#N/A	-4.44428	0	#N/A	-16.0738	0	#N/A	-7.54761	0	#N/A	-9.00507	0	#N/A	-5.5449	0	#N/A	-8.16965	0	#N/A	-15.5979	0	-6.73206	-6.0919	0.409807	#N/A	-7.16453	0	#N/A	-8.26436	0
n,n-dimethylformamide	CN(C)C=O	-14.588	-15.7519	1.35463	#N/A	-7.76803	0	#N/A	-6.70711	0	#N/A	0.336697	0	#N/A	2.15709	0	#N/A	-10.6116	0	#N/A	-0.0577145	0	#N/A	-9.17865	0	#N/A	-3.43324	0	#N/A	-4.86309	0	-7.64488	-5.608	4.14891	#N/A	-1.40027	0	#N/A	-8.255	0	-5.81924	-4.58796	1.51605	-5.87629	-5.89067	0.000206692	#N/A	-7.2681	0
n,n-dibutylformamide	CCCCN(C=O)CCCC	7.29117	7.50589	0.0461055	#N/A	14.1828	0	#N/A	16.2269	0	#N/A	22.8467	0	#N/A	24.6857	0	#N/A	12.0131	0	#N/A	20.0109	0	#N/A	13.5496	0	#N/A	17.5892	0	#N/A	16.6899	0	#N/A	14.6504	0	#N/A	20.3907	0	#N/A	14.6031	0	#N/A	14.8886	0	#N/A	14.4111	0	#N/A	13.3643	0
n-methylacetamide	CNC(C)=O	-22.2843	-20.8833	1.96265	#N/A	-6.91299	0	#N/A	-11.7446	0	#N/A	-4.27316	0	#N/A	-2.77223	0	#N/A	-9.95327	0	#N/A	-0.836937	0	#N/A	-13.44	0	#N/A	-3.82872	0	#N/A	-5.16953	0	#N/A	-2.62	0	#N/A	-5.27117	0	#N/A	-12.9351	0	#N/A	-2.85211	0	#N/A	-3.85506	0	#N/A	-4.93614	0
n-ethylacetamide	CCNC(C)=O	-16.408	-17.7003	1.67011	#N/A	-3.90031	0	#N/A	-8.35573	0	#N/A	-0.646919	0	#N/A	0.955002	0	#N/A	-6.94207	0	#N/A	2.14824	0	#N/A	-10.14	0	#N/A	-0.819926	0	#N/A	-2.12332	0	#N/A	0.094023	0	#N/A	-1.78789	0	#N/A	-9.56423	0	#N/A	-0.222536	0	#N/A	-1.14509	0	#N/A	-2.23001	0
n-butylacetamide	CCCCNC(C)=O	-11.3418	-9.51646	3.33191	#N/A	3.63048	0	#N/A	-0.152992	0	#N/A	7.41503	0	#N/A	9.12613	0	#N/A	0.969902	0	#N/A	9.42628	0	#N/A	-2.20419	0	#N/A	6.76543	0	#N/A	5.65967	0	#N/A	6.89498	0	#N/A	5.90162	0	#N/A	-1.49912	0	#N/A	6.65067	0	#N/A	5.97032	0	#N/A	4.97298	0
methylethylether	CCOC	0.296667	-2.81857	9.70471	#N/A	1.2651	0	#N/A	3.56891	0	#N/A	7.16791	0	#N/A	7.60168	0	#N/A	-0.175962	0	#N/A	7.06027	0	#N/A	1.58896	0	#N/A	5.17604	0	#N/A	4.25511	0	#N/A	1.29087	0	#N/A	5.52176	0	#N/A	2.06303	0	#N/A	3.2652	0	#N/A	2.21913	0	#N/A	1.13572	0
methylcyclohexylether	COC1CCCCC1	8.16405	8.14772	0.000266653	#N/A	12.3856	0	#N/A	14.5348	0	#N/A	18.3247	0	#N/A	18.8372	0	#N/A	11.1998	0	#N/A	17.1599	0	#N/A	12.5853	0	#N/A	15.703	0	#N/A	15.0514	0	#N/A	11.68	0	#N/A	16.3953	0	#N/A	13.1041	0	#N/A	13.0998	0	#N/A	12.5082	0	#N/A	11.6013	0
undecan-1-ol	CCCCCCCCCCCO	20.6982	24.965	18.2054	#N/A	35.5083	0	#N/A	31.0119	0	#N/A	34.7221	0	#N/A	34.7555	0	#N/A	34.1012	0	#N/A	34.9297	0	#N/A	29.8559	0	#N/A	34.8922	0	#N/A	34.7765	0	#N/A	36.8471	0	#N/A	33.0181	0	#N/A	29.9582	0	#N/A	34.5003	0	#N/A	35.2969	0	#N/A	35.2024	0
dodecan-1-ol	CCCCCCCCCCCCO	23.8475	31.5181	58.8386	#N/A	42.0654	0	#N/A	36.8909	0	#N/A	39.9918	0	#N/A	39.7716	0	#N/A	40.9684	0	#N/A	40.1661	0	#N/A	36.0325	0	#N/A	40.7016	0	#N/A	40.8381	0	#N/A	43.0495	0	#N/A	38.3059	0	#N/A	36.0047	0	#N/A	40.2578	0	#N/A	41.4003	0	#N/A	41.5128	0
tridecan-1-ol	CCCCCCCCCCCCCO	27.1393	32.69	30.8102	#N/A	42.8138	0	#N/A	38.5741	0	#N/A	42.4575	0	#N/A	42.5703	0	#N/A	41.4219	0	#N/A	41.2092	0	#N/A	37.5378	0	#N/A	41.3946	0	#N/A	41.4507	0	#N/A	43.6292	0	#N/A	40.5592	0	#N/A	37.6773	0	#N/A	40.5418	0	#N/A	41.7184	0	#N/A	41.7676	0
tetradecan-1-ol	CCCCCCCCCCCCCCO	30.6708	36.3786	32.5787	#N/A	46.7078	0	#N/A	42.2437	0	#N/A	46.0596	0	#N/A	46.2183	0	#N/A	45.3149	0	#N/A	44.4823	0	#N/A	41.1387	0	#N/A	44.8301	0	#N/A	44.9609	0	#N/A	47.6653	0	#N/A	44.0326	0	#N/A	41.3034	0	#N/A	44.1006	0	#N/A	45.4804	0	#N/A	45.6342	0
pentadecan-1-ol	CCCCCCCCCCCCCCCO	34.2651	40.4501	38.2544	#N/A	51.0427	0	#N/A	46.2111	0	#N/A	49.9234	0	#N/A	50.005	0	39.5366	49.7942	105.219	#N/A	48.3011	0	#N/A	45.1735	0	#N/A	48.9038	0	#N/A	49.1553	0	#N/A	51.7917	0	#N/A	47.8517	0	#N/A	45.3048	0	#N/A	48.0242	0	#N/A	49.5797	0	#N/A	49.8199	0
hexadecan-1-ol	CCCCCCCCCCCCCCCCO	37.8479	44.6643	46.4641	45.0135	55.0185	100.099	#N/A	50.5278	0	#N/A	54.0577	0	#N/A	54.1513	0	43.4161	54.0369	112.802	#N/A	52.3354	0	#N/A	49.2489	0	#N/A	53.1407	0	#N/A	53.4823	0	#N/A	55.3953	0	#N/A	51.7737	0	#N/A	49.448	0	#N/A	51.9064	0	#N/A	53.5202	0	#N/A	53.7781	0
heptadecan-1-ol	CCCCCCCCCCCCCCCCCO	41.4421	48.6874	52.4937	#N/A	58.4728	0	#N/A	54.4383	0	#N/A	58.0437	0	#N/A	58.2655	0	#N/A	57.4149	0	#N/A	55.1588	0	#N/A	53.1472	0	#N/A	56.0161	0	#N/A	56.4266	0	#N/A	58.6918	0	#N/A	55.5859	0	#N/A	53.4128	0	#N/A	54.6355	0	#N/A	56.476	0	#N/A	56.8223	0
octadecan-1-ol	CCCCCCCCCCCCCCCCCCO	44.9679	52.6465	58.9616	52.4873	62.4247	98.7531	#N/A	58.3656	0	#N/A	61.8712	0	#N/A	62.1523	0	50.4905	61.5078	121.382	#N/A	58.7235	0	#N/A	56.9682	0	#N/A	59.7628	0	#N/A	60.2754	0	#N/A	62.5398	0	#N/A	59.2494	0	#N/A	57.2793	0	#N/A	58.2928	0	#N/A	60.3075	0	#N/A	60.7414	0
nonadecan-1-ol	CCCCCCCCCCCCCCCCCCCO	48.5108	57.6394	83.3322	#N/A	67.3682	0	#N/A	63.331	0	#N/A	66.3478	0	#N/A	66.5154	0	#N/A	66.7395	0	#N/A	63.4018	0	#N/A	61.7011	0	#N/A	64.8034	0	#N/A	65.4307	0	#N/A	67.2753	0	#N/A	63.541	0	#N/A	62.0275	0	#N/A	63.183	0	#N/A	65.2877	0	#N/A	65.7762	0
eicosan-1-ol	CCCCCCCCCCCCCCCCCCCCO	52.0708	60.0215	63.2144	#N/A	70.2385	0	#N/A	65.6505	0	#N/A	69.2944	0	#N/A	69.4499	0	#N/A	69.3315	0	#N/A	65.4401	0	#N/A	64.5063	0	#N/A	66.8172	0	#N/A	67.496	0	#N/A	69.9583	0	#N/A	66.6449	0	#N/A	64.7429	0	#N/A	65.0167	0	#N/A	67.3682	0	#N/A	67.9343	0
adamantan-1-ol	OC12CC3CC(C1)CC(C2)C3	2.76129	3.78383	1.0456	#N/A	14.5107	0	#N/A	10.3179	0	#N/A	14.8534	0	#N/A	14.8361	0	#N/A	12.5397	0	#N/A	16.6096	0	#N/A	9.47753	0	#N/A	15.4975	0	#N/A	14.8511	0	#N/A	16.2974	0	#N/A	13.8528	0	#N/A	9.4633	0	#N/A	15.3968	0	#N/A	15.2294	0	#N/A	14.6443	0
propan-2-ol	CC(C)O	-9.79002	-9.69226	0.00955689	#N/A	1.90315	0	-7.75899	-3.26542	20.1921	#N/A	1.21137	0	-1.9968	1.02713	9.14414	#N/A	-0.367895	0	#N/A	4.84882	0	-5.30578	-3.82071	2.20544	#N/A	3.32301	0	-1.36923	2.41405	14.3132	-0.228205	4.70517	24.3382	#N/A	0.749671	0	#N/A	-4.00666	0	#N/A	4.21023	0	-0.855771	3.59669	19.8244	#N/A	2.86572	0
butan-2-ol	CCC(C)O	-6.0018	-3.31291	7.23015	#N/A	8.25564	0	-3.08077	2.44205	30.5016	#N/A	6.39717	0	1.71154	5.95977	18.0474	#N/A	6.14574	0	#N/A	9.70186	0	#N/A	2.24012	0	#N/A	8.69377	0	#N/A	8.00625	0	#N/A	10.8117	0	#N/A	5.98042	0	-1.54039	1.915	11.9397	#N/A	9.62095	0	2.33911	9.3761	49.5193	#N/A	8.85612	0
pentan-2-ol	CCCC(C)O	-2.16795	1.33454	12.2675	#N/A	12.4827	0	1.31218	6.95948	31.892	#N/A	10.6503	0	#N/A	10.2542	0	#N/A	10.5596	0	#N/A	13.4979	0	#N/A	6.59986	0	#N/A	12.7092	0	#N/A	12.1403	0	#N/A	14.83	0	4.45001	10.016	30.98	#N/A	6.34025	0	#N/A	13.4784	0	#N/A	13.4194	0	#N/A	12.9933	0
2-methylbutan-2-ol	CCC(C)(C)O	-3.41167	-3.11883	0.0857581	#N/A	8.01292	0	-0.684616	3.18931	15.0073	#N/A	7.52678	0	2.39616	7.32347	24.2784	#N/A	5.83298	0	#N/A	10.2442	0	#N/A	2.59858	0	#N/A	8.98804	0	#N/A	8.20954	0	#N/A	10.3979	0	#N/A	6.87104	0	#N/A	2.44161	0	#N/A	9.53535	0	#N/A	9.16063	0	#N/A	8.52193	0
2-methylpropan-2-ol	CC(C)(C)O	-7.51367	-6.14529	1.87246	#N/A	5.29295	0	-3.9936	0.341708	18.7949	#N/A	4.92335	0	0.0570514	4.76597	22.1739	#N/A	2.92648	0	#N/A	7.7908	0	-3.25193	-0.23494	9.10222	#N/A	6.33351	0	0.513462	5.45962	24.4644	#N/A	7.97379	0	#N/A	4.351	0	#N/A	-0.39208	0	#N/A	7.07506	0	0.969873	6.60375	31.7405	#N/A	5.91377	0
2-methylpentan-2-ol	CCCC(C)(C)O	-0.0570514	0.676837	0.538592	#N/A	11.5712	0	#N/A	7.03298	0	#N/A	11.2977	0	#N/A	11.1752	0	#N/A	9.54522	0	#N/A	13.6395	0	#N/A	6.2528	0	#N/A	12.5106	0	#N/A	11.8158	0	#N/A	13.7579	0	#N/A	10.4327	0	#N/A	6.17753	0	#N/A	12.8466	0	#N/A	12.603	0	#N/A	12.0202	0
2-methylhexan-2-ol	CCCCC(C)(C)O	3.57142	7.28706	13.806	#N/A	18.0384	0	#N/A	13.4178	0	#N/A	17.5232	0	#N/A	17.41	0	#N/A	16.1018	0	#N/A	19.1119	0	#N/A	12.6772	0	#N/A	18.2982	0	#N/A	17.7629	0	#N/A	20.0149	0	#N/A	16.4968	0	#N/A	12.6057	0	#N/A	18.51	0	#N/A	18.5854	0	#N/A	18.155	0
cyclopentanol	OC1CCCC1	-4.50135	-5.55335	1.1067	#N/A	5.87819	0	#N/A	0.822959	0	#N/A	5.23769	0	#N/A	5.10371	0	#N/A	3.82487	0	#N/A	8.59664	0	#N/A	0.201093	0	#N/A	7.25722	0	#N/A	6.46776	0	#N/A	8.32245	0	#N/A	4.62169	0	#N/A	0.0559584	0	3.25193	7.82931	20.9525	#N/A	7.36447	0	#N/A	6.69865	0
cyclohexanol	OC1CCCCC1	-1.43769	-2.01241	0.330295	#N/A	9.13595	0	#N/A	4.47981	0	#N/A	8.9939	0	6.38975	8.90289	6.31585	#N/A	7.09751	0	#N/A	11.6863	0	#N/A	3.76425	0	#N/A	10.4119	0	#N/A	9.66636	0	#N/A	11.2862	0	#N/A	8.22805	0	#N/A	3.67495	0	6.16155	10.6734	20.3571	#N/A	10.3042	0	#N/A	9.65257	0
cycloheptanol	OC1CCCCCC1	2.20789	0.910431	1.6834	#N/A	11.4722	0	#N/A	7.25908	0	#N/A	11.5339	0	#N/A	11.5358	0	#N/A	9.48882	0	#N/A	13.634	0	#N/A	6.38507	0	#N/A	12.4675	0	#N/A	11.7791	0	#N/A	13.6071	0	#N/A	10.5751	0	#N/A	6.36689	0	#N/A	12.7565	0	#N/A	12.522	0	#N/A	11.9433	0
cyclooctanol	OC1CCCCCCC1	7.09719	5.53942	2.42666	#N/A	15.3067	0	#N/A	11.8368	0	#N/A	15.9373	0	#N/A	16.094	0	#N/A	13.5262	0	#N/A	17.2868	0	#N/A	10.703	0	#N/A	16.2588	0	#N/A	15.6718	0	#N/A	17.0997	0	#N/A	14.6749	0	#N/A	10.8097	0	#N/A	16.2415	0	#N/A	16.1563	0	#N/A	15.6404	0
adamantane	C1C2CC3CC1CC(C2)C3	27.4645	28.7737	1.71399	#N/A	31.4067	0	#N/A	30.8155	0	#N/A	31.5351	0	#N/A	30.8894	0	#N/A	30.9448	0	#N/A	29.0358	0	#N/A	31.1273	0	#N/A	29.9181	0	#N/A	30.2409	0	#N/A	29.7207	0	#N/A	30.2473	0	#N/A	30.8417	0	#N/A	28.2106	0	#N/A	29.1283	0	#N/A	29.1945	0
cyclohexylmethylketone	CC(=O)C1CCCCC1	7.64488	6.33823	1.70734	#N/A	12.2222	0	#N/A	13.078	0	#N/A	17.7382	0	#N/A	18.3105	0	#N/A	10.3537	0	#N/A	16.2264	0	#N/A	11.4854	0	#N/A	14.5301	0	#N/A	13.7678	0	#N/A	12.3555	0	#N/A	16.047	0	#N/A	11.9195	0	#N/A	12.5179	0	#N/A	12.0728	0	#N/A	11.2061	0
2-methylcyclohexanone	CC1CCCCC1=O	5.61956	1.23764	19.2012	#N/A	6.84318	0	#N/A	8.37006	0	#N/A	13.2651	0	#N/A	14.1453	0	#N/A	4.79919	0	#N/A	11.8002	0	#N/A	6.40911	0	#N/A	9.69344	0	#N/A	8.759	0	#N/A	7.45181	0	#N/A	11.4595	0	#N/A	6.99988	0	#N/A	7.9036	0	#N/A	7.22959	0	#N/A	6.24498	0
cyclopropane	C1CC1	10.6344	8.49116	4.59337	#N/A	12.0566	0	#N/A	11.5745	0	#N/A	12.7862	0	#N/A	11.9948	0	#N/A	10.7746	0	#N/A	12.3463	0	#N/A	11.6776	0	#N/A	12.2083	0	#N/A	11.8628	0	#N/A	11.7778	0	#N/A	12.0538	0	#N/A	11.3193	0	#N/A	11.4317	0	#N/A	11.2984	0	#N/A	10.843	0
propylcyclopentane	CCCC1CCCC1	30.5967	28.5618	4.14068	#N/A	31.2712	0	#N/A	30.657	0	#N/A	31.3923	0	#N/A	30.712	0	#N/A	30.7954	0	#N/A	28.9974	0	#N/A	30.9702	0	#N/A	29.8734	0	#N/A	30.1858	0	#N/A	29.5602	0	#N/A	30.1255	0	#N/A	30.6739	0	#N/A	28.0968	0	#N/A	28.9821	0	#N/A	29.0245	0
pentylcyclopentane	CCCCCC1CCCC1	36.9122	38.7823	3.49697	#N/A	41.1643	0	#N/A	40.7616	0	#N/A	41.2596	0	#N/A	40.6361	0	#N/A	40.8927	0	#N/A	37.7697	0	#N/A	40.8982	0	#N/A	39.0784	0	#N/A	39.6135	0	#N/A	39.0869	0	#N/A	39.6281	0	#N/A	40.6847	0	#N/A	36.9855	0	#N/A	38.2935	0	#N/A	38.5267	0
propylcyclohexane	CCCC1CCCCC1	32.137	32.946	0.654417	#N/A	35.335	0	#N/A	34.9581	0	#N/A	35.5177	0	#N/A	34.9226	0	#N/A	34.9024	0	#N/A	32.4649	0	#N/A	35.1183	0	#N/A	33.5044	0	#N/A	33.8981	0	#N/A	33.6401	0	#N/A	34.0377	0	#N/A	34.8891	0	#N/A	31.7696	0	#N/A	32.8623	0	#N/A	33.01	0
butylcyclohexane	CCCCC1CCCCC1	35.6343	36.7903	1.33636	#N/A	39.2316	0	#N/A	38.7716	0	#N/A	39.3225	0	#N/A	38.695	0	#N/A	38.9182	0	#N/A	36.0155	0	#N/A	38.9572	0	#N/A	37.2392	0	#N/A	37.7332	0	#N/A	37.2347	0	#N/A	37.7653	0	#N/A	38.7263	0	#N/A	35.2336	0	#N/A	36.4701	0	#N/A	36.6739	0
t-butylcyclohexane	CC(C)(C)C1CCCCC1	33.5633	32.4346	1.27405	#N/A	35.1936	0	#N/A	34.4843	0	#N/A	35.2122	0	#N/A	34.5155	0	#N/A	34.7376	0	#N/A	32.3889	0	#N/A	34.8284	0	#N/A	33.4285	0	#N/A	33.822	0	#N/A	33.3474	0	#N/A	33.8674	0	#N/A	34.5291	0	#N/A	31.534	0	#N/A	32.5936	0	#N/A	32.7102	0
2-methylpyridine	Cc1ccccn1	0.125513	5.27266	26.4931	#N/A	10.3801	0	#N/A	10.9252	0	#N/A	14.5134	0	9.81284	15.0012	26.9187	#N/A	8.49194	0	#N/A	13.0974	0	5.13462	9.6585	20.4654	#N/A	11.7918	0	#N/A	11.102	0	#N/A	11.0658	0	#N/A	12.9969	0	#N/A	9.9568	0	#N/A	10.7295	0	#N/A	10.3937	0	#N/A	9.67674	0
3-methylpyridine	Cc1cccnc1	0.747373	3.16016	5.82154	#N/A	8.7372	0	#N/A	9.3105	0	#N/A	13.382	0	10.7827	14.0322	10.5592	#N/A	6.65346	0	#N/A	11.9922	0	#N/A	7.90735	0	#N/A	10.4512	0	#N/A	9.65902	0	#N/A	9.65868	0	#N/A	11.8499	0	#N/A	8.28063	0	#N/A	9.38858	0	#N/A	8.93852	0	#N/A	8.13032	0
4-methylpyridine	Cc1ccncc1	0.114103	2.36664	5.07391	#N/A	8.28261	0	4.79232	8.76335	15.7691	#N/A	12.9964	0	#N/A	13.6565	0	#N/A	6.09387	0	#N/A	11.7504	0	#N/A	7.30883	0	#N/A	10.1467	0	#N/A	9.29748	0	#N/A	9.32958	0	#N/A	11.4861	0	#N/A	7.68411	0	#N/A	9.11307	0	#N/A	8.58368	0	#N/A	7.72081	0
2,3-dimethylpyridine	Cc1cccnc1C	2.88109	6.62492	14.0162	#N/A	11.5563	0	#N/A	12.6058	0	#N/A	16.2681	0	#N/A	16.888	0	#N/A	9.71512	0	#N/A	14.6806	0	#N/A	11.0341	0	#N/A	13.3427	0	#N/A	12.6338	0	#N/A	12.1639	0	#N/A	14.5626	0	#N/A	11.4402	0	#N/A	12.065	0	#N/A	11.6779	0	#N/A	10.9104	0
2,4-dimethylpyridine	Cc1ccnc(C)c1	2.48744	7.20144	22.2218	#N/A	12.7038	0	#N/A	13.4088	0	#N/A	17.4361	0	#N/A	18.027	0	#N/A	10.753	0	#N/A	15.8203	0	#N/A	11.9651	0	#N/A	14.4598	0	#N/A	13.7429	0	#N/A	13.2319	0	#N/A	15.8098	0	#N/A	12.337	0	#N/A	13.0133	0	#N/A	12.6386	0	#N/A	11.8442	0
2,5-dimethylpyridine	Cc1ccc(C)nc1	3.0009	8.31177	28.2053	#N/A	13.257	0	#N/A	14.3596	0	#N/A	18.1029	0	#N/A	18.7494	0	#N/A	11.4559	0	#N/A	16.3423	0	#N/A	12.7697	0	#N/A	15.0509	0	#N/A	14.3755	0	#N/A	13.7064	0	#N/A	16.3449	0	#N/A	13.1935	0	#N/A	13.5907	0	#N/A	13.2512	0	#N/A	12.4917	0
2,6-dimethylpyridine	Cc1cccc(C)n1	2.225	10.1808	63.2954	#N/A	14.9626	0	#N/A	15.6602	0	#N/A	18.9925	0	13.1789	19.3482	38.0609	#N/A	13.3134	0	#N/A	17.3315	0	7.53078	14.4124	47.3561	#N/A	16.3037	0	#N/A	15.7421	0	#N/A	15.1201	0	#N/A	17.3853	0	#N/A	14.6853	0	#N/A	14.8245	0	#N/A	14.6209	0	#N/A	13.9605	0
3,4-dimethylpyridine	Cc1cnccc1C	2.7784	3.20417	0.18128	#N/A	9.1751	0	#N/A	9.82563	0	#N/A	14.317	0	#N/A	15.0838	0	#N/A	6.96084	0	#N/A	12.7918	0	#N/A	8.28424	0	#N/A	11.122	0	#N/A	10.2747	0	#N/A	10.1581	0	#N/A	12.7261	0	#N/A	8.72978	0	#N/A	9.9115	0	#N/A	9.41232	0	#N/A	8.53788	0
3,5-dimethylpyridine	Cc1cncc(C)c1	3.78821	3.98853	0.0401271	#N/A	9.82864	0	#N/A	10.8205	0	#N/A	15.3527	0	#N/A	16.0446	0	#N/A	7.66065	0	#N/A	13.7435	0	#N/A	9.11938	0	#N/A	12.0153	0	#N/A	11.1517	0	#N/A	10.648	0	#N/A	13.6842	0	#N/A	9.61179	0	#N/A	10.5691	0	#N/A	10.0416	0	#N/A	9.13636	0
quinoline	c1ccc2ncccc2c1	7.17136	7.93699	0.586191	#N/A	14.0044	0	#N/A	13.8822	0	#N/A	17.5309	0	15.8603	17.8228	3.85164	#N/A	11.8064	0	#N/A	16.0508	0	#N/A	12.6255	0	#N/A	14.8845	0	#N/A	14.1497	0	#N/A	15.1083	0	#N/A	16.0596	0	#N/A	12.8439	0	#N/A	14.15	0	#N/A	13.8889	0	#N/A	13.1911	0
isoquinoline	c1ccc2cnccc2c1	9.55611	6.6797	8.27369	#N/A	13.1978	0	#N/A	12.6859	0	#N/A	16.7348	0	17.0013	17.2109	0.0439388	#N/A	10.8097	0	#N/A	15.026	0	#N/A	11.5519	0	#N/A	13.7279	0	#N/A	12.9822	0	#N/A	14.6001	0	#N/A	15.3045	0	#N/A	11.7936	0	#N/A	13.2049	0	#N/A	13.0338	0	#N/A	12.3732	0
propylbenzene	CCCc1ccccc1	21.9077	23.4681	2.43474	#N/A	27.5083	0	#N/A	27.1552	0	#N/A	28.4514	0	#N/A	27.5212	0	#N/A	26.3051	0	#N/A	26.7325	0	#N/A	26.8632	0	#N/A	27.1097	0	#N/A	26.9607	0	25.559	26.7076	1.31913	#N/A	27.2499	0	#N/A	26.6052	0	#N/A	25.6183	0	#N/A	25.9225	0	#N/A	25.5958	0
butylbenzene	CCCCc1ccccc1	25.3308	27.4036	4.29647	#N/A	31.3943	0	#N/A	31.0744	0	#N/A	32.3265	0	#N/A	31.4067	0	#N/A	30.2449	0	#N/A	30.1825	0	#N/A	30.7393	0	#N/A	30.7193	0	#N/A	30.6491	0	29.0391	30.45	1.99058	#N/A	31.0037	0	#N/A	30.5024	0	#N/A	29.0969	0	#N/A	29.5598	0	#N/A	29.3008	0
pentylbenzene	CCCCCc1ccccc1	28.868	31.4511	6.67226	#N/A	35.3318	0	#N/A	35.0888	0	#N/A	36.2637	0	#N/A	35.3669	0	#N/A	34.2574	0	#N/A	33.6809	0	#N/A	34.6867	0	#N/A	34.3853	0	#N/A	34.4002	0	#N/A	34.2429	0	#N/A	34.7995	0	#N/A	34.4812	0	#N/A	32.6393	0	#N/A	33.267	0	#N/A	33.0816	0
hexylbenzene	CCCCCCc1ccccc1	32.4622	37.2095	22.537	#N/A	40.9175	0	#N/A	41.012	0	#N/A	42.0573	0	#N/A	41.1949	0	#N/A	39.9503	0	#N/A	38.9463	0	#N/A	40.3384	0	#N/A	39.864	0	#N/A	39.9591	0	#N/A	39.644	0	#N/A	40.3282	0	#N/A	40.2134	0	#N/A	37.8908	0	#N/A	38.6677	0	#N/A	38.5349	0
isopropylbenzene	CC(C)c1ccccc1	22.0447	23.4596	2.00215	#N/A	27.5979	0	#N/A	27.1408	0	#N/A	28.4676	0	#N/A	27.5276	0	#N/A	26.3559	0	#N/A	26.744	0	#N/A	26.8958	0	#N/A	27.1266	0	#N/A	26.9735	0	25.9584	26.8288	0.757691	#N/A	27.2951	0	#N/A	26.6186	0	23.3911	25.6672	5.18094	#N/A	25.9782	0	#N/A	25.6535	0
tert-butylbenzene	CC(C)(C)c1ccccc1	23.3511	25.2309	3.53342	#N/A	29.4132	0	#N/A	28.9253	0	#N/A	30.2772	0	#N/A	29.3184	0	#N/A	28.2097	0	#N/A	28.4108	0	#N/A	28.6906	0	#N/A	28.8646	0	#N/A	28.7511	0	27.2135	28.5102	1.68135	#N/A	29.071	0	#N/A	28.4133	0	#N/A	27.2761	0	#N/A	27.6514	0	#N/A	27.3493	0
1,3-dichlorobenzene	[Cl]c1cccc([Cl])c1	21.052	19.4656	2.51643	#N/A	26.174	0	21.8507	22.5004	0.422133	#N/A	24.0654	0	22.0789	23.002	0.85212	#N/A	24.1796	0	#N/A	22.8562	0	#N/A	23.243	0	#N/A	23.3969	0	#N/A	23.2339	0	#N/A	27.0239	0	#N/A	23.5069	0	#N/A	22.6054	0	#N/A	23.8054	0	#N/A	24.4662	0	#N/A	24.3989	0
1,4-dichlorobenzene	[Cl]c1ccc([Cl])cc1	21.0805	19.3538	2.9813	#N/A	26.1874	0	22.0218	22.3811	0.12905	#N/A	23.9318	0	22.193	22.8719	0.460993	#N/A	24.1361	0	#N/A	22.7113	0	#N/A	23.1213	0	#N/A	23.2551	0	#N/A	23.0848	0	#N/A	27.2024	0	#N/A	23.3755	0	#N/A	22.4816	0	#N/A	23.828	0	#N/A	24.5157	0	#N/A	24.4686	0
fluoranthene	c1ccc2c(c1)c3cccc4cccc2c34	30.7336	29.7104	1.04684	32.2169	35.8281	13.0408	33.261	34.455	1.42578	#N/A	36.0885	0	34.9154	34.8974	0.000326928	30.8591	33.7462	8.33566	30.2943	33.8421	12.5874	34.3449	33.9169	0.183199	#N/A	34.3992	0	#N/A	34.0584	0	#N/A	36.1895	0	34.6872	34.8473	0.0256112	#N/A	33.5774	0	#N/A	33.6604	0	#N/A	34.0619	0	#N/A	33.713	0
coronene	c1cc2ccc3ccc4ccc5ccc6ccc1c7c2c3c4c5c67	37.3686	44.0112	44.1234	#N/A	49.7173	0	#N/A	49.0171	0	#N/A	50.2071	0	#N/A	49.1649	0	#N/A	47.7846	0	#N/A	46.5316	0	#N/A	47.8393	0	#N/A	47.6634	0	#N/A	47.5155	0	#N/A	49.9283	0	#N/A	48.3105	0	#N/A	47.6793	0	#N/A	46.6838	0	#N/A	47.5083	0	#N/A	47.3323	0
acenaphthene	C1Cc2cccc3cccc1c23	23.7277	22.1404	2.51934	26.0154	26.9384	0.851864	27.0994	27.055	0.00197268	#N/A	28.6222	0	27.9552	27.5515	0.162968	25.2167	25.3583	0.0200374	23.7904	27.3094	12.3831	#N/A	26.1373	0	25.6731	27.4414	3.12671	26.3007	27.0002	0.489363	28.0693	26.6232	2.091	27.727	27.3188	0.166627	#N/A	25.9607	0	#N/A	25.9979	0	#N/A	25.8986	0	#N/A	25.3085	0
fluorene	C1c2ccccc2c2ccccc12	25.5134	26.009	0.245664	#N/A	31.3073	0	#N/A	30.7392	0	#N/A	32.3276	0	#N/A	31.2046	0	#N/A	29.4912	0	26.643	30.406	14.1606	#N/A	30.0481	0	#N/A	30.7383	0	#N/A	30.3665	0	#N/A	31.2968	0	#N/A	31.0516	0	#N/A	29.7971	0	#N/A	29.6355	0	#N/A	29.8325	0	#N/A	29.3898	0
indane	C1Cc2ccccc2C1	20.0821	21.1306	1.09937	#N/A	24.9617	0	#N/A	24.9587	0	#N/A	26.2741	0	#N/A	25.4009	0	#N/A	23.7184	0	#N/A	24.6339	0	#N/A	24.5034	0	#N/A	24.8387	0	#N/A	24.6095	0	#N/A	24.3227	0	#N/A	25.0393	0	#N/A	24.3017	0	#N/A	23.4519	0	#N/A	23.6386	0	#N/A	23.259	0
fluoroethane	CCF	5.9961	2.5831	11.6485	#N/A	6.77895	0	#N/A	6.33542	0	#N/A	8.03575	0	#N/A	7.23914	0	#N/A	5.14193	0	#N/A	7.96423	0	#N/A	6.19871	0	#N/A	7.33963	0	#N/A	6.7623	0	9.18527	7.09346	4.37569	#N/A	7.36419	0	#N/A	5.90783	0	#N/A	6.84702	0	#N/A	6.46597	0	#N/A	5.86867	0
1-fluoropropane	CCCF	8.50636	6.12736	5.65962	#N/A	10.5177	0	#N/A	9.87409	0	#N/A	11.6726	0	#N/A	10.8222	0	#N/A	8.90666	0	#N/A	11.2826	0	#N/A	9.84318	0	#N/A	10.8053	0	#N/A	10.307	0	#N/A	10.5843	0	#N/A	10.9801	0	#N/A	9.52325	0	#N/A	10.0762	0	#N/A	9.84205	0	#N/A	9.29649	0
2-fluoropropane	CC(C)F	8.63758	5.85202	7.75933	#N/A	10.256	0	#N/A	9.65662	0	#N/A	11.4897	0	#N/A	10.6534	0	#N/A	8.64092	0	#N/A	11.1216	0	#N/A	9.58831	0	#N/A	10.6123	0	#N/A	10.1017	0	#N/A	10.3351	0	#N/A	10.7845	0	#N/A	9.28138	0	#N/A	9.8719	0	#N/A	9.61826	0	#N/A	9.06076	0
1-fluorobutane	CCCCF	11.7697	11.9305	0.0258449	#N/A	16.2881	0	#N/A	15.6365	0	#N/A	17.4201	0	#N/A	16.5647	0	#N/A	14.7789	0	#N/A	16.4366	0	#N/A	15.6026	0	#N/A	16.1967	0	#N/A	15.8268	0	#N/A	16.0421	0	#N/A	16.5799	0	#N/A	15.2983	0	#N/A	15.1816	0	#N/A	15.1832	0	#N/A	14.7342	0
1-fluoropentane	CCCCCF	15.1186	15.9893	0.758163	#N/A	20.2319	0	#N/A	19.6477	0	#N/A	21.3643	0	#N/A	20.5264	0	#N/A	18.8041	0	#N/A	19.9412	0	#N/A	19.5686	0	#N/A	19.8699	0	#N/A	19.5897	0	#N/A	19.8088	0	#N/A	20.3927	0	#N/A	19.2905	0	#N/A	18.7019	0	#N/A	18.8712	0	#N/A	18.496	0
fluorobenzene	Fc1ccccc1	12.5399	13.309	0.591603	#N/A	18.0436	0	11.8667	16.2391	19.1181	#N/A	17.5546	0	16.2596	16.6691	0.167678	#N/A	16.2174	0	#N/A	16.2336	0	#N/A	16.6499	0	#N/A	16.3311	0	#N/A	16.0341	0	17.2866	18.6404	1.83298	#N/A	16.8884	0	#N/A	16.1779	0	#N/A	16.4258	0	#N/A	16.7493	0	#N/A	16.5275	0
1,2-difluorobenzene	Fc1ccccc1F	13.5383	14.2478	0.503465	#N/A	19.6808	0	#N/A	17.318	0	#N/A	18.6947	0	#N/A	17.7691	0	#N/A	17.7621	0	#N/A	17.5106	0	#N/A	17.7108	0	#N/A	17.6865	0	#N/A	17.3927	0	#N/A	20.567	0	#N/A	18.0292	0	#N/A	17.2213	0	#N/A	18.0584	0	#N/A	18.4515	0	#N/A	18.2682	0
o-fluorochlorobenzene	Fc1ccccc1[Cl]	16.6761	14.8978	3.16243	#N/A	21.0063	0	#N/A	18.3344	0	#N/A	19.8584	0	#N/A	18.8484	0	#N/A	19.0064	0	#N/A	18.9631	0	#N/A	18.6421	0	#N/A	19.1701	0	#N/A	18.8338	0	#N/A	21.9821	0	#N/A	19.2046	0	#N/A	18.1338	0	#N/A	19.5352	0	#N/A	19.8625	0	#N/A	19.6255	0
m-fluorochlorobenzene	Fc1cccc([Cl])c1	16.4536	16.2228	0.053256	#N/A	22.2767	0	#N/A	19.2119	0	#N/A	20.6575	0	#N/A	19.6766	0	#N/A	20.3249	0	#N/A	19.5448	0	#N/A	19.8174	0	#N/A	19.9004	0	#N/A	19.6705	0	#N/A	23.1635	0	#N/A	20.0733	0	#N/A	19.2408	0	#N/A	20.3293	0	#N/A	20.8396	0	#N/A	20.7119	0
p-fluorochlorobenzene	Fc1ccc([Cl])cc1	16.6875	15.9325	0.570076	#N/A	22.1789	0	#N/A	18.9446	0	#N/A	20.4172	0	#N/A	19.4132	0	#N/A	20.1819	0	#N/A	19.3694	0	#N/A	19.5717	0	#N/A	19.7214	0	#N/A	19.4822	0	#N/A	23.1696	0	#N/A	19.8603	0	#N/A	18.9831	0	#N/A	20.251	0	#N/A	20.7683	0	#N/A	20.6467	0
3-fluorophenol	Oc1cccc(F)c1	-4.21039	-2.95212	1.58325	#N/A	16.9525	0	#N/A	1.62551	0	#N/A	4.98269	0	#N/A	3.04669	0	#N/A	14.4709	0	#N/A	14.1467	0	#N/A	3.78615	0	#N/A	14.4925	0	#N/A	14.108	0	#N/A	22.1926	0	#N/A	6.39054	0	#N/A	2.24775	0	#N/A	18.0572	0	#N/A	18.5183	0	#N/A	18.5792	0
4-fluorophenol	Oc1ccc(F)cc1	-3.97078	-3.76971	0.0404257	#N/A	16.2077	0	-1.48334	1.09133	6.62889	#N/A	4.53994	0	#N/A	2.61546	0	#N/A	13.6434	0	#N/A	13.7124	0	#N/A	3.07554	0	#N/A	13.9729	0	#N/A	13.5164	0	#N/A	21.5249	0	4.05065	5.8946	3.40016	#N/A	1.57912	0	#N/A	17.5647	0	#N/A	17.9151	0	#N/A	17.9056	0
cis-but-2-ene	CC=CC	15.5579	12.2806	10.7409	#N/A	15.6486	0	#N/A	15.2877	0	#N/A	16.4657	0	#N/A	15.6931	0	#N/A	14.5306	0	#N/A	15.6187	0	#N/A	15.3543	0	#N/A	15.6231	0	#N/A	15.3882	0	#N/A	15.0631	0	#N/A	15.5972	0	#N/A	15.0377	0	#N/A	14.5887	0	#N/A	14.63	0	#N/A	14.2536	0
trans-but-2-ene	CC=CC	15.0844	12.2806	7.86128	#N/A	15.6486	0	#N/A	15.2877	0	#N/A	16.4657	0	#N/A	15.6931	0	#N/A	14.5306	0	#N/A	15.6187	0	#N/A	15.3543	0	#N/A	15.6231	0	#N/A	15.3882	0	#N/A	15.0631	0	#N/A	15.5972	0	#N/A	15.0377	0	15.9173	14.5887	1.76533	#N/A	14.63	0	#N/A	14.2536	0
2-methylbut-2-ene	CC=C(C)C	18.1937	16.5093	2.83728	#N/A	19.778	0	19.0552	19.4295	0.140126	#N/A	20.5125	0	#N/A	19.7475	0	#N/A	18.7698	0	#N/A	19.2789	0	#N/A	19.4754	0	#N/A	19.4845	0	#N/A	19.3552	0	#N/A	18.9733	0	#N/A	19.5207	0	#N/A	19.1754	0	#N/A	18.2686	0	#N/A	18.4847	0	18.3934	18.1866	0.0427659
2,2-dimethylpropane	CC(C)(C)C	20.8808	18.5745	5.3191	#N/A	21.3425	0	#N/A	20.7893	0	#N/A	21.6088	0	#N/A	20.9317	0	#N/A	20.5901	0	#N/A	20.0795	0	#N/A	21.1117	0	#N/A	20.5004	0	#N/A	20.5656	0	#N/A	20.251	0	#N/A	20.6032	0	#N/A	20.7865	0	#N/A	19.2354	0	#N/A	19.7211	0	#N/A	19.592	0
[truncated: 54 more columns]

## Sheet: 4 Octanol_water comparison
										Abraham					cLogP			SSIP model
Gas Const R (J K-1 mol-1)=	8.31446	c	e	s	a	b	v	Solvent
T=	298	0.088	0.562	-1.054	0.034	-3.46	3.814	1-octanol
RT=	2.47771		R2	PiH2	AlphaH2	BetaH2			Count All		rmsd			Count All		rmsd		Count All		rmsd
									189		1.05546			189		0.820614		189		1.57277
﻿Compound	Class		E	S	A	B	V	Abraham calc logP	Expt -deltaG	calc -deltaG	diff^2		clogP	Expt -deltaG	calc from clogP -deltaG	diff^2		Expt -deltaG	Calc. from SSIP model	diff^2
n-pentane	Alkane-Acyclic Linear		0	0	0	0	0.8131	3.18916	19.3404	18.1946	1.31286		3.41223	19.3404	19.4672	0.0160786		19.3404	19.9898	0.42171
n-hexane	Alkane-Acyclic Linear		0	0	0	0	0.954	3.72656	22.25	21.2605	0.979155		3.94358	22.25	22.4986	0.0618048		22.25	23.2913	1.08425
n-heptane	Alkane-Acyclic Linear		0	0	0	0	1.0949	4.26395	25.6731	24.3264	1.81362		4.47493	25.6731	25.5301	0.0204635		25.6731	26.5928	0.845838
n-octane	Alkane-Acyclic Linear		0	0	0	0	1.2358	4.80134	29.3815	27.3923	3.95671		5.00628	29.3815	28.5615	0.672343		29.3815	29.8943	0.263022
n-nonane	Alkane-Acyclic Linear		0	0	0	0	1.3767	5.33873	32.234	30.4582	3.15353		5.53763	32.234	31.5929	0.411023		32.234	33.1958	0.92504
n-decane	Alkane-Acyclic Linear		0	0	0	0	1.5176	5.87613	33.5462	33.5241	0.000488413		6.06898	33.5462	34.6243	1.16237		33.5462	36.4973	8.70905
isopentane	Alkane Acyclic Branched		0	0	0	0	0.8131	3.18916	18.1994	18.1946	2.27839e-05		3.22827	18.1994	18.4177	0.0476675		18.1994	19.9898	3.2056
2-methylpentane	Alkane Acyclic Branched		0	0	0	0	0.954	3.72656	21.2802	21.2605	0.000386068		3.75962	21.2802	21.4491	0.0285539		21.2802	23.2913	4.04472
3-methylpentane	Alkane Acyclic Branched		0	0	0	0	0.954	3.72656	20.5385	21.2605	0.521313		3.75962	20.5385	21.4491	0.829279		20.5385	23.2913	7.578
3-methylhexane	Alkane Acyclic Branched		0	0	0	0	1.0949	4.26395	24.3039	24.3264	0.000507421		4.29097	24.3039	24.4806	0.031216		24.3039	26.5928	5.23918
2,2-dimethylpentane	Alkane Acyclic Branched		0	0	0	0	1.0949	4.26395	24.3039	24.3264	0.000507421		4.10912	24.3039	23.4431	0.740927		24.3039	26.5928	5.23918
3-methylheptane	Alkane Acyclic Branched		0	0	0	0	1.2358	4.80134	27.3847	27.3923	5.85323e-05		4.82232	27.3847	27.512	0.0162128		27.3847	29.8943	6.29836
2,5-dimethylhexane	Alkane Acyclic Branched		0	0	0	0	1.2358	4.80134	27.3847	27.3923	5.85323e-05		4.63836	27.3847	26.4625	0.850395		27.3847	29.8943	6.29836
2,2,4-trimethylpentane	Alkane iso-octane		0	0	0	0	1.2358	4.80134	27.3847	27.3923	5.85323e-05		4.45652	27.3847	25.425	3.84011		27.3847	29.8943	6.29836
2,3,4-trimethylpentane	Alkane iso-octane		0	0	0	0	1.2358	4.80134	27.3847	27.3923	5.85323e-05		4.4544	27.3847	25.413	3.88748		27.3847	29.8943	6.29836
2,2,5-trimethylhexane	Alkane Acyclic Branched		0	0	0	0	1.3767	5.33873	30.4654	30.4582	5.21965e-05		4.98787	30.4654	28.4565	4.03596		30.4654	33.1958	7.45499
3,3-diethylpentane	Alkane Acyclic Branched		0	0.15	0	0	1.3767	5.18063	29.6097	29.5562	0.00285538		5.17182	29.6097	29.506	0.0107531		29.6097	33.1958	12.8605
cyclopentane	Alkane-Cyclic		0.263	0.1	0	0	0.7045	2.81737	17.1154	16.0735	1.08563		2.8214	17.1154	16.0965	1.03818		17.1154	16.6883	0.18242
cyclohexane	Alkane-Cyclic		0.305	0.1	0	0	0.8454	3.37837	19.6257	19.274	0.123646		3.38569	19.6257	19.3158	0.0960191		19.6257	19.9898	0.132595
cyclooctane	Alkane-Cyclic		0.409	0.1	0	0	1.1272	4.5116	25.3879	25.7393	0.123504		4.51425	25.3879	25.7544	0.134355		25.3879	26.5928	1.45191
methylcyclopentane	Alkane-Cyclic Branched		0.225	0.1	0	0	0.8454	3.33341	19.2263	19.0175	0.0435873		3.31348	19.2263	18.9039	0.103973		19.2263	19.9898	0.582926
methylcyclohexane	Alkane-Cyclic Branched		0.244	0.06	0	0	0.9863	3.92364	22.1359	22.3849	0.061976		3.87776	22.1359	22.1232	0.000163064		22.1359	23.2913	1.3349
ethylcyclohexane	Alkane-Cyclic Branched		0.263	0.1	0	0	1.1272	4.42955	26.0154	25.2712	0.553913		4.40911	26.0154	25.1546	0.74104		26.0154	26.5928	0.333375
cis-1,2-dimethylcyclohexane	Alkane-Cyclic Branched		0.281	0.24	0	0	1.1272	4.2921	25.3308	24.487	0.711955		4.36984	25.3308	24.9305	0.160229		25.3308	26.5928	1.59265
trans-1,4-dimethylcyclohexane	Alkane-Cyclic Branched		0.191	0.17	0	0	1.1272	4.3153	25.1597	24.6194	0.291881		4.36984	25.1597	24.9305	0.0525007		25.1597	26.5928	2.05394
tetrachloromethane	Chlorosolvent-CCl4		0.458	0.38	0	0	0.7391	2.7638	16.1455	15.7679	0.142627		2.8607	16.1455	16.3207	0.030669		16.1455	17.946	3.24159
benzene	Benzene		0.61	0.52	0	0.14	0.7164	2.13069	11.8667	12.1559	0.0836313		2.21828	11.8667	12.6556	0.622408		11.8667	11.7171	0.0223884
water	Water		0	0.6	0.59	0.46	0.1673	-1.47786	-7.87309	-8.43138	0.31169		-1.38	-7.87309	-7.87309	0		-7.87309	-6.19687	2.8097
methanol	Alcohol-Methanol		0.278	0.44	0.43	0.47	0.3082	-0.655629	-4.30738	-3.74045	0.321403		-0.71884	-4.30738	-4.10108	0.0425588		-4.30738	-5.25037	0.889229
ethanol	Alcohol-Primary		0.246	0.42	0.37	0.48	0.4491	-0.151781	-1.74007	-0.865929	0.764117		-0.18749	-1.74007	-1.06966	0.44945		-1.74007	-1.94887	0.0435971
propan-1-ol	Alcohol-Primary		0.236	0.42	0.37	0.48	0.59	0.379992	1.42628	2.16791	0.550004		0.34386	1.42628	1.96177	0.286743		1.42628	1.35264	0.00542406
butan-1-ol	Alcohol-Primary		0.224	0.42	0.37	0.48	0.7309	0.910641	4.79232	5.19533	0.162421		0.87521	4.79232	4.99319	0.040352		4.79232	4.65414	0.0190929
pentan-1-ol	Alcohol-Primary		0.219	0.42	0.37	0.48	0.8718	1.44522	8.61476	8.2452	0.136575		1.40656	8.61476	8.02462	0.348264		8.61476	7.95564	0.434435
hexan-1-ol	Alcohol-Primary		0.21	0.42	0.37	0.48	1.0127	1.97756	11.5814	11.2822	0.0895146		1.93791	11.5814	11.056	0.27603		11.5814	11.2571	0.105162
heptan-1-ol	Alcohol-Primary		0.211	0.42	0.37	0.48	1.1536	2.51551	14.9475	14.3513	0.355354		2.46926	14.9475	14.0875	0.739586		14.9475	14.5586	0.151177
octan-1-ol	Alcohol-Primary		0.199	0.42	0.37	0.48	1.2945	3.04616	17.5148	17.3788	0.0184972		3.00061	17.5148	17.1189	0.156721		17.5148	17.8601	0.119284
nonan-1-ol	Alcohol-Primary		0.193	0.42	0.37	0.48	1.4354	3.58018	21.5084	20.4254	1.17276		3.53196	21.5084	20.1503	1.84431		21.5084	21.1616	0.120214
decan-1-ol	Alcohol-Primary		0.191	0.42	0.37	0.48	1.5763	4.11645	23.5052	23.4849	0.000410121		4.06331	23.5052	23.1817	0.104604		23.5052	24.4632	0.917736
dimethylether	Ether-Dimethyl		0	0.27	0	0.41	0.4491	0.0976874	0.570514	0.55732	0.000174074		-0.0814309	0.570514	-0.464575	1.07141		0.570514	-0.673065	1.54649
diethyl ether	Ether-Dialkyl		0.041	0.25	0	0.45	0.7309	1.07819	5.07757	6.15125	1.15278		0.981269	5.07757	5.59827	0.271131		5.07757	5.92994	0.726529
dipropylether	Ether-Dialkyl		0.008	0.25	0	0.45	1.0127	2.13443	11.5814	12.1772	0.354989		2.04397	11.5814	11.6611	0.00635124		11.5814	12.5329	0.905379
dibutylether	Ether-Dialkyl		0	0.25	0	0.45	1.2945	3.20472	18.3135	18.2834	0.000906385		3.10667	18.3135	17.724	0.347532		18.3135	19.1359	0.676434
chlorobenzene	Benzene-Chloro		0.718	0.65	0	0.07	0.8388	2.7634	16.4878	15.7656	0.521682		2.81335	16.4878	16.0506	0.191221		16.4878	17.0089	0.27152
1,2-dichlorobenzene	Benzene-Dichloro		0.872	0.78	0	0.04	0.9612	3.28356	19.5686	18.7332	0.697987		3.28326	19.5686	18.7314	0.700868		19.5686	20.8774	1.71284
1,2-dichloroethane	Chlorosolvent-CH2ClCH2Cl		0.416	0.64	0.1	0.11	0.6352	1.69268	8.4436	9.657	1.47233		1.41355	8.4436	8.06447	0.143743		8.4436	6.59514	3.41681
methane	Alkane-Methane		0	0	0	0	0.2495	1.03959	6.2186	5.93102	0.0827017		1.09	6.2186	6.2186	0		6.2186	6.7838	0.319451
ethane	Alkane-Acyclic Linear		0	0	0	0	0.3904	1.57699	10.3263	8.99692	1.76725		1.81818	10.3263	10.3729	0.00217582		10.3263	10.0853	0.0580792
propane	Alkane-Acyclic Linear		0	0	0	0	0.5313	2.11438	13.4641	12.0628	1.96366		2.34953	13.4641	13.4044	0.00357075		13.4641	13.3868	0.00597836
butane	Alkane-Acyclic Linear		0	0	0	0	0.6722	2.65177	16.4878	15.1287	1.84724		2.88088	16.4878	16.4358	0.00270961		16.4878	16.6883	0.0401836
trimethylamine	Amine-Tertiary		0.14	0.2	0	0.67	0.6311	0.0446954	1.08398	0.254993	0.687212		0.0627631	1.08398	0.358072	0.526937		1.08398	1.41857	0.111955
triethylamine	Amine-Tertiary		0.101	0.15	0	0.79	1.0538	1.27246	8.27245	7.25953	1.026		1.65681	8.27245	9.45235	1.39215		8.27245	11.3231	9.30635
piperidine	Amine-Secondary Cyclic		0.422	0.4	0.06	0.77	0.8043	0.309004	4.79232	1.76291	9.17729		0.932139	4.79232	5.31798	0.276324		4.79232	5.27588	0.233832
diethylamine	Amine-Secondary		0.154	0.3	0.08	0.69	0.772	0.418076	3.30898	2.38518	0.853404		0.632299	3.30898	3.60735	0.0890261		3.30898	5.27588	3.86869
dipropylamine	Amine-Secondary		0.124	0.3	0.08	0.69	1.0538	1.476	9.52758	8.42079	1.22498		1.695	9.52758	9.6702	0.020341		9.52758	11.8789	5.52862
dibutylamine	Amine-Secondary		0.107	0.3	0.08	0.69	1.3356	2.54123	16.1455	14.4981	2.71412		2.7577	16.1455	15.7331	0.170146		16.1455	18.4819	5.45852
methylamine	Amine-Primary		0.25	0.35	0.16	0.58	0.3493	-0.80953	-3.25193	-4.61848	1.86746		-0.664386	-3.25193	-3.79041	0.289966		-3.25193	-2.62169	0.397196
ethylamine	Amine-Primary		0.236	0.35	0.16	0.61	0.4902	-0.383805	-0.741668	-2.18966	2.09669		-0.133036	-0.741668	-0.758989	0.000300017		-0.741668	0.679808	2.02059
n-propylamine	Amine-Primary		0.225	0.35	0.16	0.61	0.6311	0.147405	2.73847	0.840968	3.6005		0.398314	2.73847	2.27244	0.217184		2.73847	3.98131	1.54466
n-butylamine	Amine-Primary		0.224	0.35	0.16	0.61	0.772	0.684236	5.53398	3.90366	2.65795		0.929664	5.53398	5.30386	0.0529565		5.53398	7.28281	3.0584
pentylamine	Amine-Primary		0.211	0.35	0.16	0.61	0.9129	1.21432	8.50065	6.92788	2.47363		1.46101	8.50065	8.33529	0.0273471		8.50065	10.5843	4.34164
hexylamine	Amine-Primary		0.197	0.35	0.16	0.61	1.0538	1.74385	11.7526	9.94889	3.25332		1.99236	11.7526	11.3667	0.148898		11.7526	13.8858	4.55069
heptylamine	Amine-Primary		0.197	0.35	0.16	0.61	1.1947	2.28124	14.6622	13.0148	2.71398		2.52371	14.6622	14.3981	0.0697322		14.6622	17.1873	6.37621
n-octylamine	Amine-Primary		0.187	0.35	0.16	0.61	1.3356	2.81301	17.6289	16.0486	2.4972		3.05506	17.6289	17.4296	0.0397268		17.6289	20.4888	8.1793
cyclohexylamine	Amine-Primary		0.326	0.56	0.19	0.58	0.9452	1.28562	8.50065	7.33467	1.35953		1.3952	8.50065	7.95981	0.292516		8.50065	10.5843	4.34164
ethyl benzene	Benzene-Alkyl Substituted		0.613	0.51	0	0.15	0.9982	3.1831	17.9712	18.16	0.0356621		3.20971	17.9712	18.3118	0.116049		17.9712	18.4049	0.188084
toluene	Benzene-Methyl substituted		0.601	0.52	0	0.14	0.8573	2.66302	15.575	15.1929	0.146005		2.67836	15.575	15.2804	0.0867938		15.575	15.1034	0.222461
o-xylene	Benzene-Methyl substituted		0.663	0.56	0	0.16	0.9982	3.1239	17.8	17.8223	0.000495296		3.13844	17.8	17.9052	0.0110656		17.8	18.4954	0.483552
m-xylene	Benzene-Methyl substituted		0.623	0.52	0	0.16	0.9982	3.14358	18.2564	17.9346	0.103606		3.13844	18.2564	17.9052	0.123354		18.2564	18.4954	0.0571052
p-xylene	Benzene-Methyl substituted		0.613	0.52	0	0.16	0.9982	3.13796	17.9712	17.9025	0.00471771		3.13844	17.9712	17.9052	0.00435096		17.9712	18.4954	0.274811
mesitylene	Benzene-Methyl substituted		0.649	0.52	0	0.19	1.1391	3.59179	19.5116	20.4916	0.960515		3.59851	19.5116	20.53	1.03724		19.5116	21.3609	3.41987
1,2,4,5-tetramethylbenzene	Benzene-Methyl substituted		0.739	0.6	0	0.19	1.28	4.09544	23.3911	23.365	0.000677368		4.05859	23.3911	23.1548	0.05581		23.3911	23.8147	0.179435
propanone	Ketone-Dialkyl		0.179	0.7	0.04	0.49	0.547	-0.156984	-1.36923	-0.895615	0.224314		-0.157315	-1.36923	-0.897504	0.222528		-1.36923	-0.979595	0.151818
butanone	Ketone-Dialkyl		0.166	0.7	0	0.51	0.6879	0.302543	1.65449	1.72605	0.00512044		0.374035	1.65449	2.13392	0.229854		1.65449	2.32191	0.445446
pentan-2-one	Ketone-Dialkyl		0.143	0.68	0	0.51	0.8288	0.848089	4.79232	4.83847	0.00212984		0.905385	4.79232	5.16535	0.139152		4.79232	5.62341	0.690718
pentan-3-one	Ketone-Dialkyl		0.154	0.66	0	0.51	0.8288	0.875351	4.67821	4.994	0.0997209		0.905385	4.67821	5.16535	0.237299		4.67821	5.62341	0.893397
hexan-2-one	Ketone-Dialkyl		0.136	0.68	0	0.51	0.9697	1.38155	7.87309	7.88192	7.79767e-05		1.43673	7.87309	8.19677	0.104769		7.87309	8.92491	1.10633
heptan-4-one	Ketone-Dialkyl		0.113	0.64	0	0.51	1.1106	1.94817	11.6385	11.1146	0.274448		1.96808	11.6385	11.2282	0.168334		11.6385	12.2264	0.345666
4-methylpentan-2-one	Ketone-Dialkyl		0.111	0.65	0	0.51	0.9697	1.39912	7.47373	7.98216	0.258501		1.25278	7.47373	7.14727	0.106575		7.47373	8.92491	2.10593
cyclopentanone	Ketone-Cycloalkyl		0.373	0.86	0	0.52	0.7202	0.338829	2.16795	1.93306	0.0551721		0.197874	2.16795	1.1289	1.07963		2.16795	2.32191	0.0237023
cyclohexanone	Ketone-Cycloalkyl		0.403	0.86	0	0.56	0.8611	0.754681	4.62116	4.30556	0.0996035		0.762155	4.62116	4.3482	0.074509		4.62116	5.62341	1.0045
phenol	Phenol		0.805	0.89	0.6	0.3	0.7751	1.54098	8.55771	8.79151	0.0546646		1.48196	8.55771	8.45479	0.0105926		8.55771	7.91102	0.4182
3-methylphenol	Phenol-methyl substituted		0.822	0.88	0.57	0.34	0.916	1.95905	11.2962	11.1766	0.0142884		1.94204	11.2962	11.0796	0.0469088		11.2962	11.3009	2.24166e-05
4-methylphenol	Phenol-methyl substituted		0.82	0.87	0.57	0.31	0.916	2.07226	11.2391	11.8226	0.340391		1.94204	11.2391	11.0796	0.0254508		11.2391	11.3009	0.0038175
3,4-dimethylphenol	Phenol-methyl substituted		0.83	0.9	0.55	0.38	1.0569	2.34078	12.7225	13.3545	0.399419		2.40211	12.7225	13.7044	0.964196		12.7225	14.703	3.92263
3,5-dimethylphenol	Phenol-methyl substituted		0.83	0.86	0.55	0.37	1.0569	2.41754	13.4071	13.7924	0.148461		2.40211	13.4071	13.7044	0.0883986		13.4071	14.703	1.67948
3-chlorophenol	Phenol-Chloro substituted		0.909	1.06	0.69	0.15	0.8975	2.40914	14.2628	13.7445	0.268688		2.39901	14.2628	13.6867	0.331982		14.2628	12.9333	1.7676
4-chlorophenol	Phenol-Chloro substituted		0.915	1.08	0.67	0.2	0.8975	2.21775	13.6923	12.6526	1.08105		2.42578	13.6923	13.8394	0.0216284		13.6923	12.9333	0.576078
3,4-dichlorophenol	Phenol-Chloro substituted		1.02	1.24	0.93	0	1.0199	3.2758	18.9981	18.6889	0.0956207		3.21766	18.9981	18.3572	0.410742		18.9981	16.8146	4.76768
3,5-dichlorophenol	Phenol-Chloro substituted		1.02	1.02	0.92	0	1.0199	3.50734	20.6526	20.0098	0.413125		3.32846	20.6526	18.9893	2.76656		20.6526	16.8146	14.7302
chloroethane	Alkane-Monochloro		0.227	0.4	0	0.1	0.5128	1.40379	8.15835	8.00883	0.0223542		1.50053	8.15835	8.56072	0.161903		8.15835	8.34022	0.0330787
1-chloropropane	Alkane-Monochloro		0.216	0.4	0	0.1	0.6537	1.935	11.6385	11.0395	0.358822		2.03188	11.6385	11.5921	0.00214711		11.6385	11.6417	1.05222e-05
1-chlorobutane	Alkane-Monochloro		0.21	0.4	0	0.1	0.7946	2.46902	15.0616	14.0861	0.951483		2.56323	15.0616	14.6236	0.191841		15.0616	14.9432	0.0140037
1,3-dichloropropane	Alkane-Dichloro		0.408	0.8	0.05	0.12	0.7761	2.02064	11.4103	11.528	0.0138679		2.00023	11.4103	11.4116	1.72293e-06		11.4103	9.89664	2.29108
1-chloropentane	Alkane-Monochloro		0.208	0.38	0	0.09	0.9355	3.06097	17.743	17.4633	0.078235		3.09458	17.743	17.655	0.0077414		17.743	18.2447	0.251754
1-chloroheptane	Alkane-Monochloro		0.194	0.4	0	0.09	1.2173	4.10681	23.6763	23.4299	0.0607149		4.15728	23.6763	23.7178	0.00172386		23.6763	24.8477	1.37221
naphthalene	Polycyclic aromatic		1.34	0.92	0	0.2	1.0854	3.31912	18.9696	18.936	0.00112702		3.44898	18.9696	19.6769	0.500322		18.9696	18.8185	0.0228111
phenanthrene	Polycyclic aromatic		2.055	1.29	0	0.29	1.4544	4.42693	25.6161	25.2563	0.129466		4.67968	25.6161	26.6982	1.17105		25.6161	25.0956	0.270933
﻿anthracene	Polycyclic aromatic		2.29	1.34	0	0.28	1.4544	4.5409	25.3879	25.9065	0.268953		4.67968	25.3879	26.6982	1.71703		25.3879	25.0956	0.0854425
pyrene	Polycyclic aromatic		2.808	1.71	0	0.28	1.5846	4.93862	28.5257	28.1755	0.122625		5.17095	28.5257	29.501	0.951196		28.5257	26.1765	5.51889
pyridine	Pyridine		0.631	0.84	0	0.52	0.6753	0.333656	3.70834	1.90355	3.25725		0.726091	3.70834	4.14245	0.188452		3.70834	5.31743	2.58916
acetonitrile	Nitrile		0.237	0.9	0.07	0.32	0.4042	-0.290607	-1.93975	-1.65795	0.0794071		-0.447196	-1.93975	-2.55131	0.374016		-1.93975	-3.1982	1.58369
propionitrile	Nitrile		0.162	0.9	0.02	0.36	0.545	0.064154	0.912822	0.366007	0.299006		0.084154	0.912822	0.48011	0.18724		0.912822	0.103307	0.655315
1-cyanopropane	Nitrile		0.188	0.9	0	0.36	0.686	0.61586	3.42308	3.51357	0.00818724		0.615504	3.42308	3.51153	0.00782378		3.42308	3.40481	0.000333936
1-cyanobutane	Nitrile		0.177	0.9	0	0.36	0.8269	1.14707	5.36283	6.5442	1.39563		1.14685	5.36283	6.54296	1.39271		5.36283	6.70631	1.80494
biphenyl	Benzene-Biphenyl		1.36	0.99	0	0.26	1.3242	3.95976	22.8776	22.591	0.0821592		3.97569	22.8776	22.6818	0.0383268		22.8776	22.3657	0.262056
ammonia	Amine-NH3		0.139	0.39	0.16	0.56	0.2084	-1.38226	-7.98719	-7.88601	0.0102382		#N/A	-7.98719	#N/A	0		-7.98719	-7.37263	0.37769
t-butyl chloride	Alkane-Monochloro		0.142	0.3	0	0.03	0.7946	2.77841	14.7478	15.8512	1.21754		2.19743	14.7478	12.5366	4.88925		14.7478	15.4723	0.524876
tetrahydropyran	Ether cyclic		0.296	0.5	0	0.47	0.7632	1.012	4.53558	5.77358	1.53264		0.891134	4.53558	5.08404	0.300806		4.53558	5.92994	1.94422
tetrahydrofuran	Ether cyclic		0.289	0.52	0	0.48	0.6223	0.41499	2.62436	2.36758	0.0659396		0.326853	2.62436	1.86474	0.577026		2.62436	2.62844	1.65933e-05
tetrahydrothiophene	Sulfide-cycloalkyl		0.623	0.66	0	0.26	0.7271	1.61605	9.18527	9.21976	0.00118955		1.33625	9.18527	7.62349	2.43916		9.18527	6.06659	9.72619
4-ethylphenol	Phenol-alkyl substituted		0.8	0.9	0.55	0.36	1.0569	2.39312	14.7193	13.6531	1.13677		2.47339	14.7193	14.111	0.369958		14.7193	14.6024	0.0136528
d-valerolactam	Amide		0.574	1.5	0.3	0.7	0.82	-0.454732	-2.65289	-2.59431	0.00343166		-0.888564	-2.65289	-5.06938	5.83943		-2.65289	-0.0286857	6.88644
N-methyl-delta-valerolactam	Amide		0.525	0.93	0	0.84	0.9609	0.161303	-1.31218	0.920253	4.98377		0.166212	-1.31218	0.948261	5.1096		-1.31218	1.01902	5.4345
n,n-dimethylacetamide	Amide		0.363	1.38	0	0.8	0.7877	-0.926226	-4.39296	-5.28425	0.794402		-0.746348	-4.39296	-4.25802	0.018208		-4.39296	-2.28248	4.4541
n-methylpiperidine	Amine-Tertiary Cyclic		0.318	0.34	0	0.72	0.9452	1.02215	7.35963	5.8315	2.33517		1.32432	7.35963	7.55545	0.0383467		7.35963	8.02158	0.438178
n-methyl-2-pyrrolidinone	Amide		0.491	1.3	0	0.79	0.82	-0.612178	-4.76379	-3.49256	1.61603		-0.398069	-4.76379	-2.27104	6.21381		-4.76379	-2.28248	6.15688
dimethylsulfide	Sulfide-Dialkyl		0.404	0.43	0	0.27	0.5539	1.0402	10.0981	5.9345	17.3355		0.887302	10.0981	5.06218	25.3604		10.0981	2.76508	53.773
diethylsulfide	Sulfide-Dialkyl		0.373	0.38	0	0.33	0.8357	1.94267	11.125	11.0832	0.00175083		1.95	11.125	11.125	1.18372e-10		11.125	9.36809	3.0868
dipropylsulfide	Sulfide-Dialkyl		0.358	0.38	0	0.34	1.1175	2.97442	16.8872	16.9695	0.00676896		3.0127	16.8872	17.1879	0.0904028		16.8872	15.9711	0.839264
diisopropylsulfide	Sulfide-Dialkyl		0.328	0.26	0	0.41	1.1175	2.84184	14.3769	16.2131	3.37144		2.64479	14.3769	15.0889	0.506847		14.3769	15.9711	2.5413
methylethylsulfide	Sulfide-Dialkyl		0.39	0.36	0	0.3	0.6948	1.53971	8.78591	8.78424	2.79045e-06		1.41865	8.78591	8.0936	0.479289		8.78591	6.06659	7.39473
ethene	Alkene-ethene		0.107	0.1	0	0.07	0.3474	1.12552	6.44681	6.42123	0.000653962		1.31643	6.44681	7.51039	1.13122		6.44681	6.41738	0.000865705
propene	Alkene-methyl substituted		0.103	0.08	0	0.07	0.4883	1.68174	10.0981	9.59457	0.253535		1.83951	10.0981	10.4947	0.157272		10.0981	9.71888	0.143799
but-1-ene	Alkene-monoalkyl substituted		0.1	0.08	0	0.07	0.6292	2.21745	13.6923	12.6509	1.08468		2.37086	13.6923	13.5261	0.0276346		13.6923	13.0204	0.451508
pent-1-ene	Alkene-monoalkyl substituted		0.093	0.08	0	0.07	0.7701	2.75091	15.9744	15.6943	0.0784447		2.90221	15.9744	16.5575	0.340044		15.9744	16.3219	0.120759
hex-1-ene	Alkene-monoalkyl substituted		0.078	0.08	0	0.07	0.911	3.27987	19.3689	18.7121	0.431429		3.43356	19.3689	19.5889	0.0484006		19.3689	19.6234	0.0647443
hept-1-ene	Alkene-monoalkyl substituted		0.092	0.08	0	0.07	1.0519	3.82513	22.7635	21.8229	0.884733		3.96491	22.7635	22.6204	0.0204864		22.7635	22.9249	0.0260482
oct-1-ene	Alkene-monoalkyl substituted		0.094	0.08	0	0.07	1.1928	4.36365	26.0725	24.8952	1.38597		4.49626	26.0725	25.6518	0.176977		26.0725	26.2264	0.0236902
non-1-ene	Alkene-monoalkyl substituted		0.09	0.08	0	0.07	1.3337	4.89879	29.3815	27.9483	2.054		5.02761	29.3815	28.6832	0.487539		29.3815	29.5279	0.0214444
dec-1-ene	Alkene-monoalkyl substituted		0.093	0.08	0	0.07	1.4746	5.43787	32.5193	31.0238	2.23648		5.55896	32.5193	31.7146	0.647449		32.5193	32.8294	0.096172
n-methylformamide	Amide		0.405	1.36	0.4	0.55	0.5059	-1.07773	-5.53398	-6.14858	0.377733		-0.597912	-5.53398	-3.41117	4.50634		-5.53398	-6.63169	1.20496
n,n-dimethylformamide	Amide		0.367	1.31	0	0.74	0.6468	-1.17999	-5.76219	-6.73201	0.940553		-1.01	-5.76219	-5.76218	2.98995e-11		-5.76219	-5.58398	0.0317567
n-methylacetamide	Amide		0.35	1.28	0.4	0.71	0.6468	-1.04052	-5.99039	-5.93634	0.00292216		-1.05	-5.99039	-5.99039	2.96028e-11		-5.99039	-3.33019	7.0767
n-butylacetamide	Amide		0.32	1.29	0.4	0.72	1.0695	0.509653	2.90962	2.90764	3.91893e-06		0.544051	2.90962	3.10388	0.0377389		2.90962	6.57432	13.43
undecan-1-ol	Alcohol-Primary		0.181	0.42	0.37	0.48	1.7172	4.64822	26.9282	26.5187	0.167688		4.59466	26.9282	26.2132	0.511342		26.9282	27.7647	0.699574
dodecan-1-ol	Alcohol-Primary		0.175	0.42	0.37	0.48	1.8581	5.18224	29.2674	29.5654	0.088837		5.12601	29.2674	29.2446	0.000518207		29.2674	31.0662	3.23568
tridecan-1-ol	Alcohol-Primary		0.169	0.42	0.37	0.48	1.999	5.71626	33.2039	32.6121	0.350261		5.65736	33.2039	32.276	0.860968		33.2039	34.3677	1.35433
tetradecan-1-ol	Alcohol-Primary		0.163	0.42	0.37	0.48	2.1399	6.25028	36.2847	35.6587	0.391803		6.18871	36.2847	35.3074	0.954983		36.2847	37.6692	1.9168
pentadecan-1-ol	Alcohol-Primary		0.157	0.42	0.37	0.48	2.2808	6.78431	38.7379	38.7054	0.00105556		6.72006	38.7379	38.3389	0.159213		38.7379	40.9707	4.9853
hexadecan-1-ol	Alcohol-Primary		0.151	0.42	0.37	0.48	2.4217	7.31833	41.7616	41.7521	9.12506e-05		7.25141	41.7616	41.3703	0.153126		41.7616	44.2722	6.3029
adamantan-1-ol	Alcohol-Tertiary		0.94	0.9	0.31	0.66	1.2505	2.16403	12.209	12.3461	0.0187902		2.16401	12.209	12.346	0.0187652		12.209	14.5586	5.52086
propan-2-ol	Alcohol-Secondary		0.212	0.36	0.33	0.56	0.59	0.151584	0.285257	0.864808	0.335879		0.159903	0.285257	0.912269	0.393144		0.285257	1.35264	1.1393
butan-2-ol	Alcohol-Secondary		0.217	0.36	0.33	0.56	0.7309	0.691787	3.70834	3.94674	0.0568338		0.691253	3.70834	3.94369	0.0553916		3.70834	4.65414	0.894536
pentan-2-ol	Alcohol-Secondary		0.195	0.36	0.33	0.56	0.8718	1.21682	7.13142	6.9421	0.0358435		1.2226	7.13142	6.97512	0.0244307		7.13142	7.95564	0.679336
2-methylbutan-2-ol	Alcohol-Tertiary		0.194	0.3	0.31	0.63	0.8718	1.03661	5.07757	5.91402	0.699646		1.04076	5.07757	5.93767	0.739765		5.07757	7.95564	8.28328
2-methylpropan-2-ol	Alcohol-Tertiary		0.18	0.3	0.31	0.6	0.7309	0.595153	1.9968	3.39543	1.95616		0.509408	1.9968	2.90624	0.82709		1.9968	4.65414	7.06146
2-methylpentan-2-ol	Alcohol-Tertiary		0.169	0.3	0.31	0.64	1.0127	1.52536	9.52758	8.70236	0.68098		1.57211	9.52758	8.96909	0.311908		9.52758	11.2571	2.99139
cyclopentanol	Alcohol-Secondary-Cycloalkyl		0.427	0.54	0.32	0.56	0.763	0.742176	4.05065	4.23422	0.0336974		0.776465	4.05065	4.42984	0.143786		4.05065	4.65414	0.364201
cyclohexanol	Alcohol-Secondary-Cycloalkyl		0.46	0.54	0.32	0.57	0.904	1.2639	7.01732	7.2107	0.0373963		1.34075	7.01732	7.64914	0.399197		7.01732	7.95564	0.880447
cycloheptanol	Alcohol-Secondary-Cycloalkyl		0.513	0.54	0.32	0.58	1.045	1.79686	10.2692	10.2513	0.000321724		1.90503	10.2692	10.8684	0.359033		10.2692	11.2571	0.975937
cyclooctanol	Alcohol-Secondary-Cycloalkyl		0.566	0.54	0.32	0.58	1.1859	2.36403	13.4641	13.4871	0.000529853		2.46931	13.4641	14.0877	0.388898		13.4641	14.5586	1.19798
adamantane	Alkane-Cyclic		0.76	0.57	0	0.04	1.1918	4.32147	24.1898	24.6546	0.216011		4.22199	24.1898	24.087	0.0105573		24.1898	26.5928	5.77455
2-methylcyclohexanone	Ketone-Cycloalkyl		0.372	0.83	0	0.54	1.002	1.37547	7.47373	7.84726	0.139522		1.25423	7.47373	7.15556	0.101232		7.47373	8.92491	2.10593
cyclopropane	Alkane-Cyclic		0.408	0.23	0	0	0.4227	1.68705	9.81284	9.62487	0.03533		1.69284	9.81284	9.6579	0.0240048		9.81284	10.0853	0.0742375
propylcyclopentane	Alkane-Cyclic Branched		0.225	0.1	0	0	1.1272	4.40819	25.1597	25.1493	0.00010652		4.37618	25.1597	24.9667	0.037226		25.1597	26.5928	2.05394
pentylcyclopentane	Alkane-Cyclic Branched		0.22	0.08	0	0	1.409	5.50125	31.2642	31.3854	0.0146922		5.43888	31.2642	31.0296	0.0550325		31.2642	33.1958	3.73132
t-butylcyclohexane	Alkane-Cyclic Branched		0.3	0.1	0	0.1	1.409	5.17913	28.7539	29.5476	0.630012		5.10601	28.7539	29.1305	0.141824		28.7539	33.1958	19.7307
2-methylpyridine	Pyridine-Methyl substituted		0.598	0.75	0	0.58	0.8162	0.739763	6.38975	4.22045	4.70589		1.18617	6.38975	6.76725	0.142505		6.38975	7.58643	1.43204
3-methylpyridine	Pyridine-Methyl substituted		0.631	0.81	0	0.54	0.8162	0.833469	6.84617	4.75505	4.37275		1.18617	6.84617	6.76725	0.00622731		6.84617	7.58643	0.547997
4-methylpyridine	Pyridine-Methyl substituted		0.63	0.82	0	0.54	0.8162	0.822367	6.96027	4.69172	5.14633		1.18617	6.96027	6.76725	0.0372552		6.96027	7.58643	0.392084
2,3-dimethylpyridine	Pyridine-Methyl substituted		0.657	0.77	0	0.62	0.9571	1.15083	9.47053	6.56566	8.43824		1.64625	9.47053	9.39205	0.00615816		9.47053	9.85635	0.148855
2,4-dimethylpyridine	Pyridine-Methyl substituted		0.634	0.76	0	0.63	0.9571	1.11385	9.47053	6.35465	9.70868		1.64625	9.47053	9.39205	0.00615816		9.47053	9.85635	0.148855
2,5-dimethylpyridine	Pyridine-Methyl substituted		0.633	0.74	0	0.62	0.9571	1.16897	9.47053	6.66911	7.84795		1.64625	9.47053	9.39205	0.00615816		9.47053	9.85635	0.148855
2,6-dimethylpyridine	Pyridine-Methyl substituted		0.607	0.7	0	0.63	0.9571	1.16191	9.58463	6.62888	8.73649		1.64625	9.58463	9.39205	0.0370858		9.58463	9.85635	0.0738288
3,4-dimethylpyridine	Pyridine-Methyl substituted		0.676	0.85	0	0.62	0.9571	1.07719	9.47053	6.14552	11.0556		1.64625	9.47053	9.39205	0.00615806		9.47053	9.85635	0.148855
3,5-dimethylpyridine	Pyridine-Methyl substituted		0.659	0.79	0	0.6	0.9571	1.20008	10.1551	6.84661	10.9464		1.64625	10.1551	9.39205	0.582306		10.1551	9.85635	0.0892809
quinoline	Pyridine-Quinoline		1.268	0.97	0	0.54	1.0443	1.8928	11.5814	10.7987	0.612723		2.08394	11.5814	11.8892	0.0946943		11.5814	13.0094	2.03904
isoquinoline	Pyridine-Isoquinoline		1.211	1	0	0.54	1.0443	1.82914	11.8667	10.4355	2.04827		1.95679	11.8667	11.1638	0.494117		11.8667	13.0094	1.30574
propylbenzene	Benzene-Alkyl Substituted		0.604	0.5	0	0.15	1.1391	3.72598	21.1375	21.2572	0.0143203		3.74106	21.1375	21.3433	0.0423265		21.1375	21.7064	0.323576
butylbenzene	Benzene-Alkyl Substituted		0.6	0.51	0	0.15	1.28	4.25058	24.3039	24.2501	0.00288831		4.27241	24.3039	24.3747	0.00501336		24.3039	25.0079	0.495599
pentylbenzene	Benzene-Alkyl Substituted		0.594	0.51	0	0.15	1.4209	4.7846	27.9552	27.2968	0.433451		4.80376	27.9552	27.4061	0.301467		27.9552	28.3094	0.125459
hexylbenzene	Benzene-Alkyl Substituted		0.591	0.5	0	0.15	1.5618	5.33085	31.4924	30.4132	1.16455		5.33511	31.4924	30.4375	1.11265		31.4924	31.6109	0.0140469
isopropylbenzene	Benzene-Alkyl Substituted		0.602	0.49	0	0.16	1.1391	3.70079	20.8808	21.1135	0.0541587		3.5571	20.8808	20.2938	0.344611		20.8808	21.7064	0.681563
tert-butylbenzene	Benzene-Alkyl Substituted		0.619	0.49	0	0.18	1.28	4.17854	23.4481	23.8391	0.152895		3.90661	23.4481	22.2877	1.34647		23.4481	25.0079	2.43285
1,3-dichlorobenzene	Benzene-Dichloro		0.847	0.73	0	0.02	0.9612	3.39141	20.5385	19.3485	1.41617		3.42082	20.5385	19.5163	1.04496		20.5385	20.8774	0.114842
1,4-dichlorobenzene	Benzene-Dichloro		0.825	0.75	0	0.02	0.9612	3.35797	19.3404	19.1577	0.0333992		3.33593	19.3404	19.0319	0.0951697		19.3404	20.8774	2.36225
fluoranthene	Polycyclic aromatic		2.377	1.55	0	0.24	1.5846	5.00344	29.4385	28.5453	0.797814		5.17095	29.4385	29.501	0.00390272		29.4385	29.404	0.00118889
acenaphthene	Polycyclic aromatic		1.604	1.05	0	0.22	1.2586	3.92185	22.3641	22.3747	0.000111196		4.18755	22.3641	23.8905	2.32987		22.3641	24.5339	4.70795
fluorene	Benzene-Biphenyl		1.588	1.06	0	0.25	1.3565	4.17191	23.8475	23.8013	0.00213178		4.16359	23.8475	23.7539	0.00876287		23.8475	22.5353	1.7218
indane	Benzene-indane		0.829	0.62	0	0.15	1.0305	3.31175	18.5702	18.894	0.104806		3.33963	18.5702	19.053	0.233115		18.5702	18.4954	0.00559737
1-fluorobutane	Alkane-Monofluoro		0.016	0.26	0	0.13	0.6899	2.00443	13.0648	11.4356	2.65433		2.10405	13.0648	12.0039	1.12545		13.0648	13.1619	0.00943254
1-fluoropentane	Alkane-Monofluoro		0.002	0.31	0	0.15	0.8308	2.41206	13.293	13.7611	0.219152		2.6354	13.293	15.0353	3.03578		13.293	16.4634	10.0516
fluorobenzene	Benzene-Monofluoro		0.477	0.57	0	0.1	0.7341	2.20915	12.9507	12.6035	0.120513		2.27	12.9507	12.9507	3.01687e-11		12.9507	13.4062	0.207496
1,2-difluorobenzene	Benzene-Difluoro		0.39	0.63	0	0.06	0.7518	2.30293	13.5212	13.1385	0.146437		2.23171	13.5212	12.7322	0.622427		13.5212	13.6719	0.0227143
3-fluorophenol	Phenol-Fluoro substituted		0.667	0.98	0.68	0.17	0.7928	1.88859	11.0109	10.7747	0.0558052		1.93	11.0109	11.0109	6.65246e-18		11.0109	9.33059	2.8235
4-fluorophenol	Phenol-Fluoro substituted		0.67	0.97	0.63	0.23	0.7928	1.69152	10.0981	9.65035	0.200474		1.77	10.0981	10.0981	2.67967e-15		10.0981	9.33059	0.589065
cis-but-2-ene	Alkene-methyl substituted		0.142	0.08	0	0.05	0.6292	2.31025	13.293	13.1803	0.0126924		2.3626	13.293	13.4789	0.0345875		13.293	13.0204	0.0743018
trans-but-2-ene	Alkene-methyl substituted		0.126	0.08	0	0.05	0.6292	2.30126	13.1789	13.129	0.00248585		2.3626	13.1789	13.4789	0.0900479		13.1789	13.0204	0.0251162
2-methylbut-2-ene	Alkene-methyl substituted		0.159	0.09	0	0.08	0.7701	2.74286	15.2327	15.6484	0.172784		2.91483	15.2327	16.6295	1.95102		15.2327	16.3219	1.18629

## Sheet: 5 Expt. gas to solvent 
Table of experimental free energies(-DG0 kJ mol-1) for gas to solvent transfer
		Expt.	Expt.	Expt.	Expt.	Expt.	Expt.	Expt.	Expt.	Expt.	Expt.	Expt.	Expt.	Expt.	Expt.	Expt.	Expt.	Expt.	Expt.	Expt.	Expt.	Expt.	Expt.	Expt.	Expt.	Expt.	Expt.	Expt.	Expt.	Expt.	Expt.	Expt.	Expt.	Expt.	Expt.	Expt.
Solute name	SMILES	Water	Hexadecane	Diethyl Ether	CCl4	Dichloromethane	Chloroform	Di-n-butyl ether	Acetonitrile	Benzene	Propionitrile	Butyronitrile	Tetrahydrofuran	1,2-Dichloroethane	Chlorobenzene	Propanone	Butanone	Cyclohexanone	Methanol	Ethanol	Propan-1-ol	Butan-1-ol	Pentan-1-ol	Hexan-1-ol	Heptan-1-ol	Octan-1-ol	Decan-1-ol	Propan-2-ol	Butan-2-ol	2-Methylpropan-1-ol	2-Methylpropan-2-ol	3-Methylbutan-1-ol	Hexane	Toluene	Cyclohexane	Perfluoroalkane
n-pentane	CCCCC	-9.72155	12.3345	#N/A	13.4641	12.7795	13.4641	13.293	8.72886	12.4943	#N/A	10.9539	13.293	11.3532	13.8635	11.2962	11.8096	11.2791	9.47053	10.1551	10.3263	11.2962	11.068	11.222	11.125	11.125	#N/A	10.5545	11.068	#N/A	#N/A	#N/A	13.9206	13.1503	14.6622	8.84296
n-hexane	CCCCCC	-10.3891	15.2213	#N/A	17.0013	15.6891	16.3737	16.0885	11.1821	15.1186	12.6654	13.35	16.2026	14.3199	16.8302	13.5212	14.3769	13.9148	11.6955	12.7795	13.0077	13.9205	13.9205	14.1773	13.9205	13.9205	#N/A	13.1218	#N/A	14.0346	13.9205	13.6239	16.9443	16.0942	#N/A	10.7371
n-heptane	CCCCCCC	-11.1878	18.1024	#N/A	19.8539	18.6558	19.3404	19.2834	13.4071	#N/A	15.2327	16.0885	19.0552	17.0013	19.7968	16.0314	17.2866	16.813	14.2628	15.4609	15.6321	16.4308	#N/A	16.7389	#N/A	16.8302	#N/A	15.6321	#N/A	16.3737	16.5449	16.4936	19.9681	19.0266	#N/A	12.8347
n-octane	CCCCCCCC	-12.0321	20.9778	22.3641	23.1058	21.2231	22.25	21.9648	15.2898	22.3641	17.4007	18.3135	21.9648	19.6257	22.7635	18.4276	19.6827	19.5059	16.0885	18.0853	18.0853	18.5987	19.3404	#N/A	#N/A	18.827	18.9639	18.0853	#N/A	#N/A	19.3404	19.3975	22.6495	22.4782	23.2199	14.4882
n-nonane	CCCCCCCCC	-12.266	23.8589	#N/A	25.9584	24.0186	25.2167	#N/A	17.1154	#N/A	19.5116	20.7096	24.7603	22.193	25.7872	20.8808	22.25	21.942	18.4276	20.0821	20.2532	#N/A	#N/A	#N/A	#N/A	#N/A	#N/A	20.7096	#N/A	#N/A	#N/A	#N/A	25.7303	24.7945	#N/A	16.3966
n-decane	CCCCCCCCCC	-13.2359	26.7343	#N/A	#N/A	#N/A	#N/A	#N/A	#N/A	#N/A	#N/A	#N/A	#N/A	#N/A	#N/A	#N/A	25.2167	#N/A	#N/A	22.3641	#N/A	#N/A	#N/A	#N/A	#N/A	#N/A	#N/A	#N/A	#N/A	#N/A	#N/A	#N/A	28.6513	#N/A	#N/A	#N/A
isopentane	CCC(C)C	-9.98399	11.4844	#N/A	#N/A	#N/A	#N/A	#N/A	#N/A	#N/A	#N/A	#N/A	#N/A	#N/A	#N/A	#N/A	#N/A	10.7941	#N/A	#N/A	#N/A	#N/A	#N/A	#N/A	#N/A	#N/A	#N/A	#N/A	#N/A	#N/A	10.7257	#N/A	#N/A	#N/A	#N/A	#N/A
2-methylpentane	CCCC(C)C	-10.4975	14.28	#N/A	16.0314	14.7763	15.4609	#N/A	10.3834	#N/A	11.8667	12.6084	15.4039	13.35	15.8603	12.7795	13.6353	13.1389	11.1535	12.3231	12.266	13.0648	13.8064	#N/A	#N/A	#N/A	#N/A	12.3231	#N/A	#N/A	#N/A	#N/A	16.0886	15.1357	#N/A	10.3349
3-methylpentane	CCC(C)CC	-10.4975	14.725	#N/A	#N/A	#N/A	#N/A	#N/A	#N/A	#N/A	#N/A	#N/A	#N/A	#N/A	#N/A	#N/A	#N/A	#N/A	#N/A	#N/A	#N/A	13.35	13.9205	#N/A	#N/A	#N/A	#N/A	#N/A	#N/A	#N/A	#N/A	#N/A	#N/A	#N/A	#N/A	#N/A
3-methylhexane	CCCC(C)CC	-11.3532	17.3664	#N/A	#N/A	#N/A	#N/A	#N/A	#N/A	#N/A	#N/A	#N/A	#N/A	#N/A	#N/A	#N/A	#N/A	#N/A	#N/A	#N/A	#N/A	#N/A	#N/A	#N/A	#N/A	#N/A	#N/A	#N/A	#N/A	#N/A	#N/A	#N/A	#N/A	#N/A	#N/A	#N/A
2,2-dimethylpentane	CCCC(C)(C)C	-12.0378	15.9516	#N/A	#N/A	#N/A	#N/A	#N/A	#N/A	#N/A	#N/A	#N/A	#N/A	#N/A	#N/A	#N/A	#N/A	#N/A	#N/A	#N/A	#N/A	#N/A	#N/A	#N/A	#N/A	#N/A	#N/A	#N/A	#N/A	#N/A	#N/A	#N/A	#N/A	#N/A	#N/A	#N/A
3-methylheptane	CCCCC(C)CC	-12.4372	20.025	#N/A	#N/A	#N/A	#N/A	#N/A	#N/A	#N/A	#N/A	#N/A	#N/A	#N/A	#N/A	#N/A	#N/A	#N/A	#N/A	#N/A	#N/A	#N/A	#N/A	#N/A	#N/A	#N/A	#N/A	#N/A	#N/A	#N/A	#N/A	#N/A	#N/A	#N/A	#N/A	#N/A
2,5-dimethylhexane	CC(C)CCC(C)C	-11.5244	18.8726	#N/A	20.8808	19.3975	20.3103	#N/A	13.6353	#N/A	15.7462	16.659	20.1391	17.6859	20.7667	16.8302	17.9141	17.4748	#N/A	#N/A	#N/A	#N/A	#N/A	#N/A	#N/A	#N/A	#N/A	16.3737	#N/A	#N/A	#N/A	#N/A	20.7668	19.8311	#N/A	13.524
2,2,4-trimethylpentane	CC(C)CC(C)(C)C	-12.0949	17.7202	#N/A	#N/A	#N/A	#N/A	#N/A	#N/A	#N/A	#N/A	#N/A	19.4545	#N/A	#N/A	#N/A	16.9443	#N/A	#N/A	#N/A	15.3468	#N/A	16.2596	17.0127	#N/A	#N/A	16.3167	15.4039	#N/A	#N/A	15.0616	#N/A	#N/A	#N/A	#N/A	#N/A
2,3,4-trimethylpentane	CC(C)C(C)C(C)C	-10.7257	19.8596	#N/A	21.2231	19.7968	20.7096	#N/A	14.3199	#N/A	16.1455	17.1725	20.4814	18.1994	21.052	17.2866	18.3705	17.9826	15.1643	16.7959	16.8302	17.6916	#N/A	#N/A	#N/A	#N/A	#N/A	16.8302	#N/A	#N/A	#N/A	#N/A	20.995	#N/A	#N/A	14.0004
2-methyloctane	CCCCCCC(C)C	-12.266	22.6266	#N/A	#N/A	#N/A	#N/A	#N/A	#N/A	#N/A	#N/A	#N/A	#N/A	#N/A	#N/A	#N/A	#N/A	#N/A	#N/A	#N/A	#N/A	#N/A	#N/A	#N/A	#N/A	#N/A	#N/A	#N/A	#N/A	#N/A	#N/A	#N/A	#N/A	#N/A	#N/A	#N/A
2,2,5-trimethylhexane	CC(C)CCC(C)(C)C	-12.266	20.3502	#N/A	#N/A	#N/A	#N/A	#N/A	#N/A	#N/A	#N/A	#N/A	#N/A	#N/A	#N/A	#N/A	#N/A	#N/A	#N/A	#N/A	#N/A	#N/A	#N/A	#N/A	#N/A	#N/A	#N/A	#N/A	#N/A	#N/A	#N/A	#N/A	#N/A	#N/A	#N/A	#N/A
3,3-diethylpentane	CCC(CC)(CC)CC	-9.3	22.8947	#N/A	#N/A	#N/A	#N/A	#N/A	#N/A	#N/A	#N/A	#N/A	#N/A	#N/A	#N/A	#N/A	#N/A	#N/A	17.9712	#N/A	#N/A	#N/A	#N/A	#N/A	#N/A	#N/A	#N/A	#N/A	#N/A	#N/A	#N/A	#N/A	24.5893	#N/A	#N/A	#N/A
2-methylnonane	CCCCCCCC(C)C	-12.9507	25.405	#N/A	#N/A	#N/A	#N/A	#N/A	#N/A	#N/A	#N/A	#N/A	#N/A	#N/A	#N/A	#N/A	#N/A	#N/A	#N/A	#N/A	#N/A	#N/A	#N/A	#N/A	#N/A	#N/A	#N/A	#N/A	#N/A	#N/A	#N/A	#N/A	#N/A	#N/A	#N/A	#N/A
cyclopentane	C1CCCC1	-5.02052	14.1316	#N/A	#N/A	#N/A	#N/A	#N/A	#N/A	#N/A	#N/A	#N/A	#N/A	#N/A	#N/A	#N/A	#N/A	#N/A	10.9539	11.6385	12.0949	#N/A	#N/A	#N/A	12.9507	#N/A	#N/A	12.0949	#N/A	#N/A	#N/A	#N/A	15.461	#N/A	#N/A	#N/A
cyclohexane	C1CCCCC1	-5.13462	16.91	17.5148	18.3705	17.1725	18.5987	17.1725	#N/A	16.9443	14.3199	15.2327	17.8628	15.9173	18.4276	14.8334	15.6891	16.0428	13.8635	14.5481	14.5481	15.575	15.518	15.6891	15.575	15.4609	14.2857	14.434	15.2327	16.1455	15.3468	#N/A	17.686	#N/A	18.5417	11.1735
cyclooctane	C1CCCCCCC1	-3.59424	24.6975	#N/A	#N/A	#N/A	#N/A	#N/A	#N/A	#N/A	#N/A	#N/A	#N/A	#N/A	#N/A	#N/A	#N/A	#N/A	#N/A	#N/A	#N/A	#N/A	#N/A	#N/A	#N/A	#N/A	#N/A	#N/A	#N/A	#N/A	#N/A	#N/A	#N/A	#N/A	#N/A	#N/A
methylcyclopentane	CC1CCCC1	-6.67501	16.5848	#N/A	#N/A	#N/A	#N/A	#N/A	#N/A	#N/A	#N/A	#N/A	#N/A	#N/A	#N/A	#N/A	#N/A	#N/A	#N/A	#N/A	#N/A	#N/A	14.6622	#N/A	14.6622	#N/A	#N/A	#N/A	#N/A	#N/A	#N/A	#N/A	#N/A	#N/A	#N/A	#N/A
methylcyclohexane	CC1CCCCC1	-7.13142	18.9354	#N/A	#N/A	#N/A	#N/A	#N/A	#N/A	#N/A	16.2596	17.0584	19.5116	#N/A	#N/A	16.4308	17.2295	#N/A	#N/A	#N/A	#N/A	#N/A	#N/A	#N/A	17.4007	17.4007	#N/A	15.8603	#N/A	#N/A	#N/A	#N/A	#N/A	#N/A	#N/A	#N/A
ethylcyclohexane	CCC1CCCCC1	-9.01412	22.1188	#N/A	23.277	21.7936	22.7635	#N/A	16.3737	#N/A	18.0853	19.1122	22.3641	20.3673	23.1629	18.9411	20.1391	20.2418	16.8929	18.6387	18.7129	19.6371	#N/A	#N/A	#N/A	#N/A	#N/A	18.6558	#N/A	#N/A	#N/A	#N/A	22.6495	#N/A	#N/A	14.6251
cis-1,2-dimethylcyclohexane	C[C@@H]1([C@@H](CCCC1)(C))	-6.67501	21.9477	#N/A	#N/A	#N/A	#N/A	#N/A	#N/A	#N/A	#N/A	#N/A	#N/A	#N/A	#N/A	#N/A	#N/A	#N/A	#N/A	#N/A	#N/A	#N/A	#N/A	#N/A	#N/A	#N/A	#N/A	#N/A	#N/A	#N/A	#N/A	#N/A	#N/A	#N/A	#N/A	#N/A
trans-1,4-dimethylcyclohexane	CC1CCC(C)CC1	-7.98719	20.761	#N/A	#N/A	#N/A	#N/A	#N/A	#N/A	#N/A	#N/A	#N/A	#N/A	#N/A	#N/A	#N/A	#N/A	#N/A	#N/A	#N/A	#N/A	#N/A	#N/A	#N/A	#N/A	#N/A	#N/A	#N/A	#N/A	#N/A	#N/A	#N/A	#N/A	#N/A	#N/A	#N/A
tetrachloromethane	[Cl]C([Cl])([Cl])[Cl]	-0.342308	16.1056	18.3705	18.4846	#N/A	18.5417	17.4007	15.2898	#N/A	16.3167	#N/A	19.4545	17.3436	#N/A	17.3436	17.3436	18.0682	15.1757	15.6891	15.6891	16.2026	#N/A	16.0428	#N/A	15.9173	#N/A	#N/A	#N/A	#N/A	15.6321	#N/A	17.2866	#N/A	#N/A	#N/A
benzene	c1ccccc1	3.59424	15.8945	#N/A	18.4846	20.0821	19.3404	17.1725	17.4577	19.0552	18.4276	18.4276	19.8539	18.9411	18.4846	18.3135	18.7699	18.8098	15.8032	15.8603	15.8603	16.3737	16.1455	#N/A	16.0314	15.9744	15.033	15.2327	15.8032	15.518	15.518	#N/A	16.7732	18.6444	16.7018	#N/A
water	O([H])[H]	26.7571	1.39776	#N/A	3.65129	11.068	8.78591	#N/A	#N/A	7.13142	#N/A	#N/A	16.61	#N/A	#N/A	18.36	#N/A	#N/A	23.2199	21.2231	#N/A	#N/A	#N/A	#N/A	#N/A	#N/A	#N/A	19.44	#N/A	#N/A	#N/A	#N/A	3.08079	7.07437	1.65449	1.8827
methanol	CO	21.3372	5.53398	14.1487	8.55771	13.0648	13.7494	11.068	16.7161	10.7827	#N/A	15.2898	16.2026	12.3231	9.52758	17.2866	16.0314	#N/A	20.5385	19.3975	17.9712	17.2295	17.5148	#N/A	#N/A	16.2026	14.434	18.7129	18.7699	18.0282	19.3404	17.5034	6.54953	9.12822	5.553	#N/A
ethanol	CCO	20.9379	8.47213	#N/A	11.7526	15.518	15.9744	13.6353	18.1423	14.3199	#N/A	17.1725	19.0552	15.0045	13.0648	18.4846	18.0853	18.0396	22.193	21.2802	20.025	20.3103	19.4545	#N/A	#N/A	18.2564	17.1325	20.2532	#N/A	20.025	21.109	20.025	9.53903	13.9205	9.84136	6.53809
propan-1-ol	CCCO	20.3103	11.5871	#N/A	14.7763	#N/A	18.5987	#N/A	#N/A	16.2026	#N/A	19.5116	21.6795	17.9712	16.0314	#N/A	20.7667	#N/A	24.8744	23.9616	22.7064	#N/A	22.7064	#N/A	#N/A	20.9949	20.0536	22.9347	#N/A	22.7635	23.2199	#N/A	12.6141	15.518	11.7868	7.25693
butan-1-ol	CCCCO	19.7398	14.8391	#N/A	18.5987	#N/A	22.1359	19.5686	#N/A	18.5987	#N/A	22.4212	#N/A	20.5955	19.3404	#N/A	23.6763	#N/A	26.0154	#N/A	25.502	25.502	25.3879	#N/A	#N/A	23.9045	23.9331	25.502	25.502	25.6161	26.3007	#N/A	15.6436	18.0282	15.4894	9.40207
pentan-1-ol	CCCCCO	19.1122	17.7202	#N/A	21.3943	#N/A	25.1026	#N/A	#N/A	21.3372	#N/A	#N/A	#N/A	23.2199	21.9648	#N/A	#N/A	#N/A	28.1263	#N/A	28.3545	28.2975	28.2404	27.9552	#N/A	26.7571	26.7057	28.5827	#N/A	28.6398	29.0962	#N/A	19.3234	21.6225	16.7636	#N/A
hexan-1-ol	CCCCCCO	18.4276	20.5955	#N/A	24.0186	#N/A	28.0693	#N/A	#N/A	25.6731	#N/A	26.9853	#N/A	25.3879	25.2167	#N/A	29.0962	#N/A	30.1802	#N/A	#N/A	#N/A	#N/A	29.8949	#N/A	29.5526	29.2331	#N/A	#N/A	#N/A	#N/A	#N/A	20.9836	25.6161	21.0329	#N/A
heptan-1-ol	CCCCCCCO	17.6289	23.4766	#N/A	26.5859	#N/A	31.3783	#N/A	#N/A	28.6398	#N/A	30.4084	#N/A	28.4116	28.2404	#N/A	#N/A	#N/A	31.7776	#N/A	#N/A	#N/A	#N/A	33.7744	33.1069	#N/A	#N/A	#N/A	#N/A	#N/A	#N/A	#N/A	23.3855	28.2404	23.8475	#N/A
octan-1-ol	CCCCCCCCO	17.1154	26.352	#N/A	29.0391	#N/A	#N/A	#N/A	#N/A	33.7174	#N/A	32.4622	#N/A	#N/A	#N/A	#N/A	34.2879	#N/A	33.6033	#N/A	#N/A	#N/A	#N/A	35.8853	#N/A	34.402	#N/A	#N/A	#N/A	#N/A	#N/A	#N/A	#N/A	#N/A	#N/A	#N/A
nonan-1-ol	CCCCCCCCCO	16.2596	29.2103	#N/A	#N/A	#N/A	#N/A	#N/A	#N/A	#N/A	#N/A	#N/A	#N/A	#N/A	#N/A	#N/A	#N/A	#N/A	35.6571	#N/A	#N/A	#N/A	#N/A	#N/A	#N/A	#N/A	37.4828	#N/A	#N/A	#N/A	#N/A	#N/A	#N/A	#N/A	#N/A	#N/A
decan-1-ol	CCCCCCCCCCO	15.2327	32.0058	#N/A	#N/A	#N/A	#N/A	#N/A	#N/A	#N/A	#N/A	#N/A	#N/A	#N/A	#N/A	#N/A	#N/A	#N/A	#N/A	#N/A	40.6776	#N/A	#N/A	#N/A	#N/A	#N/A	40.1071	40.8488	#N/A	#N/A	#N/A	#N/A	32.1771	#N/A	#N/A	#N/A
dimethylether	COC	7.98719	7.3311	#N/A	#N/A	#N/A	#N/A	#N/A	#N/A	#N/A	#N/A	#N/A	#N/A	#N/A	9.12822	#N/A	#N/A	#N/A	9.64168	#N/A	#N/A	8.55771	8.27245	#N/A	#N/A	7.81604	#N/A	8.90001	8.78591	8.78591	9.41348	8.31239	7.49088	#N/A	#N/A	#N/A
diethyl ether	CCOCC	7.30258	11.4959	15.0616	14.7193	16.3737	17.4007	13.8635	#N/A	#N/A	#N/A	#N/A	14.6622	14.3769	16.8872	13.5782	#N/A	#N/A	13.6353	#N/A	#N/A	12.9507	13.0648	#N/A	#N/A	12.4943	12.266	#N/A	#N/A	#N/A	#N/A	#N/A	#N/A	#N/A	12.6654	8.34662
dipropylether	CCCOCCC	5.13462	16.853	#N/A	20.1962	20.9949	#N/A	#N/A	#N/A	#N/A	#N/A	#N/A	#N/A	#N/A	#N/A	#N/A	18.2564	#N/A	16.4878	#N/A	#N/A	17.2866	#N/A	17.2295	#N/A	16.9443	#N/A	16.8302	17.3436	17.4577	17.2866	#N/A	#N/A	#N/A	#N/A	11.8667
dibutylether	CCCCOCCCC	3.48013	22.387	#N/A	26.2436	#N/A	#N/A	22.9347	#N/A	#N/A	#N/A	#N/A	25.6275	24.9885	#N/A	#N/A	#N/A	#N/A	20.7667	#N/A	#N/A	22.3641	#N/A	#N/A	#N/A	22.193	#N/A	#N/A	#N/A	#N/A	#N/A	#N/A	24.7262	#N/A	#N/A	16.562
chlorobenzene	[Cl]c1ccccc1	4.67821	20.8637	#N/A	23.6193	24.7032	24.0757	#N/A	#N/A	#N/A	#N/A	#N/A	25.2738	#N/A	23.8475	23.6193	#N/A	#N/A	20.9379	20.9949	#N/A	#N/A	21.7936	#N/A	#N/A	#N/A	#N/A	20.5955	21.2802	21.2802	21.052	21.4285	21.7937	#N/A	21.2659	#N/A
1,2-dichlorobenzene	[Cl]c1ccccc1[Cl]	5.70514	25.7758	#N/A	28.4116	#N/A	#N/A	#N/A	#N/A	#N/A	#N/A	#N/A	29.7238	#N/A	#N/A	#N/A	#N/A	#N/A	#N/A	#N/A	#N/A	#N/A	#N/A	#N/A	#N/A	24.8744	#N/A	#N/A	#N/A	#N/A	#N/A	#N/A	25.6732	#N/A	25.1597	#N/A
1,2-dichloroethane	[Cl]CC[Cl]	7.47373	14.6793	18.5987	17.9712	#N/A	19.6257	17.4007	#N/A	#N/A	#N/A	#N/A	20.9379	19.7968	#N/A	#N/A	20.025	#N/A	#N/A	#N/A	#N/A	16.659	#N/A	#N/A	#N/A	15.8603	#N/A	#N/A	#N/A	#N/A	#N/A	#N/A	15.6892	#N/A	#N/A	#N/A
methane	C	-8.34091	-1.84276	0.114103	-0.798719	#N/A	#N/A	#N/A	#N/A	#N/A	#N/A	#N/A	-1.02692	#N/A	-1.8827	-1.25513	#N/A	#N/A	-1.54039	-1.65449	-1.65449	-1.76859	-1.8827	-1.96827	-2.01391	-2.16795	-2.3277	-1.8827	#N/A	#N/A	#N/A	#N/A	-0.142629	#N/A	#N/A	-0.262436
ethane	CC	-7.62206	2.80693	4.84937	4.16475	#N/A	#N/A	#N/A	#N/A	#N/A	#N/A	#N/A	3.53719	#N/A	3.36603	2.85257	#N/A	2.20789	2.16795	2.51026	2.56731	2.62436	2.51026	2.43609	2.51026	2.39616	#N/A	2.73847	2.56731	2.68141	2.85257	#N/A	4.31881	#N/A	#N/A	2.13943
propane	CCC	-8.19258	5.99039	#N/A	7.64488	#N/A	#N/A	#N/A	#N/A	#N/A	#N/A	#N/A	#N/A	#N/A	6.73206	5.70514	#N/A	#N/A	4.79232	5.19168	5.53398	5.64809	5.53398	#N/A	4.96347	5.53398	#N/A	5.07757	#N/A	5.53398	5.81924	5.5511	7.53082	#N/A	8.72886	4.37014
butane	CCCC	-8.67181	9.2138	#N/A	11.1821	#N/A	#N/A	10.2122	#N/A	#N/A	#N/A	#N/A	#N/A	#N/A	9.69873	8.90001	9.64168	#N/A	7.24552	7.98719	8.27245	7.81604	8.50065	#N/A	8.15835	8.72886	#N/A	8.50065	#N/A	8.50065	8.67181	8.4436	10.6687	#N/A	11.9808	#N/A
trimethylamine	CN(C)C	13.4071	9.24232	9.86989	12.0949	#N/A	16.3167	#N/A	#N/A	11.6955	#N/A	#N/A	#N/A	#N/A	11.6955	10.7257	#N/A	#N/A	#N/A	15.2327	14.6052	12.1519	#N/A	#N/A	#N/A	11.068	#N/A	#N/A	#N/A	#N/A	#N/A	#N/A	10.9881	11.3532	11.0109	#N/A
triethylamine	CCN(CC)CC	13.4641	17.3436	18.5987	20.1962	#N/A	24.0757	#N/A	#N/A	#N/A	#N/A	#N/A	19.2263	18.3135	19.1122	16.9443	17.4007	17.1953	21.9077	20.3673	19.968	20.3103	20.7667	#N/A	#N/A	#N/A	#N/A	18.884	20.1391	#N/A	#N/A	#N/A	18.77	#N/A	#N/A	#N/A
piperidine	C1CCNCC1	21.2802	17.5433	#N/A	#N/A	#N/A	26.643	#N/A	#N/A	21.052	#N/A	#N/A	21.8507	#N/A	#N/A	#N/A	#N/A	#N/A	#N/A	#N/A	#N/A	#N/A	#N/A	#N/A	#N/A	23.0488	#N/A	#N/A	#N/A	#N/A	#N/A	#N/A	#N/A	#N/A	#N/A	#N/A
diethylamine	CCNCC	17.0584	13.6638	#N/A	17.2295	#N/A	21.5654	#N/A	#N/A	16.8302	#N/A	#N/A	#N/A	16.7161	#N/A	15.6891	#N/A	#N/A	21.2802	#N/A	#N/A	#N/A	#N/A	#N/A	#N/A	#N/A	#N/A	#N/A	#N/A	#N/A	#N/A	#N/A	14.9475	15.6891	14.7193	#N/A
dipropylamine	CCCNCCC	15.2898	19.1179	#N/A	#N/A	#N/A	#N/A	#N/A	#N/A	21.2802	#N/A	#N/A	#N/A	#N/A	#N/A	#N/A	#N/A	#N/A	#N/A	#N/A	#N/A	#N/A	#N/A	#N/A	#N/A	#N/A	#N/A	#N/A	#N/A	#N/A	#N/A	#N/A	#N/A	21.9077	#N/A	#N/A
dibutylamine	CCCCNCCCC	13.5782	24.8116	#N/A	#N/A	#N/A	#N/A	#N/A	#N/A	#N/A	#N/A	#N/A	#N/A	#N/A	#N/A	#N/A	#N/A	#N/A	#N/A	#N/A	#N/A	#N/A	#N/A	#N/A	#N/A	#N/A	#N/A	#N/A	#N/A	#N/A	#N/A	#N/A	#N/A	#N/A	#N/A	#N/A
methylamine	CN	19.0552	7.41668	#N/A	9.75578	#N/A	13.2359	#N/A	#N/A	11.125	#N/A	#N/A	#N/A	#N/A	9.01412	#N/A	#N/A	#N/A	#N/A	#N/A	#N/A	12.0949	#N/A	#N/A	#N/A	10.8398	#N/A	#N/A	#N/A	#N/A	#N/A	#N/A	6.85761	11.068	#N/A	#N/A
ethylamine	CCN	18.827	9.56752	#N/A	11.5814	#N/A	16.8302	#N/A	#N/A	11.4103	#N/A	#N/A	#N/A	13.35	15.6891	#N/A	#N/A	#N/A	#N/A	#N/A	#N/A	#N/A	#N/A	#N/A	#N/A	#N/A	#N/A	#N/A	#N/A	#N/A	#N/A	#N/A	9.58467	11.1821	8.62427	#N/A
n-propylamine	CCCN	18.3705	12.2147	#N/A	15.0045	#N/A	19.7968	12.209	#N/A	15.4039	#N/A	#N/A	#N/A	16.8872	15.0045	#N/A	#N/A	#N/A	#N/A	#N/A	#N/A	#N/A	#N/A	#N/A	#N/A	#N/A	#N/A	#N/A	#N/A	#N/A	#N/A	#N/A	12.8937	14.6622	12.7681	#N/A
n-butylamine	CCCCN	17.743	14.936	#N/A	17.9712	#N/A	22.0218	15.2898	#N/A	18.0853	#N/A	#N/A	#N/A	18.7699	17.4577	#N/A	#N/A	#N/A	#N/A	#N/A	#N/A	#N/A	#N/A	#N/A	#N/A	20.5955	#N/A	#N/A	#N/A	#N/A	#N/A	#N/A	#N/A	18.5417	14.957	#N/A
pentylamine	CCCCCN	17.1154	17.9084	#N/A	#N/A	#N/A	#N/A	#N/A	#N/A	#N/A	#N/A	#N/A	#N/A	#N/A	#N/A	#N/A	#N/A	#N/A	#N/A	#N/A	#N/A	#N/A	#N/A	#N/A	#N/A	#N/A	#N/A	#N/A	#N/A	#N/A	#N/A	#N/A	#N/A	#N/A	#N/A	#N/A
hexylamine	CCCCCCN	16.5449	20.8523	#N/A	#N/A	#N/A	#N/A	#N/A	#N/A	#N/A	#N/A	#N/A	#N/A	#N/A	#N/A	#N/A	#N/A	#N/A	#N/A	#N/A	#N/A	#N/A	#N/A	#N/A	#N/A	#N/A	#N/A	#N/A	#N/A	#N/A	#N/A	#N/A	#N/A	#N/A	#N/A	#N/A
heptylamine	CCCCCCCN	15.8603	23.6934	#N/A	#N/A	#N/A	#N/A	#N/A	#N/A	#N/A	#N/A	#N/A	#N/A	#N/A	#N/A	#N/A	#N/A	#N/A	#N/A	#N/A	#N/A	#N/A	#N/A	#N/A	#N/A	#N/A	#N/A	#N/A	#N/A	#N/A	#N/A	#N/A	#N/A	#N/A	#N/A	#N/A
n-octylamine	CCCCCCCCN	15.2898	26.2436	#N/A	#N/A	#N/A	#N/A	#N/A	#N/A	#N/A	#N/A	#N/A	#N/A	#N/A	#N/A	#N/A	#N/A	#N/A	#N/A	#N/A	#N/A	#N/A	#N/A	#N/A	#N/A	#N/A	#N/A	#N/A	#N/A	#N/A	#N/A	#N/A	#N/A	#N/A	#N/A	#N/A
cyclohexylamine	NC1CCCCC1	19.2263	21.6567	#N/A	#N/A	#N/A	#N/A	#N/A	#N/A	#N/A	#N/A	#N/A	#N/A	#N/A	#N/A	#N/A	#N/A	#N/A	#N/A	#N/A	#N/A	#N/A	#N/A	#N/A	#N/A	#N/A	#N/A	#N/A	#N/A	#N/A	#N/A	#N/A	#N/A	#N/A	#N/A	#N/A
ethyl benzene	CCc1ccccc1	3.30898	21.554	#N/A	23.7334	#N/A	24.418	#N/A	#N/A	#N/A	#N/A	23.6763	25.2738	#N/A	24.418	#N/A	23.6193	#N/A	20.4244	20.025	20.6184	20.8123	20.9721	21.109	#N/A	21.2231	#N/A	20.1391	#N/A	20.7096	20.8808	#N/A	22.3757	#N/A	21.2231	#N/A
toluene	Cc1ccccc1	3.70834	18.9696	21.2231	21.7936	22.9347	23.1629	20.4244	19.8539	22.25	21.3372	21.109	22.7635	22.193	21.7936	20.8238	21.3372	21.6453	18.1994	18.7129	18.884	18.884	18.7699	18.9525	#N/A	18.884	#N/A	18.3135	#N/A	18.2564	18.4276	18.827	19.854	#N/A	20.0821	12.9221
o-xylene	Cc1ccccc1C	3.76539	22.4725	#N/A	25.8443	#N/A	26.0725	#N/A	#N/A	#N/A	#N/A	#N/A	#N/A	25.6161	#N/A	#N/A	#N/A	#N/A	#N/A	#N/A	#N/A	#N/A	21.6795	#N/A	#N/A	22.25	#N/A	#N/A	#N/A	#N/A	#N/A	#N/A	#N/A	25.5875	22.7064	#N/A
m-xylene	Cc1cccc(C)c1	3.48013	21.902	#N/A	23.8475	#N/A	24.475	#N/A	#N/A	#N/A	#N/A	#N/A	#N/A	24.9885	#N/A	#N/A	#N/A	#N/A	#N/A	#N/A	#N/A	#N/A	#N/A	#N/A	#N/A	21.6225	#N/A	#N/A	#N/A	#N/A	#N/A	#N/A	#N/A	#N/A	22.5733	#N/A
p-xylene	Cc1ccc(C)cc1	3.36603	21.902	#N/A	23.9616	#N/A	#N/A	#N/A	#N/A	#N/A	#N/A	#N/A	#N/A	24.9315	#N/A	#N/A	#N/A	#N/A	#N/A	21.2802	#N/A	#N/A	#N/A	#N/A	#N/A	21.6225	#N/A	#N/A	#N/A	20.6526	#N/A	#N/A	#N/A	#N/A	22.0504	#N/A
mesitylene	Cc1cc(C)cc(C)c1	3.76539	24.7831	#N/A	#N/A	#N/A	#N/A	#N/A	#N/A	#N/A	#N/A	#N/A	#N/A	#N/A	#N/A	#N/A	#N/A	#N/A	#N/A	#N/A	#N/A	#N/A	#N/A	#N/A	#N/A	#N/A	#N/A	#N/A	#N/A	#N/A	#N/A	#N/A	#N/A	#N/A	#N/A	#N/A
1,2,4,5-tetramethylbenzene	Cc1cc(C)c(C)cc1C	3.02372	28.6911	30.705	#N/A	#N/A	#N/A	30.0775	#N/A	#N/A	#N/A	#N/A	#N/A	#N/A	#N/A	#N/A	#N/A	#N/A	25.8272	26.9225	27.3618	28.075	28.075	28.2404	28.3488	#N/A	28.617	27.1393	27.6984	27.2477	27.6984	27.727	30.2887	#N/A	#N/A	#N/A
propanone	CC(C)=O	16.1455	9.67591	14.6622	13.5782	19.3404	18.7699	12.8366	17.9141	15.8603	#N/A	#N/A	16.2596	17.8571	15.1757	17.3436	16.659	15.9116	16.4878	15.8032	#N/A	14.6622	14.2058	#N/A	#N/A	13.1789	#N/A	14.0346	#N/A	#N/A	#N/A	#N/A	11.1992	15.0045	10.7371	#N/A
butanone	CCC(C)=O	15.518	13.0476	17.2866	17.0584	22.0218	22.0789	15.575	19.8539	18.6558	#N/A	19.2834	18.9981	20.7667	18.7699	19.5116	19.1693	18.7927	19.0552	18.0282	17.5148	17.2295	16.2596	16.214	#N/A	15.8032	#N/A	17.0584	17.4007	17.0584	17.743	17.1725	14.2059	17.8571	14.1145	10.0582
pentan-2-one	CCCC(C)=O	14.7193	15.7177	#N/A	20.0821	#N/A	#N/A	#N/A	#N/A	21.5084	#N/A	#N/A	#N/A	#N/A	22.0789	#N/A	#N/A	#N/A	20.4244	#N/A	#N/A	#N/A	#N/A	#N/A	#N/A	18.1994	#N/A	#N/A	#N/A	#N/A	#N/A	#N/A	#N/A	20.9949	17.0013	#N/A
pentan-3-one	CCC(=O)CC	14.2628	16.0371	#N/A	#N/A	#N/A	#N/A	#N/A	#N/A	#N/A	#N/A	#N/A	#N/A	#N/A	#N/A	#N/A	#N/A	#N/A	#N/A	#N/A	#N/A	#N/A	#N/A	#N/A	#N/A	18.2564	#N/A	#N/A	#N/A	#N/A	#N/A	#N/A	#N/A	#N/A	17.9712	#N/A
hexan-2-one	CCCCC(C)=O	13.7494	18.7471	#N/A	22.4212	#N/A	#N/A	#N/A	#N/A	24.0757	#N/A	#N/A	#N/A	#N/A	24.418	#N/A	#N/A	#N/A	21.7936	#N/A	#N/A	#N/A	#N/A	#N/A	#N/A	20.9949	#N/A	#N/A	#N/A	#N/A	#N/A	#N/A	19.5687	23.4481	19.5496	#N/A
hexan-3-one	CCCC(=O)CC	13.7494	18.6615	#N/A	#N/A	#N/A	#N/A	#N/A	#N/A	#N/A	#N/A	#N/A	#N/A	#N/A	#N/A	#N/A	#N/A	#N/A	#N/A	#N/A	#N/A	#N/A	#N/A	#N/A	#N/A	#N/A	#N/A	#N/A	#N/A	#N/A	#N/A	#N/A	#N/A	#N/A	#N/A	#N/A
heptan-4-one	CCCC(=O)CCC	12.8366	21.1375	#N/A	#N/A	#N/A	#N/A	23.5052	#N/A	#N/A	#N/A	#N/A	#N/A	#N/A	#N/A	#N/A	#N/A	#N/A	24.1327	#N/A	#N/A	#N/A	#N/A	#N/A	#N/A	#N/A	#N/A	#N/A	#N/A	#N/A	#N/A	#N/A	#N/A	#N/A	#N/A	#N/A
4-methylpentan-2-one	CC(C)CC(C)=O	12.7795	17.6232	#N/A	#N/A	#N/A	#N/A	#N/A	#N/A	#N/A	#N/A	#N/A	#N/A	#N/A	#N/A	#N/A	#N/A	#N/A	#N/A	#N/A	#N/A	#N/A	#N/A	#N/A	#N/A	#N/A	#N/A	#N/A	#N/A	#N/A	#N/A	#N/A	#N/A	#N/A	#N/A	#N/A
cyclopentanone	O=C1CCCC1	19.6827	18.3762	#N/A	23.1629	#N/A	#N/A	20.1391	#N/A	#N/A	#N/A	#N/A	#N/A	26.1866	#N/A	#N/A	#N/A	#N/A	#N/A	#N/A	#N/A	#N/A	#N/A	#N/A	#N/A	20.9379	#N/A	#N/A	#N/A	#N/A	#N/A	#N/A	#N/A	#N/A	#N/A	#N/A
cyclohexanone	O=C1CCCCC1	20.5385	21.6339	#N/A	26.0725	#N/A	#N/A	#N/A	#N/A	#N/A	#N/A	#N/A	#N/A	28.3545	#N/A	#N/A	#N/A	26.5346	#N/A	#N/A	#N/A	#N/A	#N/A	#N/A	#N/A	#N/A	#N/A	#N/A	#N/A	#N/A	#N/A	#N/A	20.8238	#N/A	#N/A	#N/A
cycloheptanone	O=C1CCCCCC1	19.5116	24.9657	#N/A	#N/A	#N/A	#N/A	#N/A	#N/A	#N/A	#N/A	#N/A	#N/A	#N/A	#N/A	#N/A	#N/A	#N/A	#N/A	#N/A	#N/A	#N/A	#N/A	#N/A	#N/A	#N/A	#N/A	#N/A	#N/A	#N/A	#N/A	#N/A	#N/A	#N/A	#N/A	#N/A
cyclooctanone	O=C1CCCCCCC1	19.2834	28.4173	#N/A	#N/A	#N/A	#N/A	#N/A	#N/A	#N/A	#N/A	#N/A	#N/A	#N/A	#N/A	#N/A	#N/A	#N/A	#N/A	#N/A	#N/A	#N/A	#N/A	#N/A	#N/A	#N/A	#N/A	#N/A	#N/A	#N/A	#N/A	#N/A	#N/A	#N/A	#N/A	#N/A
phenol	Oc1ccccc1	27.6699	21.4855	#N/A	25.9584	31.3212	29.4956	#N/A	#N/A	29.7808	#N/A	#N/A	#N/A	31.1501	29.0962	#N/A	#N/A	#N/A	#N/A	#N/A	#N/A	#N/A	#N/A	#N/A	#N/A	32.4052	#N/A	#N/A	#N/A	#N/A	#N/A	#N/A	20.9494	28.9821	23.0297	12.7225
3-methylphenol	Cc1cccc(O)c1	26.2436	24.5891	#N/A	#N/A	#N/A	31.3212	#N/A	#N/A	#N/A	#N/A	#N/A	#N/A	28.925	#N/A	#N/A	#N/A	#N/A	#N/A	#N/A	#N/A	#N/A	#N/A	#N/A	#N/A	#N/A	#N/A	#N/A	#N/A	#N/A	#N/A	#N/A	24.4181	31.6065	21.4894	#N/A
4-methylphenol	Cc1ccc(O)cc1	25.6731	24.6006	#N/A	26.9282	32.234	31.7206	#N/A	#N/A	30.7507	#N/A	#N/A	#N/A	32.4052	30.2372	#N/A	#N/A	#N/A	#N/A	#N/A	#N/A	#N/A	#N/A	#N/A	#N/A	#N/A	#N/A	#N/A	#N/A	#N/A	#N/A	#N/A	23.7335	#N/A	24.8744	15.2327
3,4-dimethylphenol	Cc1ccc(O)cc1C	27.2135	28.4116	#N/A	#N/A	#N/A	#N/A	#N/A	#N/A	#N/A	#N/A	#N/A	#N/A	#N/A	34.1738	#N/A	#N/A	#N/A	#N/A	#N/A	#N/A	#N/A	#N/A	#N/A	#N/A	#N/A	#N/A	#N/A	#N/A	#N/A	#N/A	#N/A	28.8054	#N/A	#N/A	#N/A
3,5-dimethylphenol	Cc1cc(C)cc(O)c1	26.2436	27.7041	#N/A	30.9218	#N/A	#N/A	#N/A	#N/A	#N/A	#N/A	#N/A	#N/A	#N/A	33.4321	#N/A	#N/A	#N/A	#N/A	#N/A	#N/A	#N/A	#N/A	#N/A	#N/A	#N/A	#N/A	#N/A	#N/A	#N/A	#N/A	#N/A	28.309	#N/A	#N/A	#N/A
3-chlorophenol	Oc1cccc([Cl])c1	27.6699	27.2306	#N/A	30.4654	34.9725	33.4892	#N/A	#N/A	#N/A	#N/A	#N/A	#N/A	34.9725	33.3751	#N/A	#N/A	#N/A	#N/A	#N/A	#N/A	#N/A	#N/A	#N/A	#N/A	#N/A	#N/A	#N/A	#N/A	#N/A	#N/A	#N/A	27.265	#N/A	#N/A	#N/A
4-chlorophenol	Oc1ccc([Cl])cc1	29.4385	27.242	#N/A	31.7206	#N/A	#N/A	#N/A	#N/A	#N/A	#N/A	#N/A	#N/A	37.0263	35.3719	#N/A	#N/A	#N/A	#N/A	#N/A	#N/A	#N/A	#N/A	#N/A	#N/A	#N/A	#N/A	#N/A	#N/A	#N/A	#N/A	#N/A	28.9138	#N/A	#N/A	17.743
3,4-dichlorophenol	Oc1ccc([Cl])c([Cl])c1	30.9218	31.2642	#N/A	#N/A	#N/A	#N/A	#N/A	#N/A	#N/A	#N/A	#N/A	#N/A	#N/A	#N/A	#N/A	#N/A	#N/A	#N/A	#N/A	#N/A	#N/A	#N/A	#N/A	#N/A	#N/A	#N/A	#N/A	#N/A	#N/A	#N/A	#N/A	#N/A	#N/A	#N/A	#N/A
3,5-dichlorophenol	Oc1cc([Cl])cc([Cl])c1	27.5558	29.8036	#N/A	#N/A	#N/A	#N/A	#N/A	#N/A	#N/A	#N/A	#N/A	#N/A	#N/A	#N/A	#N/A	#N/A	#N/A	#N/A	#N/A	#N/A	#N/A	#N/A	#N/A	#N/A	#N/A	#N/A	#N/A	#N/A	#N/A	#N/A	#N/A	#N/A	#N/A	#N/A	#N/A
chloroethane	[Cl]CC	2.62436	9.57322	#N/A	#N/A	#N/A	#N/A	#N/A	#N/A	#N/A	#N/A	#N/A	#N/A	#N/A	12.3801	#N/A	#N/A	#N/A	11.0109	#N/A	10.6116	10.4404	10.3263	#N/A	#N/A	#N/A	#N/A	10.3263	10.0981	10.1551	10.2122	10.1666	10.8855	#N/A	#N/A	#N/A
1-chloropropane	CCC[Cl]	1.36923	12.5627	#N/A	15.4609	#N/A	15.1186	#N/A	#N/A	#N/A	#N/A	#N/A	#N/A	15.4609	#N/A	#N/A	15.4039	15.3411	#N/A	#N/A	#N/A	13.2359	#N/A	#N/A	#N/A	12.7795	#N/A	#N/A	#N/A	#N/A	#N/A	#N/A	14.0918	#N/A	#N/A	#N/A
1-chlorobutane	CCCC[Cl]	0.684616	15.5294	18.3135	18.0282	#N/A	#N/A	17.1725	#N/A	#N/A	#N/A	#N/A	#N/A	18.5417	18.1994	17.8	#N/A	#N/A	#N/A	#N/A	15.0045	#N/A	#N/A	#N/A	#N/A	15.518	15.3468	#N/A	15.575	15.575	15.4609	#N/A	16.8302	#N/A	#N/A	#N/A
1,3-dichloropropane	[Cl]CCC[Cl]	7.93014	17.7202	#N/A	21.7366	#N/A	#N/A	#N/A	#N/A	#N/A	#N/A	#N/A	#N/A	#N/A	#N/A	23.5622	#N/A	#N/A	#N/A	#N/A	#N/A	#N/A	#N/A	#N/A	#N/A	#N/A	#N/A	#N/A	#N/A	#N/A	#N/A	#N/A	18.5418	#N/A	#N/A	#N/A
1-chloropentane	CCCCC[Cl]	0.285257	18.3877	#N/A	#N/A	#N/A	#N/A	20.025	#N/A	#N/A	#N/A	#N/A	23.7277	#N/A	#N/A	20.3103	#N/A	#N/A	#N/A	#N/A	#N/A	#N/A	#N/A	#N/A	#N/A	#N/A	#N/A	#N/A	#N/A	#N/A	#N/A	#N/A	20.0023	#N/A	#N/A	#N/A
1-chloroheptane	CCCCCCC[Cl]	-1.19808	24.0072	#N/A	#N/A	#N/A	#N/A	#N/A	#N/A	#N/A	#N/A	#N/A	#N/A	#N/A	#N/A	#N/A	#N/A	#N/A	#N/A	#N/A	#N/A	#N/A	#N/A	#N/A	#N/A	#N/A	#N/A	#N/A	#N/A	#N/A	#N/A	#N/A	#N/A	#N/A	#N/A	#N/A
naphthalene	c1ccc2ccccc2c1	10.041	29.4442	32.6334	31.8917	33.8885	32.9757	#N/A	32.1199	#N/A	#N/A	#N/A	34.3449	33.5462	32.9186	32.8045	#N/A	32.2911	29.3244	29.7238	29.6097	29.6667	28.8109	29.7808	#N/A	29.6097	#N/A	28.868	28.7539	29.6667	28.6398	#N/A	30.2944	#N/A	29.6952	#N/A
phenanthrene	c1ccc2c(c1)ccc3ccccc23	15.9744	43.5416	#N/A	45.9264	#N/A	44.8424	44.0437	44.1007	#N/A	46.4398	46.7251	48.0373	#N/A	#N/A	47.1244	47.1815	47.5238	41.3052	41.9898	41.6475	41.3565	41.8187	#N/A	42.2865	42.9026	#N/A	40.3353	40.3353	39.993	39.936	40.6776	41.9444	#N/A	42.2979	#N/A
﻿anthracene	c1ccc2cc3ccccc3cc2c1	17.2866	43.1765	45.4699	46.611	49.1783	47.9232	44.443	43.7014	47.8091	46.0405	46.611	49.6917	#N/A	48.2084	46.8962	47.4667	48.6648	41.3622	43.4731	41.9898	42.3321	42.5831	42.9768	43.2449	43.0738	44.0094	41.9898	41.4193	40.8488	40.6206	41.5334	42.5149	47.3526	42.914	#N/A
pyrene	c1cc2ccc3cccc4ccc(c1)c2c34	19.968	50.3935	51.8026	52.9437	#N/A	54.9975	50.7187	49.6917	54.0847	52.4302	53.2289	56.0815	55.1116	#N/A	53.1719	54.1988	55.0546	46.8449	48.3225	47.9232	48.3682	48.9387	49.3837	49.1669	49.92	#N/A	47.9232	47.4667	46.7251	46.611	47.5808	48.2714	53.8565	48.9044	#N/A
pyridine	c1ccncc1	19.6257	17.2409	#N/A	21.5084	#N/A	26.9853	#N/A	#N/A	22.0789	#N/A	#N/A	#N/A	23.7334	#N/A	22.6494	22.4782	#N/A	#N/A	23.8475	22.7635	22.5353	#N/A	#N/A	#N/A	#N/A	#N/A	22.0218	23.5622	23.7334	22.5923	#N/A	17.5149	21.4513	17.2866	#N/A
acetonitrile	CC#N	16.2596	9.92123	15.1757	12.6654	19.6827	18.5417	12.0949	#N/A	#N/A	19.7968	#N/A	17.9712	18.4276	15.6321	16.0314	18.6558	17.9769	16.8872	16.5449	#N/A	14.8334	#N/A	#N/A	#N/A	13.1789	#N/A	#N/A	#N/A	#N/A	#N/A	#N/A	10.0981	#N/A	8.2154	#N/A
propionitrile	CCC#N	16.0885	11.8781	#N/A	15.8032	#N/A	#N/A	#N/A	#N/A	#N/A	#N/A	#N/A	#N/A	20.8238	18.5987	#N/A	#N/A	#N/A	20.5955	#N/A	#N/A	16.7731	#N/A	#N/A	#N/A	15.3468	#N/A	#N/A	#N/A	#N/A	#N/A	#N/A	12.694	#N/A	#N/A	#N/A
1-cyanopropane	CCCC#N	15.2327	14.5367	#N/A	#N/A	#N/A	#N/A	#N/A	#N/A	#N/A	#N/A	#N/A	#N/A	#N/A	#N/A	#N/A	#N/A	#N/A	21.7936	#N/A	#N/A	19.3404	18.7129	18.0796	#N/A	17.8	#N/A	19.2263	19.1122	19.0552	19.5116	#N/A	15.6778	#N/A	#N/A	#N/A
1-cyanobutane	CCCCC#N	14.7193	17.7316	#N/A	#N/A	#N/A	#N/A	#N/A	#N/A	#N/A	#N/A	#N/A	#N/A	#N/A	#N/A	#N/A	#N/A	#N/A	#N/A	#N/A	#N/A	#N/A	#N/A	#N/A	#N/A	20.5385	#N/A	#N/A	#N/A	#N/A	#N/A	#N/A	18.5988	#N/A	#N/A	#N/A
biphenyl	c1ccc(cc1)c1ccccc1	11.125	34.3107	35.9424	38.5667	39.3084	37.768	37.0263	37.8251	#N/A	#N/A	#N/A	#N/A	39.0802	38.7379	#N/A	#N/A	#N/A	32.9757	34.402	34.5161	#N/A	34.8584	34.8584	34.9725	35.0866	#N/A	33.8315	34.2308	33.6033	33.7174	34.1167	35.6573	#N/A	#N/A	#N/A
ammonia	N	18.1994	1.81994	#N/A	4.50706	#N/A	10.0981	#N/A	#N/A	#N/A	#N/A	#N/A	#N/A	#N/A	5.70514	8.4436	8.1013	#N/A	12.8936	11.4673	10.041	10.041	#N/A	#N/A	#N/A	#N/A	#N/A	9.92694	#N/A	10.6116	#N/A	#N/A	#N/A	#N/A	#N/A	#N/A
t-butyl chloride	CC(C)(C)[Cl]	-4.56411	12.9678	14.1487	15.2898	#N/A	#N/A	#N/A	#N/A	#N/A	#N/A	#N/A	14.2628	14.9475	14.8904	#N/A	#N/A	15.2099	#N/A	#N/A	#N/A	12.3801	#N/A	#N/A	#N/A	#N/A	#N/A	11.6955	#N/A	#N/A	12.3231	#N/A	14.32	#N/A	#N/A	#N/A
tetrahydropyran	C1CCOCC1	13.1789	17.2124	#N/A	#N/A	#N/A	24.418	#N/A	#N/A	#N/A	#N/A	#N/A	#N/A	#N/A	#N/A	#N/A	#N/A	#N/A	#N/A	#N/A	#N/A	#N/A	#N/A	#N/A	#N/A	18.3705	#N/A	#N/A	#N/A	#N/A	#N/A	#N/A	#N/A	#N/A	18.4276	#N/A
tetrahydrofuran	C1CCOC1	14.6052	15.0387	#N/A	17.8571	#N/A	22.0218	15.9173	#N/A	#N/A	#N/A	#N/A	17.9141	18.9411	16.9443	17.2295	#N/A	#N/A	18.5417	#N/A	16.5449	#N/A	#N/A	#N/A	#N/A	16.3167	#N/A	16.4878	#N/A	#N/A	#N/A	#N/A	15.4039	#N/A	#N/A	#N/A
tetrahydrothiophene	C1CCSC1	9.47053	17.4634	#N/A	#N/A	#N/A	#N/A	#N/A	#N/A	#N/A	#N/A	#N/A	#N/A	#N/A	#N/A	#N/A	#N/A	#N/A	#N/A	#N/A	#N/A	#N/A	#N/A	#N/A	#N/A	#N/A	#N/A	#N/A	#N/A	#N/A	#N/A	#N/A	#N/A	#N/A	#N/A	#N/A
4-ethylphenol	CCc1ccc(O)cc1	25.6731	27.0252	#N/A	30.5795	35.1436	34.0597	#N/A	#N/A	#N/A	#N/A	#N/A	#N/A	35.2007	33.0898	#N/A	#N/A	#N/A	#N/A	#N/A	#N/A	#N/A	#N/A	#N/A	#N/A	#N/A	#N/A	#N/A	#N/A	#N/A	#N/A	#N/A	27.3277	#N/A	#N/A	18.0853
d-valerolactam	O=C1CCCCN1	39.7648	23.8589	#N/A	#N/A	#N/A	#N/A	#N/A	#N/A	#N/A	#N/A	#N/A	#N/A	#N/A	#N/A	#N/A	#N/A	#N/A	#N/A	#N/A	#N/A	#N/A	#N/A	#N/A	#N/A	#N/A	#N/A	#N/A	#N/A	#N/A	#N/A	#N/A	#N/A	#N/A	#N/A	#N/A
N-methyl-delta-valerolactam	CN1C(=O)CCCC1	28.0122	22.6551	#N/A	#N/A	#N/A	#N/A	#N/A	#N/A	#N/A	#N/A	#N/A	#N/A	#N/A	#N/A	#N/A	#N/A	#N/A	#N/A	#N/A	#N/A	#N/A	#N/A	#N/A	#N/A	#N/A	#N/A	#N/A	#N/A	#N/A	#N/A	#N/A	#N/A	#N/A	#N/A	#N/A
n,n-dimethylacetamide	CN(C)C(C)=O	34.4362	20.761	#N/A	#N/A	#N/A	33.7174	#N/A	#N/A	#N/A	#N/A	#N/A	#N/A	30.2943	#N/A	#N/A	#N/A	#N/A	#N/A	#N/A	#N/A	#N/A	#N/A	#N/A	#N/A	#N/A	#N/A	#N/A	#N/A	#N/A	#N/A	#N/A	#N/A	#N/A	#N/A	#N/A
n-methylpiperidine	CN1CCCCC1	16.2596	18.9981	#N/A	#N/A	#N/A	24.0186	#N/A	#N/A	#N/A	#N/A	#N/A	#N/A	#N/A	#N/A	#N/A	#N/A	#N/A	#N/A	#N/A	#N/A	#N/A	#N/A	#N/A	#N/A	#N/A	#N/A	#N/A	#N/A	#N/A	#N/A	#N/A	#N/A	#N/A	#N/A	#N/A
2-methylpiperidine	CC1CCCCN1	17.9712	18.4276	#N/A	#N/A	#N/A	#N/A	#N/A	#N/A	#N/A	#N/A	#N/A	#N/A	#N/A	#N/A	#N/A	#N/A	#N/A	#N/A	#N/A	#N/A	#N/A	#N/A	#N/A	#N/A	#N/A	#N/A	#N/A	#N/A	#N/A	#N/A	#N/A	#N/A	#N/A	#N/A	#N/A
3-methylpiperidine	CC1CCCNC1	18.0282	18.4447	#N/A	#N/A	#N/A	#N/A	#N/A	#N/A	#N/A	#N/A	#N/A	#N/A	#N/A	#N/A	#N/A	#N/A	#N/A	#N/A	#N/A	#N/A	#N/A	#N/A	#N/A	#N/A	#N/A	#N/A	#N/A	#N/A	#N/A	#N/A	#N/A	#N/A	#N/A	#N/A	#N/A
4-methylpiperidine	CC1CCNCC1	17.9712	18.4219	#N/A	#N/A	#N/A	#N/A	#N/A	#N/A	#N/A	#N/A	#N/A	#N/A	#N/A	#N/A	#N/A	#N/A	#N/A	#N/A	#N/A	#N/A	#N/A	#N/A	#N/A	#N/A	#N/A	#N/A	#N/A	#N/A	#N/A	#N/A	#N/A	#N/A	#N/A	#N/A	#N/A
n-methyl-2-pyrrolidinone	CN1CCCC1=O	32.7475	21.8621	#N/A	#N/A	#N/A	#N/A	#N/A	#N/A	#N/A	#N/A	#N/A	#N/A	#N/A	#N/A	#N/A	#N/A	#N/A	#N/A	#N/A	#N/A	#N/A	#N/A	#N/A	#N/A	#N/A	#N/A	#N/A	#N/A	#N/A	#N/A	#N/A	#N/A	#N/A	#N/A	#N/A
dimethylsulfide	CSC	6.73206	11.6214	#N/A	#N/A	#N/A	#N/A	#N/A	#N/A	#N/A	#N/A	#N/A	#N/A	#N/A	#N/A	#N/A	#N/A	#N/A	#N/A	#N/A	#N/A	#N/A	#N/A	#N/A	#N/A	#N/A	#N/A	#N/A	#N/A	#N/A	#N/A	#N/A	12.4087	#N/A	#N/A	#N/A
diethylsulfide	CCSCC	6.1045	17.2352	#N/A	#N/A	#N/A	26.7571	#N/A	#N/A	#N/A	#N/A	#N/A	#N/A	#N/A	#N/A	#N/A	#N/A	#N/A	#N/A	#N/A	#N/A	#N/A	#N/A	#N/A	#N/A	#N/A	#N/A	#N/A	#N/A	#N/A	#N/A	#N/A	#N/A	#N/A	#N/A	#N/A
dipropylsulfide	CCCSCCC	5.36283	22.8776	#N/A	#N/A	#N/A	#N/A	#N/A	#N/A	#N/A	#N/A	#N/A	#N/A	#N/A	#N/A	#N/A	#N/A	#N/A	#N/A	#N/A	#N/A	#N/A	#N/A	#N/A	#N/A	#N/A	#N/A	#N/A	#N/A	#N/A	#N/A	#N/A	#N/A	#N/A	#N/A	#N/A
diisopropylsulfide	CC(C)SC(C)C	5.07757	20.2247	#N/A	#N/A	#N/A	#N/A	#N/A	#N/A	#N/A	#N/A	#N/A	#N/A	#N/A	#N/A	#N/A	#N/A	#N/A	#N/A	#N/A	#N/A	#N/A	#N/A	#N/A	#N/A	#N/A	#N/A	#N/A	#N/A	#N/A	#N/A	#N/A	#N/A	#N/A	#N/A	#N/A
methylethylsulfide	CSCC	6.27565	13.5326	#N/A	#N/A	#N/A	#N/A	#N/A	#N/A	#N/A	#N/A	#N/A	#N/A	#N/A	#N/A	#N/A	#N/A	#N/A	#N/A	#N/A	#N/A	#N/A	#N/A	#N/A	#N/A	#N/A	#N/A	#N/A	#N/A	#N/A	#N/A	#N/A	#N/A	#N/A	#N/A	#N/A
ethene	C=C	-5.36283	1.64878	#N/A	3.25193	#N/A	#N/A	#N/A	#N/A	#N/A	#N/A	#N/A	3.42308	2.05385	2.56731	3.19488	#N/A	2.28776	2.33911	2.33911	2.16795	1.93975	1.9968	1.81423	1.78	1.59744	#N/A	1.8827	1.82564	1.93975	2.05385	#N/A	2.68713	#N/A	#N/A	#N/A
propene	CC=C	-5.53398	5.39706	#N/A	7.70194	#N/A	#N/A	#N/A	#N/A	#N/A	#N/A	#N/A	#N/A	#N/A	#N/A	#N/A	6.44681	#N/A	5.41988	#N/A	5.64809	5.87629	5.53398	#N/A	#N/A	#N/A	#N/A	5.53398	5.53398	5.41988	5.64809	5.49405	7.33684	#N/A	#N/A	#N/A
but-1-ene	C=CCC	-5.76219	8.72316	#N/A	10.4404	#N/A	#N/A	#N/A	#N/A	#N/A	#N/A	#N/A	#N/A	#N/A	#N/A	#N/A	#N/A	#N/A	#N/A	#N/A	8.38655	8.38655	8.38655	#N/A	#N/A	#N/A	#N/A	8.27245	8.3295	8.27245	8.50065	8.34091	10.4176	#N/A	#N/A	#N/A
pent-1-ene	CCCC=C	-7.01732	11.6784	#N/A	#N/A	#N/A	#N/A	#N/A	#N/A	#N/A	#N/A	#N/A	#N/A	11.9808	12.6084	#N/A	12.0378	11.57	#N/A	#N/A	#N/A	11.068	#N/A	#N/A	#N/A	11.0109	#N/A	#N/A	#N/A	#N/A	#N/A	#N/A	#N/A	#N/A	#N/A	#N/A
hex-1-ene	CCCCC=C	-6.61796	14.6736	#N/A	15.9744	#N/A	#N/A	#N/A	#N/A	#N/A	13.8635	13.9776	#N/A	#N/A	#N/A	#N/A	#N/A	#N/A	#N/A	#N/A	#N/A	13.4641	13.8064	#N/A	#N/A	13.7494	#N/A	#N/A	#N/A	#N/A	#N/A	#N/A	#N/A	#N/A	#N/A	#N/A
hept-1-ene	CCCCCC=C	-6.96027	17.4748	#N/A	#N/A	#N/A	#N/A	#N/A	#N/A	#N/A	15.8603	16.3737	#N/A	#N/A	#N/A	#N/A	#N/A	#N/A	#N/A	#N/A	#N/A	#N/A	16.4308	#N/A	#N/A	#N/A	#N/A	#N/A	#N/A	#N/A	#N/A	#N/A	#N/A	#N/A	#N/A	#N/A
oct-1-ene	CCCCCCC=C	-8.04424	20.3559	#N/A	#N/A	#N/A	#N/A	#N/A	#N/A	#N/A	18.9411	18.884	#N/A	#N/A	#N/A	#N/A	#N/A	#N/A	#N/A	#N/A	#N/A	#N/A	#N/A	#N/A	#N/A	19.1122	#N/A	#N/A	#N/A	#N/A	#N/A	#N/A	#N/A	#N/A	#N/A	#N/A
non-1-ene	CCCCCCCC=C	-8.61476	23.237	#N/A	#N/A	#N/A	#N/A	#N/A	#N/A	#N/A	#N/A	#N/A	#N/A	#N/A	#N/A	#N/A	#N/A	#N/A	#N/A	#N/A	#N/A	#N/A	#N/A	#N/A	#N/A	21.8507	#N/A	#N/A	#N/A	#N/A	#N/A	#N/A	#N/A	#N/A	#N/A	#N/A
dec-1-ene	CCCCCCCCC=C	-9.35643	25.8614	#N/A	#N/A	#N/A	#N/A	#N/A	#N/A	#N/A	#N/A	#N/A	#N/A	#N/A	#N/A	#N/A	#N/A	#N/A	#N/A	#N/A	#N/A	#N/A	#N/A	#N/A	#N/A	#N/A	#N/A	#N/A	#N/A	#N/A	#N/A	#N/A	#N/A	#N/A	#N/A	#N/A
undec-1-ene	CCCCCCCCCC=C	-9.98399	28.6569	#N/A	#N/A	#N/A	#N/A	#N/A	#N/A	#N/A	#N/A	#N/A	#N/A	#N/A	#N/A	#N/A	#N/A	#N/A	#N/A	#N/A	#N/A	#N/A	#N/A	#N/A	#N/A	#N/A	#N/A	#N/A	#N/A	#N/A	#N/A	#N/A	#N/A	#N/A	#N/A	#N/A
dodec-1-ene	CCCCCCCCCCC=C	-10.6686	31.4638	#N/A	#N/A	#N/A	#N/A	#N/A	#N/A	#N/A	#N/A	#N/A	#N/A	#N/A	#N/A	#N/A	#N/A	#N/A	#N/A	#N/A	#N/A	#N/A	#N/A	#N/A	#N/A	#N/A	#N/A	#N/A	#N/A	#N/A	#N/A	#N/A	#N/A	#N/A	#N/A	#N/A
n-methylformamide	CNC=O	37.4828	16.3338	#N/A	#N/A	#N/A	#N/A	#N/A	#N/A	#N/A	#N/A	#N/A	#N/A	#N/A	#N/A	30.7507	#N/A	#N/A	#N/A	#N/A	#N/A	#N/A	#N/A	#N/A	#N/A	#N/A	#N/A	#N/A	#N/A	#N/A	#N/A	#N/A	#N/A	#N/A	#N/A	#N/A
n,n-dimethylformamide	CN(C)C=O	32.6904	18.1024	#N/A	#N/A	#N/A	#N/A	#N/A	#N/A	#N/A	#N/A	#N/A	25.0456	#N/A	#N/A	26.8712	26.8141	#N/A	#N/A	#N/A	#N/A	#N/A	#N/A	#N/A	#N/A	24.9885	#N/A	#N/A	#N/A	#N/A	#N/A	#N/A	#N/A	#N/A	#N/A	#N/A
n,n-dibutylformamide	CCCCN(C=O)CCCC	24.7603	32.0515	#N/A	#N/A	#N/A	#N/A	#N/A	#N/A	#N/A	#N/A	#N/A	#N/A	#N/A	#N/A	#N/A	#N/A	#N/A	#N/A	#N/A	#N/A	#N/A	#N/A	#N/A	#N/A	#N/A	#N/A	#N/A	#N/A	#N/A	#N/A	#N/A	#N/A	#N/A	#N/A	#N/A
n-methylacetamide	CNC(C)=O	39.2513	16.9671	#N/A	#N/A	#N/A	#N/A	#N/A	#N/A	#N/A	#N/A	#N/A	#N/A	#N/A	#N/A	#N/A	#N/A	#N/A	#N/A	#N/A	#N/A	#N/A	#N/A	#N/A	#N/A	#N/A	#N/A	#N/A	#N/A	#N/A	#N/A	#N/A	#N/A	#N/A	#N/A	#N/A
n-ethylacetamide	CCNC(C)=O	38.3385	21.9305	#N/A	#N/A	#N/A	#N/A	#N/A	#N/A	#N/A	#N/A	#N/A	#N/A	#N/A	#N/A	#N/A	#N/A	#N/A	#N/A	#N/A	#N/A	#N/A	#N/A	#N/A	#N/A	#N/A	#N/A	#N/A	#N/A	#N/A	#N/A	#N/A	#N/A	#N/A	#N/A	#N/A
n-butylacetamide	CCCCNC(C)=O	37.4828	26.1409	#N/A	#N/A	#N/A	#N/A	#N/A	#N/A	#N/A	#N/A	#N/A	#N/A	#N/A	#N/A	#N/A	#N/A	#N/A	#N/A	#N/A	#N/A	#N/A	#N/A	#N/A	#N/A	#N/A	#N/A	#N/A	#N/A	#N/A	#N/A	#N/A	#N/A	#N/A	#N/A	#N/A
methylethylether	CCOC	8.78591	9.08258	#N/A	#N/A	#N/A	#N/A	#N/A	#N/A	#N/A	#N/A	#N/A	#N/A	#N/A	#N/A	#N/A	#N/A	#N/A	#N/A	#N/A	#N/A	#N/A	#N/A	#N/A	#N/A	#N/A	#N/A	#N/A	#N/A	#N/A	#N/A	#N/A	#N/A	#N/A	#N/A	#N/A
methylcyclohexylether	COC1CCCCC1	13.8635	22.0275	#N/A	#N/A	#N/A	#N/A	#N/A	#N/A	#N/A	#N/A	#N/A	#N/A	#N/A	#N/A	#N/A	#N/A	#N/A	#N/A	#N/A	#N/A	#N/A	#N/A	#N/A	#N/A	#N/A	#N/A	#N/A	#N/A	#N/A	#N/A	#N/A	#N/A	#N/A	#N/A	#N/A
undecan-1-ol	CCCCCCCCCCCO	14.2628	34.9611	#N/A	#N/A	#N/A	#N/A	#N/A	#N/A	#N/A	#N/A	#N/A	#N/A	#N/A	#N/A	#N/A	#N/A	#N/A	#N/A	#N/A	#N/A	#N/A	#N/A	#N/A	#N/A	#N/A	42.9597	#N/A	#N/A	#N/A	#N/A	#N/A	#N/A	#N/A	#N/A	#N/A
dodecan-1-ol	CCCCCCCCCCCCO	13.9205	37.768	#N/A	#N/A	#N/A	#N/A	#N/A	#N/A	#N/A	#N/A	#N/A	#N/A	#N/A	#N/A	#N/A	#N/A	#N/A	#N/A	#N/A	#N/A	#N/A	#N/A	#N/A	#N/A	#N/A	#N/A	#N/A	#N/A	#N/A	#N/A	#N/A	38.7381	#N/A	#N/A	#N/A
tridecan-1-ol	CCCCCCCCCCCCCO	13.5782	40.7176	#N/A	#N/A	#N/A	#N/A	#N/A	#N/A	#N/A	#N/A	#N/A	#N/A	#N/A	#N/A	#N/A	#N/A	#N/A	#N/A	#N/A	#N/A	#N/A	#N/A	#N/A	#N/A	#N/A	#N/A	#N/A	#N/A	#N/A	#N/A	#N/A	#N/A	#N/A	#N/A	#N/A
tetradecan-1-ol	CCCCCCCCCCCCCCO	12.8936	43.5644	#N/A	#N/A	#N/A	#N/A	#N/A	#N/A	#N/A	#N/A	#N/A	#N/A	#N/A	#N/A	#N/A	#N/A	#N/A	#N/A	#N/A	#N/A	#N/A	#N/A	51.0039	#N/A	#N/A	50.6616	51.6315	#N/A	#N/A	#N/A	#N/A	#N/A	#N/A	#N/A	#N/A
pentadecan-1-ol	CCCCCCCCCCCCCCCO	12.209	46.474	#N/A	#N/A	#N/A	#N/A	51.7456	#N/A	#N/A	#N/A	#N/A	#N/A	#N/A	#N/A	#N/A	#N/A	#N/A	#N/A	#N/A	#N/A	#N/A	#N/A	#N/A	#N/A	#N/A	#N/A	#N/A	#N/A	#N/A	#N/A	#N/A	#N/A	#N/A	#N/A	#N/A
hexadecan-1-ol	CCCCCCCCCCCCCCCCO	11.5244	49.3723	56.5379	#N/A	#N/A	#N/A	54.9405	#N/A	#N/A	#N/A	#N/A	#N/A	#N/A	#N/A	#N/A	#N/A	#N/A	#N/A	#N/A	#N/A	#N/A	#N/A	56.7091	#N/A	56.4809	56.2527	57.3366	#N/A	#N/A	#N/A	#N/A	#N/A	#N/A	#N/A	#N/A
heptadecan-1-ol	CCCCCCCCCCCCCCCCCO	10.8398	52.2819	#N/A	#N/A	#N/A	#N/A	#N/A	#N/A	#N/A	#N/A	#N/A	#N/A	#N/A	#N/A	#N/A	#N/A	#N/A	#N/A	#N/A	#N/A	#N/A	#N/A	#N/A	#N/A	#N/A	#N/A	#N/A	#N/A	#N/A	#N/A	#N/A	#N/A	#N/A	#N/A	#N/A
octadecan-1-ol	CCCCCCCCCCCCCCCCCCO	10.1551	55.123	62.6424	#N/A	#N/A	#N/A	60.6456	#N/A	#N/A	#N/A	#N/A	#N/A	#N/A	#N/A	#N/A	#N/A	#N/A	#N/A	#N/A	#N/A	#N/A	#N/A	62.4142	#N/A	62.3572	62.186	62.186	#N/A	#N/A	#N/A	#N/A	#N/A	#N/A	#N/A	#N/A
nonadecan-1-ol	CCCCCCCCCCCCCCCCCCCO	9.47053	57.9813	#N/A	#N/A	#N/A	#N/A	#N/A	#N/A	#N/A	#N/A	#N/A	#N/A	#N/A	#N/A	#N/A	#N/A	#N/A	#N/A	#N/A	#N/A	#N/A	#N/A	#N/A	#N/A	#N/A	#N/A	#N/A	#N/A	#N/A	#N/A	#N/A	#N/A	#N/A	#N/A	#N/A
eicosan-1-ol	CCCCCCCCCCCCCCCCCCCCO	8.78591	60.8567	#N/A	#N/A	#N/A	#N/A	#N/A	#N/A	#N/A	#N/A	#N/A	#N/A	#N/A	#N/A	#N/A	#N/A	#N/A	#N/A	#N/A	#N/A	#N/A	#N/A	68.9181	#N/A	68.804	68.5187	67.8341	#N/A	#N/A	#N/A	#N/A	#N/A	#N/A	#N/A	#N/A
adamantan-1-ol	OC12CC3CC(C1)CC(C2)C3	29.3815	32.1427	#N/A	#N/A	#N/A	#N/A	#N/A	#N/A	#N/A	#N/A	#N/A	#N/A	#N/A	#N/A	#N/A	#N/A	#N/A	#N/A	#N/A	#N/A	#N/A	#N/A	#N/A	#N/A	#N/A	#N/A	#N/A	#N/A	#N/A	#N/A	#N/A	#N/A	#N/A	#N/A	#N/A
propan-2-ol	CC(C)O	19.8539	10.0639	#N/A	12.0949	#N/A	17.8571	#N/A	#N/A	14.5481	#N/A	18.4846	19.6257	#N/A	#N/A	#N/A	18.9981	#N/A	#N/A	22.0218	20.9379	20.9949	20.8808	#N/A	#N/A	19.2834	18.7699	20.8238	#N/A	#N/A	20.9949	#N/A	11.5244	#N/A	9.92694	#N/A
butan-2-ol	CCC(C)O	19.3404	13.3386	#N/A	16.2596	#N/A	21.052	#N/A	#N/A	#N/A	#N/A	#N/A	#N/A	#N/A	17.8	#N/A	21.6795	#N/A	#N/A	#N/A	#N/A	22.9917	#N/A	#N/A	#N/A	21.6795	22.2272	#N/A	23.334	#N/A	23.7334	#N/A	14.8734	#N/A	#N/A	#N/A
pentan-2-ol	CCCC(C)O	18.3705	16.2026	#N/A	19.6827	#N/A	#N/A	#N/A	#N/A	#N/A	#N/A	#N/A	#N/A	22.8205	#N/A	#N/A	#N/A	#N/A	#N/A	#N/A	#N/A	#N/A	#N/A	#N/A	#N/A	#N/A	#N/A	#N/A	#N/A	#N/A	#N/A	#N/A	#N/A	#N/A	#N/A	#N/A
2-methylbutan-2-ol	CCC(C)(C)O	18.9411	15.5294	#N/A	18.2564	#N/A	21.3372	#N/A	#N/A	#N/A	#N/A	#N/A	#N/A	#N/A	#N/A	#N/A	#N/A	#N/A	#N/A	#N/A	#N/A	#N/A	#N/A	#N/A	#N/A	#N/A	#N/A	#N/A	#N/A	#N/A	#N/A	#N/A	#N/A	#N/A	#N/A	#N/A
2-methylpropan-2-ol	CC(C)(C)O	18.7129	11.1992	#N/A	14.7193	#N/A	18.7699	#N/A	#N/A	15.4609	#N/A	19.2263	#N/A	#N/A	#N/A	#N/A	19.6827	#N/A	#N/A	#N/A	#N/A	21.4513	#N/A	#N/A	#N/A	19.968	#N/A	#N/A	#N/A	21.5084	20.9949	#N/A	#N/A	#N/A	12.266	#N/A
2-methylpentan-2-ol	CCCC(C)(C)O	18.5417	18.4846	#N/A	#N/A	#N/A	#N/A	#N/A	#N/A	#N/A	#N/A	#N/A	#N/A	#N/A	#N/A	#N/A	#N/A	#N/A	#N/A	#N/A	#N/A	#N/A	#N/A	#N/A	#N/A	#N/A	#N/A	#N/A	#N/A	#N/A	#N/A	#N/A	#N/A	#N/A	#N/A	#N/A
2-methylhexan-2-ol	CCCCC(C)(C)O	17.4577	21.0291	#N/A	#N/A	#N/A	#N/A	#N/A	#N/A	#N/A	#N/A	#N/A	#N/A	#N/A	#N/A	#N/A	#N/A	#N/A	#N/A	#N/A	#N/A	#N/A	#N/A	#N/A	#N/A	#N/A	#N/A	#N/A	#N/A	#N/A	#N/A	#N/A	#N/A	#N/A	#N/A	#N/A
cyclopentanol	OC1CCCC1	22.9917	18.4904	#N/A	#N/A	#N/A	#N/A	#N/A	#N/A	#N/A	#N/A	#N/A	#N/A	#N/A	#N/A	26.2436	#N/A	#N/A	#N/A	#N/A	#N/A	#N/A	#N/A	#N/A	#N/A	#N/A	#N/A	#N/A	#N/A	#N/A	#N/A	#N/A	#N/A	#N/A	#N/A	#N/A
cyclohexanol	OC1CCCCC1	22.8776	21.4399	#N/A	#N/A	#N/A	29.2674	#N/A	#N/A	#N/A	#N/A	#N/A	#N/A	#N/A	#N/A	29.0391	#N/A	#N/A	#N/A	#N/A	#N/A	#N/A	#N/A	#N/A	#N/A	29.5526	31.3041	#N/A	#N/A	#N/A	#N/A	#N/A	#N/A	#N/A	#N/A	#N/A
cycloheptanol	OC1CCCCCC1	22.9347	25.1425	#N/A	#N/A	#N/A	#N/A	#N/A	#N/A	#N/A	#N/A	#N/A	#N/A	#N/A	#N/A	#N/A	#N/A	#N/A	#N/A	#N/A	#N/A	#N/A	#N/A	#N/A	#N/A	#N/A	#N/A	#N/A	#N/A	#N/A	#N/A	#N/A	#N/A	#N/A	#N/A	#N/A
cyclooctanol	OC1CCCCCCC1	21.7366	28.8338	#N/A	#N/A	#N/A	#N/A	#N/A	#N/A	#N/A	#N/A	#N/A	#N/A	#N/A	#N/A	#N/A	#N/A	#N/A	#N/A	#N/A	#N/A	#N/A	#N/A	#N/A	#N/A	#N/A	#N/A	#N/A	#N/A	#N/A	#N/A	#N/A	#N/A	#N/A	#N/A	#N/A
adamantane	C1C2CC3CC1CC(C2)C3	0.684616	28.1491	#N/A	#N/A	#N/A	#N/A	#N/A	#N/A	#N/A	#N/A	#N/A	#N/A	#N/A	#N/A	#N/A	#N/A	#N/A	#N/A	#N/A	#N/A	#N/A	#N/A	#N/A	#N/A	#N/A	#N/A	#N/A	#N/A	#N/A	#N/A	#N/A	#N/A	#N/A	#N/A	#N/A
cyclohexylmethylketone	CC(=O)C1CCCCC1	18.7129	26.3577	#N/A	#N/A	#N/A	#N/A	#N/A	#N/A	#N/A	#N/A	#N/A	#N/A	#N/A	#N/A	#N/A	#N/A	#N/A	#N/A	#N/A	#N/A	#N/A	#N/A	#N/A	#N/A	#N/A	#N/A	#N/A	#N/A	#N/A	#N/A	#N/A	#N/A	#N/A	#N/A	#N/A
2-methylcyclohexanone	CC1CCCCC1=O	17.5148	23.1343	#N/A	#N/A	#N/A	#N/A	#N/A	#N/A	#N/A	#N/A	#N/A	#N/A	#N/A	#N/A	#N/A	#N/A	#N/A	#N/A	#N/A	#N/A	#N/A	#N/A	#N/A	#N/A	#N/A	#N/A	#N/A	#N/A	#N/A	#N/A	#N/A	#N/A	#N/A	#N/A	#N/A
cyclopropane	C1CC1	-3.13783	7.49655	#N/A	#N/A	#N/A	#N/A	#N/A	#N/A	#N/A	#N/A	#N/A	#N/A	#N/A	#N/A	#N/A	#N/A	#N/A	#N/A	#N/A	6.56091	7.18847	#N/A	#N/A	#N/A	#N/A	#N/A	6.61796	#N/A	#N/A	#N/A	#N/A	8.27249	#N/A	#N/A	5.06616
propylcyclopentane	CCCC1CCCC1	-8.90001	21.6966	#N/A	#N/A	#N/A	#N/A	#N/A	#N/A	#N/A	#N/A	#N/A	#N/A	#N/A	#N/A	#N/A	#N/A	#N/A	#N/A	#N/A	#N/A	#N/A	#N/A	#N/A	#N/A	#N/A	#N/A	#N/A	#N/A	#N/A	#N/A	#N/A	#N/A	#N/A	#N/A	#N/A
pentylcyclopentane	CCCCCC1CCCC1	-10.6686	26.2436	#N/A	#N/A	#N/A	#N/A	#N/A	#N/A	#N/A	#N/A	#N/A	#N/A	#N/A	#N/A	#N/A	#N/A	#N/A	#N/A	#N/A	#N/A	#N/A	#N/A	#N/A	#N/A	#N/A	#N/A	#N/A	#N/A	#N/A	#N/A	#N/A	#N/A	#N/A	#N/A	#N/A
propylcyclohexane	CCCC1CCCCC1	-7.53078	24.6063	#N/A	#N/A	#N/A	#N/A	#N/A	#N/A	#N/A	#N/A	#N/A	#N/A	#N/A	#N/A	#N/A	#N/A	#N/A	#N/A	#N/A	#N/A	#N/A	#N/A	#N/A	#N/A	#N/A	#N/A	#N/A	#N/A	#N/A	#N/A	#N/A	#N/A	#N/A	#N/A	#N/A
butylcyclohexane	CCCCC1CCCCC1	-8.2154	27.4189	#N/A	#N/A	#N/A	#N/A	#N/A	#N/A	#N/A	#N/A	#N/A	#N/A	#N/A	#N/A	#N/A	#N/A	#N/A	#N/A	#N/A	#N/A	#N/A	#N/A	#N/A	#N/A	#N/A	#N/A	#N/A	#N/A	#N/A	#N/A	#N/A	#N/A	#N/A	#N/A	#N/A
t-butylcyclohexane	CC(C)(C)C1CCCCC1	-7.30258	26.2607	#N/A	#N/A	#N/A	#N/A	#N/A	#N/A	#N/A	#N/A	#N/A	#N/A	#N/A	#N/A	#N/A	#N/A	#N/A	#N/A	#N/A	#N/A	#N/A	#N/A	#N/A	#N/A	#N/A	#N/A	#N/A	#N/A	#N/A	#N/A	#N/A	#N/A	#N/A	#N/A	#N/A
2-methylpyridine	Cc1ccccn1	19.3975	19.523	#N/A	#N/A	#N/A	29.2103	#N/A	#N/A	24.5321	#N/A	#N/A	#N/A	#N/A	#N/A	#N/A	#N/A	#N/A	#N/A	#N/A	#N/A	#N/A	#N/A	#N/A	#N/A	#N/A	#N/A	24.5891	25.1026	25.9013	24.7032	#N/A	#N/A	#N/A	21.109	#N/A
3-methylpyridine	Cc1cccnc1	19.968	20.7154	#N/A	#N/A	#N/A	30.7507	#N/A	#N/A	#N/A	#N/A	#N/A	#N/A	#N/A	#N/A	#N/A	#N/A	#N/A	#N/A	#N/A	26.5289	26.8141	#N/A	#N/A	#N/A	#N/A	#N/A	#N/A	#N/A	#N/A	24.3609	#N/A	#N/A	#N/A	21.5084	#N/A
4-methylpyridine	Cc1ccncc1	20.6526	20.7667	#N/A	25.4449	#N/A	#N/A	#N/A	#N/A	#N/A	#N/A	#N/A	#N/A	#N/A	#N/A	#N/A	#N/A	#N/A	#N/A	#N/A	#N/A	#N/A	#N/A	#N/A	#N/A	#N/A	#N/A	#N/A	#N/A	#N/A	#N/A	#N/A	#N/A	#N/A	#N/A	#N/A
2,3-dimethylpyridine	Cc1cccnc1C	20.1962	23.0773	#N/A	#N/A	#N/A	#N/A	#N/A	#N/A	#N/A	#N/A	#N/A	#N/A	#N/A	#N/A	#N/A	#N/A	#N/A	#N/A	#N/A	#N/A	#N/A	#N/A	#N/A	#N/A	#N/A	#N/A	#N/A	#N/A	#N/A	#N/A	#N/A	#N/A	#N/A	#N/A	#N/A
2,4-dimethylpyridine	Cc1ccnc(C)c1	20.3673	22.8548	#N/A	#N/A	#N/A	#N/A	#N/A	#N/A	#N/A	#N/A	#N/A	#N/A	#N/A	#N/A	#N/A	#N/A	#N/A	#N/A	#N/A	#N/A	#N/A	#N/A	#N/A	#N/A	#N/A	#N/A	#N/A	#N/A	#N/A	#N/A	#N/A	#N/A	#N/A	#N/A	#N/A
2,5-dimethylpyridine	Cc1ccc(C)nc1	19.7398	22.7407	#N/A	#N/A	#N/A	#N/A	#N/A	#N/A	#N/A	#N/A	#N/A	#N/A	#N/A	#N/A	#N/A	#N/A	#N/A	#N/A	#N/A	#N/A	#N/A	#N/A	#N/A	#N/A	#N/A	#N/A	#N/A	#N/A	#N/A	#N/A	#N/A	#N/A	#N/A	#N/A	#N/A
2,6-dimethylpyridine	Cc1cccc(C)n1	19.2263	21.4513	#N/A	#N/A	#N/A	32.4052	#N/A	#N/A	26.7571	#N/A	#N/A	#N/A	#N/A	#N/A	#N/A	#N/A	#N/A	#N/A	#N/A	#N/A	#N/A	#N/A	#N/A	#N/A	#N/A	#N/A	#N/A	#N/A	#N/A	#N/A	#N/A	#N/A	#N/A	23.0488	#N/A
3,4-dimethylpyridine	Cc1cnccc1C	21.8507	24.6291	#N/A	#N/A	#N/A	#N/A	#N/A	#N/A	#N/A	#N/A	#N/A	#N/A	#N/A	#N/A	#N/A	#N/A	#N/A	#N/A	#N/A	#N/A	#N/A	#N/A	#N/A	#N/A	#N/A	#N/A	#N/A	#N/A	#N/A	#N/A	#N/A	#N/A	#N/A	#N/A	#N/A
3,5-dimethylpyridine	Cc1cncc(C)c1	20.2532	24.0414	#N/A	#N/A	#N/A	#N/A	#N/A	#N/A	#N/A	#N/A	#N/A	#N/A	#N/A	#N/A	#N/A	#N/A	#N/A	#N/A	#N/A	#N/A	#N/A	#N/A	#N/A	#N/A	#N/A	#N/A	#N/A	#N/A	#N/A	#N/A	#N/A	#N/A	#N/A	#N/A	#N/A
quinoline	c1ccc2ncccc2c1	23.9616	31.1329	#N/A	#N/A	#N/A	39.8219	#N/A	#N/A	#N/A	#N/A	#N/A	#N/A	#N/A	#N/A	#N/A	#N/A	#N/A	#N/A	#N/A	#N/A	#N/A	#N/A	#N/A	#N/A	#N/A	#N/A	#N/A	#N/A	#N/A	#N/A	#N/A	#N/A	#N/A	#N/A	#N/A
isoquinoline	c1ccc2cnccc2c1	22.3641	31.9202	#N/A	#N/A	#N/A	39.3654	#N/A	#N/A	#N/A	#N/A	#N/A	#N/A	#N/A	#N/A	#N/A	#N/A	#N/A	#N/A	#N/A	#N/A	#N/A	#N/A	#N/A	#N/A	#N/A	#N/A	#N/A	#N/A	#N/A	#N/A	#N/A	#N/A	#N/A	#N/A	#N/A
propylbenzene	CCCc1ccccc1	2.225	24.1327	#N/A	#N/A	#N/A	#N/A	#N/A	#N/A	#N/A	#N/A	#N/A	27.784	#N/A	#N/A	#N/A	#N/A	#N/A	22.3071	#N/A	#N/A	#N/A	#N/A	#N/A	#N/A	23.334	#N/A	22.4212	#N/A	#N/A	#N/A	#N/A	23.2257	#N/A	#N/A	#N/A
butylbenzene	CCCCc1ccccc1	1.65449	26.9853	#N/A	#N/A	#N/A	#N/A	#N/A	#N/A	#N/A	#N/A	#N/A	30.6936	#N/A	#N/A	#N/A	#N/A	#N/A	24.418	23.9616	#N/A	#N/A	#N/A	#N/A	#N/A	#N/A	#N/A	24.8173	#N/A	#N/A	#N/A	#N/A	#N/A	#N/A	#N/A	#N/A
pentylbenzene	CCCCCc1ccccc1	0.969873	29.8379	#N/A	#N/A	#N/A	#N/A	#N/A	#N/A	#N/A	#N/A	#N/A	#N/A	#N/A	#N/A	#N/A	#N/A	#N/A	#N/A	#N/A	#N/A	#N/A	#N/A	#N/A	#N/A	#N/A	#N/A	#N/A	#N/A	#N/A	#N/A	#N/A	#N/A	#N/A	#N/A	#N/A
hexylbenzene	CCCCCCc1ccccc1	0.171154	32.6334	#N/A	#N/A	#N/A	#N/A	#N/A	#N/A	#N/A	#N/A	#N/A	#N/A	#N/A	#N/A	#N/A	#N/A	#N/A	29.8379	#N/A	#N/A	#N/A	#N/A	#N/A	#N/A	#N/A	#N/A	#N/A	#N/A	#N/A	#N/A	#N/A	#N/A	#N/A	#N/A	#N/A
isopropylbenzene	CC(C)c1ccccc1	1.25513	23.2998	#N/A	#N/A	#N/A	#N/A	#N/A	#N/A	#N/A	#N/A	#N/A	27.2135	#N/A	#N/A	24.6462	#N/A	#N/A	21.6795	#N/A	#N/A	#N/A	#N/A	#N/A	#N/A	22.7064	#N/A	21.6225	#N/A	#N/A	#N/A	#N/A	#N/A	#N/A	#N/A	#N/A
tert-butylbenzene	CC(C)(C)c1ccccc1	1.82564	25.1768	#N/A	#N/A	#N/A	#N/A	#N/A	#N/A	#N/A	#N/A	#N/A	29.0391	#N/A	#N/A	#N/A	#N/A	#N/A	23.1058	#N/A	#N/A	#N/A	#N/A	#N/A	#N/A	#N/A	#N/A	23.3911	#N/A	#N/A	#N/A	#N/A	#N/A	#N/A	#N/A	#N/A
1,3-dichlorobenzene	[Cl]c1cccc([Cl])c1	4.1077	25.1597	#N/A	25.9584	#N/A	26.1866	#N/A	#N/A	#N/A	#N/A	#N/A	#N/A	#N/A	#N/A	#N/A	#N/A	#N/A	#N/A	#N/A	#N/A	#N/A	#N/A	#N/A	#N/A	23.5622	#N/A	#N/A	#N/A	#N/A	#N/A	#N/A	25.8444	#N/A	#N/A	#N/A
1,4-dichlorobenzene	[Cl]c1ccc([Cl])cc1	4.2218	25.3023	#N/A	26.2436	#N/A	26.4148	#N/A	#N/A	#N/A	#N/A	#N/A	#N/A	#N/A	#N/A	#N/A	#N/A	#N/A	#N/A	#N/A	#N/A	#N/A	#N/A	#N/A	#N/A	25.4449	#N/A	#N/A	#N/A	#N/A	#N/A	#N/A	25.3309	#N/A	24.2659	#N/A
fluoranthene	c1ccc2c(c1)c3cccc4cccc2c34	19.6257	50.3592	51.8426	52.8866	#N/A	54.5411	50.4848	49.92	53.9706	#N/A	#N/A	#N/A	54.3129	#N/A	#N/A	#N/A	#N/A	46.6908	47.5409	47.4496	47.9289	48.4423	48.8816	49.7773	49.1212	#N/A	46.5425	47.0674	46.2116	#N/A	47.0674	48.0318	53.5142	48.5507	#N/A
coronene	c1cc2ccc3ccc4ccc5ccc6ccc1c7c2c3c4c5c67	41.4193	78.7879	#N/A	#N/A	#N/A	#N/A	#N/A	#N/A	#N/A	#N/A	#N/A	#N/A	#N/A	#N/A	#N/A	#N/A	#N/A	#N/A	#N/A	#N/A	#N/A	#N/A	#N/A	#N/A	#N/A	#N/A	#N/A	#N/A	#N/A	#N/A	#N/A	#N/A	#N/A	#N/A	#N/A
acenaphthene	C1Cc2cccc3cccc1c23	13.1789	36.9065	39.1943	40.2783	#N/A	41.134	38.3956	36.9693	#N/A	38.852	39.4796	41.2481	40.9058	#N/A	#N/A	#N/A	#N/A	34.3449	35.1094	35.6571	35.9766	36.2961	36.4786	36.587	35.9994	36.7981	35.0295	35.3719	35.1436	35.0866	35.2577	37.055	#N/A	37.3801	#N/A
fluorene	C1c2ccccc2c2ccccc12	13.9776	39.491	#N/A	#N/A	#N/A	#N/A	#N/A	40.6206	#N/A	#N/A	#N/A	#N/A	#N/A	#N/A	#N/A	#N/A	#N/A	37.0092	37.3515	37.9962	38.2758	38.6295	38.7436	39.0345	38.9661	39.0288	37.3116	37.4257	38.5097	36.9693	37.4257	38.8636	#N/A	#N/A	#N/A
indane	C1Cc2ccccc2C1	6.1045	26.1866	#N/A	#N/A	#N/A	#N/A	#N/A	#N/A	#N/A	#N/A	#N/A	#N/A	#N/A	#N/A	#N/A	#N/A	#N/A	#N/A	#N/A	#N/A	#N/A	#N/A	#N/A	#N/A	#N/A	#N/A	#N/A	#N/A	#N/A	#N/A	#N/A	#N/A	#N/A	#N/A	#N/A
fluoroethane	CCF	-1.71154	4.28456	#N/A	#N/A	#N/A	#N/A	#N/A	#N/A	#N/A	#N/A	#N/A	7.47373	#N/A	#N/A	#N/A	#N/A	#N/A	#N/A	#N/A	#N/A	#N/A	#N/A	#N/A	#N/A	#N/A	#N/A	#N/A	#N/A	#N/A	#N/A	#N/A	#N/A	#N/A	#N/A	#N/A
1-fluoropropane	CCCF	-1.36923	7.13713	#N/A	#N/A	#N/A	#N/A	#N/A	#N/A	#N/A	#N/A	#N/A	#N/A	#N/A	#N/A	#N/A	#N/A	#N/A	#N/A	#N/A	#N/A	#N/A	#N/A	#N/A	#N/A	#N/A	#N/A	#N/A	#N/A	#N/A	#N/A	#N/A	#N/A	#N/A	#N/A	#N/A
2-fluoropropane	CC(C)F	-2.07667	6.56091	#N/A	#N/A	#N/A	#N/A	#N/A	#N/A	#N/A	#N/A	#N/A	#N/A	#N/A	#N/A	#N/A	#N/A	#N/A	#N/A	#N/A	#N/A	#N/A	#N/A	#N/A	#N/A	#N/A	#N/A	#N/A	#N/A	#N/A	#N/A	#N/A	#N/A	#N/A	#N/A	#N/A
1-fluorobutane	CCCCF	-1.65449	10.1152	#N/A	#N/A	#N/A	#N/A	#N/A	#N/A	#N/A	#N/A	#N/A	#N/A	#N/A	#N/A	#N/A	#N/A	#N/A	#N/A	#N/A	#N/A	#N/A	#N/A	#N/A	#N/A	#N/A	#N/A	#N/A	#N/A	#N/A	#N/A	#N/A	#N/A	#N/A	#N/A	#N/A
1-fluoropentane	CCCCCF	-1.19808	13.9205	#N/A	#N/A	#N/A	#N/A	#N/A	#N/A	#N/A	#N/A	#N/A	#N/A	#N/A	#N/A	#N/A	#N/A	#N/A	#N/A	#N/A	#N/A	#N/A	#N/A	#N/A	#N/A	#N/A	#N/A	#N/A	#N/A	#N/A	#N/A	#N/A	#N/A	#N/A	#N/A	#N/A
fluorobenzene	Fc1ccccc1	3.36603	15.9059	#N/A	15.2327	#N/A	19.6257	#N/A	#N/A	#N/A	#N/A	#N/A	20.6526	#N/A	#N/A	#N/A	#N/A	#N/A	#N/A	#N/A	#N/A	#N/A	#N/A	#N/A	#N/A	#N/A	#N/A	#N/A	#N/A	#N/A	#N/A	#N/A	17.3551	#N/A	16.06	#N/A
1,2-difluorobenzene	Fc1ccccc1F	2.68141	16.2197	#N/A	#N/A	#N/A	#N/A	#N/A	#N/A	#N/A	#N/A	#N/A	#N/A	#N/A	#N/A	#N/A	#N/A	#N/A	#N/A	#N/A	#N/A	#N/A	#N/A	#N/A	#N/A	#N/A	#N/A	#N/A	#N/A	#N/A	#N/A	#N/A	#N/A	#N/A	#N/A	#N/A
o-fluorochlorobenzene	Fc1ccccc1[Cl]	4.1077	20.7838	#N/A	#N/A	#N/A	#N/A	#N/A	#N/A	#N/A	#N/A	#N/A	#N/A	#N/A	#N/A	#N/A	#N/A	#N/A	#N/A	#N/A	#N/A	#N/A	#N/A	#N/A	#N/A	#N/A	#N/A	#N/A	#N/A	#N/A	#N/A	#N/A	#N/A	#N/A	#N/A	#N/A
m-fluorochlorobenzene	Fc1cccc([Cl])c1	3.70834	20.162	#N/A	#N/A	#N/A	#N/A	#N/A	#N/A	#N/A	#N/A	#N/A	#N/A	#N/A	#N/A	#N/A	#N/A	#N/A	#N/A	#N/A	#N/A	#N/A	#N/A	#N/A	#N/A	#N/A	#N/A	#N/A	#N/A	#N/A	#N/A	#N/A	#N/A	#N/A	#N/A	#N/A
p-fluorochlorobenzene	Fc1ccc([Cl])cc1	3.59424	20.2818	#N/A	#N/A	#N/A	#N/A	#N/A	#N/A	#N/A	#N/A	#N/A	#N/A	#N/A	#N/A	#N/A	#N/A	#N/A	#N/A	#N/A	#N/A	#N/A	#N/A	#N/A	#N/A	#N/A	#N/A	#N/A	#N/A	#N/A	#N/A	#N/A	#N/A	#N/A	#N/A	#N/A
3-fluorophenol	Oc1cccc(F)c1	26.1295	21.9191	#N/A	#N/A	#N/A	#N/A	#N/A	#N/A	#N/A	#N/A	#N/A	#N/A	#N/A	#N/A	#N/A	#N/A	#N/A	#N/A	#N/A	#N/A	#N/A	#N/A	#N/A	#N/A	#N/A	#N/A	#N/A	#N/A	#N/A	#N/A	#N/A	#N/A	#N/A	#N/A	#N/A
4-fluorophenol	Oc1ccc(F)cc1	25.9013	21.9305	#N/A	24.418	#N/A	#N/A	#N/A	#N/A	#N/A	#N/A	#N/A	#N/A	29.952	#N/A	#N/A	#N/A	#N/A	#N/A	#N/A	#N/A	#N/A	#N/A	#N/A	#N/A	#N/A	#N/A	#N/A	#N/A	#N/A	#N/A	#N/A	#N/A	#N/A	#N/A	#N/A
cis-but-2-ene	CC=CC	-5.64809	9.90982	#N/A	#N/A	#N/A	#N/A	#N/A	#N/A	#N/A	#N/A	#N/A	#N/A	#N/A	#N/A	#N/A	#N/A	#N/A	#N/A	#N/A	#N/A	#N/A	#N/A	#N/A	#N/A	#N/A	#N/A	#N/A	#N/A	#N/A	#N/A	#N/A	#N/A	#N/A	#N/A	#N/A
trans-but-2-ene	CC=CC	-5.59103	9.49335	#N/A	#N/A	#N/A	#N/A	#N/A	#N/A	#N/A	#N/A	#N/A	#N/A	#N/A	#N/A	10.3263	#N/A	#N/A	#N/A	#N/A	#N/A	#N/A	#N/A	#N/A	#N/A	#N/A	#N/A	#N/A	#N/A	#N/A	#N/A	#N/A	#N/A	#N/A	#N/A	#N/A
2-methylbut-2-ene	CC=C(C)C	-5.47693	12.7168	#N/A	13.5782	#N/A	#N/A	#N/A	#N/A	#N/A	#N/A	#N/A	#N/A	#N/A	#N/A	#N/A	#N/A	12.9164	#N/A	#N/A	#N/A	#N/A	#N/A	#N/A	#N/A	#N/A	#N/A	#N/A	#N/A	#N/A	13.4641	#N/A	#N/A	#N/A	#N/A	#N/A
2,2-dimethylpropane	CC(C)(C)C	-10.4975	10.3834	#N/A	#N/A	#N/A	#N/A	#N/A	#N/A	#N/A	#N/A	#N/A	#N/A	#N/A	#N/A	#N/A	#N/A	#N/A	7.98719	#N/A	#N/A	#N/A	#N/A	#N/A	#N/A	#N/A	#N/A	#N/A	#N/A	#N/A	#N/A	#N/A	11.5815	#N/A	#N/A	#N/A
