# Supplementary material for: An empirical model for solvation based on surface site interaction points
Source: Chem Sci. 2021 Sep 16;12(39):13193–208. doi: 10.1039/d1sc03392a (PMC8513935; doi:10.1039/d1sc03392a)
Supplement: SC-012-D1SC03392A-s003 [file SC-012-D1SC03392A-s003.xlsx]

## Sheet: 1 ∆G water->nonpolar
This sheet contains a table of non-polar solvents and their associated parameters. Entering a solvent ID from the table into the highlighted cell (L4) pulls in data from the other sheets and calculates the free energies of transfer.
		Solvent descriptors for non-polar solvents									Select solvent ID from table and insert below in cell L4:
ID	Solvent	aS	Ca	bS	Cb	C0					NP2		Benzene/Water
	Water	3.8	-0.762041	3.47	-0.762041	0
NP1	Hexadecane	1.2	2.64	0.6	2.64	0
NP2	Benzene	1.4	2.4963	2	1.09033	0
NP3	Toluene	1.4	2.4963	2	1.09033	0
NP4	Hexane	1.2	2.62477	0.6	2.62477	1.38
NP5	Cyclohexane	1.2	2.60771	0.6	2.60771	1.32968
NP6	CCl4	1.4	2.58	0.6	2.58	1.34
NP7	Dichloromethane	1.8	2.15713	1.4	1.75797	1.73134
NP8	Chloroform	2.1	1.78469	1.3	2.11095	0.6
NP9	1,2-Dichloroethane	1.7	2.22746	1.6	1.40848	1.9318
NP10	Chlorobenzene	1.4	2.50829	1.4	1.70934	1.48
NP11	Perfluoroalkane	1.2	2.41201	0.6	2.41201	0.812826
												Benzene/Water		/
											Solvent ID=		n	rmsd
											NP2		37	1.15917
											C0
											0
										Water	Benzene
									﻿Compound	Calc -DeltaG from reference state	Calc -DeltaG from reference state	Experimental -DeltaG Solvent/Water	Calculated	Diff^2
								1	n-pentane	59.039	81.9196	22.2158	22.8806	0.441939
								2	n-hexane	68.8789	95.5729	25.5077	26.694	1.40743
								3	n-heptane	78.7187	109.226	#N/A	30.5075	0
								4	n-octane	88.5585	122.879	34.3963	34.3209	0.00568334
								5	n-nonane	98.3984	136.533	#N/A	38.1343	0
								6	n-decane	108.238	150.186	#N/A	41.9477	0
								7	n-undecane	118.078	163.839	#N/A	45.7612	0
								8	n-dodecane	127.918	177.492	#N/A	49.5746	0
								9	n-tridecane	137.758	191.146	#N/A	53.388	0
								10	n-tetradecane	147.598	204.799	#N/A	57.2015	0
								11	n-pentadecane	157.437	218.452	#N/A	61.0149	0
								12	n-hexadecane	167.277	232.106	#N/A	64.8283	0
								13	isopentane	59.039	81.9196	#N/A	22.8806	0
								14	2-methylpentane	68.8789	95.5729	#N/A	26.694	0
								15	3-methylpentane	68.8789	95.5729	#N/A	26.694	0
								16	3-methylhexane	78.7187	109.226	#N/A	30.5075	0
								17	3-ethylpentane	78.7187	109.226	#N/A	30.5075	0
								18	2,2-dimethylpentane	78.7187	109.226	#N/A	30.5075	0
								19	3-methylheptane	88.5585	122.879	#N/A	34.3209	0
								20	4-methylheptane	88.5585	122.879	#N/A	34.3209	0
								21	3-ethylhexane	88.5585	122.879	#N/A	34.3209	0
								22	2,5-dimethylhexane	88.5585	122.879	#N/A	34.3209	0
								23	3,3-dimethylhexane	88.5585	122.879	#N/A	34.3209	0
								24	3,4-dimethylhexane	88.5585	122.879	#N/A	34.3209	0
								25	2-methyl-3-ethylpentane	88.5585	122.879	#N/A	34.3209	0
								26	3-methyl-3-ethylpentane	88.5585	122.879	#N/A	34.3209	0
								27	2,2,3-trimethylpentane	88.5585	122.879	#N/A	34.3209	0
								28	2,2,4-trimethylpentane	88.5585	122.879	#N/A	34.3209	0
								29	2,3,3-trimethylpentane	88.5585	122.879	#N/A	34.3209	0
								30	2,3,4-trimethylpentane	88.5585	122.879	#N/A	34.3209	0
								31	2,2,3,3-tetramethylbutane	88.5585	122.879	#N/A	34.3209	0
								32	2-methyloctane	98.3984	136.533	#N/A	38.1343	0
								33	2,2,5-trimethylhexane	98.3984	136.533	#N/A	38.1343	0
								34	3,3-diethylpentane	98.3984	136.533	#N/A	38.1343	0
								35	2,2,4,4-tetramethylpentane	98.3984	136.533	#N/A	38.1343	0
								36	2-methylnonane	108.238	150.186	#N/A	41.9477	0
								37	cyclopentane	49.1992	68.2663	#N/A	19.0672	0
								38	cyclohexane	59.039	81.9196	22.0789	22.8806	0.642737
								39	cycloheptane	68.8789	95.5729	#N/A	26.694	0
								40	cyclooctane	78.7187	109.226	#N/A	30.5075	0
								41	cis-decahydronaphthalene	88.5585	122.879	#N/A	34.3209	0
								42	trans-decahydronaphtalene	88.5585	122.879	#N/A	34.3209	0
								43	methylcyclopentane	59.039	81.9196	#N/A	22.8806	0
								44	methylcyclohexane	68.8789	95.5729	#N/A	26.694	0
								45	ethylcyclohexane	78.7187	109.226	#N/A	30.5075	0
								46	cis-1,2-dimethylcyclohexane	78.7187	109.226	#N/A	30.5075	0
								47	trans-1,4-dimethylcyclohexane	78.7187	109.226	#N/A	30.5075	0
								48	tetrachloromethane	50.9832	71.1583	#N/A	20.1751	0
								49	benzene	61.0272	75.6502	15.4609	14.623	0.702076
								50	water	50.5838	30.9733	-19.6257	-19.6106	0.000228138
								51	methanol	57.1182	44.9591	-10.5545	-12.1591	2.57467
								52	ethanol	66.958	58.6124	-6.61796	-8.34565	2.98491
								53	propan-1-ol	76.7978	72.2656	-4.1077	-4.53222	0.180216
								54	butan-1-ol	86.6377	85.9189	-1.14103	-0.718786	0.178288
								55	pentan-1-ol	96.4775	99.5722	2.225	3.09465	0.756278
								56	hexan-1-ol	106.317	113.225	7.24552	6.90808	0.11387
								57	heptan-1-ol	116.157	126.879	11.0109	10.7215	0.0837557
								58	octan-1-ol	125.997	140.532	16.6019	14.5349	4.27253
								59	nonan-1-ol	135.837	154.185	#N/A	18.3484	0
								60	decan-1-ol	145.677	167.839	#N/A	22.1618	0
								61	dimethylether	57.7506	56.9149	#N/A	-0.835791	0
								62	diethyl ether	77.4303	84.2214	#N/A	6.79107	0
								63	dipropylether	97.11	111.528	#N/A	14.4179	0
								64	dibutylether	116.79	138.834	#N/A	22.0448	0
								65	dipentylether	136.469	166.141	#N/A	29.6717	0
								66	dihexylether	156.149	193.448	#N/A	37.2985	0
								67	chlorobenzene	70.0148	89.8182	#N/A	19.8034	0
								68	1,2-dichlorobenzene	80.9024	104.686	#N/A	23.7838	0
								69	1,2-dichloroethane	60.8673	69.2457	#N/A	8.37841	0
								70	methane	19.6797	27.3065	#N/A	7.62686	0
								71	ethane	29.5195	40.9598	#N/A	11.4403	0
								72	propane	39.3593	54.6131	#N/A	15.2537	0
								73	butane	49.1992	68.2663	#N/A	19.0672	0
								74	trimethylamine	84.8839	81.9534	-1.71154	-2.93048	1.48581
								75	triethylamine	114.403	122.913	#N/A	8.50982	0
								76	tripropylamine	143.923	163.873	#N/A	19.9501	0
								77	tributylamine	173.442	204.833	#N/A	31.3904	0
								78	piperidine	91.7412	92.0132	-0.228205	0.271983	0.250188
								79	diethylamine	91.7412	92.0132	-0.228205	0.271983	0.250188
								80	dipropylamine	111.421	119.32	5.99039	7.89885	3.64219
								81	dibutylamine	131.101	146.626	#N/A	15.5257	0
								82	methylamine	56.7752	46.5521	-7.93014	-10.223	5.25741
								83	ethylamine	66.615	60.2054	-7.41668	-6.40961	1.01418
								84	n-propylamine	76.4549	73.8587	-2.96667	-2.59618	0.137263
								85	n-butylamine	86.2947	87.512	0.342308	1.21725	0.765525
								86	pentylamine	96.1345	101.165	#N/A	5.03068	0
								87	hexylamine	105.974	114.818	#N/A	8.84411	0
								88	heptylamine	115.814	128.472	#N/A	12.6575	0
								89	n-octylamine	125.654	142.125	#N/A	16.471	0
								90	nonylamine	135.494	155.778	#N/A	20.2844	0
								91	c-hexylamine	96.1345	101.165	#N/A	5.03068	0
								92	chlorocyclohexane	73.3249	95.2625	#N/A	21.9376	0
								93	ethyl benzene	84.4188	106.957	#N/A	22.5382	0
								94	decyl benzene	163.138	216.183	#N/A	53.0457	0
								95	toluene	74.579	93.3038	18.5417	18.7248	0.0335252
								96	o-xylene	88.1308	110.957	#N/A	22.8266	0
								97	m-xylene	88.1308	110.957	#N/A	22.8266	0
								98	p-xylene	88.1308	110.957	#N/A	22.8266	0
								99	mesitylene	102.443	128.891	#N/A	26.4483	0
								100	1,2,4,5-tetramethylbenzene	117.514	147.104	#N/A	29.5901	0
								101	hexamethylbenzene	141.578	181.292	#N/A	39.7137	0
								102	pentamethylbenzene	129.546	164.198	#N/A	34.6519	0
								103	propanone	76.2715	74.1993	-0.285257	-2.07213	3.19291
								104	butanone	86.1113	87.8526	3.13783	1.7413	1.95027
								105	pentan-2-one	95.9511	101.506	6.78911	5.55474	1.52369
								106	pentan-3-one	95.9511	101.506	#N/A	5.55474	0
								107	hexan-2-one	105.791	115.159	10.3263	9.36817	0.918015
								108	hexan-3-one	105.791	115.159	#N/A	9.36817	0
								109	heptan-4-one	115.631	128.812	#N/A	13.1816	0
								110	4-methylpentan-2-one	105.791	115.159	#N/A	9.36817	0
								111	undecan-6-one	154.99	183.425	#N/A	28.4353	0
								112	cyclopentanone	86.1113	87.8526	#N/A	1.7413	0
								113	cyclohexanone	95.9511	101.506	#N/A	5.55474	0
								114	cycloheptanone	105.791	115.159	#N/A	9.36817	0
								115	cyclooctanone	115.631	128.812	#N/A	13.1816	0
								116	phenol	97.6971	99.2231	2.1109	1.52605	0.342056
								117	3-methylphenol	111.249	116.877	#N/A	5.62782	0
								118	4-methylphenol	111.249	116.877	5.07757	5.62782	0.302771
								119	3,4-dimethylphenol	124.801	134.53	#N/A	9.72959	0
								120	3,5-dimethylphenol	124.801	134.53	#N/A	9.72959	0
								121	3-chlorophenol	107.065	113.531	#N/A	6.46642	0
								122	4-chlorophenol	107.065	113.531	#N/A	6.46642	0
								123	3,4-dichlorophenol	117.952	128.399	#N/A	10.4468	0
								124	3,5-dichlorophenol	117.952	128.399	#N/A	10.4468	0
								125	chloroethane	45.1934	55.1027	#N/A	9.90935	0
								126	1-chloropropane	55.0332	68.756	#N/A	13.7228	0
								127	1-chlorobutane	64.8731	82.4093	#N/A	17.5362	0
								128	1,3-dichloropropane	70.7071	82.8989	#N/A	12.1918	0
								129	1-chloropentane	74.7129	96.0625	#N/A	21.3496	0
								130	1-chloroheptane	94.3926	123.369	#N/A	28.9765	0
								131	naphthalene	98.5811	122.019	#N/A	23.4379	0
								132	phenanthrene	137.252	168.799	#N/A	31.5474	0
								133	﻿anthracene	137.252	168.799	30.5225	31.5474	1.05037
								134	pyrene	160.139	193.894	34.1167	33.7547	0.131028
								135	pyridine	83.1492	84.1962	2.45321	1.04699	1.97746
								136	acetonitrile	66.1164	63.0999	#N/A	-3.01656	0
								137	proprionitrile	75.9563	76.7531	#N/A	0.79687	0
								138	1-cyanopropane	85.7961	90.4064	#N/A	4.6103	0
								139	1-cyanobutane	95.6359	104.06	#N/A	8.42373	0
								140	1-cyanopentane	105.476	117.713	#N/A	12.2372	0
								141	biphenyl	116.598	144.528	#N/A	27.9293	0
								142	ammonia	41.6632	28.4618	#N/A	-13.2013	0
								143	t-butyl chloride	62.0971	80.8093	#N/A	18.7122	0
								144	tetrahydropyran	77.4303	84.2214	#N/A	6.79107	0
								145	tetrahydrofuran	67.5905	70.5681	#N/A	2.97764	0
								146	tetrahydrothiophene	66.5534	75.7402	#N/A	9.18672	0
								147	pentamethylene sulfide	76.3933	89.3934	#N/A	13.0002	0
								148	4-ethylphenol	121.089	130.53	#N/A	9.44125	0
								149	d-valerolactam	120.521	109.484	#N/A	-11.0368	0
								150	n-methyl-d-valerolactam	126.285	123.25	#N/A	-3.03543	0
								151	n,n-dimethylacetamide	116.445	109.596	#N/A	-6.84886	0
								152	n-formylpiperidine	126.285	123.25	#N/A	-3.03543	0
								153	n-methylpiperidine	104.564	109.26	#N/A	4.69639	0
								154	2-methylpiperidine	101.581	105.666	#N/A	4.08541	0
								155	3-methylpiperidine	101.581	105.666	#N/A	4.08541	0
								156	4-methylpiperidine	101.581	105.666	#N/A	4.08541	0
								157	pyrrolidine	81.9014	78.36	#N/A	-3.54145	0
								158	n-methylpyrrolidine	94.7237	95.6067	#N/A	0.882954	0
								159	2-pyrrolidinone	110.681	95.8308	#N/A	-14.8503	0
								160	n-methyl-2-pyrrolidinone	116.445	109.596	#N/A	-6.84886	0
								161	n-acetylpiperidine	136.125	136.903	#N/A	0.777999	0
								162	dimethylsulfide	56.7136	62.0869	#N/A	5.37329	0
								163	diethylsulfide	76.3933	89.3934	#N/A	13.0002	0
								164	dipropylsulfide	96.073	116.7	#N/A	20.627	0
								165	diisopropylsulfide	96.073	116.7	#N/A	20.627	0
								166	methylethylsulfide	66.5534	75.7402	#N/A	9.18672	0
								167	ethene	36.4879	44.6072	#N/A	8.11936	0
								168	propene	46.3277	58.2605	#N/A	11.9328	0
								169	1-butene	56.1676	71.9138	#N/A	15.7462	0
								170	pent-1-ene	66.0074	85.5671	#N/A	19.5597	0
								171	hex-1-ene	75.8472	99.2203	#N/A	23.3731	0
								172	hept-1-ene	85.6871	112.874	#N/A	27.1865	0
								173	oct-1-ene	95.5269	126.527	#N/A	31	0
								174	non-1-ene	105.367	140.18	#N/A	34.8134	0
								175	dec-1-ene	115.207	153.833	#N/A	38.6268	0
								176	undec-1-ene	125.046	167.487	#N/A	42.4402	0
								177	dodec-1-ene	134.886	181.14	#N/A	46.2537	0
								178	n-methylformamide	100.841	82.1776	#N/A	-18.6637	0
								179	n,n-dimethylformamide	106.605	95.9431	#N/A	-10.6623	0
								180	n,n-diethylformamide	126.285	123.25	#N/A	-3.03543	0
								181	n,n-dibutylformamide	165.644	177.863	#N/A	12.2183	0
								182	n-methylacetamide	110.681	95.8308	#N/A	-14.8503	0
								183	n-ethylacetamide	120.521	109.484	#N/A	-11.0368	0
								184	n-butylacetamide	140.201	136.791	#N/A	-3.40998	0
								185	n,n-diethylacetamide	136.125	136.903	#N/A	0.777999	0
								186	methylethylether	67.5905	70.5681	#N/A	2.97764	0
								187	methylcyclohexylether	97.11	111.528	#N/A	14.4179	0
								188	undecan-1-ol	155.517	181.492	#N/A	25.9752	0
								189	dodecan-1-ol	165.356	195.145	#N/A	29.7887	0
								190	tridecan-1-ol	175.196	208.798	#N/A	33.6021	0
								191	tetradecan-1-ol	185.036	222.452	#N/A	37.4155	0
								192	pentadecan-1-ol	194.876	236.105	#N/A	41.229	0
								193	hexadecan-1-ol	204.716	249.758	#N/A	45.0424	0
								194	heptadecan-1-ol	214.556	263.411	#N/A	48.8558	0
								195	octadecan-1-ol	224.395	277.065	#N/A	52.6693	0
								196	nonadecan-1-ol	234.235	290.718	#N/A	56.4827	0
								197	eicosan-1-ol	244.075	304.371	#N/A	60.2961	0
								198	adamantan-1-ol	116.157	126.879	#N/A	10.7215	0
								199	propan-2-ol	76.7978	72.2656	-5.30578	-4.53222	0.598396
								200	butan-2-ol	86.6377	85.9189	#N/A	-0.718786	0
								201	pentan-2-ol	96.4775	99.5722	#N/A	3.09465	0
								202	hexan-2-ol	106.317	113.225	#N/A	6.90808	0
								203	heptan-2-ol	116.157	126.879	#N/A	10.7215	0
								204	octan-2-ol	125.997	140.532	#N/A	14.5349	0
								205	2-methylbutan-2-ol	96.4775	99.5722	#N/A	3.09465	0
								206	2-methylpropan-2-ol	86.6377	85.9189	-3.25193	-0.718786	6.41681
								207	2-methylpentan-2-ol	106.317	113.225	#N/A	6.90808	0
								208	2-methylhexan-2-ol	116.157	126.879	#N/A	10.7215	0
								209	2-methylheptan-2-ol	125.997	140.532	#N/A	14.5349	0
								210	cyclopentanol	86.6377	85.9189	#N/A	-0.718786	0
								211	cyclohexanol	96.4775	99.5722	#N/A	3.09465	0
								212	cycloheptanol	106.317	113.225	#N/A	6.90808	0
								213	cyclooctanol	116.157	126.879	#N/A	10.7215	0
								214	adamantane	78.7187	109.226	#N/A	30.5075	0
								215	cyclohexylmethylketone	115.631	128.812	#N/A	13.1816	0
								216	2-methylcyclohexanone	105.791	115.159	#N/A	9.36817	0
								217	cyclopropane	29.5195	40.9598	#N/A	11.4403	0
								218	propylcyclopentane	78.7187	109.226	#N/A	30.5075	0
								219	pentylcyclopentane	98.3984	136.533	#N/A	38.1343	0
								220	propylcyclohexane	88.5585	122.879	#N/A	34.3209	0
								221	butylcyclohexane	98.3984	136.533	#N/A	38.1343	0
								222	t-butylcyclohexane	98.3984	136.533	#N/A	38.1343	0
								223	2-methylpyridine	98.221	102.41	5.13462	4.18876	0.894655
								224	3-methylpyridine	98.221	102.41	#N/A	4.18876	0
								225	4-methylpyridine	98.221	102.41	#N/A	4.18876	0
								226	2,3-dimethylpyridine	113.293	120.623	#N/A	7.33053	0
								227	2,4-dimethylpyridine	113.293	120.623	#N/A	7.33053	0
								228	2,5-dimethylpyridine	113.293	120.623	#N/A	7.33053	0
								229	2,6-dimethylpyridine	113.293	120.623	7.53078	7.33053	0.0400989
								230	3,4-dimethylpyridine	113.293	120.623	#N/A	7.33053	0
								231	3,5-dimethylpyridine	113.293	120.623	#N/A	7.33053	0
								232	quinoline	119.897	130.268	#N/A	10.3711	0
								233	isoquinoline	119.897	130.268	#N/A	10.3711	0
								234	propylbenzene	94.2587	120.61	#N/A	26.3517	0
								235	butylbenzene	104.098	134.264	#N/A	30.1651	0
								236	pentylbenzene	113.938	147.917	#N/A	33.9785	0
								237	hexylbenzene	123.778	161.57	#N/A	37.792	0
								238	isopropylbenzene	94.2587	120.61	#N/A	26.3517	0
								239	tert-butylbenzene	104.098	134.264	#N/A	30.1651	0
								240	1,3-dichlorobenzene	80.9024	104.686	#N/A	23.7838	0
								241	1,4-dichlorobenzene	80.9024	104.686	#N/A	23.7838	0
								242	fluoranthene	147.58	183.712	34.3449	36.1327	3.19621
								243	coronene	244.583	290.862	#N/A	46.279	0
								244	acenaphthene	112.805	142.553	#N/A	29.748	0
								245	fluorene	124.022	152.528	#N/A	28.506	0
								246	indane	88.1308	110.957	#N/A	22.8266	0
								247	fluoroethane	38.0762	44.5483	#N/A	6.47206	0
								248	1-fluoropropane	47.9161	58.2016	#N/A	10.2855	0
								249	2-fluoropropane	47.7011	57.7616	#N/A	10.0605	0
								250	1-fluorobutane	57.7559	71.8548	#N/A	14.0989	0
								251	1-fluoropentane	67.5958	85.5081	#N/A	17.9124	0
								252	fluorobenzene	63.2463	79.3295	#N/A	16.0832	0
								253	1,2-difluorobenzene	67.3653	83.7088	#N/A	16.3434	0
								254	1,3-difluorobenzene	67.3653	83.7088	#N/A	16.3434	0
								255	1,4-difluorobenzene	67.3653	83.7088	#N/A	16.3434	0
								256	o-fluorochlorobenzene	74.1339	94.1975	#N/A	20.0636	0
								257	m-fluorochlorobenzene	74.1339	94.1975	#N/A	20.0636	0
								258	p-fluorochlorobenzene	74.1339	94.1975	#N/A	20.0636	0
								259	3-fluorophenol	100.296	103.042	#N/A	2.74625	0
								260	4-fluorophenol	100.296	103.042	#N/A	2.74625	0
								261	fluoromethane	28.4514	31.335	#N/A	2.88362	0
								262	cis-but-2-ene	56.1676	71.9138	#N/A	15.7462	0
								263	trans-but-2-ene	56.1676	71.9138	#N/A	15.7462	0
								264	2-methylbut-2-ene	66.0074	85.5671	#N/A	19.5597	0
								265	2,3-dimethylbut-2-ene	75.8472	99.2203	#N/A	23.3731	0
								266	2,2-dimethylpropane	59.039	81.9196	#N/A	22.8806	0

## Sheet: 2 ∆G water->polar
This sheet contains a table polar organic solvents and their associated parameters. Entering a solvent Id from the table into the highlighted cell (P4) pulls in data from the other sheets and calculates the free energies of transfer.
		Solvent descriptors for polar organic solvents													Select solvent ID from table and insert below in cell P4:
Solvent ID	Solvent Class	aS1	Ca1	bS1	Cb1	aS2	Ca2	bS2	Cb2	C0					P10		Methanol/Water
	ethers
P1	Diethyl Ether	1.2	2.58166	0.6	2.98187	0	-100	5.3	-3.64805	2.26314
P2	Di-n-butyl ether	1.2	2.58166	0.6	2.98187	0	-100	5.3	-3.64805	2.26314
P3	Tetrahydrofuran	1.2	2.58166	0.6	2.98187	0	-100	5.3	-3.64805	2.26314
	nitriles
P4	Acetonitrile	1.2	-0.789579	0.6	2.69158	1.5	2.67349	5.15	-3.5369	3.54561
P5	Propionitrile	1.2	-0.789579	0.6	2.69158	1.5	2.67349	5.15	-3.5369	3.54561
P6	Butyronitrile	1.2	-0.789579	0.6	2.69158	1.5	2.67349	5.15	-3.5369	3.54561
	ketones
P7	Acetone	1.2	-0.771193	0.6	2.8181	1.5	2.71306	5.8	-4.09214	1.89005
P8	Butanone	1.2	-0.771193	0.6	2.8181	1.5	2.71306	5.8	-4.09214	1.89005
P9	Cyclohexanone	1.2	-0.771193	0.6	2.8181	1.5	2.71306	5.8	-4.09214	1.89005
	alcohols	1.2	2.75001	0.6	2.95421	3.5	-6.02105	6.9	-6.4215	0.180796
P10	Methanol	1.2	2.75001	0.6	2.95421	3.5	-6.02105	6.9	-6.4215	0.180796
P11	Ethanol	1.2	2.75001	0.6	2.95421	3.5	-6.02105	6.9	-6.4215	0.180796
P12	Propan-1-ol	1.2	2.75001	0.6	2.95421	3.5	-6.02105	6.9	-6.4215	0.180796
P13	Butan-1-ol	1.2	2.75001	0.6	2.95421	3.5	-6.02105	6.9	-6.4215	0.180796
P14	Pentan-1-ol	1.2	2.75001	0.6	2.95421	3.5	-6.02105	6.9	-6.4215	0.180796
P15	Hexan-1-ol	1.2	2.75001	0.6	2.95421	3.5	-6.02105	6.9	-6.4215	0.180796
P16	Heptan-1-ol	1.2	2.75001	0.6	2.95421	3.5	-6.02105	6.9	-6.4215	0.180796
P17	Octan-1-ol (dry)	1.2	2.75001	0.6	2.95421	3.5	-6.02105	6.9	-6.4215	0.180796
P18	Octan-1-ol (wet)	1.2	2.75001	0.6	2.95421	3.5	-6.02105	6.9	-6.4215	0.180796
P19	Decan-1-ol	1.2	2.75001	0.6	2.95421	3.5	-6.02105	6.9	-6.4215	0.180796						Methanol/Water
P20	Propan-2-ol	1.2	2.75001	0.6	2.95421	3.5	-6.02105	6.9	-6.4215	0.180796					Solvent ID=			/
P21	Butan-2-ol	1.2	2.75001	0.6	2.95421	3.5	-6.02105	6.9	-6.4215	0.180796					P10		n	rmsd
P22	2-Methylpropan-1-ol	1.2	2.75001	0.6	2.95421	3.5	-6.02105	6.9	-6.4215	0.180796					C0		63	2.03058
P23	2-Methylpropan-2-ol	1.2	2.75001	0.6	2.95421	3.5	-6.02105	6.9	-6.4215	0.180796					0.180796
P24	3-Methylbutan-1-ol	1.2	2.75001	0.6	2.95421	3.5	-6.02105	6.9	-6.4215	0.180796				Water	Methanol
													﻿Solute	Calc -DeltaG from reference state	Calc -DeltaG from reference state	Experimental -DeltaG Solvent/Water	Calculated	Diff^2
												1	n-pentane	59.039	79.0288	19.1921	19.9898	0.636367
												2	n-hexane	68.8789	92.1702	22.0846	23.2913	1.45618
												3	n-heptane	78.7187	105.312	25.4506	26.5928	1.30461
												4	n-octane	88.5585	118.453	28.1206	29.8943	3.14598
												5	n-nonane	98.3984	131.594	30.6936	33.1958	6.26089
												6	n-decane	108.238	144.736	#N/A	36.4973	0
												7	n-undecane	118.078	157.877	#N/A	39.7988	0
												8	n-dodecane	127.918	171.018	#N/A	43.1003	0
												9	n-tridecane	137.758	184.16	#N/A	46.4018	0
												10	n-tetradecane	147.598	197.301	#N/A	49.7033	0
												11	n-pentadecane	157.437	210.442	#N/A	53.0048	0
												12	n-hexadecane	167.277	223.584	#N/A	56.3063	0
												13	isopentane	59.039	79.0288	#N/A	19.9898	0
												14	2-methylpentane	68.8789	92.1702	21.651	23.2913	2.69063
												15	3-methylpentane	68.8789	92.1702	#N/A	23.2913	0
												16	3-methylhexane	78.7187	105.312	#N/A	26.5928	0
												17	3-ethylpentane	78.7187	105.312	#N/A	26.5928	0
												18	2,2-dimethylpentane	78.7187	105.312	#N/A	26.5928	0
												19	3-methylheptane	88.5585	118.453	#N/A	29.8943	0
												20	4-methylheptane	88.5585	118.453	#N/A	29.8943	0
												21	3-ethylhexane	88.5585	118.453	#N/A	29.8943	0
												22	2,5-dimethylhexane	88.5585	118.453	#N/A	29.8943	0
												23	3,3-dimethylhexane	88.5585	118.453	#N/A	29.8943	0
												24	3,4-dimethylhexane	88.5585	118.453	#N/A	29.8943	0
												25	2-methyl-3-ethylpentane	88.5585	118.453	#N/A	29.8943	0
												26	3-methyl-3-ethylpentane	88.5585	118.453	#N/A	29.8943	0
												27	2,2,3-trimethylpentane	88.5585	118.453	#N/A	29.8943	0
												28	2,2,4-trimethylpentane	88.5585	118.453	#N/A	29.8943	0
												29	2,3,3-trimethylpentane	88.5585	118.453	#N/A	29.8943	0
												30	2,3,4-trimethylpentane	88.5585	118.453	25.8899	29.8943	16.0352
												31	2,2,3,3-tetramethylbutane	88.5585	118.453	#N/A	29.8943	0
												32	2-methyloctane	98.3984	131.594	#N/A	33.1958	0
												33	2,2,5-trimethylhexane	98.3984	131.594	#N/A	33.1958	0
												34	3,3-diethylpentane	98.3984	131.594	27.2712	33.1958	35.1013
												35	2,2,4,4-tetramethylpentane	98.3984	131.594	#N/A	33.1958	0
												36	2-methylnonane	108.238	144.736	#N/A	36.4973	0
												37	cyclopentane	49.1992	65.8875	15.9744	16.6883	0.509684
												38	cyclohexane	59.039	79.0288	18.9981	19.9898	0.98347
												39	cycloheptane	68.8789	92.1702	#N/A	23.2913	0
												40	cyclooctane	78.7187	105.312	#N/A	26.5928	0
												41	cis-decahydronaphthalene	88.5585	118.453	#N/A	29.8943	0
												42	trans-decahydronaphtalene	88.5585	118.453	#N/A	29.8943	0
												43	methylcyclopentane	59.039	79.0288	#N/A	19.9898	0
												44	methylcyclohexane	68.8789	92.1702	#N/A	23.2913	0
												45	ethylcyclohexane	78.7187	105.312	25.907	26.5928	0.470299
												46	cis-1,2-dimethylcyclohexane	78.7187	105.312	#N/A	26.5928	0
												47	trans-1,4-dimethylcyclohexane	78.7187	105.312	#N/A	26.5928	0
												48	tetrachloromethane	50.9832	68.9292	15.518	17.946	5.89521
												49	benzene	61.0272	72.7442	12.209	11.7171	0.242001
												50	water	50.5838	44.387	-3.53719	-6.19687	7.07394
												51	methanol	57.1182	51.8678	-0.798719	-5.25037	19.8172
												52	ethanol	66.958	65.0091	1.25513	-1.94887	10.2656
												53	propan-1-ol	76.7978	78.1505	4.56411	1.35264	10.3136
												54	butan-1-ol	86.6377	91.2918	6.27565	4.65414	2.6293
												55	pentan-1-ol	96.4775	104.433	9.01412	7.95564	1.12037
												56	hexan-1-ol	106.317	117.574	11.7526	11.2571	0.245461
												57	heptan-1-ol	116.157	130.716	14.1487	14.5586	0.168021
												58	octan-1-ol	125.997	143.857	16.4878	17.8601	1.88321
												59	nonan-1-ol	135.837	156.999	19.3975	21.1616	3.11234
												60	decan-1-ol	145.677	170.14	#N/A	24.4632	0
												61	dimethylether	57.7506	57.0776	1.65449	-0.673065	5.41751
												62	diethyl ether	77.4303	83.3603	6.3327	5.92994	0.162219
												63	dipropylether	97.11	109.643	11.3532	12.5329	1.39174
												64	dibutylether	116.79	135.926	17.2866	19.1359	3.42021
												65	dipentylether	136.469	162.208	#N/A	25.739	0
												66	dihexylether	156.149	188.491	#N/A	32.342	0
												67	chlorobenzene	70.0148	87.0237	16.2596	17.0089	0.561424
												68	1,2-dichlorobenzene	80.9024	101.78	#N/A	20.8774	0
												69	1,2-dichloroethane	60.8673	67.4624	#N/A	6.59514	0
												70	methane	19.6797	26.4635	6.80052	6.7838	0.000279688
												71	ethane	29.5195	39.6048	9.79002	10.0853	0.087194
												72	propane	39.3593	52.7462	12.9849	13.3868	0.161533
												73	butane	49.1992	65.8875	15.9173	16.6883	0.594399
												74	trimethylamine	84.8839	86.3025	#N/A	1.41857	0
												75	triethylamine	114.403	125.726	8.4436	11.3231	8.29138
												76	tripropylamine	143.923	165.151	#N/A	21.2276	0
												77	tributylamine	173.442	204.575	#N/A	31.1321	0
												78	piperidine	91.7412	97.0171	#N/A	5.27588	0
												79	diethylamine	91.7412	97.0171	4.2218	5.27588	1.11108
												80	dipropylamine	111.421	123.3	#N/A	11.8789	0
												81	dibutylamine	131.101	149.582	#N/A	18.4819	0
												82	methylamine	56.7752	54.1535	#N/A	-2.62169	0
												83	ethylamine	66.615	67.2948	#N/A	0.679808	0
												84	n-propylamine	76.4549	80.4362	#N/A	3.98131	0
												85	n-butylamine	86.2947	93.5775	#N/A	7.28281	0
												86	pentylamine	96.1345	106.719	#N/A	10.5843	0
												87	hexylamine	105.974	119.86	#N/A	13.8858	0
												88	heptylamine	115.814	133.002	#N/A	17.1873	0
												89	n-octylamine	125.654	146.143	#N/A	20.4888	0
												90	nonylamine	135.494	159.284	#N/A	23.7903	0
												91	c-hexylamine	96.1345	106.719	#N/A	10.5843	0
												92	chlorocyclohexane	73.3249	91.8341	#N/A	18.5092	0
												93	ethyl benzene	84.4188	102.824	17.1154	18.4049	1.6627
												94	decyl benzene	163.138	207.954	#N/A	44.8169	0
												95	toluene	74.579	89.6824	14.491	15.1034	0.374934
												96	o-xylene	88.1308	106.626	#N/A	18.4954	0
												97	m-xylene	88.1308	106.626	#N/A	18.4954	0
												98	p-xylene	88.1308	106.626	#N/A	18.4954	0
												99	mesitylene	102.443	123.803	#N/A	21.3609	0
												100	1,2,4,5-tetramethylbenzene	117.514	141.329	22.8034	23.8147	1.02258
												101	hexamethylbenzene	141.578	174.41	#N/A	32.8315	0
												102	pentamethylbenzene	129.546	157.869	#N/A	28.3231	0
												103	propanone	76.2715	75.2919	0.342308	-0.979595	1.74743
												104	butanone	86.1113	88.4332	3.53719	2.32191	1.4769
												105	pentan-2-one	95.9511	101.575	5.70514	5.62341	0.00667942
												106	pentan-3-one	95.9511	101.575	#N/A	5.62341	0
												107	hexan-2-one	105.791	114.716	8.04424	8.92491	0.775576
												108	hexan-3-one	105.791	114.716	#N/A	8.92491	0
												109	heptan-4-one	115.631	127.857	11.2962	12.2264	0.86535
												110	4-methylpentan-2-one	105.791	114.716	#N/A	8.92491	0
												111	undecan-6-one	154.99	180.423	#N/A	25.4324	0
												112	cyclopentanone	86.1113	88.4332	#N/A	2.32191	0
												113	cyclohexanone	95.9511	101.575	#N/A	5.62341	0
												114	cycloheptanone	105.791	114.716	#N/A	8.92491	0
												115	cyclooctanone	115.631	127.857	#N/A	12.2264	0
												116	phenol	97.6971	105.608	#N/A	7.91102	0
												117	3-methylphenol	111.249	122.55	#N/A	11.3009	0
												118	4-methylphenol	111.249	122.55	#N/A	11.3009	0
												119	3,4-dimethylphenol	124.801	139.504	#N/A	14.703	0
												120	3,5-dimethylphenol	124.801	139.504	#N/A	14.703	0
												121	3-chlorophenol	107.065	119.998	#N/A	12.9333	0
												122	4-chlorophenol	107.065	119.998	#N/A	12.9333	0
												123	3,4-dichlorophenol	117.952	134.767	#N/A	16.8146	0
												124	3,5-dichlorophenol	117.952	134.767	#N/A	16.8146	0
												125	chloroethane	45.1934	53.5336	8.38655	8.34022	0.00214649
												126	1-chloropropane	55.0332	66.675	#N/A	11.6417	0
												127	1-chlorobutane	64.8731	79.8163	#N/A	14.9432	0
												128	1,3-dichloropropane	70.7071	80.6037	#N/A	9.89664	0
												129	1-chloropentane	74.7129	92.9576	#N/A	18.2447	0
												130	1-chloroheptane	94.3926	119.24	#N/A	24.8477	0
												131	naphthalene	98.5811	117.4	19.2834	18.8185	0.216054
												132	phenanthrene	137.252	162.347	25.3308	25.0956	0.055345
												133	﻿anthracene	137.252	162.347	24.0757	25.0956	1.04015
												134	pyrene	160.139	186.315	26.8769	26.1765	0.490626
												135	pyridine	83.1492	88.4666	#N/A	5.31743	0
												136	acetonitrile	66.1164	62.9182	0.627565	-3.1982	14.6364
												137	proprionitrile	75.9563	76.0596	4.50706	0.103307	19.393
												138	1-cyanopropane	85.7961	89.2009	6.56091	3.40481	9.96096
												139	1-cyanobutane	95.6359	102.342	#N/A	6.70631	0
												140	1-cyanopentane	105.476	115.484	#N/A	10.0078	0
												141	biphenyl	116.598	138.964	21.8507	22.3657	0.265237
												142	ammonia	41.6632	34.2905	-5.30578	-7.37263	4.27187
												143	t-butyl chloride	62.0971	77.5693	#N/A	15.4723	0
												144	tetrahydropyran	77.4303	83.3603	#N/A	5.92994	0
												145	tetrahydrofuran	67.5905	70.2189	3.93654	2.62844	1.71115
												146	tetrahydrothiophene	66.5534	72.62	#N/A	6.06659	0
												147	pentamethylene sulfide	76.3933	85.7614	#N/A	9.36809	0
												148	4-ethylphenol	121.089	135.691	#N/A	14.6024	0
												149	d-valerolactam	120.521	120.492	#N/A	-0.0286857	0
												150	n-methyl-d-valerolactam	126.285	127.304	#N/A	1.01902	0
												151	n,n-dimethylacetamide	116.445	114.163	#N/A	-2.28248	0
												152	n-formylpiperidine	126.285	127.304	#N/A	1.01902	0
												153	n-methylpiperidine	104.564	112.585	#N/A	8.02158	0
												154	2-methylpiperidine	101.581	110.158	#N/A	8.57738	0
												155	3-methylpiperidine	101.581	110.158	#N/A	8.57738	0
												156	4-methylpiperidine	101.581	110.158	#N/A	8.57738	0
												157	pyrrolidine	81.9014	83.8758	#N/A	1.97438	0
												158	n-methylpyrrolidine	94.7237	99.4438	#N/A	4.72008	0
												159	2-pyrrolidinone	110.681	107.351	#N/A	-3.33019	0
												160	n-methyl-2-pyrrolidinone	116.445	114.163	#N/A	-2.28248	0
												161	n-acetylpiperidine	136.125	140.445	#N/A	4.32052	0
												162	dimethylsulfide	56.7136	59.4787	#N/A	2.76508	0
												163	diethylsulfide	76.3933	85.7614	#N/A	9.36809	0
												164	dipropylsulfide	96.073	112.044	#N/A	15.9711	0
												165	diisopropylsulfide	96.073	112.044	#N/A	15.9711	0
												166	methylethylsulfide	66.5534	72.62	#N/A	6.06659	0
												167	ethene	36.4879	42.9053	7.70194	6.41738	1.65008
												168	propene	46.3277	56.0466	10.9539	9.71888	1.52517
												169	1-butene	56.1676	69.1879	#N/A	13.0204	0
												170	pent-1-ene	66.0074	82.3293	#N/A	16.3219	0
												171	hex-1-ene	75.8472	95.4706	#N/A	19.6234	0
												172	hept-1-ene	85.6871	108.612	#N/A	22.9249	0
												173	oct-1-ene	95.5269	121.753	#N/A	26.2264	0
												174	non-1-ene	105.367	134.895	#N/A	29.5279	0
												175	dec-1-ene	115.207	148.036	#N/A	32.8294	0
												176	undec-1-ene	125.046	161.177	#N/A	36.1309	0
												177	dodec-1-ene	134.886	174.319	#N/A	39.4324	0
												178	n-methylformamide	100.841	94.2096	#N/A	-6.63169	0
												179	n,n-dimethylformamide	106.605	101.021	#N/A	-5.58398	0
												180	n,n-diethylformamide	126.285	127.304	#N/A	1.01902	0
												181	n,n-dibutylformamide	165.644	179.869	#N/A	14.225	0
												182	n-methylacetamide	110.681	107.351	#N/A	-3.33019	0
												183	n-ethylacetamide	120.521	120.492	#N/A	-0.0286857	0
												184	n-butylacetamide	140.201	146.775	#N/A	6.57432	0
												185	n,n-diethylacetamide	136.125	140.445	#N/A	4.32052	0
												186	methylethylether	67.5905	70.2189	#N/A	2.62844	0
												187	methylcyclohexylether	97.11	109.643	#N/A	12.5329	0
												188	undecan-1-ol	155.517	183.281	#N/A	27.7647	0
												189	dodecan-1-ol	165.356	196.423	#N/A	31.0662	0
												190	tridecan-1-ol	175.196	209.564	#N/A	34.3677	0
												191	tetradecan-1-ol	185.036	222.705	#N/A	37.6692	0
												192	pentadecan-1-ol	194.876	235.847	#N/A	40.9707	0
												193	hexadecan-1-ol	204.716	248.988	#N/A	44.2722	0
												194	heptadecan-1-ol	214.556	262.129	#N/A	47.5737	0
												195	octadecan-1-ol	224.395	275.271	#N/A	50.8752	0
												196	nonadecan-1-ol	234.235	288.412	#N/A	54.1767	0
												197	eicosan-1-ol	244.075	301.553	#N/A	57.4782	0
												198	adamantan-1-ol	116.157	130.716	#N/A	14.5586	0
												199	propan-2-ol	76.7978	78.1505	#N/A	1.35264	0
												200	butan-2-ol	86.6377	91.2918	#N/A	4.65414	0
												201	pentan-2-ol	96.4775	104.433	#N/A	7.95564	0
												202	hexan-2-ol	106.317	117.574	#N/A	11.2571	0
												203	heptan-2-ol	116.157	130.716	#N/A	14.5586	0
												204	octan-2-ol	125.997	143.857	#N/A	17.8601	0
												205	2-methylbutan-2-ol	96.4775	104.433	#N/A	7.95564	0
												206	2-methylpropan-2-ol	86.6377	91.2918	#N/A	4.65414	0
												207	2-methylpentan-2-ol	106.317	117.574	#N/A	11.2571	0
												208	2-methylhexan-2-ol	116.157	130.716	#N/A	14.5586	0
												209	2-methylheptan-2-ol	125.997	143.857	#N/A	17.8601	0
												210	cyclopentanol	86.6377	91.2918	#N/A	4.65414	0
												211	cyclohexanol	96.4775	104.433	#N/A	7.95564	0
												212	cycloheptanol	106.317	117.574	#N/A	11.2571	0
												213	cyclooctanol	116.157	130.716	#N/A	14.5586	0
												214	adamantane	78.7187	105.312	#N/A	26.5928	0
												215	cyclohexylmethylketone	115.631	127.857	#N/A	12.2264	0
												216	2-methylcyclohexanone	105.791	114.716	#N/A	8.92491	0
												217	cyclopropane	29.5195	39.6048	#N/A	10.0853	0
												218	propylcyclopentane	78.7187	105.312	#N/A	26.5928	0
												219	pentylcyclopentane	98.3984	131.594	#N/A	33.1958	0
												220	propylcyclohexane	88.5585	118.453	#N/A	29.8943	0
												221	butylcyclohexane	98.3984	131.594	#N/A	33.1958	0
												222	t-butylcyclohexane	98.3984	131.594	#N/A	33.1958	0
												223	2-methylpyridine	98.221	105.807	#N/A	7.58643	0
												224	3-methylpyridine	98.221	105.807	#N/A	7.58643	0
												225	4-methylpyridine	98.221	105.807	#N/A	7.58643	0
												226	2,3-dimethylpyridine	113.293	123.149	#N/A	9.85635	0
												227	2,4-dimethylpyridine	113.293	123.149	#N/A	9.85635	0
												228	2,5-dimethylpyridine	113.293	123.149	#N/A	9.85635	0
												229	2,6-dimethylpyridine	113.293	123.149	#N/A	9.85635	0
												230	3,4-dimethylpyridine	113.293	123.149	#N/A	9.85635	0
												231	3,5-dimethylpyridine	113.293	123.149	#N/A	9.85635	0
												232	quinoline	119.897	132.906	#N/A	13.0094	0
												233	isoquinoline	119.897	132.906	#N/A	13.0094	0
												234	propylbenzene	94.2587	115.965	20.0821	21.7064	2.63831
												235	butylbenzene	104.098	129.106	22.7635	25.0079	5.03722
												236	pentylbenzene	113.938	142.248	#N/A	28.3094	0
												237	hexylbenzene	123.778	155.389	29.6667	31.6109	3.77977
												238	isopropylbenzene	94.2587	115.965	20.4244	21.7064	1.64347
												239	tert-butylbenzene	104.098	129.106	21.2802	25.0079	13.8958
												240	1,3-dichlorobenzene	80.9024	101.78	#N/A	20.8774	0
												241	1,4-dichlorobenzene	80.9024	101.78	#N/A	20.8774	0
												242	fluoranthene	147.58	176.984	27.0652	29.404	5.47025
												243	coronene	244.583	279.199	#N/A	34.6153	0
												244	acenaphthene	112.805	137.339	21.1661	24.5339	11.3425
												245	fluorene	124.022	146.558	23.0316	22.5353	0.246351
												246	indane	88.1308	106.626	#N/A	18.4954	0
												247	fluoroethane	38.0762	44.6351	#N/A	6.55888	0
												248	1-fluoropropane	47.9161	57.7765	#N/A	9.86038	0
												249	2-fluoropropane	47.7011	56.5434	#N/A	8.84236	0
												250	1-fluorobutane	57.7559	70.9178	#N/A	13.1619	0
												251	1-fluoropentane	67.5958	84.0591	#N/A	16.4634	0
												252	fluorobenzene	63.2463	76.6524	#N/A	13.4062	0
												253	1,2-difluorobenzene	67.3653	81.0372	#N/A	13.6719	0
												254	1,3-difluorobenzene	67.3653	81.0372	#N/A	13.6719	0
												255	1,4-difluorobenzene	67.3653	81.0372	#N/A	13.6719	0
												256	o-fluorochlorobenzene	74.1339	91.4085	#N/A	17.2746	0
												257	m-fluorochlorobenzene	74.1339	91.4085	#N/A	17.2746	0
												258	p-fluorochlorobenzene	74.1339	91.4085	#N/A	17.2746	0
												259	3-fluorophenol	100.296	109.627	#N/A	9.33059	0
												260	4-fluorophenol	100.296	109.627	#N/A	9.33059	0
												261	fluoromethane	28.4514	32.7268	#N/A	4.27541	0
												262	cis-but-2-ene	56.1676	69.1879	#N/A	13.0204	0
												263	trans-but-2-ene	56.1676	69.1879	#N/A	13.0204	0
												264	2-methylbut-2-ene	66.0074	82.3293	#N/A	16.3219	0
												265	2,3-dimethylbut-2-ene	75.8472	95.4706	#N/A	19.6234	0
												266	2,2-dimethylpropane	59.039	79.0288	18.4846	19.9898	2.26552

## Sheet: 3 Solute Functional Groups
This sheet has the matrix for the training set of compounds and their associated substructure fragments. Columns G - BI list the number of substructure fragments present for each molecule.
			Solvent	C0	Lookup Column for Group Contribution
		Non-Polar Solvent	Benzene	0	21	7.26663	7.62663	6.82663	15.477	22.3036	6.82663	8.65035	8.18067	8.18067	10.8429	7.4566	16.3613	19.295	12.5806	28.4618	26.0722	23.7469	20.5137	20.5089	26.2586	30.9733	26.5392	24.4792	15.955	15.955	18.3862	6.6726	20.7228	6.6726	9.53512	6.82663	8.74561	21.1271	19.3696	17.7896	19.2343	5.2963	5.5763	5.8563	6.2763	6.8363	5.09058	4.4563	4.4563
		Water	Water	0	31	5.13492	6.30792	4.91992	13.324	18.2439	4.91992	8.4041	8.88592	8.88592	7.89188	5.16392	17.7718	28.0676	19.072	41.6632	42.0154	42.542	40.6046	33.0539	33.5848	50.5838	38.2578	42.3584	28.2311	28.2311	34.8301	3.03592	41.1722	3.03592	13.0466	4.91992	9.50703	27.1941	17.8178	12.7458	16.2756	6.83796	7.59796	8.35796	9.49796	11.018	6.27957	4.55796	4.55796
		Polar Solvent	Methanol	0.180796	65	7.8037	7.69415	6.57067	14.7916	21.3622	6.57067	8.2209	7.78438	7.78438	10.4899	7.31816	15.5688	23.9848	11.0847	34.1097	34.2607	31.1296	26.9856	27.0129	27.4567	44.2062	35.7375	31.975	17.4728	17.4728	21.1947	6.70791	29.269	6.70791	9.13492	6.57067	8.28914	19.8739	18.2525	17.1871	18.6604	4.81193	5.01087	5.21267	5.53118	6.02386	4.66578	4.20735	4.20735
					Group SMARTS pattern (SSIPs are primarily associated with the atoms in red)	[H]CF	[H]C(Cl)	[H]C	[H][C](C)=C	[H][C]([H])=C	[H][C](N)=O	C[C](C)=C	C[C](C)=O	C[C](N)=O	c[c]([H])c or n[c]([H])c	c[c](*)c or n[c]( *)c	C[C]#N	[H][N](C=O)C	C[N](C=O)C	[H]N([H])[H]	[H][N]([H])C	[H][N](C)C	C[N](C)C	[n]1ccccc1	C#[N]	[H][O][H]	[H][O]c1ccccc1	[H][O]C	C[O;R]C	C[O]R	lone pair electrons [O]=C(C)C	Pi electrons [O]=C(C)C	lone pair electrons [O]=C(N)	Pi electrons [O]=C(N)	[F]C([H])	[F]C(F)C(F)(F)	[F]c1ccccc1	C[S]C	[Cl]CC	[Cl]C(Cl)(Cl)Cl	[Cl]c1ccccc1	A1	A2	A3	A4	A5	A6	A7	A8
					Pattern ID	1	2	3	4	5	6	7	8	9	10	11	12	13	14	15	16	17	18	19	20	21	22	23	24	25	26	27	28	29	30	31	32	33	34	35	36	A1	A2	A3	A4	A5	A6	A7	A8
					Aromaticity	Aliphatic	Aliphatic	Aliphatic	Aliphatic	Aliphatic	Aliphatic	Aliphatic	Aliphatic	Aliphatic	Aromatic	Aromatic	Aliphatic	Aliphatic	Aliphatic	Aliphatic	Aliphatic	Aliphatic	Aliphatic	Aromatic	Aliphatic	Aliphatic	Aliphatic	Aliphatic	Aliphatic	Aliphatic	Aliphatic		Aliphatic		Aliphatic	Aliphatic	Aliphatic	Aliphatic	Aliphatic	Aliphatic	Aliphatic	Aromatic	Aromatic	Aromatic	Aromatic	Aromatic	Aromatic	Aromatic	Aromatic
					Hybridization	Csp3	Csp3	Csp3	Csp2 aliphatic	Csp2 aliphatic	Csp2 aliphatic	Csp2 aliphatic	Csp2 aliphatic	Csp2 aliphatic	Csp2 aromatic	Csp2 aromatic	Csp_C#N	Nsp3	Nsp3	Nsp3	Nsp3	Nsp3	Nsp3	Nsp2 aromatic	Nsp	Osp3	Osp3	Osp3	Osp3	Osp3	Osp2	Osp2	Osp2	Osp2	F	F	F	S	Cl	Cl	Cl
					Occurrence mols	6	8	231	13	11	5	2	15	15	61	60	5	6	9	1	10	8	6	12	5	1	12	36	4	6	15	15	15	15	6	0	9	7	9	1	11	2	10	4	1	3	7	1	1
					Occurrence Total	12	19	2997	15	12	5	3	15	15	297	145	5	6	9	1	10	8	6	12	5	1	12	36	4	6	15	15	15	15	6	0	12	7	11	4	16	6	22	8	2	6	48	2	2
					No of SSIPs	2	2	2	4	6	2	2	2	2	3	2	4	3	2	5	4	3	2	3	5	4	4	3	2	2	2	2	2	2	2	2	2	4	5	5	5	1	1	1	1	1	1	1	1
Count					Description	H attached to sp3 C also bonded to one F atom	H attached to sp3 C also bonded to one Cl atom	H attached to sp3 C	sp2 C with H attached	sp2 C with two H attached	H attached to sp2 C in a formamide	sp2 C with no attached H	sp2 C in a ketone	sp2 C in an amide	CH in benzene or pyridine ring	Quaternary aromatic sp2 C atom	sp C in nitrile	NH in secondary amide	N in tertiary amide	NH3 in ammonia	NH2 in primary amine	NH in secondary amine	N in tertiary amine	sp2 N in pyridine ring	sp N in nitrile	H2O water monomer	OH in a phenol	OH in alcohol	sp3 O in cyclic ether	sp3 O in acyclic dialkyl ether	lone pair on sp2 O in ketone	pi orbital electrons sp2 O in ketone	lone pair on sp2 O in amide	pi orbital electrons sp2 O in amide	Single F attached to sp3 C	F in perfluoroalkane (includes CF4)	F attached to benzene ring	S in dialkyl sulphide	Single Cl attached to sp3 C	Cl in tetrachloromethane	Cl attached to benzene ring	Default e.g Benzene	Mono alkyl e.g Toluene	di-alkyl e.g. xylenes	s-trialkyl e.g. mesitylene	poly-alkyl benzene (n=4,5 or6)	polycyclic aromatic	fluorobenzene	chlorobenzene
266					Subtotal Occurrence	12	19	2997	15	12	5	3	15	15	297	145	5	6	9	1	10	8	6	12	5	1	12	36	4	6	15	15	15	15	6	0	12	7	11	4	16	6	22	8	2	6	48	2	2
Count all					No of Alpha per group	1	1	1	1	2	1	0	2	2	1	0	4	1	0	3	2	1	0	0	0	2	1	1	0	0	0	0	0	0	1	1	1	0	2	2	2	0	0	0	0	0	0	0	0
266					No. of Beta per group	1	1	1	3	4	1	2	0	0	2	2	0	2	2	2	2	2	2	3	5	2	3	2	2	2	2	2	2	2	1	1	1	4	3	3	3	1	1	1	1	1	1	1	1
﻿Compound	SMILES	Compound Class	No of SSIPS		Molecule ID
n-pentane	CCCCC	Alkane-Acyclic Linear	24		1	0	0	12	0	0	0	0	0	0	0	0	0	0	0	0	0	0	0	0	0	0	0	0	0	0	0	0	0	0	0	0	0	0	0	0	0	0	0	0	0	0	0	0	0
n-hexane	CCCCCC	Alkane-Acyclic Linear	28		2	0	0	14	0	0	0	0	0	0	0	0	0	0	0	0	0	0	0	0	0	0	0	0	0	0	0	0	0	0	0	0	0	0	0	0	0	0	0	0	0	0	0	0	0
n-heptane	CCCCCCC	Alkane-Acyclic Linear	32		3	0	0	16	0	0	0	0	0	0	0	0	0	0	0	0	0	0	0	0	0	0	0	0	0	0	0	0	0	0	0	0	0	0	0	0	0	0	0	0	0	0	0	0	0
n-octane	CCCCCCCC	Alkane-Acyclic Linear	36		4	0	0	18	0	0	0	0	0	0	0	0	0	0	0	0	0	0	0	0	0	0	0	0	0	0	0	0	0	0	0	0	0	0	0	0	0	0	0	0	0	0	0	0	0
n-nonane	CCCCCCCCC	Alkane-Acyclic Linear	40		5	0	0	20	0	0	0	0	0	0	0	0	0	0	0	0	0	0	0	0	0	0	0	0	0	0	0	0	0	0	0	0	0	0	0	0	0	0	0	0	0	0	0	0	0
n-decane	CCCCCCCCCC	Alkane-Acyclic Linear	44		6	0	0	22	0	0	0	0	0	0	0	0	0	0	0	0	0	0	0	0	0	0	0	0	0	0	0	0	0	0	0	0	0	0	0	0	0	0	0	0	0	0	0	0	0
n-undecane	CCCCCCCCCCC	Alkane-Acyclic Linear	48		7	0	0	24	0	0	0	0	0	0	0	0	0	0	0	0	0	0	0	0	0	0	0	0	0	0	0	0	0	0	0	0	0	0	0	0	0	0	0	0	0	0	0	0	0
n-dodecane	CCCCCCCCCCCC	Alkane-Acyclic Linear	52		8	0	0	26	0	0	0	0	0	0	0	0	0	0	0	0	0	0	0	0	0	0	0	0	0	0	0	0	0	0	0	0	0	0	0	0	0	0	0	0	0	0	0	0	0
n-tridecane	CCCCCCCCCCCCC	Alkane-Acyclic Linear	56		9	0	0	28	0	0	0	0	0	0	0	0	0	0	0	0	0	0	0	0	0	0	0	0	0	0	0	0	0	0	0	0	0	0	0	0	0	0	0	0	0	0	0	0	0
n-tetradecane	CCCCCCCCCCCCCC	Alkane-Acyclic Linear	60		10	0	0	30	0	0	0	0	0	0	0	0	0	0	0	0	0	0	0	0	0	0	0	0	0	0	0	0	0	0	0	0	0	0	0	0	0	0	0	0	0	0	0	0	0
n-pentadecane	CCCCCCCCCCCCCCC	Alkane-Acyclic Linear	64		11	0	0	32	0	0	0	0	0	0	0	0	0	0	0	0	0	0	0	0	0	0	0	0	0	0	0	0	0	0	0	0	0	0	0	0	0	0	0	0	0	0	0	0	0
n-hexadecane	CCCCCCCCCCCCCCCC	Alkane-Acyclic Linear	68		12	0	0	34	0	0	0	0	0	0	0	0	0	0	0	0	0	0	0	0	0	0	0	0	0	0	0	0	0	0	0	0	0	0	0	0	0	0	0	0	0	0	0	0	0
isopentane	CCC(C)C	Alkane Acyclic Branched	24		13	0	0	12	0	0	0	0	0	0	0	0	0	0	0	0	0	0	0	0	0	0	0	0	0	0	0	0	0	0	0	0	0	0	0	0	0	0	0	0	0	0	0	0	0
2-methylpentane	CCCC(C)C	Alkane Acyclic Branched	28		14	0	0	14	0	0	0	0	0	0	0	0	0	0	0	0	0	0	0	0	0	0	0	0	0	0	0	0	0	0	0	0	0	0	0	0	0	0	0	0	0	0	0	0	0
3-methylpentane	CCC(C)CC	Alkane Acyclic Branched	28		15	0	0	14	0	0	0	0	0	0	0	0	0	0	0	0	0	0	0	0	0	0	0	0	0	0	0	0	0	0	0	0	0	0	0	0	0	0	0	0	0	0	0	0	0
3-methylhexane	CCCC(C)CC	Alkane Acyclic Branched	32		16	0	0	16	0	0	0	0	0	0	0	0	0	0	0	0	0	0	0	0	0	0	0	0	0	0	0	0	0	0	0	0	0	0	0	0	0	0	0	0	0	0	0	0	0
3-ethylpentane	CCC(CC)CC	Alkane Acyclic Branched	32		17	0	0	16	0	0	0	0	0	0	0	0	0	0	0	0	0	0	0	0	0	0	0	0	0	0	0	0	0	0	0	0	0	0	0	0	0	0	0	0	0	0	0	0	0
2,2-dimethylpentane	CCCC(C)(C)C	Alkane Acyclic Branched	32		18	0	0	16	0	0	0	0	0	0	0	0	0	0	0	0	0	0	0	0	0	0	0	0	0	0	0	0	0	0	0	0	0	0	0	0	0	0	0	0	0	0	0	0	0
3-methylheptane	CCCCC(C)CC	Alkane Acyclic Branched	36		19	0	0	18	0	0	0	0	0	0	0	0	0	0	0	0	0	0	0	0	0	0	0	0	0	0	0	0	0	0	0	0	0	0	0	0	0	0	0	0	0	0	0	0	0
4-methylheptane	CCCC(C)CCC	Alkane Acyclic Branched	36		20	0	0	18	0	0	0	0	0	0	0	0	0	0	0	0	0	0	0	0	0	0	0	0	0	0	0	0	0	0	0	0	0	0	0	0	0	0	0	0	0	0	0	0	0
3-ethylhexane	CCCC(CC)CC	Alkane Acyclic Branched	36		21	0	0	18	0	0	0	0	0	0	0	0	0	0	0	0	0	0	0	0	0	0	0	0	0	0	0	0	0	0	0	0	0	0	0	0	0	0	0	0	0	0	0	0	0
2,5-dimethylhexane	CC(C)CCC(C)C	Alkane Acyclic Branched	36		22	0	0	18	0	0	0	0	0	0	0	0	0	0	0	0	0	0	0	0	0	0	0	0	0	0	0	0	0	0	0	0	0	0	0	0	0	0	0	0	0	0	0	0	0
3,3-dimethylhexane	CCCC(C)(C)CC	Alkane Acyclic Branched	36		23	0	0	18	0	0	0	0	0	0	0	0	0	0	0	0	0	0	0	0	0	0	0	0	0	0	0	0	0	0	0	0	0	0	0	0	0	0	0	0	0	0	0	0	0
3,4-dimethylhexane	CCC(C)C(C)CC	Alkane Acyclic Branched	36		24	0	0	18	0	0	0	0	0	0	0	0	0	0	0	0	0	0	0	0	0	0	0	0	0	0	0	0	0	0	0	0	0	0	0	0	0	0	0	0	0	0	0	0	0
2-methyl-3-ethylpentane	CCC(CC)C(C)C	Alkane Acyclic Branched	36		25	0	0	18	0	0	0	0	0	0	0	0	0	0	0	0	0	0	0	0	0	0	0	0	0	0	0	0	0	0	0	0	0	0	0	0	0	0	0	0	0	0	0	0	0
3-methyl-3-ethylpentane	CCC(C)(CC)CC	Alkane Acyclic Branched	36		26	0	0	18	0	0	0	0	0	0	0	0	0	0	0	0	0	0	0	0	0	0	0	0	0	0	0	0	0	0	0	0	0	0	0	0	0	0	0	0	0	0	0	0	0
2,2,3-trimethylpentane	CCC(C)C(C)(C)C	Alkane iso-octane	36		27	0	0	18	0	0	0	0	0	0	0	0	0	0	0	0	0	0	0	0	0	0	0	0	0	0	0	0	0	0	0	0	0	0	0	0	0	0	0	0	0	0	0	0	0
2,2,4-trimethylpentane	CC(C)CC(C)(C)C	Alkane iso-octane	36		28	0	0	18	0	0	0	0	0	0	0	0	0	0	0	0	0	0	0	0	0	0	0	0	0	0	0	0	0	0	0	0	0	0	0	0	0	0	0	0	0	0	0	0	0
2,3,3-trimethylpentane	CCC(C)(C)C(C)C	Alkane iso-octane	36		29	0	0	18	0	0	0	0	0	0	0	0	0	0	0	0	0	0	0	0	0	0	0	0	0	0	0	0	0	0	0	0	0	0	0	0	0	0	0	0	0	0	0	0	0
2,3,4-trimethylpentane	CC(C)C(C)C(C)C	Alkane iso-octane	36		30	0	0	18	0	0	0	0	0	0	0	0	0	0	0	0	0	0	0	0	0	0	0	0	0	0	0	0	0	0	0	0	0	0	0	0	0	0	0	0	0	0	0	0	0
2,2,3,3-tetramethylbutane	CC(C)(C)C(C)(C)C	Alkane Acyclic Branched	36		31	0	0	18	0	0	0	0	0	0	0	0	0	0	0	0	0	0	0	0	0	0	0	0	0	0	0	0	0	0	0	0	0	0	0	0	0	0	0	0	0	0	0	0	0
2-methyloctane	CCCCCCC(C)C	Alkane Acyclic Branched	40		32	0	0	20	0	0	0	0	0	0	0	0	0	0	0	0	0	0	0	0	0	0	0	0	0	0	0	0	0	0	0	0	0	0	0	0	0	0	0	0	0	0	0	0	0
2,2,5-trimethylhexane	CC(C)CCC(C)(C)C	Alkane Acyclic Branched	40		33	0	0	20	0	0	0	0	0	0	0	0	0	0	0	0	0	0	0	0	0	0	0	0	0	0	0	0	0	0	0	0	0	0	0	0	0	0	0	0	0	0	0	0	0
3,3-diethylpentane	CCC(CC)(CC)CC	Alkane Acyclic Branched	40		34	0	0	20	0	0	0	0	0	0	0	0	0	0	0	0	0	0	0	0	0	0	0	0	0	0	0	0	0	0	0	0	0	0	0	0	0	0	0	0	0	0	0	0	0
2,2,4,4-tetramethylpentane	CC(C)(C)CC(C)(C)C	Alkane Acyclic Branched	40		35	0	0	20	0	0	0	0	0	0	0	0	0	0	0	0	0	0	0	0	0	0	0	0	0	0	0	0	0	0	0	0	0	0	0	0	0	0	0	0	0	0	0	0	0
2-methylnonane	CCCCCCCC(C)C	Alkane Acyclic Branched	44		36	0	0	22	0	0	0	0	0	0	0	0	0	0	0	0	0	0	0	0	0	0	0	0	0	0	0	0	0	0	0	0	0	0	0	0	0	0	0	0	0	0	0	0	0
cyclopentane	C1CCCC1	Alkane-Cyclic	20		37	0	0	10	0	0	0	0	0	0	0	0	0	0	0	0	0	0	0	0	0	0	0	0	0	0	0	0	0	0	0	0	0	0	0	0	0	0	0	0	0	0	0	0	0
cyclohexane	C1CCCCC1	Alkane-Cyclic	24		38	0	0	12	0	0	0	0	0	0	0	0	0	0	0	0	0	0	0	0	0	0	0	0	0	0	0	0	0	0	0	0	0	0	0	0	0	0	0	0	0	0	0	0	0
cycloheptane	C1CCCCCC1	Alkane-Cyclic	28		39	0	0	14	0	0	0	0	0	0	0	0	0	0	0	0	0	0	0	0	0	0	0	0	0	0	0	0	0	0	0	0	0	0	0	0	0	0	0	0	0	0	0	0	0
cyclooctane	C1CCCCCCC1	Alkane-Cyclic	32		40	0	0	16	0	0	0	0	0	0	0	0	0	0	0	0	0	0	0	0	0	0	0	0	0	0	0	0	0	0	0	0	0	0	0	0	0	0	0	0	0	0	0	0	0
cis-decahydronaphthalene	C1CCC2CCCCC2C1	Alkane-Cyclic	36		41	0	0	18	0	0	0	0	0	0	0	0	0	0	0	0	0	0	0	0	0	0	0	0	0	0	0	0	0	0	0	0	0	0	0	0	0	0	0	0	0	0	0	0	0
trans-decahydronaphtalene	C1CCCC2([H])CCCCC12[H]	Alkane-Cyclic	36		42	0	0	18	0	0	0	0	0	0	0	0	0	0	0	0	0	0	0	0	0	0	0	0	0	0	0	0	0	0	0	0	0	0	0	0	0	0	0	0	0	0	0	0	0
methylcyclopentane	CC1CCCC1	Alkane-Cyclic Branched	24		43	0	0	12	0	0	0	0	0	0	0	0	0	0	0	0	0	0	0	0	0	0	0	0	0	0	0	0	0	0	0	0	0	0	0	0	0	0	0	0	0	0	0	0	0
methylcyclohexane	CC1CCCCC1	Alkane-Cyclic Branched	28		44	0	0	14	0	0	0	0	0	0	0	0	0	0	0	0	0	0	0	0	0	0	0	0	0	0	0	0	0	0	0	0	0	0	0	0	0	0	0	0	0	0	0	0	0
ethylcyclohexane	CCC1CCCCC1	Alkane-Cyclic Branched	32		45	0	0	16	0	0	0	0	0	0	0	0	0	0	0	0	0	0	0	0	0	0	0	0	0	0	0	0	0	0	0	0	0	0	0	0	0	0	0	0	0	0	0	0	0
cis-1,2-dimethylcyclohexane	C[C@@H]1([C@@H](CCCC1)(C))	Alkane-Cyclic Branched	32		46	0	0	16	0	0	0	0	0	0	0	0	0	0	0	0	0	0	0	0	0	0	0	0	0	0	0	0	0	0	0	0	0	0	0	0	0	0	0	0	0	0	0	0	0
trans-1,4-dimethylcyclohexane	CC1CCC(C)CC1	Alkane-Cyclic Branched	32		47	0	0	16	0	0	0	0	0	0	0	0	0	0	0	0	0	0	0	0	0	0	0	0	0	0	0	0	0	0	0	0	0	0	0	0	0	0	0	0	0	0	0	0	0
tetrachloromethane	[Cl]C([Cl])([Cl])[Cl]	Chlorosolvent-CCl4	20		48	0	0	0	0	0	0	0	0	0	0	0	0	0	0	0	0	0	0	0	0	0	0	0	0	0	0	0	0	0	0	0	0	0	0	4	0	0	0	0	0	0	0	0	0
benzene	c1ccccc1	Benzene	20		49	0	0	0	0	0	0	0	0	0	6	0	0	0	0	0	0	0	0	0	0	0	0	0	0	0	0	0	0	0	0	0	0	0	0	0	0	2	0	0	0	0	0	0	0
water	O([H])[H]	Water	4		50	0	0	0	0	0	0	0	0	0	0	0	0	0	0	0	0	0	0	0	0	1	0	0	0	0	0	0	0	0	0	0	0	0	0	0	0	0	0	0	0	0	0	0	0
methanol	CO	Alcohol-Methanol	9		51	0	0	3	0	0	0	0	0	0	0	0	0	0	0	0	0	0	0	0	0	0	0	1	0	0	0	0	0	0	0	0	0	0	0	0	0	0	0	0	0	0	0	0	0
ethanol	CCO	Alcohol-Primary	13		52	0	0	5	0	0	0	0	0	0	0	0	0	0	0	0	0	0	0	0	0	0	0	1	0	0	0	0	0	0	0	0	0	0	0	0	0	0	0	0	0	0	0	0	0
propan-1-ol	CCCO	Alcohol-Primary	17		53	0	0	7	0	0	0	0	0	0	0	0	0	0	0	0	0	0	0	0	0	0	0	1	0	0	0	0	0	0	0	0	0	0	0	0	0	0	0	0	0	0	0	0	0
butan-1-ol	CCCCO	Alcohol-Primary	21		54	0	0	9	0	0	0	0	0	0	0	0	0	0	0	0	0	0	0	0	0	0	0	1	0	0	0	0	0	0	0	0	0	0	0	0	0	0	0	0	0	0	0	0	0
pentan-1-ol	CCCCCO	Alcohol-Primary	25		55	0	0	11	0	0	0	0	0	0	0	0	0	0	0	0	0	0	0	0	0	0	0	1	0	0	0	0	0	0	0	0	0	0	0	0	0	0	0	0	0	0	0	0	0
hexan-1-ol	CCCCCCO	Alcohol-Primary	29		56	0	0	13	0	0	0	0	0	0	0	0	0	0	0	0	0	0	0	0	0	0	0	1	0	0	0	0	0	0	0	0	0	0	0	0	0	0	0	0	0	0	0	0	0
heptan-1-ol	CCCCCCCO	Alcohol-Primary	33		57	0	0	15	0	0	0	0	0	0	0	0	0	0	0	0	0	0	0	0	0	0	0	1	0	0	0	0	0	0	0	0	0	0	0	0	0	0	0	0	0	0	0	0	0
octan-1-ol	CCCCCCCCO	Alcohol-Primary	37		58	0	0	17	0	0	0	0	0	0	0	0	0	0	0	0	0	0	0	0	0	0	0	1	0	0	0	0	0	0	0	0	0	0	0	0	0	0	0	0	0	0	0	0	0
nonan-1-ol	CCCCCCCCCO	Alcohol-Primary	41		59	0	0	19	0	0	0	0	0	0	0	0	0	0	0	0	0	0	0	0	0	0	0	1	0	0	0	0	0	0	0	0	0	0	0	0	0	0	0	0	0	0	0	0	0
decan-1-ol	CCCCCCCCCCO	Alcohol-Primary	45		60	0	0	21	0	0	0	0	0	0	0	0	0	0	0	0	0	0	0	0	0	0	0	1	0	0	0	0	0	0	0	0	0	0	0	0	0	0	0	0	0	0	0	0	0
dimethylether	COC	Ether-Dimethyl	14		61	0	0	6	0	0	0	0	0	0	0	0	0	0	0	0	0	0	0	0	0	0	0	0	0	1	0	0	0	0	0	0	0	0	0	0	0	0	0	0	0	0	0	0	0
diethyl ether	CCOCC	Ether-Dialkyl	22		62	0	0	10	0	0	0	0	0	0	0	0	0	0	0	0	0	0	0	0	0	0	0	0	0	1	0	0	0	0	0	0	0	0	0	0	0	0	0	0	0	0	0	0	0
dipropylether	CCCOCCC	Ether-Dialkyl	30		63	0	0	14	0	0	0	0	0	0	0	0	0	0	0	0	0	0	0	0	0	0	0	0	0	1	0	0	0	0	0	0	0	0	0	0	0	0	0	0	0	0	0	0	0
dibutylether	CCCCOCCCC	Ether-Dialkyl	38		64	0	0	18	0	0	0	0	0	0	0	0	0	0	0	0	0	0	0	0	0	0	0	0	0	1	0	0	0	0	0	0	0	0	0	0	0	0	0	0	0	0	0	0	0
dipentylether	CCCCCOCCCCC	Ether-Dialkyl	46		65	0	0	22	0	0	0	0	0	0	0	0	0	0	0	0	0	0	0	0	0	0	0	0	0	1	0	0	0	0	0	0	0	0	0	0	0	0	0	0	0	0	0	0	0
dihexylether	CCCCCCOCCCCCC	Ether-Dialkyl	54		66	0	0	26	0	0	0	0	0	0	0	0	0	0	0	0	0	0	0	0	0	0	0	0	0	1	0	0	0	0	0	0	0	0	0	0	0	0	0	0	0	0	0	0	0
chlorobenzene	[Cl]c1ccccc1	Benzene-Chloro	24		67	0	0	0	0	0	0	0	0	0	5	1	0	0	0	0	0	0	0	0	0	0	0	0	0	0	0	0	0	0	0	0	0	0	0	0	1	0	0	0	0	0	0	0	2
1,2-dichlorobenzene	[Cl]c1ccccc1[Cl]	Benzene-Dichloro	28		68	0	0	0	0	0	0	0	0	0	4	2	0	0	0	0	0	0	0	0	0	0	0	0	0	0	0	0	0	0	0	0	0	0	0	0	2	0	0	0	0	0	0	0	0
1,2-dichloroethane	[Cl]CC[Cl]	Chlorosolvent-CH2ClCH2Cl	18		69	0	4	0	0	0	0	0	0	0	0	0	0	0	0	0	0	0	0	0	0	0	0	0	0	0	0	0	0	0	0	0	0	0	2	0	0	0	0	0	0	0	0	0	0
methane	C	Alkane-Methane	8		70	0	0	4	0	0	0	0	0	0	0	0	0	0	0	0	0	0	0	0	0	0	0	0	0	0	0	0	0	0	0	0	0	0	0	0	0	0	0	0	0	0	0	0	0
ethane	CC	Alkane-Acyclic Linear	12		71	0	0	6	0	0	0	0	0	0	0	0	0	0	0	0	0	0	0	0	0	0	0	0	0	0	0	0	0	0	0	0	0	0	0	0	0	0	0	0	0	0	0	0	0
propane	CCC	Alkane-Acyclic Linear	16		72	0	0	8	0	0	0	0	0	0	0	0	0	0	0	0	0	0	0	0	0	0	0	0	0	0	0	0	0	0	0	0	0	0	0	0	0	0	0	0	0	0	0	0	0
butane	CCCC	Alkane-Acyclic Linear	20		73	0	0	10	0	0	0	0	0	0	0	0	0	0	0	0	0	0	0	0	0	0	0	0	0	0	0	0	0	0	0	0	0	0	0	0	0	0	0	0	0	0	0	0	0
trimethylamine	CN(C)C	Amine-Tertiary	20		74	0	0	9	0	0	0	0	0	0	0	0	0	0	0	0	0	0	1	0	0	0	0	0	0	0	0	0	0	0	0	0	0	0	0	0	0	0	0	0	0	0	0	0	0
triethylamine	CCN(CC)CC	Amine-Tertiary	32		75	0	0	15	0	0	0	0	0	0	0	0	0	0	0	0	0	0	1	0	0	0	0	0	0	0	0	0	0	0	0	0	0	0	0	0	0	0	0	0	0	0	0	0	0
tripropylamine	CCCN(CCC)CCC	Amine-Tertiary	44		76	0	0	21	0	0	0	0	0	0	0	0	0	0	0	0	0	0	1	0	0	0	0	0	0	0	0	0	0	0	0	0	0	0	0	0	0	0	0	0	0	0	0	0	0
tributylamine	CCCCN(CCCC)CCCC	Amine-Tertiary	56		77	0	0	27	0	0	0	0	0	0	0	0	0	0	0	0	0	0	1	0	0	0	0	0	0	0	0	0	0	0	0	0	0	0	0	0	0	0	0	0	0	0	0	0	0
piperidine	C1CCNCC1	Amine-Secondary Cyclic	23		78	0	0	10	0	0	0	0	0	0	0	0	0	0	0	0	0	1	0	0	0	0	0	0	0	0	0	0	0	0	0	0	0	0	0	0	0	0	0	0	0	0	0	0	0
diethylamine	CCNCC	Amine-Secondary	23		79	0	0	10	0	0	0	0	0	0	0	0	0	0	0	0	0	1	0	0	0	0	0	0	0	0	0	0	0	0	0	0	0	0	0	0	0	0	0	0	0	0	0	0	0
dipropylamine	CCCNCCC	Amine-Secondary	31		80	0	0	14	0	0	0	0	0	0	0	0	0	0	0	0	0	1	0	0	0	0	0	0	0	0	0	0	0	0	0	0	0	0	0	0	0	0	0	0	0	0	0	0	0
dibutylamine	CCCCNCCCC	Amine-Secondary	39		81	0	0	18	0	0	0	0	0	0	0	0	0	0	0	0	0	1	0	0	0	0	0	0	0	0	0	0	0	0	0	0	0	0	0	0	0	0	0	0	0	0	0	0	0
methylamine	CN	Amine-Primary	10		82	0	0	3	0	0	0	0	0	0	0	0	0	0	0	0	1	0	0	0	0	0	0	0	0	0	0	0	0	0	0	0	0	0	0	0	0	0	0	0	0	0	0	0	0
ethylamine	CCN	Amine-Primary	14		83	0	0	5	0	0	0	0	0	0	0	0	0	0	0	0	1	0	0	0	0	0	0	0	0	0	0	0	0	0	0	0	0	0	0	0	0	0	0	0	0	0	0	0	0
n-propylamine	CCCN	Amine-Primary	18		84	0	0	7	0	0	0	0	0	0	0	0	0	0	0	0	1	0	0	0	0	0	0	0	0	0	0	0	0	0	0	0	0	0	0	0	0	0	0	0	0	0	0	0	0
n-butylamine	CCCCN	Amine-Primary	22		85	0	0	9	0	0	0	0	0	0	0	0	0	0	0	0	1	0	0	0	0	0	0	0	0	0	0	0	0	0	0	0	0	0	0	0	0	0	0	0	0	0	0	0	0
pentylamine	CCCCCN	Amine-Primary	26		86	0	0	11	0	0	0	0	0	0	0	0	0	0	0	0	1	0	0	0	0	0	0	0	0	0	0	0	0	0	0	0	0	0	0	0	0	0	0	0	0	0	0	0	0
hexylamine	CCCCCCN	Amine-Primary	30		87	0	0	13	0	0	0	0	0	0	0	0	0	0	0	0	1	0	0	0	0	0	0	0	0	0	0	0	0	0	0	0	0	0	0	0	0	0	0	0	0	0	0	0	0
heptylamine	CCCCCCCN	Amine-Primary	34		88	0	0	15	0	0	0	0	0	0	0	0	0	0	0	0	1	0	0	0	0	0	0	0	0	0	0	0	0	0	0	0	0	0	0	0	0	0	0	0	0	0	0	0	0
n-octylamine	CCCCCCCCN	Amine-Primary	38		89	0	0	17	0	0	0	0	0	0	0	0	0	0	0	0	1	0	0	0	0	0	0	0	0	0	0	0	0	0	0	0	0	0	0	0	0	0	0	0	0	0	0	0	0
nonylamine	CCCCCCCCCN	Amine-Primary	42		90	0	0	19	0	0	0	0	0	0	0	0	0	0	0	0	1	0	0	0	0	0	0	0	0	0	0	0	0	0	0	0	0	0	0	0	0	0	0	0	0	0	0	0	0
c-hexylamine	NC1CCCCC1	Amine-Primary	26		91	0	0	11	0	0	0	0	0	0	0	0	0	0	0	0	1	0	0	0	0	0	0	0	0	0	0	0	0	0	0	0	0	0	0	0	0	0	0	0	0	0	0	0	0
chlorocyclohexane	[Cl]C1CCCCC1	Alkane-Monochloro	27		92	0	1	10	0	0	0	0	0	0	0	0	0	0	0	0	0	0	0	0	0	0	0	0	0	0	0	0	0	0	0	0	0	0	1	0	0	0	0	0	0	0	0	0	0
ethyl benzene	CCc1ccccc1	Benzene-Alkyl Substituted	29		93	0	0	5	0	0	0	0	0	0	5	1	0	0	0	0	0	0	0	0	0	0	0	0	0	0	0	0	0	0	0	0	0	0	0	0	0	0	2	0	0	0	0	0	0
decyl benzene	CCCCCCCCCCc1ccccc1	Benzene-Alkyl Substituted	61		94	0	0	21	0	0	0	0	0	0	5	1	0	0	0	0	0	0	0	0	0	0	0	0	0	0	0	0	0	0	0	0	0	0	0	0	0	0	2	0	0	0	0	0	0
toluene	Cc1ccccc1	Benzene-Methyl substituted	25		95	0	0	3	0	0	0	0	0	0	5	1	0	0	0	0	0	0	0	0	0	0	0	0	0	0	0	0	0	0	0	0	0	0	0	0	0	0	2	0	0	0	0	0	0
o-xylene	Cc1ccccc1C	Benzene-Methyl substituted	30		96	0	0	6	0	0	0	0	0	0	4	2	0	0	0	0	0	0	0	0	0	0	0	0	0	0	0	0	0	0	0	0	0	0	0	0	0	0	0	2	0	0	0	0	0
m-xylene	Cc1cccc(C)c1	Benzene-Methyl substituted	30		97	0	0	6	0	0	0	0	0	0	4	2	0	0	0	0	0	0	0	0	0	0	0	0	0	0	0	0	0	0	0	0	0	0	0	0	0	0	0	2	0	0	0	0	0
p-xylene	Cc1ccc(C)cc1	Benzene-Methyl substituted	30		98	0	0	6	0	0	0	0	0	0	4	2	0	0	0	0	0	0	0	0	0	0	0	0	0	0	0	0	0	0	0	0	0	0	0	0	0	0	0	2	0	0	0	0	0
mesitylene	Cc1cc(C)cc(C)c1	Benzene-Methyl substituted	35		99	0	0	9	0	0	0	0	0	0	3	3	0	0	0	0	0	0	0	0	0	0	0	0	0	0	0	0	0	0	0	0	0	0	0	0	0	0	0	0	2	0	0	0	0
1,2,4,5-tetramethylbenzene	Cc1cc(C)c(C)cc1C	Benzene-Methyl substituted	40		100	0	0	12	0	0	0	0	0	0	2	4	0	0	0	0	0	0	0	0	0	0	0	0	0	0	0	0	0	0	0	0	0	0	0	0	0	0	0	0	0	2	0	0	0
hexamethylbenzene	Cc1c(C)c(C)c(C)c(C)c1C	Benzene-Methyl substituted	50		101	0	0	18	0	0	0	0	0	0	0	6	0	0	0	0	0	0	0	0	0	0	0	0	0	0	0	0	0	0	0	0	0	0	0	0	0	0	0	0	0	2	0	0	0
pentamethylbenzene	Cc1cc(C)c(C)c(C)c1C	Benzene-Methyl substituted	45		102	0	0	15	0	0	0	0	0	0	1	5	0	0	0	0	0	0	0	0	0	0	0	0	0	0	0	0	0	0	0	0	0	0	0	0	0	0	0	0	0	2	0	0	0
propanone	CC(C)=O	Ketone-Dialkyl	18		103	0	0	6	0	0	0	0	1	0	0	0	0	0	0	0	0	0	0	0	0	0	0	0	0	0	1	1	0	0	0	0	0	0	0	0	0	0	0	0	0	0	0	0	0
butanone	CCC(C)=O	Ketone-Dialkyl	22		104	0	0	8	0	0	0	0	1	0	0	0	0	0	0	0	0	0	0	0	0	0	0	0	0	0	1	1	0	0	0	0	0	0	0	0	0	0	0	0	0	0	0	0	0
pentan-2-one	CCCC(C)=O	Ketone-Dialkyl	26		105	0	0	10	0	0	0	0	1	0	0	0	0	0	0	0	0	0	0	0	0	0	0	0	0	0	1	1	0	0	0	0	0	0	0	0	0	0	0	0	0	0	0	0	0
pentan-3-one	CCC(=O)CC	Ketone-Dialkyl	26		106	0	0	10	0	0	0	0	1	0	0	0	0	0	0	0	0	0	0	0	0	0	0	0	0	0	1	1	0	0	0	0	0	0	0	0	0	0	0	0	0	0	0	0	0
hexan-2-one	CCCCC(C)=O	Ketone-Dialkyl	30		107	0	0	12	0	0	0	0	1	0	0	0	0	0	0	0	0	0	0	0	0	0	0	0	0	0	1	1	0	0	0	0	0	0	0	0	0	0	0	0	0	0	0	0	0
hexan-3-one	CCCC(=O)CC	Ketone-Dialkyl	30		108	0	0	12	0	0	0	0	1	0	0	0	0	0	0	0	0	0	0	0	0	0	0	0	0	0	1	1	0	0	0	0	0	0	0	0	0	0	0	0	0	0	0	0	0
heptan-4-one	CCCC(=O)CCC	Ketone-Dialkyl	34		109	0	0	14	0	0	0	0	1	0	0	0	0	0	0	0	0	0	0	0	0	0	0	0	0	0	1	1	0	0	0	0	0	0	0	0	0	0	0	0	0	0	0	0	0
4-methylpentan-2-one	CC(C)CC(C)=O	Ketone-Dialkyl	30		110	0	0	12	0	0	0	0	1	0	0	0	0	0	0	0	0	0	0	0	0	0	0	0	0	0	1	1	0	0	0	0	0	0	0	0	0	0	0	0	0	0	0	0	0
undecan-6-one	CCCCCC(=O)CCCCC	Ketone-Dialkyl	50		111	0	0	22	0	0	0	0	1	0	0	0	0	0	0	0	0	0	0	0	0	0	0	0	0	0	1	1	0	0	0	0	0	0	0	0	0	0	0	0	0	0	0	0	0
cyclopentanone	O=C1CCCC1	Ketone-Cycloalkyl	22		112	0	0	8	0	0	0	0	1	0	0	0	0	0	0	0	0	0	0	0	0	0	0	0	0	0	1	1	0	0	0	0	0	0	0	0	0	0	0	0	0	0	0	0	0
cyclohexanone	O=C1CCCCC1	Ketone-Cycloalkyl	26		113	0	0	10	0	0	0	0	1	0	0	0	0	0	0	0	0	0	0	0	0	0	0	0	0	0	1	1	0	0	0	0	0	0	0	0	0	0	0	0	0	0	0	0	0
cycloheptanone	O=C1CCCCCC1	Ketone-Cycloalkyl	30		114	0	0	12	0	0	0	0	1	0	0	0	0	0	0	0	0	0	0	0	0	0	0	0	0	0	1	1	0	0	0	0	0	0	0	0	0	0	0	0	0	0	0	0	0
cyclooctanone	O=C1CCCCCCC1	Ketone-Cycloalkyl	34		115	0	0	14	0	0	0	0	1	0	0	0	0	0	0	0	0	0	0	0	0	0	0	0	0	0	1	1	0	0	0	0	0	0	0	0	0	0	0	0	0	0	0	0	0
phenol	Oc1ccccc1	Phenol	23		116	0	0	0	0	0	0	0	0	0	5	1	0	0	0	0	0	0	0	0	0	0	1	0	0	0	0	0	0	0	0	0	0	0	0	0	0	0	0	0	0	0	0	0	0
3-methylphenol	Cc1cccc(O)c1	Phenol-methyl substituted	28		117	0	0	3	0	0	0	0	0	0	4	2	0	0	0	0	0	0	0	0	0	0	1	0	0	0	0	0	0	0	0	0	0	0	0	0	0	0	0	0	0	0	0	0	0
4-methylphenol	Cc1ccc(O)cc1	Phenol-methyl substituted	28		118	0	0	3	0	0	0	0	0	0	4	2	0	0	0	0	0	0	0	0	0	0	1	0	0	0	0	0	0	0	0	0	0	0	0	0	0	0	0	0	0	0	0	0	0
3,4-dimethylphenol	Cc1ccc(O)cc1C	Phenol-methyl substituted	33		119	0	0	6	0	0	0	0	0	0	3	3	0	0	0	0	0	0	0	0	0	0	1	0	0	0	0	0	0	0	0	0	0	0	0	0	0	0	0	0	0	0	0	0	0
3,5-dimethylphenol	Cc1cc(C)cc(O)c1	Phenol-methyl substituted	33		120	0	0	6	0	0	0	0	0	0	3	3	0	0	0	0	0	0	0	0	0	0	1	0	0	0	0	0	0	0	0	0	0	0	0	0	0	0	0	0	0	0	0	0	0
3-chlorophenol	Oc1cccc([Cl])c1	Phenol-Chloro substituted	27		121	0	0	0	0	0	0	0	0	0	4	2	0	0	0	0	0	0	0	0	0	0	1	0	0	0	0	0	0	0	0	0	0	0	0	0	1	0	0	0	0	0	0	0	0
4-chlorophenol	Oc1ccc([Cl])cc1	Phenol-Chloro substituted	27		122	0	0	0	0	0	0	0	0	0	4	2	0	0	0	0	0	0	0	0	0	0	1	0	0	0	0	0	0	0	0	0	0	0	0	0	1	0	0	0	0	0	0	0	0
3,4-dichlorophenol	Oc1ccc([Cl])c([Cl])c1	Phenol-Chloro substituted	31		123	0	0	0	0	0	0	0	0	0	3	3	0	0	0	0	0	0	0	0	0	0	1	0	0	0	0	0	0	0	0	0	0	0	0	0	2	0	0	0	0	0	0	0	0
3,5-dichlorophenol	Oc1cc([Cl])cc([Cl])c1	Phenol-Chloro substituted	31		124	0	0	0	0	0	0	0	0	0	3	3	0	0	0	0	0	0	0	0	0	0	1	0	0	0	0	0	0	0	0	0	0	0	0	0	2	0	0	0	0	0	0	0	0
chloroethane	[Cl]CC	Alkane-Monochloro	15		125	0	2	3	0	0	0	0	0	0	0	0	0	0	0	0	0	0	0	0	0	0	0	0	0	0	0	0	0	0	0	0	0	0	1	0	0	0	0	0	0	0	0	0	0
1-chloropropane	CCC[Cl]	Alkane-Monochloro	19		126	0	2	5	0	0	0	0	0	0	0	0	0	0	0	0	0	0	0	0	0	0	0	0	0	0	0	0	0	0	0	0	0	0	1	0	0	0	0	0	0	0	0	0	0
1-chlorobutane	CCCC[Cl]	Alkane-Monochloro	23		127	0	2	7	0	0	0	0	0	0	0	0	0	0	0	0	0	0	0	0	0	0	0	0	0	0	0	0	0	0	0	0	0	0	1	0	0	0	0	0	0	0	0	0	0
1,3-dichloropropane	[Cl]CCC[Cl]	Alkane-Dichloro	22		128	0	4	2	0	0	0	0	0	0	0	0	0	0	0	0	0	0	0	0	0	0	0	0	0	0	0	0	0	0	0	0	0	0	2	0	0	0	0	0	0	0	0	0	0
1-chloropentane	CCCCC[Cl]	Alkane-Monochloro	27		129	0	2	9	0	0	0	0	0	0	0	0	0	0	0	0	0	0	0	0	0	0	0	0	0	0	0	0	0	0	0	0	0	0	1	0	0	0	0	0	0	0	0	0	0
1-chloroheptane	CCCCCCC[Cl]	Alkane-Monochloro	35		130	0	2	13	0	0	0	0	0	0	0	0	0	0	0	0	0	0	0	0	0	0	0	0	0	0	0	0	0	0	0	0	0	0	1	0	0	0	0	0	0	0	0	0	0
naphthalene	c1ccc2ccccc2c1	Polycyclic aromatic	32		131	0	0	0	0	0	0	0	0	0	8	2	0	0	0	0	0	0	0	0	0	0	0	0	0	0	0	0	0	0	0	0	0	0	0	0	0	0	0	0	0	0	4	0	0
phenanthrene	c1ccc2c(c1)ccc3ccccc23	Polycyclic aromatic	44		132	0	0	0	0	0	0	0	0	0	10	4	0	0	0	0	0	0	0	0	0	0	0	0	0	0	0	0	0	0	0	0	0	0	0	0	0	0	0	0	0	0	6	0	0
﻿anthracene	c1ccc2cc3ccccc3cc2c1	Polycyclic aromatic	44		133	0	0	0	0	0	0	0	0	0	10	4	0	0	0	0	0	0	0	0	0	0	0	0	0	0	0	0	0	0	0	0	0	0	0	0	0	0	0	0	0	0	6	0	0
pyrene	c1cc2ccc3cccc4ccc(c1)c2c34	Polycyclic aromatic	50		134	0	0	0	0	0	0	0	0	0	10	6	0	0	0	0	0	0	0	0	0	0	0	0	0	0	0	0	0	0	0	0	0	0	0	0	0	0	0	0	0	0	8	0	0
pyridine	c1ccncc1	Pyridine	20		135	0	0	0	0	0	0	0	0	0	5	0	0	0	0	0	0	0	0	1	0	0	0	0	0	0	0	0	0	0	0	0	0	0	0	0	0	0	0	0	0	0	0	0	0
acetonitrile	CC#N	Nitrile	15		136	0	0	3	0	0	0	0	0	0	0	0	1	0	0	0	0	0	0	0	1	0	0	0	0	0	0	0	0	0	0	0	0	0	0	0	0	0	0	0	0	0	0	0	0
proprionitrile	CCC#N	Nitrile	19		137	0	0	5	0	0	0	0	0	0	0	0	1	0	0	0	0	0	0	0	1	0	0	0	0	0	0	0	0	0	0	0	0	0	0	0	0	0	0	0	0	0	0	0	0
1-cyanopropane	CCCC#N	Nitrile	23		138	0	0	7	0	0	0	0	0	0	0	0	1	0	0	0	0	0	0	0	1	0	0	0	0	0	0	0	0	0	0	0	0	0	0	0	0	0	0	0	0	0	0	0	0
1-cyanobutane	CCCCC#N	Nitrile	27		139	0	0	9	0	0	0	0	0	0	0	0	1	0	0	0	0	0	0	0	1	0	0	0	0	0	0	0	0	0	0	0	0	0	0	0	0	0	0	0	0	0	0	0	0
1-cyanopentane	CCCCCC#N	Nitrile	31		140	0	0	11	0	0	0	0	0	0	0	0	1	0	0	0	0	0	0	0	1	0	0	0	0	0	0	0	0	0	0	0	0	0	0	0	0	0	0	0	0	0	0	0	0
biphenyl	c1ccc(cc1)c1ccccc1	Benzene-Biphenyl	38		141	0	0	0	0	0	0	0	0	0	10	2	0	0	0	0	0	0	0	0	0	0	0	0	0	0	0	0	0	0	0	0	0	0	0	0	0	4	0	0	0	0	0	0	0
ammonia	N	Amine-NH3	5		142	0	0	0	0	0	0	0	0	0	0	0	0	0	0	1	0	0	0	0	0	0	0	0	0	0	0	0	0	0	0	0	0	0	0	0	0	0	0	0	0	0	0	0	0
t-butyl chloride	CC(C)(C)[Cl]	Alkane-Monochloro	23		143	0	0	9	0	0	0	0	0	0	0	0	0	0	0	0	0	0	0	0	0	0	0	0	0	0	0	0	0	0	0	0	0	0	1	0	0	0	0	0	0	0	0	0	0
tetrahydropyran	C1CCOCC1	Ether cyclic	22		144	0	0	10	0	0	0	0	0	0	0	0	0	0	0	0	0	0	0	0	0	0	0	0	1	0	0	0	0	0	0	0	0	0	0	0	0	0	0	0	0	0	0	0	0
tetrahydrofuran	C1CCOC1	Ether cyclic	18		145	0	0	8	0	0	0	0	0	0	0	0	0	0	0	0	0	0	0	0	0	0	0	0	1	0	0	0	0	0	0	0	0	0	0	0	0	0	0	0	0	0	0	0	0
tetrahydrothiophene	C1CCSC1	Sulfide-cycloalkyl	20		146	0	0	8	0	0	0	0	0	0	0	0	0	0	0	0	0	0	0	0	0	0	0	0	0	0	0	0	0	0	0	0	0	1	0	0	0	0	0	0	0	0	0	0	0
pentamethylene sulfide	S1CCCCC1	Sulfide-cycloalkyl	24		147	0	0	10	0	0	0	0	0	0	0	0	0	0	0	0	0	0	0	0	0	0	0	0	0	0	0	0	0	0	0	0	0	1	0	0	0	0	0	0	0	0	0	0	0
4-ethylphenol	CCc1ccc(O)cc1	Phenol-alkyl substituted	32		148	0	0	5	0	0	0	0	0	0	4	2	0	0	0	0	0	0	0	0	0	0	1	0	0	0	0	0	0	0	0	0	0	0	0	0	0	0	0	0	0	0	0	0	0
d-valerolactam	O=C1CCCCN1	Amide	25		149	0	0	8	0	0	0	0	0	1	0	0	0	1	0	0	0	0	0	0	0	0	0	0	0	0	0	0	1	1	0	0	0	0	0	0	0	0	0	0	0	0	0	0	0
n-methyl-d-valerolactam	CN1C(=O)CCCC1	Amide	30		150	0	0	11	0	0	0	0	0	1	0	0	0	0	1	0	0	0	0	0	0	0	0	0	0	0	0	0	1	1	0	0	0	0	0	0	0	0	0	0	0	0	0	0	0
n,n-dimethylacetamide	CN(C)C(C)=O	Amide	26		151	0	0	9	0	0	0	0	0	1	0	0	0	0	1	0	0	0	0	0	0	0	0	0	0	0	0	0	1	1	0	0	0	0	0	0	0	0	0	0	0	0	0	0	0
n-formylpiperidine	O=CN1CCCCC1	Amide	30		152	0	0	10	0	0	1	0	0	1	0	0	0	0	1	0	0	0	0	0	0	0	0	0	0	0	0	0	1	1	0	0	0	0	0	0	0	0	0	0	0	0	0	0	0
n-methylpiperidine	CN1CCCCC1	Amine-Tertiary Cyclic	28		153	0	0	13	0	0	0	0	0	0	0	0	0	0	0	0	0	0	1	0	0	0	0	0	0	0	0	0	0	0	0	0	0	0	0	0	0	0	0	0	0	0	0	0	0
2-methylpiperidine	CC1CCCCN1	Amine-Secondary Cyclic	27		154	0	0	12	0	0	0	0	0	0	0	0	0	0	0	0	0	1	0	0	0	0	0	0	0	0	0	0	0	0	0	0	0	0	0	0	0	0	0	0	0	0	0	0	0
3-methylpiperidine	CC1CCCNC1	Amine-Secondary Cyclic	27		155	0	0	12	0	0	0	0	0	0	0	0	0	0	0	0	0	1	0	0	0	0	0	0	0	0	0	0	0	0	0	0	0	0	0	0	0	0	0	0	0	0	0	0	0
4-methylpiperidine	CC1CCNCC1	Amine-Secondary Cyclic	27		156	0	0	12	0	0	0	0	0	0	0	0	0	0	0	0	0	1	0	0	0	0	0	0	0	0	0	0	0	0	0	0	0	0	0	0	0	0	0	0	0	0	0	0	0
pyrrolidine	C1CCNC1	Amine-Secondary Cyclic	19		157	0	0	8	0	0	0	0	0	0	0	0	0	0	0	0	0	1	0	0	0	0	0	0	0	0	0	0	0	0	0	0	0	0	0	0	0	0	0	0	0	0	0	0	0
n-methylpyrrolidine	CN1CCCC1	Amine-Tertiary Cyclic	24		158	0	0	11	0	0	0	0	0	0	0	0	0	0	0	0	0	0	1	0	0	0	0	0	0	0	0	0	0	0	0	0	0	0	0	0	0	0	0	0	0	0	0	0	0
2-pyrrolidinone	O=C1CCCN1	Amide	21		159	0	0	6	0	0	0	0	0	1	0	0	0	1	0	0	0	0	0	0	0	0	0	0	0	0	0	0	1	1	0	0	0	0	0	0	0	0	0	0	0	0	0	0	0
n-methyl-2-pyrrolidinone	CN1CCCC1=O	Amide	26		160	0	0	9	0	0	0	0	0	1	0	0	0	0	1	0	0	0	0	0	0	0	0	0	0	0	0	0	1	1	0	0	0	0	0	0	0	0	0	0	0	0	0	0	0
n-acetylpiperidine	O=C(C)N1CCCCC1	Amide	34		161	0	0	13	0	0	0	0	0	1	0	0	0	0	1	0	0	0	0	0	0	0	0	0	0	0	0	0	1	1	0	0	0	0	0	0	0	0	0	0	0	0	0	0	0
dimethylsulfide	CSC	Sulfide-Dialkyl	16		162	0	0	6	0	0	0	0	0	0	0	0	0	0	0	0	0	0	0	0	0	0	0	0	0	0	0	0	0	0	0	0	0	1	0	0	0	0	0	0	0	0	0	0	0
diethylsulfide	CCSCC	Sulfide-Dialkyl	24		163	0	0	10	0	0	0	0	0	0	0	0	0	0	0	0	0	0	0	0	0	0	0	0	0	0	0	0	0	0	0	0	0	1	0	0	0	0	0	0	0	0	0	0	0
dipropylsulfide	CCCSCCC	Sulfide-Dialkyl	32		164	0	0	14	0	0	0	0	0	0	0	0	0	0	0	0	0	0	0	0	0	0	0	0	0	0	0	0	0	0	0	0	0	1	0	0	0	0	0	0	0	0	0	0	0
diisopropylsulfide	CC(C)SC(C)C	Sulfide-Dialkyl	32		165	0	0	14	0	0	0	0	0	0	0	0	0	0	0	0	0	0	0	0	0	0	0	0	0	0	0	0	0	0	0	0	0	1	0	0	0	0	0	0	0	0	0	0	0
methylethylsulfide	CSCC	Sulfide-Dialkyl	20		166	0	0	8	0	0	0	0	0	0	0	0	0	0	0	0	0	0	0	0	0	0	0	0	0	0	0	0	0	0	0	0	0	1	0	0	0	0	0	0	0	0	0	0	0
ethene	C=C	Alkene-ethene	12		167	0	0	0	0	2	0	0	0	0	0	0	0	0	0	0	0	0	0	0	0	0	0	0	0	0	0	0	0	0	0	0	0	0	0	0	0	0	0	0	0	0	0	0	0
propene	CC=C	Alkene-methyl substituted	16		168	0	0	3	1	1	0	0	0	0	0	0	0	0	0	0	0	0	0	0	0	0	0	0	0	0	0	0	0	0	0	0	0	0	0	0	0	0	0	0	0	0	0	0	0
1-butene	C=CCC	Alkene-monoalkyl substituted	20		169	0	0	5	1	1	0	0	0	0	0	0	0	0	0	0	0	0	0	0	0	0	0	0	0	0	0	0	0	0	0	0	0	0	0	0	0	0	0	0	0	0	0	0	0
pent-1-ene	CCCC=C	Alkene-monoalkyl substituted	24		170	0	0	7	1	1	0	0	0	0	0	0	0	0	0	0	0	0	0	0	0	0	0	0	0	0	0	0	0	0	0	0	0	0	0	0	0	0	0	0	0	0	0	0	0
hex-1-ene	CCCCC=C	Alkene-monoalkyl substituted	28		171	0	0	9	1	1	0	0	0	0	0	0	0	0	0	0	0	0	0	0	0	0	0	0	0	0	0	0	0	0	0	0	0	0	0	0	0	0	0	0	0	0	0	0	0
hept-1-ene	CCCCCC=C	Alkene-monoalkyl substituted	32		172	0	0	11	1	1	0	0	0	0	0	0	0	0	0	0	0	0	0	0	0	0	0	0	0	0	0	0	0	0	0	0	0	0	0	0	0	0	0	0	0	0	0	0	0
oct-1-ene	CCCCCCC=C	Alkene-monoalkyl substituted	36		173	0	0	13	1	1	0	0	0	0	0	0	0	0	0	0	0	0	0	0	0	0	0	0	0	0	0	0	0	0	0	0	0	0	0	0	0	0	0	0	0	0	0	0	0
non-1-ene	CCCCCCCC=C	Alkene-monoalkyl substituted	40		174	0	0	15	1	1	0	0	0	0	0	0	0	0	0	0	0	0	0	0	0	0	0	0	0	0	0	0	0	0	0	0	0	0	0	0	0	0	0	0	0	0	0	0	0
dec-1-ene	CCCCCCCCC=C	Alkene-monoalkyl substituted	44		175	0	0	17	1	1	0	0	0	0	0	0	0	0	0	0	0	0	0	0	0	0	0	0	0	0	0	0	0	0	0	0	0	0	0	0	0	0	0	0	0	0	0	0	0
undec-1-ene	CCCCCCCCCC=C	Alkene-monoalkyl substituted	48		176	0	0	19	1	1	0	0	0	0	0	0	0	0	0	0	0	0	0	0	0	0	0	0	0	0	0	0	0	0	0	0	0	0	0	0	0	0	0	0	0	0	0	0	0
dodec-1-ene	CCCCCCCCCCC=C	Alkene-monoalkyl substituted	52		177	0	0	21	1	1	0	0	0	0	0	0	0	0	0	0	0	0	0	0	0	0	0	0	0	0	0	0	0	0	0	0	0	0	0	0	0	0	0	0	0	0	0	0	0
n-methylformamide	CNC=O	Amide	17		178	0	0	3	0	0	1	0	0	1	0	0	0	1	0	0	0	0	0	0	0	0	0	0	0	0	0	0	1	1	0	0	0	0	0	0	0	0	0	0	0	0	0	0	0
n,n-dimethylformamide	CN(C)C=O	Amide	22		179	0	0	6	0	0	1	0	0	1	0	0	0	0	1	0	0	0	0	0	0	0	0	0	0	0	0	0	1	1	0	0	0	0	0	0	0	0	0	0	0	0	0	0	0
n,n-diethylformamide	CCN(CC)C=O	Amide	30		180	0	0	10	0	0	1	0	0	1	0	0	0	0	1	0	0	0	0	0	0	0	0	0	0	0	0	0	1	1	0	0	0	0	0	0	0	0	0	0	0	0	0	0	0
n,n-dibutylformamide	CCCCN(C=O)CCCC	Amide	46		181	0	0	18	0	0	1	0	0	1	0	0	0	0	1	0	0	0	0	0	0	0	0	0	0	0	0	0	1	1	0	0	0	0	0	0	0	0	0	0	0	0	0	0	0
n-methylacetamide	CNC(C)=O	Amide	21		182	0	0	6	0	0	0	0	0	1	0	0	0	1	0	0	0	0	0	0	0	0	0	0	0	0	0	0	1	1	0	0	0	0	0	0	0	0	0	0	0	0	0	0	0
n-ethylacetamide	CCNC(C)=O	Amide	25		183	0	0	8	0	0	0	0	0	1	0	0	0	1	0	0	0	0	0	0	0	0	0	0	0	0	0	0	1	1	0	0	0	0	0	0	0	0	0	0	0	0	0	0	0
n-butylacetamide	CCCCNC(C)=O	Amide	33		184	0	0	12	0	0	0	0	0	1	0	0	0	1	0	0	0	0	0	0	0	0	0	0	0	0	0	0	1	1	0	0	0	0	0	0	0	0	0	0	0	0	0	0	0
n,n-diethylacetamide	CCN(CC)C(C)=O	Amide	34		185	0	0	13	0	0	0	0	0	1	0	0	0	0	1	0	0	0	0	0	0	0	0	0	0	0	0	0	1	1	0	0	0	0	0	0	0	0	0	0	0	0	0	0	0
methylethylether	CCOC	Ether-Dialkyl	18		186	0	0	8	0	0	0	0	0	0	0	0	0	0	0	0	0	0	0	0	0	0	0	0	1	0	0	0	0	0	0	0	0	0	0	0	0	0	0	0	0	0	0	0	0
methylcyclohexylether	COC1CCCCC1	Ether-Dialkyl	30		187	0	0	14	0	0	0	0	0	0	0	0	0	0	0	0	0	0	0	0	0	0	0	0	1	0	0	0	0	0	0	0	0	0	0	0	0	0	0	0	0	0	0	0	0
undecan-1-ol	CCCCCCCCCCCO	Alcohol-Primary	49		188	0	0	23	0	0	0	0	0	0	0	0	0	0	0	0	0	0	0	0	0	0	0	1	0	0	0	0	0	0	0	0	0	0	0	0	0	0	0	0	0	0	0	0	0
dodecan-1-ol	CCCCCCCCCCCCO	Alcohol-Primary	53		189	0	0	25	0	0	0	0	0	0	0	0	0	0	0	0	0	0	0	0	0	0	0	1	0	0	0	0	0	0	0	0	0	0	0	0	0	0	0	0	0	0	0	0	0
tridecan-1-ol	CCCCCCCCCCCCCO	Alcohol-Primary	57		190	0	0	27	0	0	0	0	0	0	0	0	0	0	0	0	0	0	0	0	0	0	0	1	0	0	0	0	0	0	0	0	0	0	0	0	0	0	0	0	0	0	0	0	0
tetradecan-1-ol	CCCCCCCCCCCCCCO	Alcohol-Primary	61		191	0	0	29	0	0	0	0	0	0	0	0	0	0	0	0	0	0	0	0	0	0	0	1	0	0	0	0	0	0	0	0	0	0	0	0	0	0	0	0	0	0	0	0	0
pentadecan-1-ol	CCCCCCCCCCCCCCCO	Alcohol-Primary	65		192	0	0	31	0	0	0	0	0	0	0	0	0	0	0	0	0	0	0	0	0	0	0	1	0	0	0	0	0	0	0	0	0	0	0	0	0	0	0	0	0	0	0	0	0
hexadecan-1-ol	CCCCCCCCCCCCCCCCO	Alcohol-Primary	69		193	0	0	33	0	0	0	0	0	0	0	0	0	0	0	0	0	0	0	0	0	0	0	1	0	0	0	0	0	0	0	0	0	0	0	0	0	0	0	0	0	0	0	0	0
heptadecan-1-ol	CCCCCCCCCCCCCCCCCO	Alcohol-Primary	73		194	0	0	35	0	0	0	0	0	0	0	0	0	0	0	0	0	0	0	0	0	0	0	1	0	0	0	0	0	0	0	0	0	0	0	0	0	0	0	0	0	0	0	0	0
octadecan-1-ol	CCCCCCCCCCCCCCCCCCO	Alcohol-Primary	77		195	0	0	37	0	0	0	0	0	0	0	0	0	0	0	0	0	0	0	0	0	0	0	1	0	0	0	0	0	0	0	0	0	0	0	0	0	0	0	0	0	0	0	0	0
nonadecan-1-ol	CCCCCCCCCCCCCCCCCCCO	Alcohol-Primary	81		196	0	0	39	0	0	0	0	0	0	0	0	0	0	0	0	0	0	0	0	0	0	0	1	0	0	0	0	0	0	0	0	0	0	0	0	0	0	0	0	0	0	0	0	0
eicosan-1-ol	CCCCCCCCCCCCCCCCCCCCO	Alcohol-Primary	85		197	0	0	41	0	0	0	0	0	0	0	0	0	0	0	0	0	0	0	0	0	0	0	1	0	0	0	0	0	0	0	0	0	0	0	0	0	0	0	0	0	0	0	0	0
adamantan-1-ol	OC12CC3CC(C1)CC(C2)C3	Alcohol-Tertiary	33		198	0	0	15	0	0	0	0	0	0	0	0	0	0	0	0	0	0	0	0	0	0	0	1	0	0	0	0	0	0	0	0	0	0	0	0	0	0	0	0	0	0	0	0	0
propan-2-ol	CC(C)O	Alcohol-Secondary	17		199	0	0	7	0	0	0	0	0	0	0	0	0	0	0	0	0	0	0	0	0	0	0	1	0	0	0	0	0	0	0	0	0	0	0	0	0	0	0	0	0	0	0	0	0
butan-2-ol	CCC(C)O	Alcohol-Secondary	21		200	0	0	9	0	0	0	0	0	0	0	0	0	0	0	0	0	0	0	0	0	0	0	1	0	0	0	0	0	0	0	0	0	0	0	0	0	0	0	0	0	0	0	0	0
pentan-2-ol	CCCC(C)O	Alcohol-Secondary	25		201	0	0	11	0	0	0	0	0	0	0	0	0	0	0	0	0	0	0	0	0	0	0	1	0	0	0	0	0	0	0	0	0	0	0	0	0	0	0	0	0	0	0	0	0
hexan-2-ol	CCCCC(C)O	Alcohol-Secondary	29		202	0	0	13	0	0	0	0	0	0	0	0	0	0	0	0	0	0	0	0	0	0	0	1	0	0	0	0	0	0	0	0	0	0	0	0	0	0	0	0	0	0	0	0	0
heptan-2-ol	CCCCCC(C)O	Alcohol-Secondary	33		203	0	0	15	0	0	0	0	0	0	0	0	0	0	0	0	0	0	0	0	0	0	0	1	0	0	0	0	0	0	0	0	0	0	0	0	0	0	0	0	0	0	0	0	0
octan-2-ol	CCCCCCC(C)O	Alcohol-Secondary	37		204	0	0	17	0	0	0	0	0	0	0	0	0	0	0	0	0	0	0	0	0	0	0	1	0	0	0	0	0	0	0	0	0	0	0	0	0	0	0	0	0	0	0	0	0
2-methylbutan-2-ol	CCC(C)(C)O	Alcohol-Tertiary	25		205	0	0	11	0	0	0	0	0	0	0	0	0	0	0	0	0	0	0	0	0	0	0	1	0	0	0	0	0	0	0	0	0	0	0	0	0	0	0	0	0	0	0	0	0
2-methylpropan-2-ol	CC(C)(C)O	Alcohol-Tertiary	21		206	0	0	9	0	0	0	0	0	0	0	0	0	0	0	0	0	0	0	0	0	0	0	1	0	0	0	0	0	0	0	0	0	0	0	0	0	0	0	0	0	0	0	0	0
2-methylpentan-2-ol	CCCC(C)(C)O	Alcohol-Tertiary	29		207	0	0	13	0	0	0	0	0	0	0	0	0	0	0	0	0	0	0	0	0	0	0	1	0	0	0	0	0	0	0	0	0	0	0	0	0	0	0	0	0	0	0	0	0
2-methylhexan-2-ol	CCCCC(C)(C)O	Alcohol-Tertiary	33		208	0	0	15	0	0	0	0	0	0	0	0	0	0	0	0	0	0	0	0	0	0	0	1	0	0	0	0	0	0	0	0	0	0	0	0	0	0	0	0	0	0	0	0	0
2-methylheptan-2-ol	CCCCCC(C)(C)O	Alcohol-Tertiary	37		209	0	0	17	0	0	0	0	0	0	0	0	0	0	0	0	0	0	0	0	0	0	0	1	0	0	0	0	0	0	0	0	0	0	0	0	0	0	0	0	0	0	0	0	0
cyclopentanol	OC1CCCC1	Alcohol-Secondary	21		210	0	0	9	0	0	0	0	0	0	0	0	0	0	0	0	0	0	0	0	0	0	0	1	0	0	0	0	0	0	0	0	0	0	0	0	0	0	0	0	0	0	0	0	0
cyclohexanol	OC1CCCCC1	Alcohol-Secondary	25		211	0	0	11	0	0	0	0	0	0	0	0	0	0	0	0	0	0	0	0	0	0	0	1	0	0	0	0	0	0	0	0	0	0	0	0	0	0	0	0	0	0	0	0	0
cycloheptanol	OC1CCCCCC1	Alcohol-Secondary	29		212	0	0	13	0	0	0	0	0	0	0	0	0	0	0	0	0	0	0	0	0	0	0	1	0	0	0	0	0	0	0	0	0	0	0	0	0	0	0	0	0	0	0	0	0
cyclooctanol	OC1CCCCCCC1	Alcohol-Secondary	33		213	0	0	15	0	0	0	0	0	0	0	0	0	0	0	0	0	0	0	0	0	0	0	1	0	0	0	0	0	0	0	0	0	0	0	0	0	0	0	0	0	0	0	0	0
adamantane	C1C2CC3CC1CC(C2)C3	Alkane-Cyclic	32		214	0	0	16	0	0	0	0	0	0	0	0	0	0	0	0	0	0	0	0	0	0	0	0	0	0	0	0	0	0	0	0	0	0	0	0	0	0	0	0	0	0	0	0	0
cyclohexylmethylketone	CC(=O)C1CCCCC1	Ketone-Dialkyl	34		215	0	0	14	0	0	0	0	1	0	0	0	0	0	0	0	0	0	0	0	0	0	0	0	0	0	1	1	0	0	0	0	0	0	0	0	0	0	0	0	0	0	0	0	0
2-methylcyclohexanone	CC1CCCCC1=O	Ketone-Cycloalkyl	30		216	0	0	12	0	0	0	0	1	0	0	0	0	0	0	0	0	0	0	0	0	0	0	0	0	0	1	1	0	0	0	0	0	0	0	0	0	0	0	0	0	0	0	0	0
cyclopropane	C1CC1	Alkane-Cyclic	12		217	0	0	6	0	0	0	0	0	0	0	0	0	0	0	0	0	0	0	0	0	0	0	0	0	0	0	0	0	0	0	0	0	0	0	0	0	0	0	0	0	0	0	0	0
propylcyclopentane	CCCC1CCCC1	Alkane-Cyclic Branched	32		218	0	0	16	0	0	0	0	0	0	0	0	0	0	0	0	0	0	0	0	0	0	0	0	0	0	0	0	0	0	0	0	0	0	0	0	0	0	0	0	0	0	0	0	0
pentylcyclopentane	CCCCCC1CCCC1	Alkane-Cyclic Branched	40		219	0	0	20	0	0	0	0	0	0	0	0	0	0	0	0	0	0	0	0	0	0	0	0	0	0	0	0	0	0	0	0	0	0	0	0	0	0	0	0	0	0	0	0	0
propylcyclohexane	CCCC1CCCCC1	Alkane-Cyclic Branched	36		220	0	0	18	0	0	0	0	0	0	0	0	0	0	0	0	0	0	0	0	0	0	0	0	0	0	0	0	0	0	0	0	0	0	0	0	0	0	0	0	0	0	0	0	0
butylcyclohexane	CCCCC1CCCCC1	Alkane-Cyclic Branched	40		221	0	0	20	0	0	0	0	0	0	0	0	0	0	0	0	0	0	0	0	0	0	0	0	0	0	0	0	0	0	0	0	0	0	0	0	0	0	0	0	0	0	0	0	0
t-butylcyclohexane	CC(C)(C)C1CCCCC1	Alkane-Cyclic Branched	40		222	0	0	20	0	0	0	0	0	0	0	0	0	0	0	0	0	0	0	0	0	0	0	0	0	0	0	0	0	0	0	0	0	0	0	0	0	0	0	0	0	0	0	0	0
2-methylpyridine	Cc1ccccn1	Pyridine-Methyl substituted	25		223	0	0	3	0	0	0	0	0	0	4	1	0	0	0	0	0	0	0	1	0	0	0	0	0	0	0	0	0	0	0	0	0	0	0	0	0	0	0	0	0	0	0	0	0
3-methylpyridine	Cc1cccnc1	Pyridine-Methyl substituted	25		224	0	0	3	0	0	0	0	0	0	4	1	0	0	0	0	0	0	0	1	0	0	0	0	0	0	0	0	0	0	0	0	0	0	0	0	0	0	0	0	0	0	0	0	0
4-methylpyridine	Cc1ccncc1	Pyridine-Methyl substituted	25		225	0	0	3	0	0	0	0	0	0	4	1	0	0	0	0	0	0	0	1	0	0	0	0	0	0	0	0	0	0	0	0	0	0	0	0	0	0	0	0	0	0	0	0	0
2,3-dimethylpyridine	Cc1cccnc1C	Pyridine-Methyl substituted	30		226	0	0	6	0	0	0	0	0	0	3	2	0	0	0	0	0	0	0	1	0	0	0	0	0	0	0	0	0	0	0	0	0	0	0	0	0	0	0	0	0	0	0	0	0
2,4-dimethylpyridine	Cc1ccnc(C)c1	Pyridine-Methyl substituted	30		227	0	0	6	0	0	0	0	0	0	3	2	0	0	0	0	0	0	0	1	0	0	0	0	0	0	0	0	0	0	0	0	0	0	0	0	0	0	0	0	0	0	0	0	0
2,5-dimethylpyridine	Cc1ccc(C)nc1	Pyridine-Methyl substituted	30		228	0	0	6	0	0	0	0	0	0	3	2	0	0	0	0	0	0	0	1	0	0	0	0	0	0	0	0	0	0	0	0	0	0	0	0	0	0	0	0	0	0	0	0	0
2,6-dimethylpyridine	Cc1cccc(C)n1	Pyridine-Methyl substituted	30		229	0	0	6	0	0	0	0	0	0	3	2	0	0	0	0	0	0	0	1	0	0	0	0	0	0	0	0	0	0	0	0	0	0	0	0	0	0	0	0	0	0	0	0	0
3,4-dimethylpyridine	Cc1cnccc1C	Pyridine-Methyl substituted	30		230	0	0	6	0	0	0	0	0	0	3	2	0	0	0	0	0	0	0	1	0	0	0	0	0	0	0	0	0	0	0	0	0	0	0	0	0	0	0	0	0	0	0	0	0
3,5-dimethylpyridine	Cc1cncc(C)c1	Pyridine-Methyl substituted	30		231	0	0	6	0	0	0	0	0	0	3	2	0	0	0	0	0	0	0	1	0	0	0	0	0	0	0	0	0	0	0	0	0	0	0	0	0	0	0	0	0	0	0	0	0
quinoline	c1ccc2ncccc2c1	Pyridine-Quinoline	32		232	0	0	0	0	0	0	0	0	0	7	2	0	0	0	0	0	0	0	1	0	0	0	0	0	0	0	0	0	0	0	0	0	0	0	0	0	0	0	0	0	0	0	0	0
isoquinoline	c1ccc2cnccc2c1	Pyridine-Isoquinoline	32		233	0	0	0	0	0	0	0	0	0	7	2	0	0	0	0	0	0	0	1	0	0	0	0	0	0	0	0	0	0	0	0	0	0	0	0	0	0	0	0	0	0	0	0	0
propylbenzene	CCCc1ccccc1	Benzene-Alkyl Substituted	33		234	0	0	7	0	0	0	0	0	0	5	1	0	0	0	0	0	0	0	0	0	0	0	0	0	0	0	0	0	0	0	0	0	0	0	0	0	0	2	0	0	0	0	0	0
butylbenzene	CCCCc1ccccc1	Benzene-Alkyl Substituted	37		235	0	0	9	0	0	0	0	0	0	5	1	0	0	0	0	0	0	0	0	0	0	0	0	0	0	0	0	0	0	0	0	0	0	0	0	0	0	2	0	0	0	0	0	0
pentylbenzene	CCCCCc1ccccc1	Benzene-Alkyl Substituted	41		236	0	0	11	0	0	0	0	0	0	5	1	0	0	0	0	0	0	0	0	0	0	0	0	0	0	0	0	0	0	0	0	0	0	0	0	0	0	2	0	0	0	0	0	0
hexylbenzene	CCCCCCc1ccccc1	Benzene-Alkyl Substituted	45		237	0	0	13	0	0	0	0	0	0	5	1	0	0	0	0	0	0	0	0	0	0	0	0	0	0	0	0	0	0	0	0	0	0	0	0	0	0	2	0	0	0	0	0	0
isopropylbenzene	CC(C)c1ccccc1	Benzene-Alkyl Substituted	33		238	0	0	7	0	0	0	0	0	0	5	1	0	0	0	0	0	0	0	0	0	0	0	0	0	0	0	0	0	0	0	0	0	0	0	0	0	0	2	0	0	0	0	0	0
tert-butylbenzene	CC(C)(C)c1ccccc1	Benzene-Alkyl Substituted	37		239	0	0	9	0	0	0	0	0	0	5	1	0	0	0	0	0	0	0	0	0	0	0	0	0	0	0	0	0	0	0	0	0	0	0	0	0	0	2	0	0	0	0	0	0
1,3-dichlorobenzene	[Cl]c1cccc([Cl])c1	Benzene-Dichloro	28		240	0	0	0	0	0	0	0	0	0	4	2	0	0	0	0	0	0	0	0	0	0	0	0	0	0	0	0	0	0	0	0	0	0	0	0	2	0	0	0	0	0	0	0	0
1,4-dichlorobenzene	[Cl]c1ccc([Cl])cc1	Benzene-Dichloro	28		241	0	0	0	0	0	0	0	0	0	4	2	0	0	0	0	0	0	0	0	0	0	0	0	0	0	0	0	0	0	0	0	0	0	0	0	2	0	0	0	0	0	0	0	0
fluoranthene	c1ccc2c(c1)c3cccc4cccc2c34	Polycyclic aromatic	48		242	0	0	0	0	0	0	0	0	0	10	6	0	0	0	0	0	0	0	0	0	0	0	0	0	0	0	0	0	0	0	0	0	0	0	0	0	0	0	0	0	0	6	0	0
coronene	c1cc2ccc3ccc4ccc5ccc6ccc1c7c2c3c4c5c67	Polycyclic aromatic	74		243	0	0	0	0	0	0	0	0	0	12	12	0	0	0	0	0	0	0	0	0	0	0	0	0	0	0	0	0	0	0	0	0	0	0	0	0	0	0	0	0	0	14	0	0
acenaphthene	C1Cc2cccc3cccc1c23	Polycyclic aromatic	38		244	0	0	4	0	0	0	0	0	0	6	4	0	0	0	0	0	0	0	0	0	0	0	0	0	0	0	0	0	0	0	0	0	0	0	0	0	0	0	0	0	0	4	0	0
fluorene	C1c2ccccc2c2ccccc12	Benzene-Biphenyl	40		245	0	0	2	0	0	0	0	0	0	8	4	0	0	0	0	0	0	0	0	0	0	0	0	0	0	0	0	0	0	0	0	0	0	0	0	0	0	4	0	0	0	0	0	0
indane	C1Cc2ccccc2C1	Benzene-indane	30		246	0	0	6	0	0	0	0	0	0	4	2	0	0	0	0	0	0	0	0	0	0	0	0	0	0	0	0	0	0	0	0	0	0	0	0	0	0	0	2	0	0	0	0	0
fluoroethane	CCF	Alkane-Monofluoro	12		247	2	0	3	0	0	0	0	0	0	0	0	0	0	0	0	0	0	0	0	0	0	0	0	0	0	0	0	0	0	1	0	0	0	0	0	0	0	0	0	0	0	0	0	0
1-fluoropropane	CCCF	Alkane-Monofluoro	16		248	2	0	5	0	0	0	0	0	0	0	0	0	0	0	0	0	0	0	0	0	0	0	0	0	0	0	0	0	0	1	0	0	0	0	0	0	0	0	0	0	0	0	0	0
2-fluoropropane	CC(C)F	Alkane-Monofluoro	16		249	1	0	6	0	0	0	0	0	0	0	0	0	0	0	0	0	0	0	0	0	0	0	0	0	0	0	0	0	0	1	0	0	0	0	0	0	0	0	0	0	0	0	0	0
1-fluorobutane	CCCCF	Alkane-Monofluoro	20		250	2	0	7	0	0	0	0	0	0	0	0	0	0	0	0	0	0	0	0	0	0	0	0	0	0	0	0	0	0	1	0	0	0	0	0	0	0	0	0	0	0	0	0	0
1-fluoropentane	CCCCCF	Alkane-Monofluoro	24		251	2	0	9	0	0	0	0	0	0	0	0	0	0	0	0	0	0	0	0	0	0	0	0	0	0	0	0	0	0	1	0	0	0	0	0	0	0	0	0	0	0	0	0	0
fluorobenzene	Fc1ccccc1	Benzene-Monofluoro	21		252	0	0	0	0	0	0	0	0	0	5	1	0	0	0	0	0	0	0	0	0	0	0	0	0	0	0	0	0	0	0	0	1	0	0	0	0	0	0	0	0	0	0	2	0
1,2-difluorobenzene	Fc1ccccc1F	Benzene-Difluoro	22		253	0	0	0	0	0	0	0	0	0	4	2	0	0	0	0	0	0	0	0	0	0	0	0	0	0	0	0	0	0	0	0	2	0	0	0	0	0	0	0	0	0	0	0	0
1,3-difluorobenzene	Fc1cccc(F)c1	Benzene-Difluoro	22		254	0	0	0	0	0	0	0	0	0	4	2	0	0	0	0	0	0	0	0	0	0	0	0	0	0	0	0	0	0	0	0	2	0	0	0	0	0	0	0	0	0	0	0	0
1,4-difluorobenzene	Fc1ccc(F)cc1	Benzene-Difluoro	22		255	0	0	0	0	0	0	0	0	0	4	2	0	0	0	0	0	0	0	0	0	0	0	0	0	0	0	0	0	0	0	0	2	0	0	0	0	0	0	0	0	0	0	0	0
o-fluorochlorobenzene	Fc1ccccc1[Cl]	Benzene-ChloroFluoro	25		256	0	0	0	0	0	0	0	0	0	4	2	0	0	0	0	0	0	0	0	0	0	0	0	0	0	0	0	0	0	0	0	1	0	0	0	1	0	0	0	0	0	0	0	0
m-fluorochlorobenzene	Fc1cccc([Cl])c1	Benzene-ChloroFluoro	25		257	0	0	0	0	0	0	0	0	0	4	2	0	0	0	0	0	0	0	0	0	0	0	0	0	0	0	0	0	0	0	0	1	0	0	0	1	0	0	0	0	0	0	0	0
p-fluorochlorobenzene	Fc1ccc([Cl])cc1	Benzene-ChloroFluoro	25		258	0	0	0	0	0	0	0	0	0	4	2	0	0	0	0	0	0	0	0	0	0	0	0	0	0	0	0	0	0	0	0	1	0	0	0	1	0	0	0	0	0	0	0	0
3-fluorophenol	Oc1cccc(F)c1	Phenol-Fluoro substituted	24		259	0	0	0	0	0	0	0	0	0	4	2	0	0	0	0	0	0	0	0	0	0	1	0	0	0	0	0	0	0	0	0	1	0	0	0	0	0	0	0	0	0	0	0	0
4-fluorophenol	Oc1ccc(F)cc1	Phenol-Fluoro substituted	24		260	0	0	0	0	0	0	0	0	0	4	2	0	0	0	0	0	0	0	0	0	0	1	0	0	0	0	0	0	0	0	0	1	0	0	0	0	0	0	0	0	0	0	0	0
fluoromethane	CF	Alkane-Monofluoro	8		261	3	0	0	0	0	0	0	0	0	0	0	0	0	0	0	0	0	0	0	0	0	0	0	0	0	0	0	0	0	1	0	0	0	0	0	0	0	0	0	0	0	0	0	0
cis-but-2-ene	CC=CC	Alkene-methyl substituted	20		262	0	0	6	2	0	0	0	0	0	0	0	0	0	0	0	0	0	0	0	0	0	0	0	0	0	0	0	0	0	0	0	0	0	0	0	0	0	0	0	0	0	0	0	0
trans-but-2-ene	CC=CC	Alkene-methyl substituted	20		263	0	0	6	2	0	0	0	0	0	0	0	0	0	0	0	0	0	0	0	0	0	0	0	0	0	0	0	0	0	0	0	0	0	0	0	0	0	0	0	0	0	0	0	0
2-methylbut-2-ene	CC=C(C)C	Alkene-methyl substituted	24		264	0	0	9	1	0	0	1	0	0	0	0	0	0	0	0	0	0	0	0	0	0	0	0	0	0	0	0	0	0	0	0	0	0	0	0	0	0	0	0	0	0	0	0	0
2,3-dimethylbut-2-ene	CC(C)=C(C)C	Alkene-methyl substituted	28		265	0	0	12	0	0	0	2	0	0	0	0	0	0	0	0	0	0	0	0	0	0	0	0	0	0	0	0	0	0	0	0	0	0	0	0	0	0	0	0	0	0	0	0	0
2,2-dimethylpropane	CC(C)(C)C	Alkane Acyclic Branched	24		266	0	0	12	0	0	0	0	0	0	0	0	0	0	0	0	0	0	0	0	0	0	0	0	0	0	0	0	0	0	0	0	0	0	0	0	0	0	0	0	0	0	0	0	0
[truncated: 11 more columns]

## Sheet: 4 SSIP ∆Gs
This sheet uses the table of substructure fragments and SSIP parameters together with the specified solvent parameters to calculate the free energy contribution for each fragment.																	NON-POLAR SOLVENT - ONE TYPE OF DONOR AND ONE TYPE OF ACCEPTOR										WATER - ONE TYPE OF DONOR AND ONE TYPE OF ACCEPTOR											POLAR SOLVENT - TWO TYPES OF DONOR AND TWO TYPES OF ACCEPTOR
																																							Gas Const R=	8.31446
																			T (K)	Simple Solvent Name	aS	CSa	bS	CSb	C0				T (K)	Simple Solvent Name	aS	CSa	bS	CSb	C0				RT	T (K)	Complex Solvent Name	aS1	Ca1	bS1	Cb1	aS2	Ca2	bS2	Cb2
																			298	Benzene	1.4	2.4963	2	1.09033	0				298	Water	3.8	-0.762041	3.47	-0.762041	0				2.47771	298	Methanol	1.2	2.75001	0.6	2.95421	3.5	-6.02105	6.9	-6.4215
																				Parameters for Transfer										Parameters for Transfer											Parameters for Transfer
																			ID	Simple Solvent Name	C0	Lookup Column for Group Contrib								Simple Solvent Name	C0	Lookup Column for Group Contrib								ID	Complex Solvent Name	C0	Lookup Column for Group Contrib
																			NP2	Benzene	0	0								Water	0	0								P10	Methanol	0.180796	0
																	Fragment Calcs. for Simple Solvent		solvent const		solvent const		solvent const		solvent const		Fragment Calcs. for Simple Solvent		solvent const		solvent const		solvent const		solvent const	include/ exclude		Fragment Calcs. for Complex Solvent	RT=	2.47771
		Table of atom fragments and values of alpha and beta for the associated donor and ecceptor SIPS															Benzene										Water									1		Methanol
		Values in the green highlighted cells were based on previosly determined experimental values.																bS	CSb	bS	CSb	aS	CSa	aS	CSa	Benzene	include/exclude	bS	CSb	bS	CSb	aS	CSa	aS	CSa	Water		aS1	Ca1	aS2	Ca2					aS1	Ca1	aS2	Ca2
		Values in the yellow highlighted cells were adjusted in oreder to minimise the rmsd between calculated and experimental deltaG values																2	1.09033	2	1.09033	1.4	2.4963	1.4	2.4963		1	3.47	-0.762041	3.47	-0.762041	3.8	-0.762041	3.8	-0.762041			1.2	2.75001	3.5	-6.02105					1.2	2.75001	3.5	-6.02105
		Fragment ID	Description		Central Atom Type	SMARTS Pattern	no of alpha1 SSIP	Alpha1	No of Alpha2 SSIP	Alpha2	no of beta1 SSIP	Beta1	no of beta2 SSIP	Beta2	Fragment ID		alphaS*betaS	Alpha1*BetaS -DeltaG	Alpha1 Subtotal + const	Alpha2*BetaS -DeltaG	Alpha2 Subtotal + const	AlphaS*Beta1 -DeltaG	Beta1 Subtotal + const	AlphaS*Beta2 -DeltaG	Beta2 Subtotal + const	-Dg0 (Total per Fragment)	alphaS*betaS	Alpha1*BetaS -DeltaG	Alpha1 Subtotal + const	Alpha2*BetaS -DeltaG	Alpha2 Subtotal + const	AlphaS*Beta1 -DeltaG	Beta1 Subtotal + const	AlphaS*Beta2 -DeltaG	Beta2 Subtotal + const	-Dg0 (Total per Fragment)		AS1*B1	C_alpha1	AS2*B1	C_alpha2	K'1	K'2	K'1+ K'2	Solvation of fragment Beta1	A1s*B2	C_alpha1S	A2s*B2	C_alpha2S
		1	H attached to sp3 C also bonded to one F atom		Csp3	[H]CF	1	1.7	0	0	1	0.2	0	0	1		2.8	3.4	4.49033	0	1.09033	0.28	2.7763	0	2.4963	7.26663	13.186	5.899	5.13696	0	-0.762041	0.76	-0.00204065	0	-0.762041	5.13492		0.24	2.75001	0.7	-6.02105	3.34265	0.116768	3.45941	2.90795	0	2.75001	0	-6.02105
		2	H attached to sp3 C also bonded to one Cl atom		Csp3	[H]C(Cl)	1	1.6	0	0	1	0.6	0	0	2		2.8	3.2	4.29033	0	1.09033	0.84	3.3363	0	2.4963	7.62663	13.186	5.552	4.78996	0	-0.762041	2.28	1.51796	0	-0.762041	6.30792		0.72	2.75001	2.1	-6.02105	4.05719	0.205455	4.26264	3.35396	0	2.75001	0	-6.02105
		3	H attached to sp3 C		Csp3	[H]C	1	1.2	0	0	1	0.6	0	0	3		2.8	2.4	3.49033	0	1.09033	0.84	3.3363	0	2.4963	6.82663	13.186	4.164	3.40196	0	-0.762041	2.28	1.51796	0	-0.762041	4.91992		0.72	2.75001	2.1	-6.02105	4.05719	0.205455	4.26264	3.35396	0	2.75001	0	-6.02105
		4	sp2 C with H attached		Csp2 aliphatic	[H][C](C)=C	1	1.2	0	0	2	1.30634	1	0.6	4		2.8	2.4	3.49033	0	1.09033	1.82888	4.32518	0.84	3.3363	15.477	13.186	4.164	3.40196	0	-0.762041	4.96409	4.20205	2.28	1.51796	13.324		1.56761	2.75001	4.57219	-6.02105	5.71208	0.557242	6.26933	4.11045	0.72	2.75001	2.1	-6.02105
		5	sp2 C with two H attached		Csp2 aliphatic	[H][C]([H])=C	2	1.2	0	0	2	1.30634	2	0.6	5		2.8	2.4	3.49033	0	1.09033	1.82888	4.32518	0.84	3.3363	22.3036	13.186	4.164	3.40196	0	-0.762041	4.96409	4.20205	2.28	1.51796	18.2439		1.56761	2.75001	4.57219	-6.02105	5.71208	0.557242	6.26933	4.11045	0.72	2.75001	2.1	-6.02105
		6	H attached to sp2 C in a formamide		Csp2 aliphatic	[H][C](N)=O	1	1.2	0	0	1	0.6	0	0	6		2.8	2.4	3.49033	0	1.09033	0.84	3.3363	0	2.4963	6.82663	13.186	4.164	3.40196	0	-0.762041	2.28	1.51796	0	-0.762041	4.91992		0.72	2.75001	2.1	-6.02105	4.05719	0.205455	4.26264	3.35396	0	2.75001	0	-6.02105
		7	sp2 C with no attached H		Csp2 aliphatic	C[C](C)=C	0	0	0	0	2	1.30634	0	0	7		2.8	0	1.09033	0	1.09033	1.82888	4.32518	0	2.4963	8.65035	13.186	0	-0.762041	0	-0.762041	4.96409	4.20205	0	-0.762041	8.4041		1.56761	2.75001	4.57219	-6.02105	5.71208	0.557242	6.26933	4.11045	0	2.75001	0	-6.02105
		8	sp2 C in a ketone		Csp2 aliphatic	C[C](C)=O	2	1.5	0	0	0	0	0	0	8		2.8	3	4.09033	0	1.09033	0	2.4963	0	2.4963	8.18067	13.186	5.205	4.44296	0	-0.762041	0	-0.762041	0	-0.762041	8.88592		0	2.75001	0	-6.02105	3.03405	0.0880293	3.12208	2.68123	0	2.75001	0	-6.02105
		9	sp2 C in an amide		Csp2 aliphatic	C[C](N)=O	2	1.5	0	0	0	0	0	0	9		2.8	3	4.09033	0	1.09033	0	2.4963	0	2.4963	8.18067	13.186	5.205	4.44296	0	-0.762041	0	-0.762041	0	-0.762041	8.88592		0	2.75001	0	-6.02105	3.03405	0.0880293	3.12208	2.68123	0	2.75001	0	-6.02105
		10	CH in benzene or pyridine ring		Csp2 aromatic	c[c]([H])c or n[c]([H])c	1	1.4	0	0	2	0.7	0	0	10		2.8	2.8	3.89033	0	1.09033	0.98	3.4763	0	2.4963	10.8429	13.186	4.858	4.09596	0	-0.762041	2.66	1.89796	0	-0.762041	7.89188		0.84	2.75001	2.45	-6.02105	4.25852	0.236627	4.49515	3.46366	0	2.75001	0	-6.02105
		11	Quaternary aromatic sp2 C atom		Csp2 aromatic	c[c](*)c or n[c]( *)c	0	0	0	0	2	0.88	0	0	11		2.8	0	1.09033	0	1.09033	1.232	3.7283	0	2.4963	7.4566	13.186	0	-0.762041	0	-0.762041	3.344	2.58196	0	-0.762041	5.16392		1.056	2.75001	3.08	-6.02105	4.64643	0.305135	4.95157	3.65908	0	2.75001	0	-6.02105
		12	sp C in nitrile		Csp_C#N	C[C]#N	4	1.5	0	0	0	0	0	0	12		2.8	3	4.09033	0	1.09033	0	2.4963	0	2.4963	16.3613	13.186	5.205	4.44296	0	-0.762041	0	-0.762041	0	-0.762041	17.7718		0	2.75001	0	-6.02105	3.03405	0.0880293	3.12208	2.68123	0	2.75001	0	-6.02105
		13	NH in secondary amide		Nsp3	[H][N](C=O)C	1	2.812	0	0	2	2.71001	0	0	13		2.8	5.624	6.71433	0	1.09033	3.79401	6.29031	0	2.4963	19.295	13.186	9.75764	8.9956	0	-0.762041	10.298	9.53598	0	-0.762041	28.0676		3.25201	2.75001	9.48502	-6.02105	11.2729	4.04732	15.3203	5.54234	0	2.75001	0	-6.02105
		14	N in tertiary amide		Nsp3	C[N](C=O)C	0	0	0	0	2	2.71001	0	0	14		2.8	0	1.09033	0	1.09033	3.79401	6.29031	0	2.4963	12.5806	13.186	0	-0.762041	0	-0.762041	10.298	9.53598	0	-0.762041	19.072		3.25201	2.75001	9.48502	-6.02105	11.2729	4.04732	15.3203	5.54234	0	2.75001	0	-6.02105
		15	NH3 in ammonia		Nsp3	[H]N([H])[H]	3	1.59137	0	0	1	6.8	1	0.807164	15		2.8	3.18273	4.27307	0	1.09033	9.52	12.0163	1.13003	3.62633	28.4618	13.186	5.52204	4.76	0	-0.762041	25.84	25.078	3.06722	2.30518	41.6632		8.16	2.75001	23.8	-6.02105	81.7171	1307.09	1388.81	17.6384	0.968597	2.75001	2.82507	-6.02105
		16	NH2 in primary amine		Nsp3	[H][N]([H])C	2	1.59137	0	0	1	8	1	0.952502	16		2.8	3.18273	4.27307	0	1.09033	11.2	13.6963	1.3335	3.8298	26.0722	13.186	5.52204	4.76	0	-0.762041	30.4	29.638	3.61951	2.85747	42.0154		9.6	2.75001	28	-6.02105	146.123	7120.08	7266.2	21.9297	1.143	2.75001	3.33376	-6.02105
		17	NH in secondary amine		Nsp3	[H][N](C)C	1	1.59137	0	0	1	7.9	1	2.44372	17		2.8	3.18273	4.27307	0	1.09033	11.06	13.5563	3.4212	5.91751	23.7469	13.186	5.52204	4.76	0	-0.762041	30.02	29.258	9.28613	8.52409	42.542		9.48	2.75001	27.65	-6.02105	139.214	6182.11	6321.32	21.575	2.93246	2.75001	8.55301	-6.02105
		18	N in tertiary amine		Nsp3	C[N](C)C	0	0	0	0	1	7.5	1	3.5865	18		2.8	0	1.09033	0	1.09033	10.5	12.9963	5.0211	7.5174	20.5137	13.186	0	-0.762041	0	-0.762041	28.5	27.738	13.6287	12.8667	40.6046		9	2.75001	26.25	-6.02105	114.696	3513.53	3628.23	20.152	4.3038	2.75001	12.5528	-6.02105
		19	sp2 N in pyridine ring		Nsp2 aromatic	[n]1ccccc1	0	0	0	0	1	7.3	2	1	19		2.8	0	1.09033	0	1.09033	10.22	12.7163	1.4	3.8963	20.5089	13.186	0	-0.762041	0	-0.762041	27.74	26.978	3.8	3.03796	33.0539		8.76	2.75001	25.55	-6.02105	104.107	2648.79	2752.89	19.4373	1.2	2.75001	3.5	-6.02105
		20	sp N in nitrile		Nsp	C#[N]	0	0	0	0	1	5.15	4	1.1727	20		2.8	0	1.09033	0	1.09033	7.21	9.7063	1.64178	4.13808	26.2586	13.186	0	-0.762041	0	-0.762041	19.57	18.808	4.45626	3.69422	33.5848		6.18	2.75001	18.025	-6.02105	36.75	127.075	163.825	11.5736	1.40724	2.75001	4.10445	-6.02105
		21	H2O water monomer		Osp3	[H][O][H]	2	2.8	0	0	2	4.5	0	0	21		2.8	5.6	6.69033	0	1.09033	6.3	8.7963	0	2.4963	30.9733	13.186	9.716	8.95396	0	-0.762041	17.1	16.338	0	-0.762041	50.5838		5.4	2.75001	15.75	-6.02105	26.8249	50.7338	77.5587	9.28811	0	2.75001	0	-6.02105
		22	OH in a phenol		Osp3	[H][O]c1ccccc1	1	3.8	0	0	1	3.1	2	2.15	22		2.8	7.6	8.69033	0	1.09033	4.34	6.8363	3.01	5.5063	26.5392	13.186	13.186	12.424	0	-0.762041	11.78	11.018	8.17	7.40796	38.2578		3.72	2.75001	10.85	-6.02105	13.6165	7.02137	20.6379	6.02386	2.58	2.75001	7.525	-6.02105
		23	OH in alcohol		Osp3	[H][O]C	1	2.7	0	0	1	5.3	1	3.98304	23		2.8	5.4	6.49033	0	1.09033	7.42	9.9163	5.57625	8.07255	24.4792	13.186	9.369	8.60696	0	-0.762041	20.14	19.378	15.1355	14.3735	42.3584		6.36	2.75001	18.55	-6.02105	39.5192	157.066	196.585	12.125	4.77964	2.75001	13.9406	-6.02105
		24	sp3 O in cyclic ether		Osp3	C[O;R]C	0	0	0	0	1	5.3	1	2.53032	24		2.8	0	1.09033	0	1.09033	7.42	9.9163	3.54245	6.03875	15.955	13.186	0	-0.762041	0	-0.762041	20.14	19.378	9.61522	8.85318	28.2311		6.36	2.75001	18.55	-6.02105	39.5192	157.066	196.585	12.125	3.03638	2.75001	8.85612	-6.02105
		25	sp3 O in acyclic dialkyl ether		Osp3	C[O]R	0	0	0	0	1	5.3	1	2.53032	25		2.8	0	1.09033	0	1.09033	7.42	9.9163	3.54245	6.03875	15.955	13.186	0	-0.762041	0	-0.762041	20.14	19.378	9.61522	8.85318	28.2311		6.36	2.75001	18.55	-6.02105	39.5192	157.066	196.585	12.125	3.03638	2.75001	8.85612	-6.02105
		26	lone pair on sp2 O in ketone		Osp2	lone pair electrons [O]=C(C)C	0	0	0	0	1	5.8	1	3.76689	26		2.8	0	1.09033	0	1.09033	8.12	10.6163	5.27365	7.76995	18.3862	13.186	0	-0.762041	0	-0.762041	22.04	21.278	14.3142	13.5521	34.8301		6.96	2.75001	20.3	-6.02105	50.3473	318.291	368.638	13.9763	4.52027	2.75001	13.1841	-6.02105
		27	pi orbital electrons sp2 O in ketone		Osp2	Pi electrons [O]=C(C)C	0	0	0	0	2	0.6	0	0	27		2.8	0	1.09033	0	1.09033	0.84	3.3363	0	2.4963	6.6726	13.186	0	-0.762041	0	-0.762041	2.28	1.51796	0	-0.762041	3.03592		0.72	2.75001	2.1	-6.02105	4.05719	0.205455	4.26264	3.35396	0	2.75001	0	-6.02105
		28	lone pair on sp2 O in amide		Osp2	lone pair electrons [O]=C(N)	0	0	0	0	1	8.5	1	2.73586	28		2.8	0	1.09033	0	1.09033	11.9	14.3963	3.83021	6.32651	20.7228	13.186	0	-0.762041	0	-0.762041	32.3	31.538	10.3963	9.63424	41.1722		10.2	2.75001	29.75	-6.02105	186.16	14428.7	14614.8	23.6976	3.28304	2.75001	9.57552	-6.02105
		29	pi orbital electrons sp2 O in amide		Osp2	Pi electrons [O]=C(N)	0	0	0	0	2	0.6	0	0	29		2.8	0	1.09033	0	1.09033	0.84	3.3363	0	2.4963	6.6726	13.186	0	-0.762041	0	-0.762041	2.28	1.51796	0	-0.762041	3.03592		0.72	2.75001	2.1	-6.02105	4.05719	0.205455	4.26264	3.35396	0	2.75001	0	-6.02105
		30	Single F attached to sp3 C		F	[F]C([H])	1	0.804244	0	0	1	3.1	0	0	30		2.8	1.60849	2.69882	0	1.09033	4.34	6.8363	0	2.4963	9.53512	13.186	2.79073	2.02869	0	-0.762041	11.78	11.018	0	-0.762041	13.0466		3.72	2.75001	10.85	-6.02105	13.6165	7.02137	20.6379	6.02386	0	2.75001	0	-6.02105
		31	F in perfluoroalkane (includes CF4)		F	[F]C(F)C(F)(F)	1	1.2	0	0	1	0.6	0	0	31		2.8	2.4	3.49033	0	1.09033	0.84	3.3363	0	2.4963	6.82663	13.186	4.164	3.40196	0	-0.762041	2.28	1.51796	0	-0.762041	4.91992		0.72	2.75001	2.1	-6.02105	4.05719	0.205455	4.26264	3.35396	0	2.75001	0	-6.02105
		32	F attached to benzene ring		F	[F]c1ccccc1	1	1.51735	0	0	1	1.51735	0	0	32		2.8	3.03469	4.12503	0	1.09033	2.12429	4.62059	0	2.4963	8.74561	13.186	5.26519	4.50315	0	-0.762041	5.76592	5.00388	0	-0.762041	9.50703		1.82082	2.75001	5.31071	-6.02105	6.3267	0.750746	7.07744	4.32763	0	2.75001	0	-6.02105
		33	S in dialkyl sulphide		S	C[S]C	0	0	0	0	1	3.8	3	1.38616	33		2.8	0	1.09033	0	1.09033	5.32	7.8163	1.94063	4.43693	21.1271	13.186	0	-0.762041	0	-0.762041	14.44	13.678	5.26742	4.50538	27.1941		4.56	2.75001	13.3	-6.02105	19.1119	18.8738	37.9857	7.29463	1.6634	2.75001	4.85157	-6.02105
		34	Single Cl attached to sp3 C		Cl	[Cl]CC	2	1.2	0	0	1	2.3	2	0.6	34		2.8	2.4	3.49033	0	1.09033	3.22	5.7163	0.84	3.3363	19.3696	13.186	4.164	3.40196	0	-0.762041	8.74	7.97796	2.28	1.51796	17.8178		2.76	2.75001	8.05	-6.02105	9.24267	2.26796	11.5106	5.11117	0.72	2.75001	2.1	-6.02105
		35	Cl in tetrachloromethane		Cl	[Cl]C(Cl)(Cl)Cl	2	1.4	0	0	3	0.6	0	0	35		2.8	2.8	3.89033	0	1.09033	0.84	3.3363	0	2.4963	17.7896	13.186	4.858	4.09596	0	-0.762041	2.28	1.51796	0	-0.762041	12.7458		0.72	2.75001	2.1	-6.02105	4.05719	0.205455	4.26264	3.35396	0	2.75001	0	-6.02105
		36	Cl attached to benzene ring		Cl	[Cl]c1ccccc1	2	1.5	0	0	1	0.84626	2	0.85	36		2.8	3	4.09033	0	1.09033	1.18476	3.68106	1.19	3.6863	19.2343	13.186	5.205	4.44296	0	-0.762041	3.21579	2.45375	3.23	2.46796	16.2756		1.01551	2.75001	2.96191	-6.02105	4.57112	0.290933	4.86205	3.62266	1.02	2.75001	2.975	-6.02105
			Aromatic Ring Description			Frag ID	no of alpha1 SSIP	Alpha1	No of Alpha2 SSIP	Alpha2	no of beta1 SSIP	Beta1	no of beta2 SSIP	Beta2
		A1	Default e.g Benzene			A1	0	0	0	0	1	2	0	0	A1		2.8	0	1.09033	0	1.09033	2.8	5.2963	0	2.4963	5.2963	13.186	0	-0.762041	0	-0.762041	7.6	6.83796	0	-0.762041	6.83796		2.4	2.75001	7	-6.02105	7.99276	1.48454	9.4773	4.81193	0	2.75001	0	-6.02105
		A2	Mono alkyl e.g Toluene			A2	0	0	0	0	1	2.2	0	0	A2		2.8	0	1.09033	0	1.09033	3.08	5.5763	0	2.4963	5.5763	13.186	0	-0.762041	0	-0.762041	8.36	7.59796	0	-0.762041	7.59796		2.64	2.75001	7.7	-6.02105	8.8057	1.96919	10.7749	5.01087	0	2.75001	0	-6.02105
		A3	di-alkyl e.g. xylenes			A3	0	0	0	0	1	2.4	0	0	A3		2.8	0	1.09033	0	1.09033	3.36	5.8563	0	2.4963	5.8563	13.186	0	-0.762041	0	-0.762041	9.12	8.35796	0	-0.762041	8.35796		2.88	2.75001	8.4	-6.02105	9.70133	2.61207	12.3134	5.21267	0	2.75001	0	-6.02105
		A4	s-trialkyl e.g. mesitylene			A4	0	0	0	0	1	2.7	0	0	A4		2.8	0	1.09033	0	1.09033	3.78	6.2763	0	2.4963	6.2763	13.186	0	-0.762041	0	-0.762041	10.26	9.49796	0	-0.762041	9.49796		3.24	2.75001	9.45	-6.02105	11.2184	3.99052	15.209	5.53118	0	2.75001	0	-6.02105
		A5	poly-alkyl benzene (n=4,5 or6)			A5	0	0	0	0	1	3.1	0	0	A5		2.8	0	1.09033	0	1.09033	4.34	6.8363	0	2.4963	6.8363	13.186	0	-0.762041	0	-0.762041	11.78	11.018	0	-0.762041	11.018		3.72	2.75001	10.85	-6.02105	13.6165	7.02137	20.6379	6.02386	0	2.75001	0	-6.02105
		A6	polycyclic aromatic			A6	0	0	0	0	1	1.85305	0	0	A6		2.8	0	1.09033	0	1.09033	2.59428	5.09058	0	2.4963	5.09058	13.186	0	-0.762041	0	-0.762041	7.04161	6.27957	0	-0.762041	6.27957		2.22367	2.75001	6.48569	-6.02105	7.4437	1.20627	8.64996	4.66578	0	2.75001	0	-6.02105
		A7	fluorobenzene			A7	0	0	0	0	1	1.4	0	0	A7		2.8	0	1.09033	0	1.09033	1.96	4.4563	0	2.4963	4.4563	13.186	0	-0.762041	0	-0.762041	5.32	4.55796	0	-0.762041	4.55796		1.68	2.75001	4.9	-6.02105	5.97716	0.636066	6.61322	4.20735	0	2.75001	0	-6.02105
		A8	chlorobenzene			A8	0	0	0	0	1	1.4	0	0	A8		2.8	0	1.09033	0	1.09033	1.96	4.4563	0	2.4963	4.4563	13.186	0	-0.762041	0	-0.762041	5.32	4.55796	0	-0.762041	4.55796		1.68	2.75001	4.9	-6.02105	5.97716	0.636066	6.61322	4.20735	0	2.75001	0	-6.02105
		A9	di-halobenzene			A9	0	0	0	0	1	1.05	0	0	A9		2.8	0	1.09033	0	1.09033	1.47	3.9663	0	2.4963	3.9663	13.186	0	-0.762041	0	-0.762041	3.99	3.22796	0	-0.762041	3.22796		1.26	2.75001	3.675	-6.02105	5.04518	0.387957	5.43314	3.84106	0	2.75001	0	-6.02105
		A10	phenol			A10	0	0	0	0	1	2.15	0	0	A10		2.8	0	1.09033	0	1.09033	3.01	5.5063	0	2.4963	5.5063	13.186	0	-0.762041	0	-0.762041	8.17	7.40796	0	-0.762041	7.40796		2.58	2.75001	7.525	-6.02105	8.59503	1.83491	10.4299	4.96101	0	2.75001	0	-6.02105
		A11	mono-halophenol			A11	0	0	0	0	1	1.6	0	0	A11		2.8	0	1.09033	0	1.09033	2.24	4.7363	0	2.4963	4.7363	13.186	0	-0.762041	0	-0.762041	6.08	5.31796	0	-0.762041	5.31796		1.92	2.75001	5.6	-6.02105	6.58509	0.843721	7.42881	4.41165	0	2.75001	0	-6.02105
		A12	di-halophenol			A12	0	0	0	0	1	1.25	0	0	A12		2.8	0	1.09033	0	1.09033	1.75	4.2463	0	2.4963	4.2463	13.186	0	-0.762041	0	-0.762041	4.75	3.98796	0	-0.762041	3.98796		1.5	2.75001	4.375	-6.02105	5.55833	0.514612	6.07294	4.05177	0	2.75001	0	-6.02105
		A13	pyridine			A13	0	0	0	0	1	1.6	0	0	A13		2.8	0	1.09033	0	1.09033	2.24	4.7363	0	2.4963	4.7363	13.186	0	-0.762041	0	-0.762041	6.08	5.31796	0	-0.762041	5.31796		1.92	2.75001	5.6	-6.02105	6.58509	0.843721	7.42881	4.41165	0	2.75001	0	-6.02105
		A14	monoalkyl phenol			A14	0	0	0	0	1	2.35	0	0	A14		2.8	0	1.09033	0	1.09033	3.29	5.7863	0	2.4963	5.7863	13.186	0	-0.762041	0	-0.762041	8.93	8.16796	0	-0.762041	8.16796		2.82	2.75001	8.225	-6.02105	9.46923	2.43394	11.9032	5.16173	0	2.75001	0	-6.02105
		A15	di-alkyl phenol			A15	0	0	0	0	1	2.55	0	0	A15		2.8	0	1.09033	0	1.09033	3.57	6.0663	0	2.4963	6.0663	13.186	0	-0.762041	0	-0.762041	9.69	8.92796	0	-0.762041	8.92796		3.06	2.75001	8.925	-6.02105	10.4323	3.22855	13.6609	5.36857	0	2.75001	0	-6.02105
		A16	mono-methyl pryridines			A16	0	0	0	0	1	2	0	0	A16		2.8	0	1.09033	0	1.09033	2.8	5.2963	0	2.4963	5.2963	13.186	0	-0.762041	0	-0.762041	7.6	6.83796	0	-0.762041	6.83796		2.4	2.75001	7	-6.02105	7.99276	1.48454	9.4773	4.81193	0	2.75001	0	-6.02105
		A17	di-methyl pyridines			A17	0	0	0	0	1	2.4	0	0	A17		2.8	0	1.09033	0	1.09033	3.36	5.8563	0	2.4963	5.8563	13.186	0	-0.762041	0	-0.762041	9.12	8.35796	0	-0.762041	8.35796		2.88	2.75001	8.4	-6.02105	9.70133	2.61207	12.3134	5.21267	0	2.75001	0	-6.02105
		A18	quinoline			A18	0	0	0	0	1	1.6	0	0	A18		2.8	0	1.09033	0	1.09033	2.24	4.7363	0	2.4963	4.7363	13.186	0	-0.762041	0	-0.762041	6.08	5.31796	0	-0.762041	5.31796		1.92	2.75001	5.6	-6.02105	6.58509	0.843721	7.42881	4.41165	0	2.75001	0	-6.02105
		A19	isoquinoline			A19	0	0	0	0	1	1.6	0	0	A19		2.8	0	1.09033	0	1.09033	2.24	4.7363	0	2.4963	4.7363	13.186	0	-0.762041	0	-0.762041	6.08	5.31796	0	-0.762041	5.31796		1.92	2.75001	5.6	-6.02105	6.58509	0.843721	7.42881	4.41165	0	2.75001	0	-6.02105
[truncated: 21 more columns]

## Sheet: 5 Experimental Data
				P18	NP1	P1	NP6	NP7	NP8	P2	P4	NP2	P5	P6	P3	NP9	NP10	P7	P8	P9	P10	P11	P12	P13	P14	P15	P16	P17	P19	P20	P21	P22	P23	P24	NP4	NP3	NP5	NP11
219				Expt.	Expt.	Expt.	Expt.	Expt.	Expt.	Expt.	Expt.	Expt.	Expt.	Expt.	Expt.	Expt.	Expt.	Expt.	Expt.	Expt.	Expt.	Expt.	Expt.	Expt.	Expt.	Expt.	Expt.	Expt.	Expt.	Expt.	Expt.	Expt.	Expt.	Expt.	Expt.	Expt.	Expt.	Expt.
Molecule ID	﻿Compound	SMILES	Compound Class	Water-> Octanol (wet)	Water-> Hexadecane	Water-> Diethyl Ether	Water-> CCl4	Water-> Dichloromethane	Water-> Chloroform	Water->Di-n-butyl ether	Water-> Acetonitrile	Water-> Benzene	Water-> Propionitrile	Water-> Butyronitrile	Water-> Tetrahydrofuran	Water-> 1,2-Dichloroethane	Water-> Chlorobenzene	Water-> Acetone	Water-> Butanone	Water-> Cyclohexanone	Water-> Methanol	Water-> Ethanol	Water-> Propan-1-ol	Water-> Butan-1-ol	Water-> Pentan-1-ol	Water-> Hexan-1-ol	Water-> Heptan-1-ol	Water-> Octan-1-ol(dry)	Water-> Decan-1-ol	Water-> Propan-2-ol	Water-> Butan-2-ol	Water-> 2-Methylpropan-1-ol	Water-> 2-Methylpropan-2-ol	Water-> 3-Methylbutan-1-ol	Water-> Hexane	Water-> Toluene	Water-> Cyclohexane	Water-> Perfluoroalkane
1	n-pentane	CCCCC	Alkane-Acyclic Linear	19.3404	22.0561	#N/A	23.1857	22.5011	23.1857	23.0145	18.4504	22.2158	#N/A	20.6754	23.0145	21.0748	23.585	21.0177	21.5312	21.0006	19.1921	19.8767	20.0479	21.0177	20.7895	20.9436	20.8466	20.8466	#N/A	20.2761	20.7895	#N/A	#N/A	#N/A	23.6422	22.8719	24.3838	18.5645
2	n-hexane	CCCCCC	Alkane-Acyclic Linear	22.25	25.6104	#N/A	27.3904	26.0782	26.7628	26.4775	21.5711	25.5077	23.0545	23.7391	26.5916	24.7089	27.2192	23.9102	24.766	24.3039	22.0846	23.1686	23.3968	24.3096	24.3096	24.5663	24.3096	24.3096	#N/A	23.5109	#N/A	24.4237	24.3096	24.0129	27.3334	26.4832	#N/A	21.1261
3	n-heptane	CCCCCCC	Alkane-Acyclic Linear	25.67	29.2902	#N/A	31.0417	29.8436	30.5282	30.4711	24.5948	#N/A	26.4205	27.2763	30.2429	28.1891	30.9846	27.2192	28.4743	28.0008	25.4506	26.6487	26.8199	27.6186	#N/A	27.9266	#N/A	28.0179	#N/A	26.8199	#N/A	27.5615	27.7327	27.6813	31.1558	30.2144	#N/A	24.0224
4	n-octane	CCCCCCCC	Alkane-Acyclic Linear	29.3815	33.0099	34.3963	35.1379	33.2552	34.2822	33.9969	27.3219	34.3963	29.4328	30.3456	33.9969	31.6578	34.7956	30.4597	31.7149	31.538	28.1206	30.1174	30.1174	30.6309	31.3726	#N/A	#N/A	30.8591	30.996	30.1174	#N/A	#N/A	31.3726	31.4296	34.6816	34.5104	35.252	26.5203
5	n-nonane	CCCCCCCCC	Alkane-Acyclic Linear	32.234	36.1249	#N/A	38.2244	36.2847	37.4828	#N/A	29.3815	#N/A	31.7776	32.9757	37.0263	34.459	38.0533	33.1468	34.5161	34.208	30.6936	32.3481	32.5193	#N/A	#N/A	#N/A	#N/A	#N/A	#N/A	32.9757	#N/A	#N/A	#N/A	#N/A	37.9963	37.0606	#N/A	28.6626
6	n-decane	CCCCCCCCCC	Alkane-Acyclic Linear	33.5462	39.9702	#N/A	#N/A	#N/A	#N/A	#N/A	#N/A	#N/A	#N/A	#N/A	#N/A	#N/A	#N/A	#N/A	38.4526	#N/A	#N/A	35.6001	#N/A	#N/A	#N/A	#N/A	#N/A	#N/A	#N/A	#N/A	#N/A	#N/A	#N/A	#N/A	41.8872	#N/A	#N/A	#N/A
7	n-undecane	CCCCCCCCCCC	Alkane-Acyclic Linear	37.3116	#N/A	#N/A	#N/A	#N/A	#N/A	#N/A	#N/A	#N/A	#N/A	#N/A	#N/A	#N/A	#N/A	#N/A	#N/A	#N/A	#N/A	#N/A	#N/A	#N/A	#N/A	#N/A	#N/A	#N/A	#N/A	#N/A	#N/A	#N/A	#N/A	#N/A	#N/A	#N/A	#N/A	#N/A
8	n-dodecane	CCCCCCCCCCCC	Alkane-Acyclic Linear	38.7949	#N/A	#N/A	#N/A	#N/A	#N/A	#N/A	#N/A	#N/A	#N/A	#N/A	#N/A	#N/A	#N/A	#N/A	#N/A	#N/A	#N/A	#N/A	#N/A	#N/A	#N/A	#N/A	#N/A	#N/A	#N/A	#N/A	#N/A	#N/A	#N/A	#N/A	#N/A	#N/A	#N/A	#N/A
9	n-tridecane	CCCCCCCCCCCCC	Alkane-Acyclic Linear	43.1308	#N/A	#N/A	#N/A	#N/A	#N/A	#N/A	#N/A	#N/A	#N/A	#N/A	#N/A	#N/A	#N/A	#N/A	#N/A	#N/A	#N/A	#N/A	#N/A	#N/A	#N/A	#N/A	#N/A	#N/A	#N/A	#N/A	#N/A	#N/A	#N/A	#N/A	#N/A	#N/A	#N/A	#N/A
10	n-tetradecane	CCCCCCCCCCCCCC	Alkane-Acyclic Linear	45.6411	#N/A	#N/A	#N/A	#N/A	#N/A	#N/A	#N/A	#N/A	#N/A	#N/A	#N/A	#N/A	#N/A	#N/A	#N/A	#N/A	#N/A	#N/A	#N/A	#N/A	#N/A	#N/A	#N/A	#N/A	#N/A	#N/A	#N/A	#N/A	#N/A	#N/A	#N/A	#N/A	#N/A	#N/A
11	n-pentadecane	CCCCCCCCCCCCCCC	Alkane-Acyclic Linear	#N/A	#N/A	#N/A	#N/A	#N/A	#N/A	#N/A	#N/A	#N/A	#N/A	#N/A	#N/A	#N/A	#N/A	#N/A	#N/A	#N/A	#N/A	#N/A	#N/A	#N/A	#N/A	#N/A	#N/A	#N/A	#N/A	#N/A	#N/A	#N/A	#N/A	#N/A	#N/A	#N/A	#N/A	#N/A
12	n-hexadecane	CCCCCCCCCCCCCCCC	Alkane-Acyclic Linear	#N/A	#N/A	#N/A	#N/A	#N/A	#N/A	#N/A	#N/A	#N/A	#N/A	#N/A	#N/A	#N/A	#N/A	#N/A	#N/A	#N/A	#N/A	#N/A	#N/A	#N/A	#N/A	#N/A	#N/A	#N/A	#N/A	#N/A	#N/A	#N/A	#N/A	#N/A	#N/A	#N/A	#N/A	#N/A
13	isopentane	CCC(C)C	Alkane Acyclic Branched	18.1994	21.4684	#N/A	#N/A	#N/A	#N/A	#N/A	#N/A	#N/A	#N/A	#N/A	#N/A	#N/A	#N/A	#N/A	#N/A	20.7781	#N/A	#N/A	#N/A	#N/A	#N/A	#N/A	#N/A	#N/A	#N/A	#N/A	#N/A	#N/A	20.7096	#N/A	#N/A	#N/A	#N/A	#N/A
14	2-methylpentane	CCCC(C)C	Alkane Acyclic Branched	21.2802	24.7774	#N/A	26.5289	25.2738	25.9584	#N/A	20.8808	#N/A	22.3641	23.1058	25.9013	23.8475	26.3577	23.277	24.1327	23.6364	21.651	22.8205	22.7635	23.5622	24.3039	#N/A	#N/A	#N/A	#N/A	22.8205	#N/A	#N/A	#N/A	#N/A	26.586	25.6332	#N/A	20.8323
15	3-methylpentane	CCC(C)CC	Alkane Acyclic Branched	20.5385	25.2224	#N/A	#N/A	#N/A	#N/A	#N/A	#N/A	#N/A	#N/A	#N/A	#N/A	#N/A	#N/A	#N/A	#N/A	#N/A	#N/A	#N/A	#N/A	23.8475	24.418	#N/A	#N/A	#N/A	#N/A	#N/A	#N/A	#N/A	#N/A	#N/A	#N/A	#N/A	#N/A	#N/A
16	3-methylhexane	CCCC(C)CC	Alkane Acyclic Branched	24.3039	28.7197	#N/A	#N/A	#N/A	#N/A	#N/A	#N/A	#N/A	#N/A	#N/A	#N/A	#N/A	#N/A	#N/A	#N/A	#N/A	#N/A	#N/A	#N/A	#N/A	#N/A	#N/A	#N/A	#N/A	#N/A	#N/A	#N/A	#N/A	#N/A	#N/A	#N/A	#N/A	#N/A	#N/A
17	3-ethylpentane	CCC(CC)CC	Alkane Acyclic Branched	24.3039	#N/A	#N/A	#N/A	#N/A	#N/A	#N/A	#N/A	#N/A	#N/A	#N/A	#N/A	#N/A	#N/A	#N/A	#N/A	#N/A	#N/A	#N/A	#N/A	#N/A	#N/A	#N/A	#N/A	#N/A	#N/A	#N/A	#N/A	#N/A	#N/A	#N/A	#N/A	#N/A	#N/A	#N/A
18	2,2-dimethylpentane	CCCC(C)(C)C	Alkane Acyclic Branched	24.3039	27.9894	#N/A	#N/A	#N/A	#N/A	#N/A	#N/A	#N/A	#N/A	#N/A	#N/A	#N/A	#N/A	#N/A	#N/A	#N/A	#N/A	#N/A	#N/A	#N/A	#N/A	#N/A	#N/A	#N/A	#N/A	#N/A	#N/A	#N/A	#N/A	#N/A	#N/A	#N/A	#N/A	#N/A
19	3-methylheptane	CCCCC(C)CC	Alkane Acyclic Branched	27.3847	32.4622	#N/A	#N/A	#N/A	#N/A	#N/A	#N/A	#N/A	#N/A	#N/A	#N/A	#N/A	#N/A	#N/A	#N/A	#N/A	#N/A	#N/A	#N/A	#N/A	#N/A	#N/A	#N/A	#N/A	#N/A	#N/A	#N/A	#N/A	#N/A	#N/A	#N/A	#N/A	#N/A	#N/A
20	4-methylheptane	CCCC(C)CCC	Alkane Acyclic Branched	27.3847	#N/A	#N/A	#N/A	#N/A	#N/A	#N/A	#N/A	#N/A	#N/A	#N/A	#N/A	#N/A	#N/A	#N/A	#N/A	#N/A	#N/A	#N/A	#N/A	#N/A	#N/A	#N/A	#N/A	#N/A	#N/A	#N/A	#N/A	#N/A	#N/A	#N/A	#N/A	#N/A	#N/A	#N/A
21	3-ethylhexane	CCCC(CC)CC	Alkane Acyclic Branched	27.3847	#N/A	#N/A	#N/A	#N/A	#N/A	#N/A	#N/A	#N/A	#N/A	#N/A	#N/A	#N/A	#N/A	#N/A	#N/A	#N/A	#N/A	#N/A	#N/A	#N/A	#N/A	#N/A	#N/A	#N/A	#N/A	#N/A	#N/A	#N/A	#N/A	#N/A	#N/A	#N/A	#N/A	#N/A
22	2,5-dimethylhexane	CC(C)CCC(C)C	Alkane Acyclic Branched	27.3847	30.397	#N/A	32.4052	30.9218	31.8347	#N/A	25.1597	#N/A	27.2706	28.1834	31.6635	29.2103	32.2911	28.3545	29.4385	28.9992	#N/A	#N/A	#N/A	#N/A	#N/A	#N/A	#N/A	#N/A	#N/A	27.8981	#N/A	#N/A	#N/A	#N/A	32.2912	31.3554	#N/A	25.0484
23	3,3-dimethylhexane	CCCC(C)(C)CC	Alkane Acyclic Branched	27.3847	#N/A	#N/A	#N/A	#N/A	#N/A	#N/A	#N/A	#N/A	#N/A	#N/A	#N/A	#N/A	#N/A	#N/A	#N/A	#N/A	#N/A	#N/A	#N/A	#N/A	#N/A	#N/A	#N/A	#N/A	#N/A	#N/A	#N/A	#N/A	#N/A	#N/A	#N/A	#N/A	#N/A	#N/A
24	3,4-dimethylhexane	CCC(C)C(C)CC	Alkane Acyclic Branched	27.3847	#N/A	#N/A	#N/A	#N/A	#N/A	#N/A	#N/A	#N/A	#N/A	#N/A	#N/A	#N/A	#N/A	#N/A	#N/A	#N/A	#N/A	#N/A	#N/A	#N/A	#N/A	#N/A	#N/A	#N/A	#N/A	#N/A	#N/A	#N/A	#N/A	#N/A	#N/A	#N/A	#N/A	#N/A
25	2-methyl-3-ethylpentane	CCC(CC)C(C)C	Alkane Acyclic Branched	27.3847	#N/A	#N/A	#N/A	#N/A	#N/A	#N/A	#N/A	#N/A	#N/A	#N/A	#N/A	#N/A	#N/A	#N/A	#N/A	#N/A	#N/A	#N/A	#N/A	#N/A	#N/A	#N/A	#N/A	#N/A	#N/A	#N/A	#N/A	#N/A	#N/A	#N/A	#N/A	#N/A	#N/A	#N/A
26	3-methyl-3-ethylpentane	CCC(C)(CC)CC	Alkane Acyclic Branched	27.3847	#N/A	#N/A	#N/A	#N/A	#N/A	#N/A	#N/A	#N/A	#N/A	#N/A	#N/A	#N/A	#N/A	#N/A	#N/A	#N/A	#N/A	#N/A	#N/A	#N/A	#N/A	#N/A	#N/A	#N/A	#N/A	#N/A	#N/A	#N/A	#N/A	#N/A	#N/A	#N/A	#N/A	#N/A
27	2,2,3-trimethylpentane	CCC(C)C(C)(C)C	Alkane iso-octane	27.3847	#N/A	#N/A	#N/A	#N/A	#N/A	#N/A	#N/A	#N/A	#N/A	#N/A	#N/A	#N/A	#N/A	#N/A	#N/A	#N/A	#N/A	#N/A	#N/A	#N/A	#N/A	#N/A	#N/A	#N/A	#N/A	#N/A	#N/A	#N/A	#N/A	#N/A	#N/A	#N/A	#N/A	#N/A
28	2,2,4-trimethylpentane	CC(C)CC(C)(C)C	Alkane iso-octane	27.3847	29.815	#N/A	#N/A	#N/A	#N/A	#N/A	#N/A	#N/A	#N/A	#N/A	31.5494	#N/A	#N/A	#N/A	29.0391	#N/A	#N/A	#N/A	27.4417	#N/A	28.3545	29.1076	#N/A	#N/A	28.4116	27.4988	#N/A	#N/A	27.1565	#N/A	#N/A	#N/A	#N/A	#N/A
29	2,3,3-trimethylpentane	CCC(C)(C)C(C)C	Alkane iso-octane	27.3847	#N/A	#N/A	#N/A	#N/A	#N/A	#N/A	#N/A	#N/A	#N/A	#N/A	#N/A	#N/A	#N/A	#N/A	#N/A	#N/A	#N/A	#N/A	#N/A	#N/A	#N/A	#N/A	#N/A	#N/A	#N/A	#N/A	#N/A	#N/A	#N/A	#N/A	#N/A	#N/A	#N/A	#N/A
30	2,3,4-trimethylpentane	CC(C)C(C)C(C)C	Alkane iso-octane	27.3847	30.5852	#N/A	31.9488	30.5225	31.4353	#N/A	25.0456	#N/A	26.8712	27.8981	31.2071	28.925	31.7776	28.0122	29.0962	28.7083	25.8899	27.5216	27.5558	28.4173	#N/A	#N/A	#N/A	#N/A	#N/A	27.5558	#N/A	#N/A	#N/A	#N/A	31.7207	#N/A	#N/A	24.7261
31	2,2,3,3-tetramethylbutane	CC(C)(C)C(C)(C)C	Alkane Acyclic Branched	27.3847	#N/A	#N/A	#N/A	#N/A	#N/A	#N/A	#N/A	#N/A	#N/A	#N/A	#N/A	#N/A	#N/A	#N/A	#N/A	#N/A	#N/A	#N/A	#N/A	#N/A	#N/A	#N/A	#N/A	#N/A	#N/A	#N/A	#N/A	#N/A	#N/A	#N/A	#N/A	#N/A	#N/A	#N/A
32	2-methyloctane	CCCCCCC(C)C	Alkane Acyclic Branched	#N/A	34.8926	#N/A	#N/A	#N/A	#N/A	#N/A	#N/A	#N/A	#N/A	#N/A	#N/A	#N/A	#N/A	#N/A	#N/A	#N/A	#N/A	#N/A	#N/A	#N/A	#N/A	#N/A	#N/A	#N/A	#N/A	#N/A	#N/A	#N/A	#N/A	#N/A	#N/A	#N/A	#N/A	#N/A
33	2,2,5-trimethylhexane	CC(C)CCC(C)(C)C	Alkane Acyclic Branched	30.4654	32.6163	#N/A	#N/A	#N/A	#N/A	#N/A	#N/A	#N/A	#N/A	#N/A	#N/A	#N/A	#N/A	#N/A	#N/A	#N/A	#N/A	#N/A	#N/A	#N/A	#N/A	#N/A	#N/A	#N/A	#N/A	#N/A	#N/A	#N/A	#N/A	#N/A	#N/A	#N/A	#N/A	#N/A
34	3,3-diethylpentane	CCC(CC)(CC)CC	Alkane Acyclic Branched	29.6097	32.1947	#N/A	#N/A	#N/A	#N/A	#N/A	#N/A	#N/A	#N/A	#N/A	#N/A	#N/A	#N/A	#N/A	#N/A	#N/A	27.2712	#N/A	#N/A	#N/A	#N/A	#N/A	#N/A	#N/A	#N/A	#N/A	#N/A	#N/A	#N/A	#N/A	33.8893	#N/A	#N/A	#N/A
35	2,2,4,4-tetramethylpentane	CC(C)(C)CC(C)(C)C	Alkane Acyclic Branched	#N/A	#N/A	#N/A	#N/A	#N/A	#N/A	#N/A	#N/A	#N/A	#N/A	#N/A	#N/A	#N/A	#N/A	#N/A	#N/A	#N/A	#N/A	#N/A	#N/A	#N/A	#N/A	#N/A	#N/A	#N/A	#N/A	#N/A	#N/A	#N/A	#N/A	#N/A	#N/A	#N/A	#N/A	#N/A
36	2-methylnonane	CCCCCCCC(C)C	Alkane Acyclic Branched	#N/A	38.3556	#N/A	#N/A	#N/A	#N/A	#N/A	#N/A	#N/A	#N/A	#N/A	#N/A	#N/A	#N/A	#N/A	#N/A	#N/A	#N/A	#N/A	#N/A	#N/A	#N/A	#N/A	#N/A	#N/A	#N/A	#N/A	#N/A	#N/A	#N/A	#N/A	#N/A	#N/A	#N/A	#N/A
37	cyclopentane	C1CCCC1	Alkane-Cyclic	17.1154	19.1521	#N/A	#N/A	#N/A	#N/A	#N/A	#N/A	#N/A	#N/A	#N/A	#N/A	#N/A	#N/A	#N/A	#N/A	#N/A	15.9744	16.659	17.1154	#N/A	#N/A	#N/A	17.9712	#N/A	#N/A	17.1154	#N/A	#N/A	#N/A	#N/A	20.4815	#N/A	#N/A	#N/A
38	cyclohexane	C1CCCCC1	Alkane-Cyclic	19.6257	22.0447	22.6494	23.5052	22.3071	23.7334	22.3071	#N/A	22.0789	19.4545	20.3673	22.9974	21.052	23.5622	19.968	20.8238	21.1775	18.9981	19.6827	19.6827	20.7096	20.6526	20.8238	20.7096	20.5955	19.4203	19.5686	20.3673	21.2802	20.4814	#N/A	22.8206	#N/A	23.6763	16.3081
39	cycloheptane	C1CCCCCC1	Alkane-Cyclic	22.8205	#N/A	#N/A	#N/A	#N/A	#N/A	#N/A	#N/A	#N/A	#N/A	#N/A	#N/A	#N/A	#N/A	#N/A	#N/A	#N/A	#N/A	#N/A	#N/A	#N/A	#N/A	#N/A	#N/A	#N/A	#N/A	#N/A	#N/A	#N/A	#N/A	#N/A	#N/A	#N/A	#N/A	#N/A
40	cyclooctane	C1CCCCCCC1	Alkane-Cyclic	25.3879	28.2918	#N/A	#N/A	#N/A	#N/A	#N/A	#N/A	#N/A	#N/A	#N/A	#N/A	#N/A	#N/A	#N/A	#N/A	#N/A	#N/A	#N/A	#N/A	#N/A	#N/A	#N/A	#N/A	#N/A	#N/A	#N/A	#N/A	#N/A	#N/A	#N/A	#N/A	#N/A	#N/A	#N/A
41	cis-decahydronaphthalene	C1CCC2CCCCC2C1	Alkane-Cyclic	#N/A	#N/A	#N/A	#N/A	#N/A	#N/A	#N/A	#N/A	#N/A	#N/A	#N/A	#N/A	#N/A	#N/A	#N/A	#N/A	#N/A	#N/A	#N/A	#N/A	#N/A	#N/A	#N/A	#N/A	#N/A	#N/A	#N/A	#N/A	#N/A	#N/A	#N/A	#N/A	#N/A	#N/A	#N/A
42	trans-decahydronaphtalene	C1CCCC2([H])CCCCC12[H]	Alkane-Cyclic	#N/A	#N/A	#N/A	#N/A	#N/A	#N/A	#N/A	#N/A	#N/A	#N/A	#N/A	#N/A	#N/A	#N/A	#N/A	#N/A	#N/A	#N/A	#N/A	#N/A	#N/A	#N/A	#N/A	#N/A	#N/A	#N/A	#N/A	#N/A	#N/A	#N/A	#N/A	#N/A	#N/A	#N/A	#N/A
43	methylcyclopentane	CC1CCCC1	Alkane-Cyclic Branched	19.2263	23.2598	#N/A	#N/A	#N/A	#N/A	#N/A	#N/A	#N/A	#N/A	#N/A	#N/A	#N/A	#N/A	#N/A	#N/A	#N/A	#N/A	#N/A	#N/A	#N/A	21.3372	#N/A	21.3372	#N/A	#N/A	#N/A	#N/A	#N/A	#N/A	#N/A	#N/A	#N/A	#N/A	#N/A
44	methylcyclohexane	CC1CCCCC1	Alkane-Cyclic Branched	22.1359	26.0668	#N/A	#N/A	#N/A	#N/A	#N/A	#N/A	#N/A	23.3911	24.1898	26.643	#N/A	#N/A	23.5622	24.3609	#N/A	#N/A	#N/A	#N/A	#N/A	#N/A	#N/A	24.5321	24.5321	#N/A	22.9917	#N/A	#N/A	#N/A	#N/A	#N/A	#N/A	#N/A	#N/A
45	ethylcyclohexane	CCC1CCCCC1	Alkane-Cyclic Branched	26.0154	31.1329	#N/A	32.2911	30.8077	31.7776	#N/A	25.3879	#N/A	27.0994	28.1263	31.3783	29.3815	32.177	27.9552	29.1533	29.2559	25.907	27.6528	27.727	28.6512	#N/A	#N/A	#N/A	#N/A	#N/A	27.6699	#N/A	#N/A	#N/A	#N/A	31.6636	#N/A	#N/A	23.6392
46	cis-1,2-dimethylcyclohexane	C[C@@H]1([C@@H](CCCC1)(C))	Alkane-Cyclic Branched	25.3308	28.6227	#N/A	#N/A	#N/A	#N/A	#N/A	#N/A	#N/A	#N/A	#N/A	#N/A	#N/A	#N/A	#N/A	#N/A	#N/A	#N/A	#N/A	#N/A	#N/A	#N/A	#N/A	#N/A	#N/A	#N/A	#N/A	#N/A	#N/A	#N/A	#N/A	#N/A	#N/A	#N/A	#N/A
47	trans-1,4-dimethylcyclohexane	CC1CCC(C)CC1	Alkane-Cyclic Branched	25.1597	28.7482	#N/A	#N/A	#N/A	#N/A	#N/A	#N/A	#N/A	#N/A	#N/A	#N/A	#N/A	#N/A	#N/A	#N/A	#N/A	#N/A	#N/A	#N/A	#N/A	#N/A	#N/A	#N/A	#N/A	#N/A	#N/A	#N/A	#N/A	#N/A	#N/A	#N/A	#N/A	#N/A	#N/A
48	tetrachloromethane	[Cl]C([Cl])([Cl])[Cl]	Chlorosolvent-CCl4	16.1455	16.4479	18.7129	18.827	#N/A	18.884	17.743	15.6321	#N/A	16.659	#N/A	19.7968	17.6859	#N/A	17.6859	17.6859	18.4105	15.518	16.0314	16.0314	16.5449	#N/A	16.3852	#N/A	16.2596	#N/A	#N/A	#N/A	#N/A	15.9744	#N/A	17.629	#N/A	#N/A	#N/A
49	benzene	c1ccccc1	Benzene	11.8667	12.3003	#N/A	14.8904	16.4878	15.7462	13.5782	13.8635	15.4609	14.8334	14.8334	16.2596	15.3468	14.8904	14.7193	15.1757	15.2156	12.209	12.266	12.266	12.7795	12.5513	#N/A	12.4372	12.3801	11.4388	11.6385	12.209	11.9237	11.9237	#N/A	13.1789	15.0502	13.1076	#N/A
50	water	O([H])[H]	Water	-7.87309	-25.3593	#N/A	-23.1058	-15.6891	-17.9712	#N/A	#N/A	-19.6257	#N/A	#N/A	-10.1471	#N/A	#N/A	-8.39709	#N/A	#N/A	-3.53719	-5.53398	#N/A	#N/A	#N/A	#N/A	#N/A	#N/A	#N/A	-7.31709	#N/A	#N/A	#N/A	#N/A	-23.6763	-19.6827	-25.1026	-24.8744
51	methanol	CO	Alcohol-Methanol	-4.30738	-15.8032	-7.18847	-12.7795	-8.27245	-7.58783	-10.2692	-4.62116	-10.5545	#N/A	-6.04745	-5.13462	-9.01412	-11.8096	-4.05065	-5.30578	#N/A	-0.798719	-1.93975	-3.36603	-4.1077	-3.82244	#N/A	#N/A	-5.13462	-6.90322	-2.62436	-2.56731	-3.30898	-1.9968	-3.83385	-14.7877	-12.209	-15.7842	#N/A
52	ethanol	CCO	Alcohol-Primary	-1.74007	-12.4657	#N/A	-9.18527	-5.41988	-4.96347	-7.30258	-2.79552	-6.61796	#N/A	-3.76539	-1.8827	-5.93334	-7.87309	-2.45321	-2.85257	-2.89821	1.25513	0.342308	-0.912822	-0.627565	-1.48334	#N/A	#N/A	-2.68141	-3.80533	-0.684616	#N/A	-0.912822	0.171154	-0.912822	-11.3988	-7.01732	-11.0965	-14.3998
53	propan-1-ol	CCCO	Alcohol-Primary	1.42628	-8.72316	#N/A	-5.53398	#N/A	-1.71154	#N/A	#N/A	-4.1077	#N/A	-0.798719	1.36923	-2.33911	-4.27885	#N/A	0.456411	#N/A	4.56411	3.65129	2.39616	#N/A	2.39616	#N/A	#N/A	0.684616	-0.256731	2.62436	#N/A	2.45321	2.90962	#N/A	-7.69617	-4.79232	-8.52348	-13.0534
54	butan-1-ol	CCCCO	Alcohol-Primary	4.79232	-4.90071	#N/A	-1.14103	#N/A	2.39616	-0.171154	#N/A	-1.14103	#N/A	2.68141	#N/A	0.855771	-0.39936	#N/A	3.93654	#N/A	6.27565	#N/A	5.76219	5.76219	5.64809	#N/A	#N/A	4.16475	4.19328	5.76219	5.76219	5.87629	6.56091	#N/A	-4.09622	-1.71154	-4.25033	-10.3377
55	pentan-1-ol	CCCCCO	Alcohol-Primary	8.61476	-1.39205	#N/A	2.28205	#N/A	5.99039	#N/A	#N/A	2.225	#N/A	#N/A	#N/A	4.1077	2.85257	#N/A	#N/A	#N/A	9.01412	#N/A	9.24232	9.18527	9.12822	8.84296	#N/A	7.64488	7.59354	9.47053	#N/A	9.52758	9.98399	#N/A	0.211178	2.51026	-2.34861	#N/A
56	hexan-1-ol	CCCCCCO	Alcohol-Primary	11.5814	2.16795	#N/A	5.59103	#N/A	9.64168	#N/A	#N/A	7.24552	#N/A	8.55771	#N/A	6.96027	6.78911	#N/A	10.6686	#N/A	11.7526	#N/A	#N/A	#N/A	#N/A	11.4673	#N/A	11.125	10.8055	#N/A	#N/A	#N/A	#N/A	#N/A	2.556	7.18847	2.60535	#N/A
57	heptan-1-ol	CCCCCCCO	Alcohol-Primary	14.9475	5.84777	#N/A	8.95707	#N/A	13.7494	#N/A	#N/A	11.0109	#N/A	12.7795	#N/A	10.7827	10.6116	#N/A	#N/A	#N/A	14.1487	#N/A	#N/A	#N/A	#N/A	16.1455	15.478	#N/A	#N/A	#N/A	#N/A	#N/A	#N/A	#N/A	5.75659	10.6116	6.2186	#N/A
58	octan-1-ol	CCCCCCCCO	Alcohol-Primary	17.5148	9.23662	#N/A	11.9237	#N/A	#N/A	#N/A	#N/A	16.6019	#N/A	15.3468	#N/A	#N/A	#N/A	#N/A	17.1725	#N/A	16.4878	#N/A	#N/A	#N/A	#N/A	18.7699	#N/A	17.2866	#N/A	#N/A	#N/A	#N/A	#N/A	#N/A	#N/A	#N/A	#N/A	#N/A
59	nonan-1-ol	CCCCCCCCCO	Alcohol-Primary	21.5084	12.9507	#N/A	#N/A	#N/A	#N/A	#N/A	#N/A	#N/A	#N/A	#N/A	#N/A	#N/A	#N/A	#N/A	#N/A	#N/A	19.3975	#N/A	#N/A	#N/A	#N/A	#N/A	#N/A	#N/A	21.2231	#N/A	#N/A	#N/A	#N/A	#N/A	#N/A	#N/A	#N/A	#N/A
60	decan-1-ol	CCCCCCCCCCO	Alcohol-Primary	23.5052	16.7731	#N/A	#N/A	#N/A	#N/A	#N/A	#N/A	#N/A	#N/A	#N/A	#N/A	#N/A	#N/A	#N/A	#N/A	#N/A	#N/A	#N/A	25.4449	#N/A	#N/A	#N/A	#N/A	#N/A	24.8744	25.6161	#N/A	#N/A	#N/A	#N/A	16.9444	#N/A	#N/A	#N/A
61	dimethylether	COC	Ether-Dimethyl	0.570514	-0.656091	#N/A	#N/A	#N/A	#N/A	#N/A	#N/A	#N/A	#N/A	#N/A	#N/A	#N/A	1.14103	#N/A	#N/A	#N/A	1.65449	#N/A	#N/A	0.570514	0.285257	#N/A	#N/A	-0.171154	#N/A	0.912822	0.798719	0.798719	1.42628	0.325193	-0.496313	#N/A	#N/A	#N/A
62	diethyl ether	CCOCC	Ether-Dialkyl	5.07757	4.19328	7.75899	7.41668	9.07117	10.0981	6.56091	#N/A	#N/A	#N/A	#N/A	7.35963	7.07437	9.58463	6.27565	#N/A	#N/A	6.3327	#N/A	#N/A	5.64809	5.76219	#N/A	#N/A	5.19168	4.96347	#N/A	#N/A	#N/A	#N/A	#N/A	#N/A	#N/A	5.36283	1.04404
63	dipropylether	CCCOCCC	Ether-Dialkyl	11.5814	11.7184	#N/A	15.0616	15.8603	#N/A	#N/A	#N/A	#N/A	#N/A	#N/A	#N/A	#N/A	#N/A	#N/A	13.1218	#N/A	11.3532	#N/A	#N/A	12.1519	#N/A	12.0949	#N/A	11.8096	#N/A	11.6955	12.209	12.3231	12.1519	#N/A	#N/A	#N/A	#N/A	6.73206
64	dibutylether	CCCCOCCCC	Ether-Dialkyl	18.3135	18.9068	#N/A	22.7635	#N/A	#N/A	19.4545	#N/A	#N/A	#N/A	#N/A	22.1473	21.5084	#N/A	#N/A	#N/A	#N/A	17.2866	#N/A	#N/A	18.884	#N/A	#N/A	#N/A	18.7129	#N/A	#N/A	#N/A	#N/A	#N/A	#N/A	21.246	#N/A	#N/A	13.0819
65	dipentylether	CCCCCOCCCCC	Ether-Dialkyl	#N/A	#N/A	#N/A	#N/A	#N/A	#N/A	#N/A	#N/A	#N/A	#N/A	#N/A	#N/A	#N/A	#N/A	#N/A	#N/A	#N/A	#N/A	#N/A	#N/A	#N/A	#N/A	#N/A	#N/A	#N/A	#N/A	#N/A	#N/A	#N/A	#N/A	#N/A	#N/A	#N/A	#N/A	#N/A
66	dihexylether	CCCCCCOCCCCCC	Ether-Dialkyl	#N/A	#N/A	#N/A	#N/A	#N/A	#N/A	#N/A	#N/A	#N/A	#N/A	#N/A	#N/A	#N/A	#N/A	#N/A	#N/A	#N/A	#N/A	#N/A	#N/A	#N/A	#N/A	#N/A	#N/A	#N/A	#N/A	#N/A	#N/A	#N/A	#N/A	#N/A	#N/A	#N/A	#N/A	#N/A
67	chlorobenzene	[Cl]c1ccccc1	Benzene-Chloro	16.4878	16.1855	#N/A	18.9411	20.025	19.3975	#N/A	#N/A	#N/A	#N/A	#N/A	20.5955	#N/A	19.1693	18.9411	#N/A	#N/A	16.2596	16.3167	#N/A	#N/A	17.1154	#N/A	#N/A	#N/A	#N/A	15.9173	16.6019	16.6019	16.3737	16.7503	17.1155	#N/A	16.5877	#N/A
68	1,2-dichlorobenzene	[Cl]c1ccccc1[Cl]	Benzene-Dichloro	19.5686	20.0707	#N/A	22.7064	#N/A	#N/A	#N/A	#N/A	#N/A	#N/A	#N/A	24.0186	#N/A	#N/A	#N/A	#N/A	#N/A	#N/A	#N/A	#N/A	#N/A	#N/A	#N/A	#N/A	19.1693	#N/A	#N/A	#N/A	#N/A	#N/A	#N/A	19.9681	#N/A	19.4545	#N/A
69	1,2-dichloroethane	[Cl]CC[Cl]	Chlorosolvent-CH2ClCH2Cl	8.4436	7.20559	11.125	10.4975	#N/A	12.1519	9.92694	#N/A	#N/A	#N/A	#N/A	13.4641	12.3231	#N/A	#N/A	12.5513	#N/A	#N/A	#N/A	#N/A	9.18527	#N/A	#N/A	#N/A	8.38655	#N/A	#N/A	#N/A	#N/A	#N/A	#N/A	8.21547	#N/A	#N/A	#N/A
70	methane	C	Alkane-Methane	6.2186	6.49815	8.45501	7.54219	#N/A	#N/A	#N/A	#N/A	#N/A	#N/A	#N/A	7.31399	#N/A	6.45822	7.08578	#N/A	#N/A	6.80052	6.68642	6.68642	6.57232	6.45822	6.37264	6.327	6.17296	6.01321	6.45822	#N/A	#N/A	#N/A	#N/A	8.19828	#N/A	#N/A	8.07847
71	ethane	CC	Alkane-Acyclic Linear	10.3263	10.429	12.4714	11.7868	#N/A	#N/A	#N/A	#N/A	#N/A	#N/A	#N/A	11.1592	#N/A	10.9881	10.4746	#N/A	9.82995	9.79002	10.1323	10.1894	10.2464	10.1323	10.0582	10.1323	10.0182	#N/A	10.3605	10.1894	10.3035	10.4746	#N/A	11.9409	#N/A	#N/A	9.76149
72	propane	CCC	Alkane-Acyclic Linear	13.4641	14.183	#N/A	15.8375	#N/A	#N/A	#N/A	#N/A	#N/A	#N/A	#N/A	#N/A	#N/A	14.9246	13.8977	#N/A	#N/A	12.9849	13.3843	13.7266	13.8407	13.7266	#N/A	13.156	13.7266	#N/A	13.2701	#N/A	13.7266	14.0118	13.7437	15.7234	#N/A	16.9214	12.5627
73	butane	CCCC	Alkane-Acyclic Linear	16.4878	17.8856	#N/A	19.8539	#N/A	#N/A	18.884	#N/A	#N/A	#N/A	#N/A	#N/A	#N/A	18.3705	17.5718	18.3135	#N/A	15.9173	16.659	16.9443	16.4878	17.1725	#N/A	16.8302	17.4007	#N/A	17.1725	#N/A	17.1725	17.3436	17.1154	19.3405	#N/A	20.6526	#N/A
74	trimethylamine	CN(C)C	Amine-Tertiary	1.08398	-4.16475	-3.53719	-1.31218	#N/A	2.90962	#N/A	#N/A	-1.71154	#N/A	#N/A	#N/A	#N/A	-1.71154	-2.68141	#N/A	#N/A	#N/A	1.82564	1.19808	-1.25513	#N/A	#N/A	#N/A	-2.33911	#N/A	#N/A	#N/A	#N/A	#N/A	#N/A	-2.41893	-2.05385	-2.39616	#N/A
75	triethylamine	CCN(CC)CC	Amine-Tertiary	8.27245	3.87949	5.13462	6.73206	#N/A	10.6116	#N/A	#N/A	#N/A	#N/A	#N/A	5.76219	4.84937	5.64809	3.48013	3.93654	3.73116	8.4436	6.90322	6.50386	6.84616	7.30258	#N/A	#N/A	#N/A	#N/A	5.41988	6.67501	#N/A	#N/A	#N/A	5.30586	#N/A	#N/A	#N/A
76	tripropylamine	CCCN(CCC)CCC	Amine-Tertiary	15.9173	#N/A	#N/A	#N/A	#N/A	#N/A	#N/A	#N/A	#N/A	#N/A	#N/A	#N/A	#N/A	#N/A	#N/A	#N/A	#N/A	#N/A	#N/A	#N/A	#N/A	#N/A	#N/A	#N/A	#N/A	#N/A	#N/A	#N/A	#N/A	#N/A	#N/A	#N/A	#N/A	#N/A	#N/A
77	tributylamine	CCCCN(CCCC)CCCC	Amine-Tertiary	26.2436	#N/A	#N/A	#N/A	#N/A	#N/A	#N/A	#N/A	#N/A	#N/A	#N/A	#N/A	#N/A	#N/A	#N/A	#N/A	#N/A	#N/A	#N/A	#N/A	#N/A	#N/A	#N/A	#N/A	#N/A	#N/A	#N/A	#N/A	#N/A	#N/A	#N/A	#N/A	#N/A	#N/A	#N/A
78	piperidine	C1CCNCC1	Amine-Secondary Cyclic	4.79232	-3.73686	#N/A	#N/A	#N/A	5.36283	#N/A	#N/A	-0.228205	#N/A	#N/A	0.570514	#N/A	#N/A	#N/A	#N/A	#N/A	#N/A	#N/A	#N/A	#N/A	#N/A	#N/A	#N/A	1.76859	#N/A	#N/A	#N/A	#N/A	#N/A	#N/A	#N/A	#N/A	#N/A	#N/A
79	diethylamine	CCNCC	Amine-Secondary	3.30898	-3.39456	#N/A	0.171154	#N/A	4.50706	#N/A	#N/A	-0.228205	#N/A	#N/A	#N/A	-0.342308	#N/A	-1.36923	#N/A	#N/A	4.2218	#N/A	#N/A	#N/A	#N/A	#N/A	#N/A	#N/A	#N/A	#N/A	#N/A	#N/A	#N/A	#N/A	-2.11083	-1.36923	-2.33911	#N/A
80	dipropylamine	CCCNCCC	Amine-Secondary	9.52758	3.82815	#N/A	#N/A	#N/A	#N/A	#N/A	#N/A	5.99039	#N/A	#N/A	#N/A	#N/A	#N/A	#N/A	#N/A	#N/A	#N/A	#N/A	#N/A	#N/A	#N/A	#N/A	#N/A	#N/A	#N/A	#N/A	#N/A	#N/A	#N/A	#N/A	#N/A	6.61796	#N/A	#N/A
81	dibutylamine	CCCCNCCCC	Amine-Secondary	16.1455	11.2334	#N/A	#N/A	#N/A	#N/A	#N/A	#N/A	#N/A	#N/A	#N/A	#N/A	#N/A	#N/A	#N/A	#N/A	#N/A	#N/A	#N/A	#N/A	#N/A	#N/A	#N/A	#N/A	#N/A	#N/A	#N/A	#N/A	#N/A	#N/A	#N/A	#N/A	#N/A	#N/A	#N/A
82	methylamine	CN	Amine-Primary	-3.25193	-11.6385	#N/A	-9.29937	#N/A	-5.81924	#N/A	#N/A	-7.93014	#N/A	#N/A	#N/A	#N/A	-10.041	#N/A	#N/A	#N/A	#N/A	#N/A	#N/A	-6.96027	#N/A	#N/A	#N/A	-8.2154	#N/A	#N/A	#N/A	#N/A	#N/A	#N/A	-12.1976	-7.98719	#N/A	#N/A
83	ethylamine	CCN	Amine-Primary	-0.741668	-9.25944	#N/A	-7.24552	#N/A	-1.9968	#N/A	#N/A	-7.41668	#N/A	#N/A	#N/A	-5.47693	-3.13783	#N/A	#N/A	#N/A	#N/A	#N/A	#N/A	#N/A	#N/A	#N/A	#N/A	#N/A	#N/A	#N/A	#N/A	#N/A	#N/A	#N/A	-9.24228	-7.64488	-10.2027	#N/A
84	n-propylamine	CCCN	Amine-Primary	2.73847	-6.15584	#N/A	-3.36603	#N/A	1.42628	-6.16155	#N/A	-2.96667	#N/A	#N/A	#N/A	-1.48334	-3.36603	#N/A	#N/A	#N/A	#N/A	#N/A	#N/A	#N/A	#N/A	#N/A	#N/A	#N/A	#N/A	#N/A	#N/A	#N/A	#N/A	#N/A	-5.47687	-3.70834	-5.60244	#N/A
85	n-butylamine	CCCCN	Amine-Primary	5.53398	-2.80693	#N/A	0.228205	#N/A	4.27885	-2.45321	#N/A	0.342308	#N/A	#N/A	#N/A	1.02692	-0.285257	#N/A	#N/A	#N/A	#N/A	#N/A	#N/A	#N/A	#N/A	#N/A	#N/A	2.85257	#N/A	#N/A	#N/A	#N/A	#N/A	#N/A	#N/A	0.798719	-2.78601	#N/A
86	pentylamine	CCCCCN	Amine-Primary	8.50065	0.793014	#N/A	#N/A	#N/A	#N/A	#N/A	#N/A	#N/A	#N/A	#N/A	#N/A	#N/A	#N/A	#N/A	#N/A	#N/A	#N/A	#N/A	#N/A	#N/A	#N/A	#N/A	#N/A	#N/A	#N/A	#N/A	#N/A	#N/A	#N/A	#N/A	#N/A	#N/A	#N/A	#N/A
87	hexylamine	CCCCCCN	Amine-Primary	11.7526	4.30738	#N/A	#N/A	#N/A	#N/A	#N/A	#N/A	#N/A	#N/A	#N/A	#N/A	#N/A	#N/A	#N/A	#N/A	#N/A	#N/A	#N/A	#N/A	#N/A	#N/A	#N/A	#N/A	#N/A	#N/A	#N/A	#N/A	#N/A	#N/A	#N/A	#N/A	#N/A	#N/A	#N/A
88	heptylamine	CCCCCCCN	Amine-Primary	14.6622	7.83315	#N/A	#N/A	#N/A	#N/A	#N/A	#N/A	#N/A	#N/A	#N/A	#N/A	#N/A	#N/A	#N/A	#N/A	#N/A	#N/A	#N/A	#N/A	#N/A	#N/A	#N/A	#N/A	#N/A	#N/A	#N/A	#N/A	#N/A	#N/A	#N/A	#N/A	#N/A	#N/A	#N/A
89	n-octylamine	CCCCCCCCN	Amine-Primary	17.6289	10.9539	#N/A	#N/A	#N/A	#N/A	#N/A	#N/A	#N/A	#N/A	#N/A	#N/A	#N/A	#N/A	#N/A	#N/A	#N/A	#N/A	#N/A	#N/A	#N/A	#N/A	#N/A	#N/A	#N/A	#N/A	#N/A	#N/A	#N/A	#N/A	#N/A	#N/A	#N/A	#N/A	#N/A
90	nonylamine	CCCCCCCCCN	Amine-Primary	20.5385	#N/A	#N/A	#N/A	#N/A	#N/A	#N/A	#N/A	#N/A	#N/A	#N/A	#N/A	#N/A	#N/A	#N/A	#N/A	#N/A	#N/A	#N/A	#N/A	#N/A	#N/A	#N/A	#N/A	#N/A	#N/A	#N/A	#N/A	#N/A	#N/A	#N/A	#N/A	#N/A	#N/A	#N/A
91	c-hexylamine	NC1CCCCC1	Amine-Primary	8.50065	2.43039	#N/A	#N/A	#N/A	#N/A	#N/A	#N/A	#N/A	#N/A	#N/A	#N/A	#N/A	#N/A	#N/A	#N/A	#N/A	#N/A	#N/A	#N/A	#N/A	#N/A	#N/A	#N/A	#N/A	#N/A	#N/A	#N/A	#N/A	#N/A	#N/A	#N/A	#N/A	#N/A	#N/A
92	chlorocyclohexane	[Cl]C1CCCCC1	Alkane-Monochloro	#N/A	#N/A	#N/A	#N/A	#N/A	#N/A	#N/A	#N/A	#N/A	#N/A	#N/A	#N/A	#N/A	#N/A	#N/A	#N/A	#N/A	#N/A	#N/A	#N/A	#N/A	#N/A	#N/A	#N/A	#N/A	#N/A	#N/A	#N/A	#N/A	#N/A	#N/A	#N/A	#N/A	#N/A	#N/A
93	ethyl benzene	CCc1ccccc1	Benzene-Alkyl Substituted	17.9712	18.245	#N/A	20.4244	#N/A	21.109	#N/A	#N/A	#N/A	#N/A	20.3673	21.9648	#N/A	21.109	#N/A	20.3103	#N/A	17.1154	16.7161	17.3094	17.5034	17.6631	17.8	#N/A	17.9141	#N/A	16.8302	#N/A	17.4007	17.5718	#N/A	19.0667	#N/A	17.9141	#N/A
94	decyl benzene	CCCCCCCCCCc1ccccc1	Benzene-Alkyl Substituted	41.9328	#N/A	#N/A	#N/A	#N/A	#N/A	#N/A	#N/A	#N/A	#N/A	#N/A	#N/A	#N/A	#N/A	#N/A	#N/A	#N/A	#N/A	#N/A	#N/A	#N/A	#N/A	#N/A	#N/A	#N/A	#N/A	#N/A	#N/A	#N/A	#N/A	#N/A	#N/A	#N/A	#N/A	#N/A
95	toluene	Cc1ccccc1	Benzene-Methyl substituted	15.575	15.2612	17.5148	18.0853	19.2263	19.4545	16.7161	16.1455	18.5417	17.6289	17.4007	19.0552	18.4846	18.0853	17.1154	17.6289	17.937	14.491	15.0045	15.1757	15.1757	15.0616	15.2441	#N/A	15.1757	#N/A	14.6052	#N/A	14.5481	14.7193	15.1186	16.1456	#N/A	16.3737	9.2138
96	o-xylene	Cc1ccccc1C	Benzene-Methyl substituted	17.8	18.7071	#N/A	22.0789	#N/A	22.3071	#N/A	#N/A	#N/A	#N/A	#N/A	#N/A	21.8507	#N/A	#N/A	#N/A	#N/A	#N/A	#N/A	#N/A	#N/A	17.9141	#N/A	#N/A	18.4846	#N/A	#N/A	#N/A	#N/A	#N/A	#N/A	#N/A	21.8222	18.9411	#N/A
97	m-xylene	Cc1cccc(C)c1	Benzene-Methyl substituted	18.2564	18.4219	#N/A	20.3673	#N/A	20.9949	#N/A	#N/A	#N/A	#N/A	#N/A	#N/A	21.5084	#N/A	#N/A	#N/A	#N/A	#N/A	#N/A	#N/A	#N/A	#N/A	#N/A	#N/A	18.1423	#N/A	#N/A	#N/A	#N/A	#N/A	#N/A	#N/A	#N/A	19.0932	#N/A
98	p-xylene	Cc1ccc(C)cc1	Benzene-Methyl substituted	17.9712	18.536	#N/A	20.5955	#N/A	#N/A	#N/A	#N/A	#N/A	#N/A	#N/A	#N/A	21.5654	#N/A	#N/A	#N/A	#N/A	#N/A	17.9141	#N/A	#N/A	#N/A	#N/A	#N/A	18.2564	#N/A	#N/A	#N/A	17.2866	#N/A	#N/A	#N/A	#N/A	18.6843	#N/A
99	mesitylene	Cc1cc(C)cc(C)c1	Benzene-Methyl substituted	19.5116	21.0177	#N/A	#N/A	#N/A	#N/A	#N/A	#N/A	#N/A	#N/A	#N/A	#N/A	#N/A	#N/A	#N/A	#N/A	#N/A	#N/A	#N/A	#N/A	#N/A	#N/A	#N/A	#N/A	#N/A	#N/A	#N/A	#N/A	#N/A	#N/A	#N/A	#N/A	#N/A	#N/A	#N/A
100	1,2,4,5-tetramethylbenzene	Cc1cc(C)c(C)cc1C	Benzene-Methyl substituted	23.3911	25.6674	27.6813	#N/A	#N/A	#N/A	27.0538	#N/A	#N/A	#N/A	#N/A	#N/A	#N/A	#N/A	#N/A	#N/A	#N/A	22.8034	23.8988	24.3381	25.0513	25.0513	25.2167	25.3251	#N/A	25.5932	24.1156	24.6747	24.224	24.6747	24.7032	27.265	#N/A	#N/A	#N/A
101	hexamethylbenzene	Cc1c(C)c(C)c(C)c(C)c1C	Benzene-Methyl substituted	28.3831	#N/A	#N/A	#N/A	#N/A	#N/A	#N/A	#N/A	#N/A	#N/A	#N/A	#N/A	#N/A	#N/A	#N/A	#N/A	#N/A	#N/A	#N/A	#N/A	#N/A	#N/A	#N/A	#N/A	#N/A	#N/A	#N/A	#N/A	#N/A	#N/A	#N/A	#N/A	#N/A	#N/A	#N/A
102	pentamethylbenzene	Cc1cc(C)c(C)c(C)c1C	Benzene-Methyl substituted	26.0154	#N/A	#N/A	#N/A	#N/A	#N/A	#N/A	#N/A	#N/A	#N/A	#N/A	#N/A	#N/A	#N/A	#N/A	#N/A	#N/A	#N/A	#N/A	#N/A	#N/A	#N/A	#N/A	#N/A	#N/A	#N/A	#N/A	#N/A	#N/A	#N/A	#N/A	#N/A	#N/A	#N/A	#N/A
103	propanone	CC(C)=O	Ketone-Dialkyl	-1.36923	-6.46963	-1.48334	-2.56731	3.19488	2.62436	-3.30898	1.76859	-0.285257	#N/A	#N/A	0.114103	1.71154	-0.969873	1.19808	0.513462	-0.233911	0.342308	-0.342308	#N/A	-1.48334	-1.93975	#N/A	#N/A	-2.96667	#N/A	-2.1109	#N/A	#N/A	#N/A	#N/A	-4.9463	-1.14103	-5.40847	#N/A
104	butanone	CCC(C)=O	Ketone-Dialkyl	1.65449	-2.47032	1.76859	1.54039	6.50386	6.56091	0.0570514	4.3359	3.13783	#N/A	3.76539	3.48013	5.24873	3.25193	3.9936	3.65129	3.27475	3.53719	2.51026	1.9968	1.71154	0.741668	0.696027	#N/A	0.285257	#N/A	1.54039	1.8827	1.54039	2.225	1.65449	-1.31212	2.33911	-1.40346	-5.45982
105	pentan-2-one	CCCC(C)=O	Ketone-Dialkyl	4.79232	0.998399	#N/A	5.36283	#N/A	#N/A	#N/A	#N/A	6.78911	#N/A	#N/A	#N/A	#N/A	7.35963	#N/A	#N/A	#N/A	5.70514	#N/A	#N/A	#N/A	#N/A	#N/A	#N/A	3.48013	#N/A	#N/A	#N/A	#N/A	#N/A	#N/A	#N/A	6.27565	2.28205	#N/A
106	pentan-3-one	CCC(=O)CC	Ketone-Dialkyl	4.67821	1.7743	#N/A	#N/A	#N/A	#N/A	#N/A	#N/A	#N/A	#N/A	#N/A	#N/A	#N/A	#N/A	#N/A	#N/A	#N/A	#N/A	#N/A	#N/A	#N/A	#N/A	#N/A	#N/A	3.9936	#N/A	#N/A	#N/A	#N/A	#N/A	#N/A	#N/A	#N/A	3.70834	#N/A
107	hexan-2-one	CCCCC(C)=O	Ketone-Dialkyl	7.87309	4.9977	#N/A	8.67181	#N/A	#N/A	#N/A	#N/A	10.3263	#N/A	#N/A	#N/A	#N/A	10.6686	#N/A	#N/A	#N/A	8.04424	#N/A	#N/A	#N/A	#N/A	#N/A	#N/A	7.24552	#N/A	#N/A	#N/A	#N/A	#N/A	#N/A	5.81933	9.69873	5.80022	#N/A
108	hexan-3-one	CCCC(=O)CC	Ketone-Dialkyl	#N/A	4.91212	#N/A	#N/A	#N/A	#N/A	#N/A	#N/A	#N/A	#N/A	#N/A	#N/A	#N/A	#N/A	#N/A	#N/A	#N/A	#N/A	#N/A	#N/A	#N/A	#N/A	#N/A	#N/A	#N/A	#N/A	#N/A	#N/A	#N/A	#N/A	#N/A	#N/A	#N/A	#N/A	#N/A
109	heptan-4-one	CCCC(=O)CCC	Ketone-Dialkyl	11.6385	8.30097	#N/A	#N/A	#N/A	#N/A	10.6686	#N/A	#N/A	#N/A	#N/A	#N/A	#N/A	#N/A	#N/A	#N/A	#N/A	11.2962	#N/A	#N/A	#N/A	#N/A	#N/A	#N/A	#N/A	#N/A	#N/A	#N/A	#N/A	#N/A	#N/A	#N/A	#N/A	#N/A	#N/A
110	4-methylpentan-2-one	CC(C)CC(C)=O	Ketone-Dialkyl	7.47373	4.84366	#N/A	#N/A	#N/A	#N/A	#N/A	#N/A	#N/A	#N/A	#N/A	#N/A	#N/A	#N/A	#N/A	#N/A	#N/A	#N/A	#N/A	#N/A	#N/A	#N/A	#N/A	#N/A	#N/A	#N/A	#N/A	#N/A	#N/A	#N/A	#N/A	#N/A	#N/A	#N/A	#N/A
111	undecan-6-one	CCCCCC(=O)CCCCC	Ketone-Dialkyl	#N/A	#N/A	#N/A	#N/A	#N/A	#N/A	#N/A	#N/A	#N/A	#N/A	#N/A	#N/A	#N/A	#N/A	#N/A	#N/A	#N/A	#N/A	#N/A	#N/A	#N/A	#N/A	#N/A	#N/A	#N/A	#N/A	#N/A	#N/A	#N/A	#N/A	#N/A	#N/A	#N/A	#N/A	#N/A
112	cyclopentanone	O=C1CCCC1	Ketone-Cycloalkyl	2.16795	-1.30648	#N/A	3.48013	#N/A	#N/A	0.456411	#N/A	#N/A	#N/A	#N/A	#N/A	6.50386	#N/A	#N/A	#N/A	#N/A	#N/A	#N/A	#N/A	#N/A	#N/A	#N/A	#N/A	1.25513	#N/A	#N/A	#N/A	#N/A	#N/A	#N/A	#N/A	#N/A	#N/A	#N/A
113	cyclohexanone	O=C1CCCCC1	Ketone-Cycloalkyl	4.62116	1.09539	#N/A	5.53398	#N/A	#N/A	#N/A	#N/A	#N/A	#N/A	#N/A	#N/A	7.81604	#N/A	#N/A	#N/A	5.9961	#N/A	#N/A	#N/A	#N/A	#N/A	#N/A	#N/A	#N/A	#N/A	#N/A	#N/A	#N/A	#N/A	#N/A	0.285352	#N/A	#N/A	#N/A
114	cycloheptanone	O=C1CCCCCC1	Ketone-Cycloalkyl	#N/A	5.45411	#N/A	#N/A	#N/A	#N/A	#N/A	#N/A	#N/A	#N/A	#N/A	#N/A	#N/A	#N/A	#N/A	#N/A	#N/A	#N/A	#N/A	#N/A	#N/A	#N/A	#N/A	#N/A	#N/A	#N/A	#N/A	#N/A	#N/A	#N/A	#N/A	#N/A	#N/A	#N/A	#N/A
115	cyclooctanone	O=C1CCCCCCC1	Ketone-Cycloalkyl	#N/A	9.13392	#N/A	#N/A	#N/A	#N/A	#N/A	#N/A	#N/A	#N/A	#N/A	#N/A	#N/A	#N/A	#N/A	#N/A	#N/A	#N/A	#N/A	#N/A	#N/A	#N/A	#N/A	#N/A	#N/A	#N/A	#N/A	#N/A	#N/A	#N/A	#N/A	#N/A	#N/A	#N/A	#N/A
116	phenol	Oc1ccccc1	Phenol	8.55771	-6.18437	#N/A	-1.71154	3.65129	1.82564	#N/A	#N/A	2.1109	#N/A	#N/A	#N/A	3.48013	1.42628	#N/A	#N/A	#N/A	#N/A	#N/A	#N/A	#N/A	#N/A	#N/A	#N/A	4.73526	#N/A	#N/A	#N/A	#N/A	#N/A	#N/A	-6.72056	1.31218	-4.64018	-14.9475
117	3-methylphenol	Cc1cccc(O)c1	Phenol-methyl substituted	11.2962	-1.65449	#N/A	#N/A	#N/A	5.07757	#N/A	#N/A	#N/A	#N/A	#N/A	#N/A	2.68141	#N/A	#N/A	#N/A	#N/A	#N/A	#N/A	#N/A	#N/A	#N/A	#N/A	#N/A	#N/A	#N/A	#N/A	#N/A	#N/A	#N/A	#N/A	-1.82553	5.36283	-4.75428	#N/A
118	4-methylphenol	Cc1ccc(O)cc1	Phenol-methyl substituted	11.2391	-1.07257	#N/A	1.25513	6.56091	6.04745	#N/A	#N/A	5.07757	#N/A	#N/A	#N/A	6.73206	4.56411	#N/A	#N/A	#N/A	#N/A	#N/A	#N/A	#N/A	#N/A	#N/A	#N/A	#N/A	#N/A	#N/A	#N/A	#N/A	#N/A	#N/A	-1.93964	#N/A	-0.798719	-10.4404
119	3,4-dimethylphenol	Cc1ccc(O)cc1C	Phenol-methyl substituted	12.7225	1.19808	#N/A	#N/A	#N/A	#N/A	#N/A	#N/A	#N/A	#N/A	#N/A	#N/A	#N/A	6.96027	#N/A	#N/A	#N/A	#N/A	#N/A	#N/A	#N/A	#N/A	#N/A	#N/A	#N/A	#N/A	#N/A	#N/A	#N/A	#N/A	#N/A	1.59186	#N/A	#N/A	#N/A
120	3,5-dimethylphenol	Cc1cc(C)cc(O)c1	Phenol-methyl substituted	13.4071	1.46052	#N/A	4.67821	#N/A	#N/A	#N/A	#N/A	#N/A	#N/A	#N/A	#N/A	#N/A	7.18847	#N/A	#N/A	#N/A	#N/A	#N/A	#N/A	#N/A	#N/A	#N/A	#N/A	#N/A	#N/A	#N/A	#N/A	#N/A	#N/A	#N/A	2.06539	#N/A	#N/A	#N/A
121	3-chlorophenol	Oc1cccc([Cl])c1	Phenol-Chloro substituted	14.2628	-0.439296	#N/A	2.79552	7.30258	5.81924	#N/A	#N/A	#N/A	#N/A	#N/A	#N/A	7.30258	5.70514	#N/A	#N/A	#N/A	#N/A	#N/A	#N/A	#N/A	#N/A	#N/A	#N/A	#N/A	#N/A	#N/A	#N/A	#N/A	#N/A	#N/A	-0.40494	#N/A	#N/A	#N/A
122	4-chlorophenol	Oc1ccc([Cl])cc1	Phenol-Chloro substituted	13.6923	-2.19648	#N/A	2.28205	#N/A	#N/A	#N/A	#N/A	#N/A	#N/A	#N/A	#N/A	7.58783	5.93334	#N/A	#N/A	#N/A	#N/A	#N/A	#N/A	#N/A	#N/A	#N/A	#N/A	#N/A	#N/A	#N/A	#N/A	#N/A	#N/A	#N/A	-0.52474	#N/A	#N/A	-11.6955
123	3,4-dichlorophenol	Oc1ccc([Cl])c([Cl])c1	Phenol-Chloro substituted	18.9981	0.342308	#N/A	#N/A	#N/A	#N/A	#N/A	#N/A	#N/A	#N/A	#N/A	#N/A	#N/A	#N/A	#N/A	#N/A	#N/A	#N/A	#N/A	#N/A	#N/A	#N/A	#N/A	#N/A	#N/A	#N/A	#N/A	#N/A	#N/A	#N/A	#N/A	#N/A	#N/A	#N/A	#N/A
124	3,5-dichlorophenol	Oc1cc([Cl])cc([Cl])c1	Phenol-Chloro substituted	20.6526	2.24782	#N/A	#N/A	#N/A	#N/A	#N/A	#N/A	#N/A	#N/A	#N/A	#N/A	#N/A	#N/A	#N/A	#N/A	#N/A	#N/A	#N/A	#N/A	#N/A	#N/A	#N/A	#N/A	#N/A	#N/A	#N/A	#N/A	#N/A	#N/A	#N/A	#N/A	#N/A	#N/A	#N/A
125	chloroethane	[Cl]CC	Alkane-Monochloro	8.15835	6.94886	#N/A	#N/A	#N/A	#N/A	#N/A	#N/A	#N/A	#N/A	#N/A	#N/A	#N/A	9.75578	#N/A	#N/A	#N/A	8.38655	#N/A	7.98719	7.81604	7.70194	#N/A	#N/A	#N/A	#N/A	7.70194	7.47373	7.53078	7.58783	7.54219	8.26109	#N/A	#N/A	#N/A
126	1-chloropropane	CCC[Cl]	Alkane-Monochloro	11.6385	11.1935	#N/A	14.0917	#N/A	13.7494	#N/A	#N/A	#N/A	#N/A	#N/A	#N/A	14.0917	#N/A	#N/A	14.0346	13.9719	#N/A	#N/A	#N/A	11.8667	#N/A	#N/A	#N/A	11.4103	#N/A	#N/A	#N/A	#N/A	#N/A	#N/A	12.7225	#N/A	#N/A	#N/A
127	1-chlorobutane	CCCC[Cl]	Alkane-Monochloro	15.0616	14.8448	17.6289	17.3436	#N/A	#N/A	16.4878	#N/A	#N/A	#N/A	#N/A	#N/A	17.8571	17.5148	17.1154	#N/A	#N/A	#N/A	#N/A	14.3199	#N/A	#N/A	#N/A	#N/A	14.8334	14.6622	#N/A	14.8904	14.8904	14.7763	#N/A	16.1456	#N/A	#N/A	#N/A
128	1,3-dichloropropane	[Cl]CCC[Cl]	Alkane-Dichloro	11.4103	9.79002	#N/A	13.8064	#N/A	#N/A	#N/A	#N/A	#N/A	#N/A	#N/A	#N/A	#N/A	#N/A	15.6321	#N/A	#N/A	#N/A	#N/A	#N/A	#N/A	#N/A	#N/A	#N/A	#N/A	#N/A	#N/A	#N/A	#N/A	#N/A	#N/A	10.6116	#N/A	#N/A	#N/A
129	1-chloropentane	CCCCC[Cl]	Alkane-Monochloro	17.743	18.1024	#N/A	#N/A	#N/A	#N/A	19.7398	#N/A	#N/A	#N/A	#N/A	23.4424	#N/A	#N/A	20.025	#N/A	#N/A	#N/A	#N/A	#N/A	#N/A	#N/A	#N/A	#N/A	#N/A	#N/A	#N/A	#N/A	#N/A	#N/A	#N/A	19.717	#N/A	#N/A	#N/A
130	1-chloroheptane	CCCCCCC[Cl]	Alkane-Monochloro	23.6763	25.2053	#N/A	#N/A	#N/A	#N/A	#N/A	#N/A	#N/A	#N/A	#N/A	#N/A	#N/A	#N/A	#N/A	#N/A	#N/A	#N/A	#N/A	#N/A	#N/A	#N/A	#N/A	#N/A	#N/A	#N/A	#N/A	#N/A	#N/A	#N/A	#N/A	#N/A	#N/A	#N/A	#N/A
131	naphthalene	c1ccc2ccccc2c1	Polycyclic aromatic	18.9696	19.4032	22.5923	21.8507	23.8475	22.9347	#N/A	22.0789	#N/A	#N/A	#N/A	24.3039	23.5052	22.8776	22.7635	#N/A	22.25	19.2834	19.6827	19.5686	19.6257	18.7699	19.7398	#N/A	19.5686	#N/A	18.827	18.7129	19.6257	18.5987	#N/A	20.2534	#N/A	19.6542	#N/A
132	phenanthrene	c1ccc2c(c1)ccc3ccccc23	Polycyclic aromatic	25.6161	27.5672	#N/A	29.952	#N/A	28.868	28.0693	28.1263	#N/A	30.4654	30.7507	32.0629	#N/A	#N/A	31.1501	31.2071	31.5494	25.3308	26.0154	25.6731	25.3822	25.8443	#N/A	26.3121	26.9282	#N/A	24.3609	24.3609	24.0186	23.9616	24.7032	25.97	#N/A	26.3235	#N/A
133	﻿anthracene	c1ccc2cc3ccccc3cc2c1	Polycyclic aromatic	25.3879	25.8899	28.1834	29.3244	31.8917	30.6366	27.1565	26.4148	30.5225	28.7539	29.3244	32.4052	#N/A	30.9218	29.6097	30.1802	31.3783	24.0757	26.1866	24.7032	25.0456	25.2966	25.6902	25.9584	25.7872	26.7229	24.7032	24.1327	23.5622	23.334	24.2468	25.2283	30.0661	25.6275	#N/A
134	pyrene	c1cc2ccc3cccc4ccc(c1)c2c34	Polycyclic aromatic	28.5257	30.4255	31.8347	32.9757	#N/A	35.0295	30.7507	29.7238	34.1167	32.4622	33.261	36.1135	35.1436	#N/A	33.2039	34.2308	35.0866	26.8769	28.3545	27.9552	28.4002	28.9707	29.4157	29.1989	29.952	#N/A	27.9552	27.4988	26.7571	26.643	27.6129	28.3034	33.8885	28.9365	#N/A
135	pyridine	c1ccncc1	Pyridine	3.70834	-2.38475	#N/A	1.8827	#N/A	7.35963	#N/A	#N/A	2.45321	#N/A	#N/A	#N/A	4.1077	#N/A	3.02372	2.85257	#N/A	#N/A	4.2218	3.13783	2.90962	#N/A	#N/A	#N/A	#N/A	#N/A	2.39616	3.93654	4.1077	2.96667	#N/A	-2.11082	1.82564	-2.33911	#N/A
136	acetonitrile	CC#N	Nitrile	-1.93975	-6.33841	-1.08398	-3.59424	3.42308	2.28205	-4.16475	#N/A	#N/A	3.53719	#N/A	1.71154	2.16795	-0.627565	-0.228205	2.39616	1.71725	0.627565	0.285257	#N/A	-1.42628	#N/A	#N/A	#N/A	-3.08077	#N/A	#N/A	#N/A	#N/A	#N/A	#N/A	-6.1615	#N/A	-8.04424	#N/A
137	proprionitrile	CCC#N	Nitrile	0.912822	-4.21039	#N/A	-0.285257	#N/A	#N/A	#N/A	#N/A	#N/A	#N/A	#N/A	#N/A	4.73526	2.51026	#N/A	#N/A	#N/A	4.50706	#N/A	#N/A	0.684616	#N/A	#N/A	#N/A	-0.741668	#N/A	#N/A	#N/A	#N/A	#N/A	#N/A	-3.3945	#N/A	#N/A	#N/A
138	1-cyanopropane	CCCC#N	Nitrile	3.42308	-0.696027	#N/A	#N/A	#N/A	#N/A	#N/A	#N/A	#N/A	#N/A	#N/A	#N/A	#N/A	#N/A	#N/A	#N/A	#N/A	6.56091	#N/A	#N/A	4.1077	3.48013	2.84686	#N/A	2.56731	#N/A	3.9936	3.87949	3.82244	4.27885	#N/A	0.445072	#N/A	#N/A	#N/A
139	1-cyanobutane	CCCCC#N	Nitrile	5.36283	3.01231	#N/A	#N/A	#N/A	#N/A	#N/A	#N/A	#N/A	#N/A	#N/A	#N/A	#N/A	#N/A	#N/A	#N/A	#N/A	#N/A	#N/A	#N/A	#N/A	#N/A	#N/A	#N/A	5.81924	#N/A	#N/A	#N/A	#N/A	#N/A	#N/A	3.87958	#N/A	#N/A	#N/A
140	1-cyanopentane	CCCCCC#N	Nitrile	9.47053	#N/A	#N/A	#N/A	#N/A	#N/A	#N/A	#N/A	#N/A	#N/A	#N/A	#N/A	#N/A	#N/A	#N/A	#N/A	#N/A	#N/A	#N/A	#N/A	#N/A	#N/A	#N/A	#N/A	#N/A	#N/A	#N/A	#N/A	#N/A	#N/A	#N/A	#N/A	#N/A	#N/A	#N/A
141	biphenyl	c1ccc(cc1)c1ccccc1	Benzene-Biphenyl	22.8776	23.1857	24.8173	27.4417	28.1834	26.643	25.9013	26.7	#N/A	#N/A	#N/A	#N/A	27.9552	27.6129	#N/A	#N/A	#N/A	21.8507	23.277	23.3911	#N/A	23.7334	23.7334	23.8475	23.9616	#N/A	22.7064	23.1058	22.4782	22.5923	22.9917	24.5323	#N/A	#N/A	#N/A
142	ammonia	N	Amine-NH3	-7.98719	-16.3794	#N/A	-13.6923	#N/A	-8.1013	#N/A	#N/A	#N/A	#N/A	#N/A	#N/A	#N/A	-12.4943	-9.75578	-10.0981	#N/A	-5.30578	-6.73206	-8.15835	-8.15835	#N/A	#N/A	#N/A	#N/A	#N/A	-8.27245	#N/A	-7.58783	#N/A	#N/A	#N/A	#N/A	#N/A	#N/A
143	t-butyl chloride	CC(C)(C)[Cl]	Alkane-Monochloro	14.7478	17.5319	18.7129	19.8539	#N/A	#N/A	#N/A	#N/A	#N/A	#N/A	#N/A	18.827	19.5116	19.4545	#N/A	#N/A	19.774	#N/A	#N/A	#N/A	16.9443	#N/A	#N/A	#N/A	#N/A	#N/A	16.2596	#N/A	#N/A	16.8872	#N/A	18.8841	#N/A	#N/A	#N/A
144	tetrahydropyran	C1CCOCC1	Ether cyclic	4.53558	4.03353	#N/A	#N/A	#N/A	11.2391	#N/A	#N/A	#N/A	#N/A	#N/A	#N/A	#N/A	#N/A	#N/A	#N/A	#N/A	#N/A	#N/A	#N/A	#N/A	#N/A	#N/A	#N/A	5.19168	#N/A	#N/A	#N/A	#N/A	#N/A	#N/A	#N/A	#N/A	5.24873	#N/A
145	tetrahydrofuran	C1CCOC1	Ether cyclic	2.62436	0.43359	#N/A	3.25193	#N/A	7.41668	1.31218	#N/A	#N/A	#N/A	#N/A	3.30898	4.3359	2.33911	2.62436	#N/A	#N/A	3.93654	#N/A	1.93975	#N/A	#N/A	#N/A	#N/A	1.71154	#N/A	1.8827	#N/A	#N/A	#N/A	#N/A	0.79879	#N/A	#N/A	#N/A
146	tetrahydrothiophene	C1CCSC1	Sulfide-cycloalkyl	9.18527	7.9929	#N/A	#N/A	#N/A	#N/A	#N/A	#N/A	#N/A	#N/A	#N/A	#N/A	#N/A	#N/A	#N/A	#N/A	#N/A	#N/A	#N/A	#N/A	#N/A	#N/A	#N/A	#N/A	#N/A	#N/A	#N/A	#N/A	#N/A	#N/A	#N/A	#N/A	#N/A	#N/A	#N/A
147	pentamethylene sulfide	S1CCCCC1	Sulfide-cycloalkyl	#N/A	#N/A	#N/A	#N/A	#N/A	#N/A	#N/A	#N/A	#N/A	#N/A	#N/A	#N/A	#N/A	#N/A	#N/A	#N/A	#N/A	#N/A	#N/A	#N/A	#N/A	#N/A	#N/A	#N/A	#N/A	#N/A	#N/A	#N/A	#N/A	#N/A	#N/A	#N/A	#N/A	#N/A	#N/A
148	4-ethylphenol	CCc1ccc(O)cc1	Phenol-alkyl substituted	14.7193	1.35212	#N/A	4.90642	9.47053	8.38655	#N/A	#N/A	#N/A	#N/A	#N/A	#N/A	9.52758	7.41668	#N/A	#N/A	#N/A	#N/A	#N/A	#N/A	#N/A	#N/A	#N/A	#N/A	#N/A	#N/A	#N/A	#N/A	#N/A	#N/A	#N/A	1.65461	#N/A	#N/A	-7.58783
149	d-valerolactam	O=C1CCCCN1	Amide	-2.65289	-15.9059	#N/A	#N/A	#N/A	#N/A	#N/A	#N/A	#N/A	#N/A	#N/A	#N/A	#N/A	#N/A	#N/A	#N/A	#N/A	#N/A	#N/A	#N/A	#N/A	#N/A	#N/A	#N/A	#N/A	#N/A	#N/A	#N/A	#N/A	#N/A	#N/A	#N/A	#N/A	#N/A	#N/A
150	n-methyl-d-valerolactam	CN1C(=O)CCCC1	Amide	-1.31218	-5.35712	#N/A	#N/A	#N/A	#N/A	#N/A	#N/A	#N/A	#N/A	#N/A	#N/A	#N/A	#N/A	#N/A	#N/A	#N/A	#N/A	#N/A	#N/A	#N/A	#N/A	#N/A	#N/A	#N/A	#N/A	#N/A	#N/A	#N/A	#N/A	#N/A	#N/A	#N/A	#N/A	#N/A
151	n,n-dimethylacetamide	CN(C)C(C)=O	Amide	-4.39296	-13.6752	#N/A	#N/A	#N/A	-0.718847	#N/A	#N/A	#N/A	#N/A	#N/A	#N/A	-4.14193	#N/A	#N/A	#N/A	#N/A	#N/A	#N/A	#N/A	#N/A	#N/A	#N/A	#N/A	#N/A	#N/A	#N/A	#N/A	#N/A	#N/A	#N/A	#N/A	#N/A	#N/A	#N/A
152	n-formylpiperidine	O=CN1CCCCC1	Amide	#N/A	#N/A	#N/A	#N/A	#N/A	#N/A	#N/A	#N/A	#N/A	#N/A	#N/A	#N/A	#N/A	#N/A	#N/A	#N/A	#N/A	#N/A	#N/A	#N/A	#N/A	#N/A	#N/A	#N/A	#N/A	#N/A	#N/A	#N/A	#N/A	#N/A	#N/A	#N/A	#N/A	#N/A	#N/A
153	n-methylpiperidine	CN1CCCCC1	Amine-Tertiary Cyclic	7.35963	2.73847	#N/A	#N/A	#N/A	7.75899	#N/A	#N/A	#N/A	#N/A	#N/A	#N/A	#N/A	#N/A	#N/A	#N/A	#N/A	#N/A	#N/A	#N/A	#N/A	#N/A	#N/A	#N/A	#N/A	#N/A	#N/A	#N/A	#N/A	#N/A	#N/A	#N/A	#N/A	#N/A	#N/A
154	2-methylpiperidine	CC1CCCCN1	Amine-Secondary Cyclic	#N/A	0.456411	#N/A	#N/A	#N/A	#N/A	#N/A	#N/A	#N/A	#N/A	#N/A	#N/A	#N/A	#N/A	#N/A	#N/A	#N/A	#N/A	#N/A	#N/A	#N/A	#N/A	#N/A	#N/A	#N/A	#N/A	#N/A	#N/A	#N/A	#N/A	#N/A	#N/A	#N/A	#N/A	#N/A
155	3-methylpiperidine	CC1CCCNC1	Amine-Secondary Cyclic	#N/A	0.416475	#N/A	#N/A	#N/A	#N/A	#N/A	#N/A	#N/A	#N/A	#N/A	#N/A	#N/A	#N/A	#N/A	#N/A	#N/A	#N/A	#N/A	#N/A	#N/A	#N/A	#N/A	#N/A	#N/A	#N/A	#N/A	#N/A	#N/A	#N/A	#N/A	#N/A	#N/A	#N/A	#N/A
156	4-methylpiperidine	CC1CCNCC1	Amine-Secondary Cyclic	#N/A	0.450706	#N/A	#N/A	#N/A	#N/A	#N/A	#N/A	#N/A	#N/A	#N/A	#N/A	#N/A	#N/A	#N/A	#N/A	#N/A	#N/A	#N/A	#N/A	#N/A	#N/A	#N/A	#N/A	#N/A	#N/A	#N/A	#N/A	#N/A	#N/A	#N/A	#N/A	#N/A	#N/A	#N/A
157	pyrrolidine	C1CCNC1	Amine-Secondary Cyclic	2.65289	#N/A	#N/A	#N/A	#N/A	#N/A	#N/A	#N/A	#N/A	#N/A	#N/A	#N/A	#N/A	#N/A	#N/A	#N/A	#N/A	#N/A	#N/A	#N/A	#N/A	#N/A	#N/A	#N/A	#N/A	#N/A	#N/A	#N/A	#N/A	#N/A	#N/A	#N/A	#N/A	#N/A	#N/A
158	n-methylpyrrolidine	CN1CCCC1	Amine-Tertiary Cyclic	5.24873	#N/A	#N/A	#N/A	#N/A	#N/A	#N/A	#N/A	#N/A	#N/A	#N/A	#N/A	#N/A	#N/A	#N/A	#N/A	#N/A	#N/A	#N/A	#N/A	#N/A	#N/A	#N/A	#N/A	#N/A	#N/A	#N/A	#N/A	#N/A	#N/A	#N/A	#N/A	#N/A	#N/A	#N/A
159	2-pyrrolidinone	O=C1CCCN1	Amide	-4.84937	#N/A	#N/A	#N/A	#N/A	#N/A	#N/A	#N/A	#N/A	#N/A	#N/A	#N/A	#N/A	#N/A	#N/A	#N/A	#N/A	#N/A	#N/A	#N/A	#N/A	#N/A	#N/A	#N/A	#N/A	#N/A	#N/A	#N/A	#N/A	#N/A	#N/A	#N/A	#N/A	#N/A	#N/A
160	n-methyl-2-pyrrolidinone	CN1CCCC1=O	Amide	-4.76379	-10.8854	#N/A	#N/A	#N/A	#N/A	#N/A	#N/A	#N/A	#N/A	#N/A	#N/A	#N/A	#N/A	#N/A	#N/A	#N/A	#N/A	#N/A	#N/A	#N/A	#N/A	#N/A	#N/A	#N/A	#N/A	#N/A	#N/A	#N/A	#N/A	#N/A	#N/A	#N/A	#N/A	#N/A
161	n-acetylpiperidine	O=C(C)N1CCCCC1	Amide	#N/A	#N/A	#N/A	#N/A	#N/A	#N/A	#N/A	#N/A	#N/A	#N/A	#N/A	#N/A	#N/A	#N/A	#N/A	#N/A	#N/A	#N/A	#N/A	#N/A	#N/A	#N/A	#N/A	#N/A	#N/A	#N/A	#N/A	#N/A	#N/A	#N/A	#N/A	#N/A	#N/A	#N/A	#N/A
162	dimethylsulfide	CSC	Sulfide-Dialkyl	10.0981	4.8893	#N/A	#N/A	#N/A	#N/A	#N/A	#N/A	#N/A	#N/A	#N/A	#N/A	#N/A	#N/A	#N/A	#N/A	#N/A	#N/A	#N/A	#N/A	#N/A	#N/A	#N/A	#N/A	#N/A	#N/A	#N/A	#N/A	#N/A	#N/A	#N/A	5.67667	#N/A	#N/A	#N/A
163	diethylsulfide	CCSCC	Sulfide-Dialkyl	11.125	11.1307	#N/A	#N/A	#N/A	20.6526	#N/A	#N/A	#N/A	#N/A	#N/A	#N/A	#N/A	#N/A	#N/A	#N/A	#N/A	#N/A	#N/A	#N/A	#N/A	#N/A	#N/A	#N/A	#N/A	#N/A	#N/A	#N/A	#N/A	#N/A	#N/A	#N/A	#N/A	#N/A	#N/A
164	dipropylsulfide	CCCSCCC	Sulfide-Dialkyl	16.8872	17.5148	#N/A	#N/A	#N/A	#N/A	#N/A	#N/A	#N/A	#N/A	#N/A	#N/A	#N/A	#N/A	#N/A	#N/A	#N/A	#N/A	#N/A	#N/A	#N/A	#N/A	#N/A	#N/A	#N/A	#N/A	#N/A	#N/A	#N/A	#N/A	#N/A	#N/A	#N/A	#N/A	#N/A
165	diisopropylsulfide	CC(C)SC(C)C	Sulfide-Dialkyl	14.3769	15.1471	#N/A	#N/A	#N/A	#N/A	#N/A	#N/A	#N/A	#N/A	#N/A	#N/A	#N/A	#N/A	#N/A	#N/A	#N/A	#N/A	#N/A	#N/A	#N/A	#N/A	#N/A	#N/A	#N/A	#N/A	#N/A	#N/A	#N/A	#N/A	#N/A	#N/A	#N/A	#N/A	#N/A
166	methylethylsulfide	CSCC	Sulfide-Dialkyl	8.78591	7.25693	#N/A	#N/A	#N/A	#N/A	#N/A	#N/A	#N/A	#N/A	#N/A	#N/A	#N/A	#N/A	#N/A	#N/A	#N/A	#N/A	#N/A	#N/A	#N/A	#N/A	#N/A	#N/A	#N/A	#N/A	#N/A	#N/A	#N/A	#N/A	#N/A	#N/A	#N/A	#N/A	#N/A
167	ethene	C=C	Alkene-ethene	6.44681	7.01161	#N/A	8.61476	#N/A	#N/A	#N/A	#N/A	#N/A	#N/A	#N/A	8.78591	7.41668	7.93014	8.55771	#N/A	7.65059	7.70194	7.70194	7.53078	7.30258	7.35963	7.17706	7.14283	6.96027	#N/A	7.24552	7.18847	7.30258	7.41668	#N/A	8.04996	#N/A	#N/A	#N/A
168	propene	CC=C	Alkene-methyl substituted	10.0981	10.931	#N/A	13.2359	#N/A	#N/A	#N/A	#N/A	#N/A	#N/A	#N/A	#N/A	#N/A	#N/A	#N/A	11.9808	#N/A	10.9539	#N/A	11.1821	11.4103	11.068	#N/A	#N/A	#N/A	#N/A	11.068	11.068	10.9539	11.1821	11.028	12.8708	#N/A	#N/A	#N/A
169	1-butene	C=CCC	Alkene-monoalkyl substituted	13.6923	14.4853	#N/A	16.2026	#N/A	#N/A	#N/A	#N/A	#N/A	#N/A	#N/A	#N/A	#N/A	#N/A	#N/A	#N/A	#N/A	#N/A	#N/A	14.1487	14.1487	14.1487	#N/A	#N/A	#N/A	#N/A	14.0346	14.0917	14.0346	14.2628	14.1031	16.1798	#N/A	#N/A	#N/A
170	pent-1-ene	CCCC=C	Alkene-monoalkyl substituted	15.9744	18.6957	#N/A	#N/A	#N/A	#N/A	#N/A	#N/A	#N/A	#N/A	#N/A	#N/A	18.9981	19.6257	#N/A	19.0552	18.5873	#N/A	#N/A	#N/A	18.0853	#N/A	#N/A	#N/A	18.0282	#N/A	#N/A	#N/A	#N/A	#N/A	#N/A	#N/A	#N/A	#N/A	#N/A
171	hex-1-ene	CCCCC=C	Alkene-monoalkyl substituted	19.3689	21.2916	#N/A	22.5923	#N/A	#N/A	#N/A	#N/A	#N/A	20.4814	20.5955	#N/A	#N/A	#N/A	#N/A	#N/A	#N/A	#N/A	#N/A	#N/A	20.0821	20.4244	#N/A	#N/A	20.3673	#N/A	#N/A	#N/A	#N/A	#N/A	#N/A	#N/A	#N/A	#N/A	#N/A
172	hept-1-ene	CCCCCC=C	Alkene-monoalkyl substituted	22.7635	24.4351	#N/A	#N/A	#N/A	#N/A	#N/A	#N/A	#N/A	22.8205	23.334	#N/A	#N/A	#N/A	#N/A	#N/A	#N/A	#N/A	#N/A	#N/A	#N/A	23.3911	#N/A	#N/A	#N/A	#N/A	#N/A	#N/A	#N/A	#N/A	#N/A	#N/A	#N/A	#N/A	#N/A
173	oct-1-ene	CCCCCCC=C	Alkene-monoalkyl substituted	26.0725	28.4002	#N/A	#N/A	#N/A	#N/A	#N/A	#N/A	#N/A	26.9853	26.9282	#N/A	#N/A	#N/A	#N/A	#N/A	#N/A	#N/A	#N/A	#N/A	#N/A	#N/A	#N/A	#N/A	27.1565	#N/A	#N/A	#N/A	#N/A	#N/A	#N/A	#N/A	#N/A	#N/A	#N/A
174	non-1-ene	CCCCCCCC=C	Alkene-monoalkyl substituted	29.3815	31.8518	#N/A	#N/A	#N/A	#N/A	#N/A	#N/A	#N/A	#N/A	#N/A	#N/A	#N/A	#N/A	#N/A	#N/A	#N/A	#N/A	#N/A	#N/A	#N/A	#N/A	#N/A	#N/A	30.4654	#N/A	#N/A	#N/A	#N/A	#N/A	#N/A	#N/A	#N/A	#N/A	#N/A
175	dec-1-ene	CCCCCCCCC=C	Alkene-monoalkyl substituted	32.5193	35.2178	#N/A	#N/A	#N/A	#N/A	#N/A	#N/A	#N/A	#N/A	#N/A	#N/A	#N/A	#N/A	#N/A	#N/A	#N/A	#N/A	#N/A	#N/A	#N/A	#N/A	#N/A	#N/A	#N/A	#N/A	#N/A	#N/A	#N/A	#N/A	#N/A	#N/A	#N/A	#N/A	#N/A
176	undec-1-ene	CCCCCCCCCC=C	Alkene-monoalkyl substituted	#N/A	38.6409	#N/A	#N/A	#N/A	#N/A	#N/A	#N/A	#N/A	#N/A	#N/A	#N/A	#N/A	#N/A	#N/A	#N/A	#N/A	#N/A	#N/A	#N/A	#N/A	#N/A	#N/A	#N/A	#N/A	#N/A	#N/A	#N/A	#N/A	#N/A	#N/A	#N/A	#N/A	#N/A	#N/A
177	dodec-1-ene	CCCCCCCCCCC=C	Alkene-monoalkyl substituted	#N/A	42.1324	#N/A	#N/A	#N/A	#N/A	#N/A	#N/A	#N/A	#N/A	#N/A	#N/A	#N/A	#N/A	#N/A	#N/A	#N/A	#N/A	#N/A	#N/A	#N/A	#N/A	#N/A	#N/A	#N/A	#N/A	#N/A	#N/A	#N/A	#N/A	#N/A	#N/A	#N/A	#N/A	#N/A
178	n-methylformamide	CNC=O	Amide	-5.53398	-21.1489	#N/A	#N/A	#N/A	#N/A	#N/A	#N/A	#N/A	#N/A	#N/A	#N/A	#N/A	#N/A	-6.73206	#N/A	#N/A	#N/A	#N/A	#N/A	#N/A	#N/A	#N/A	#N/A	#N/A	#N/A	#N/A	#N/A	#N/A	#N/A	#N/A	#N/A	#N/A	#N/A	#N/A
179	n,n-dimethylformamide	CN(C)C=O	Amide	-5.76219	-14.588	#N/A	#N/A	#N/A	#N/A	#N/A	#N/A	#N/A	#N/A	#N/A	-7.64488	#N/A	#N/A	-5.81924	-5.87629	#N/A	#N/A	#N/A	#N/A	#N/A	#N/A	#N/A	#N/A	-7.70194	#N/A	#N/A	#N/A	#N/A	#N/A	#N/A	#N/A	#N/A	#N/A	#N/A
180	n,n-diethylformamide	CCN(CC)C=O	Amide	#N/A	#N/A	#N/A	#N/A	#N/A	#N/A	#N/A	#N/A	#N/A	#N/A	#N/A	#N/A	#N/A	#N/A	#N/A	#N/A	#N/A	#N/A	#N/A	#N/A	#N/A	#N/A	#N/A	#N/A	#N/A	#N/A	#N/A	#N/A	#N/A	#N/A	#N/A	#N/A	#N/A	#N/A	#N/A
181	n,n-dibutylformamide	CCCCN(C=O)CCCC	Amide	#N/A	7.29117	#N/A	#N/A	#N/A	#N/A	#N/A	#N/A	#N/A	#N/A	#N/A	#N/A	#N/A	#N/A	#N/A	#N/A	#N/A	#N/A	#N/A	#N/A	#N/A	#N/A	#N/A	#N/A	#N/A	#N/A	#N/A	#N/A	#N/A	#N/A	#N/A	#N/A	#N/A	#N/A	#N/A
182	n-methylacetamide	CNC(C)=O	Amide	-5.99039	-22.2843	#N/A	#N/A	#N/A	#N/A	#N/A	#N/A	#N/A	#N/A	#N/A	#N/A	#N/A	#N/A	#N/A	#N/A	#N/A	#N/A	#N/A	#N/A	#N/A	#N/A	#N/A	#N/A	#N/A	#N/A	#N/A	#N/A	#N/A	#N/A	#N/A	#N/A	#N/A	#N/A	#N/A
183	n-ethylacetamide	CCNC(C)=O	Amide	#N/A	-16.408	#N/A	#N/A	#N/A	#N/A	#N/A	#N/A	#N/A	#N/A	#N/A	#N/A	#N/A	#N/A	#N/A	#N/A	#N/A	#N/A	#N/A	#N/A	#N/A	#N/A	#N/A	#N/A	#N/A	#N/A	#N/A	#N/A	#N/A	#N/A	#N/A	#N/A	#N/A	#N/A	#N/A
184	n-butylacetamide	CCCCNC(C)=O	Amide	2.90962	-11.3418	#N/A	#N/A	#N/A	#N/A	#N/A	#N/A	#N/A	#N/A	#N/A	#N/A	#N/A	#N/A	#N/A	#N/A	#N/A	#N/A	#N/A	#N/A	#N/A	#N/A	#N/A	#N/A	#N/A	#N/A	#N/A	#N/A	#N/A	#N/A	#N/A	#N/A	#N/A	#N/A	#N/A
185	n,n-diethylacetamide	CCN(CC)C(C)=O	Amide	1.93975	#N/A	#N/A	#N/A	#N/A	#N/A	#N/A	#N/A	#N/A	#N/A	#N/A	#N/A	#N/A	#N/A	#N/A	#N/A	#N/A	#N/A	#N/A	#N/A	#N/A	#N/A	#N/A	#N/A	#N/A	#N/A	#N/A	#N/A	#N/A	#N/A	#N/A	#N/A	#N/A	#N/A	#N/A
186	methylethylether	CCOC	Ether-Dialkyl	#N/A	0.296667	#N/A	#N/A	#N/A	#N/A	#N/A	#N/A	#N/A	#N/A	#N/A	#N/A	#N/A	#N/A	#N/A	#N/A	#N/A	#N/A	#N/A	#N/A	#N/A	#N/A	#N/A	#N/A	#N/A	#N/A	#N/A	#N/A	#N/A	#N/A	#N/A	#N/A	#N/A	#N/A	#N/A
187	methylcyclohexylether	COC1CCCCC1	Ether-Dialkyl	#N/A	8.16405	#N/A	#N/A	#N/A	#N/A	#N/A	#N/A	#N/A	#N/A	#N/A	#N/A	#N/A	#N/A	#N/A	#N/A	#N/A	#N/A	#N/A	#N/A	#N/A	#N/A	#N/A	#N/A	#N/A	#N/A	#N/A	#N/A	#N/A	#N/A	#N/A	#N/A	#N/A	#N/A	#N/A
188	undecan-1-ol	CCCCCCCCCCCO	Alcohol-Primary	26.9282	20.6982	#N/A	#N/A	#N/A	#N/A	#N/A	#N/A	#N/A	#N/A	#N/A	#N/A	#N/A	#N/A	#N/A	#N/A	#N/A	#N/A	#N/A	#N/A	#N/A	#N/A	#N/A	#N/A	#N/A	28.6968	#N/A	#N/A	#N/A	#N/A	#N/A	#N/A	#N/A	#N/A	#N/A
189	dodecan-1-ol	CCCCCCCCCCCCO	Alcohol-Primary	29.2674	23.8475	#N/A	#N/A	#N/A	#N/A	#N/A	#N/A	#N/A	#N/A	#N/A	#N/A	#N/A	#N/A	#N/A	#N/A	#N/A	#N/A	#N/A	#N/A	#N/A	#N/A	#N/A	#N/A	#N/A	#N/A	#N/A	#N/A	#N/A	#N/A	#N/A	24.8175	#N/A	#N/A	#N/A
190	tridecan-1-ol	CCCCCCCCCCCCCO	Alcohol-Primary	33.2039	27.1393	#N/A	#N/A	#N/A	#N/A	#N/A	#N/A	#N/A	#N/A	#N/A	#N/A	#N/A	#N/A	#N/A	#N/A	#N/A	#N/A	#N/A	#N/A	#N/A	#N/A	#N/A	#N/A	#N/A	#N/A	#N/A	#N/A	#N/A	#N/A	#N/A	#N/A	#N/A	#N/A	#N/A
191	tetradecan-1-ol	CCCCCCCCCCCCCCO	Alcohol-Primary	36.2847	30.6708	#N/A	#N/A	#N/A	#N/A	#N/A	#N/A	#N/A	#N/A	#N/A	#N/A	#N/A	#N/A	#N/A	#N/A	#N/A	#N/A	#N/A	#N/A	#N/A	#N/A	38.1103	#N/A	#N/A	37.768	38.7379	#N/A	#N/A	#N/A	#N/A	#N/A	#N/A	#N/A	#N/A
192	pentadecan-1-ol	CCCCCCCCCCCCCCCO	Alcohol-Primary	38.7379	34.2651	#N/A	#N/A	#N/A	#N/A	39.5366	#N/A	#N/A	#N/A	#N/A	#N/A	#N/A	#N/A	#N/A	#N/A	#N/A	#N/A	#N/A	#N/A	#N/A	#N/A	#N/A	#N/A	#N/A	#N/A	#N/A	#N/A	#N/A	#N/A	#N/A	#N/A	#N/A	#N/A	#N/A
193	hexadecan-1-ol	CCCCCCCCCCCCCCCCO	Alcohol-Primary	41.7616	37.8479	45.0135	#N/A	#N/A	#N/A	43.4161	#N/A	#N/A	#N/A	#N/A	#N/A	#N/A	#N/A	#N/A	#N/A	#N/A	#N/A	#N/A	#N/A	#N/A	#N/A	45.1847	#N/A	44.9565	44.7283	45.8123	#N/A	#N/A	#N/A	#N/A	#N/A	#N/A	#N/A	#N/A
194	heptadecan-1-ol	CCCCCCCCCCCCCCCCCO	Alcohol-Primary	#N/A	41.4421	#N/A	#N/A	#N/A	#N/A	#N/A	#N/A	#N/A	#N/A	#N/A	#N/A	#N/A	#N/A	#N/A	#N/A	#N/A	#N/A	#N/A	#N/A	#N/A	#N/A	#N/A	#N/A	#N/A	#N/A	#N/A	#N/A	#N/A	#N/A	#N/A	#N/A	#N/A	#N/A	#N/A
195	octadecan-1-ol	CCCCCCCCCCCCCCCCCCO	Alcohol-Primary	#N/A	44.9679	52.4873	#N/A	#N/A	#N/A	50.4905	#N/A	#N/A	#N/A	#N/A	#N/A	#N/A	#N/A	#N/A	#N/A	#N/A	#N/A	#N/A	#N/A	#N/A	#N/A	52.2591	#N/A	52.202	52.0309	52.0309	#N/A	#N/A	#N/A	#N/A	#N/A	#N/A	#N/A	#N/A
196	nonadecan-1-ol	CCCCCCCCCCCCCCCCCCCO	Alcohol-Primary	#N/A	48.5108	#N/A	#N/A	#N/A	#N/A	#N/A	#N/A	#N/A	#N/A	#N/A	#N/A	#N/A	#N/A	#N/A	#N/A	#N/A	#N/A	#N/A	#N/A	#N/A	#N/A	#N/A	#N/A	#N/A	#N/A	#N/A	#N/A	#N/A	#N/A	#N/A	#N/A	#N/A	#N/A	#N/A
197	eicosan-1-ol	CCCCCCCCCCCCCCCCCCCCO	Alcohol-Primary	#N/A	52.0708	#N/A	#N/A	#N/A	#N/A	#N/A	#N/A	#N/A	#N/A	#N/A	#N/A	#N/A	#N/A	#N/A	#N/A	#N/A	#N/A	#N/A	#N/A	#N/A	#N/A	60.1321	#N/A	60.018	59.7328	59.0482	#N/A	#N/A	#N/A	#N/A	#N/A	#N/A	#N/A	#N/A
198	adamantan-1-ol	OC12CC3CC(C1)CC(C2)C3	Alcohol-Tertiary	12.209	2.76129	#N/A	#N/A	#N/A	#N/A	#N/A	#N/A	#N/A	#N/A	#N/A	#N/A	#N/A	#N/A	#N/A	#N/A	#N/A	#N/A	#N/A	#N/A	#N/A	#N/A	#N/A	#N/A	#N/A	#N/A	#N/A	#N/A	#N/A	#N/A	#N/A	#N/A	#N/A	#N/A	#N/A
199	propan-2-ol	CC(C)O	Alcohol-Secondary	0.285257	-9.79002	#N/A	-7.75899	#N/A	-1.9968	#N/A	#N/A	-5.30578	#N/A	-1.36923	-0.228205	#N/A	#N/A	#N/A	-0.855771	#N/A	#N/A	2.16795	1.08398	1.14103	1.02692	#N/A	#N/A	-0.570514	-1.08398	0.969873	#N/A	#N/A	1.14103	#N/A	-8.32945	#N/A	-9.92694	#N/A
200	butan-2-ol	CCC(C)O	Alcohol-Secondary	3.70834	-6.0018	#N/A	-3.08077	#N/A	1.71154	#N/A	#N/A	#N/A	#N/A	#N/A	#N/A	#N/A	-1.54039	#N/A	2.33911	#N/A	#N/A	#N/A	#N/A	3.65129	#N/A	#N/A	#N/A	2.33911	2.8868	#N/A	3.9936	#N/A	4.39296	#N/A	-4.46705	#N/A	#N/A	#N/A
201	pentan-2-ol	CCCC(C)O	Alcohol-Secondary	7.13142	-2.16795	#N/A	1.31218	#N/A	#N/A	#N/A	#N/A	#N/A	#N/A	#N/A	#N/A	4.45001	#N/A	#N/A	#N/A	#N/A	#N/A	#N/A	#N/A	#N/A	#N/A	#N/A	#N/A	#N/A	#N/A	#N/A	#N/A	#N/A	#N/A	#N/A	#N/A	#N/A	#N/A	#N/A
202	hexan-2-ol	CCCCC(C)O	Alcohol-Secondary	10.041	#N/A	#N/A	#N/A	#N/A	#N/A	#N/A	#N/A	#N/A	#N/A	#N/A	#N/A	#N/A	#N/A	#N/A	#N/A	#N/A	#N/A	#N/A	#N/A	#N/A	#N/A	#N/A	#N/A	#N/A	#N/A	#N/A	#N/A	#N/A	#N/A	#N/A	#N/A	#N/A	#N/A	#N/A
203	heptan-2-ol	CCCCCC(C)O	Alcohol-Secondary	13.1789	#N/A	#N/A	#N/A	#N/A	#N/A	#N/A	#N/A	#N/A	#N/A	#N/A	#N/A	#N/A	#N/A	#N/A	#N/A	#N/A	#N/A	#N/A	#N/A	#N/A	#N/A	#N/A	#N/A	#N/A	#N/A	#N/A	#N/A	#N/A	#N/A	#N/A	#N/A	#N/A	#N/A	#N/A
204	octan-2-ol	CCCCCCC(C)O	Alcohol-Secondary	16.5449	#N/A	#N/A	#N/A	#N/A	#N/A	#N/A	#N/A	#N/A	#N/A	#N/A	#N/A	#N/A	#N/A	#N/A	#N/A	#N/A	#N/A	#N/A	#N/A	#N/A	#N/A	#N/A	#N/A	#N/A	#N/A	#N/A	#N/A	#N/A	#N/A	#N/A	#N/A	#N/A	#N/A	#N/A
205	2-methylbutan-2-ol	CCC(C)(C)O	Alcohol-Tertiary	5.07757	-3.41167	#N/A	-0.684616	#N/A	2.39616	#N/A	#N/A	#N/A	#N/A	#N/A	#N/A	#N/A	#N/A	#N/A	#N/A	#N/A	#N/A	#N/A	#N/A	#N/A	#N/A	#N/A	#N/A	#N/A	#N/A	#N/A	#N/A	#N/A	#N/A	#N/A	#N/A	#N/A	#N/A	#N/A
206	2-methylpropan-2-ol	CC(C)(C)O	Alcohol-Tertiary	1.9968	-7.51367	#N/A	-3.9936	#N/A	0.0570514	#N/A	#N/A	-3.25193	#N/A	0.513462	#N/A	#N/A	#N/A	#N/A	0.969873	#N/A	#N/A	#N/A	#N/A	2.73847	#N/A	#N/A	#N/A	1.25513	#N/A	#N/A	#N/A	2.79552	2.28205	#N/A	#N/A	#N/A	-6.44681	#N/A
207	2-methylpentan-2-ol	CCCC(C)(C)O	Alcohol-Tertiary	9.52758	-0.0570514	#N/A	#N/A	#N/A	#N/A	#N/A	#N/A	#N/A	#N/A	#N/A	#N/A	#N/A	#N/A	#N/A	#N/A	#N/A	#N/A	#N/A	#N/A	#N/A	#N/A	#N/A	#N/A	#N/A	#N/A	#N/A	#N/A	#N/A	#N/A	#N/A	#N/A	#N/A	#N/A	#N/A
208	2-methylhexan-2-ol	CCCCC(C)(C)O	Alcohol-Tertiary	#N/A	3.57142	#N/A	#N/A	#N/A	#N/A	#N/A	#N/A	#N/A	#N/A	#N/A	#N/A	#N/A	#N/A	#N/A	#N/A	#N/A	#N/A	#N/A	#N/A	#N/A	#N/A	#N/A	#N/A	#N/A	#N/A	#N/A	#N/A	#N/A	#N/A	#N/A	#N/A	#N/A	#N/A	#N/A
209	2-methylheptan-2-ol	CCCCCC(C)(C)O	Alcohol-Tertiary	15.7462	#N/A	#N/A	#N/A	#N/A	#N/A	#N/A	#N/A	#N/A	#N/A	#N/A	#N/A	#N/A	#N/A	#N/A	#N/A	#N/A	#N/A	#N/A	#N/A	#N/A	#N/A	#N/A	#N/A	#N/A	#N/A	#N/A	#N/A	#N/A	#N/A	#N/A	#N/A	#N/A	#N/A	#N/A
210	cyclopentanol	OC1CCCC1	Alcohol-Secondary	4.05065	-4.50135	#N/A	#N/A	#N/A	#N/A	#N/A	#N/A	#N/A	#N/A	#N/A	#N/A	#N/A	#N/A	3.25193	#N/A	#N/A	#N/A	#N/A	#N/A	#N/A	#N/A	#N/A	#N/A	#N/A	#N/A	#N/A	#N/A	#N/A	#N/A	#N/A	#N/A	#N/A	#N/A	#N/A
211	cyclohexanol	OC1CCCCC1	Alcohol-Secondary	7.01732	-1.43769	#N/A	#N/A	#N/A	6.38975	#N/A	#N/A	#N/A	#N/A	#N/A	#N/A	#N/A	#N/A	6.16155	#N/A	#N/A	#N/A	#N/A	#N/A	#N/A	#N/A	#N/A	#N/A	6.67501	8.42649	#N/A	#N/A	#N/A	#N/A	#N/A	#N/A	#N/A	#N/A	#N/A
212	cycloheptanol	OC1CCCCCC1	Alcohol-Secondary	10.2692	2.20789	#N/A	#N/A	#N/A	#N/A	#N/A	#N/A	#N/A	#N/A	#N/A	#N/A	#N/A	#N/A	#N/A	#N/A	#N/A	#N/A	#N/A	#N/A	#N/A	#N/A	#N/A	#N/A	#N/A	#N/A	#N/A	#N/A	#N/A	#N/A	#N/A	#N/A	#N/A	#N/A	#N/A
213	cyclooctanol	OC1CCCCCCC1	Alcohol-Secondary	13.4641	7.09719	#N/A	#N/A	#N/A	#N/A	#N/A	#N/A	#N/A	#N/A	#N/A	#N/A	#N/A	#N/A	#N/A	#N/A	#N/A	#N/A	#N/A	#N/A	#N/A	#N/A	#N/A	#N/A	#N/A	#N/A	#N/A	#N/A	#N/A	#N/A	#N/A	#N/A	#N/A	#N/A	#N/A
214	adamantane	C1C2CC3CC1CC(C2)C3	Alkane-Cyclic	24.1898	27.4645	#N/A	#N/A	#N/A	#N/A	#N/A	#N/A	#N/A	#N/A	#N/A	#N/A	#N/A	#N/A	#N/A	#N/A	#N/A	#N/A	#N/A	#N/A	#N/A	#N/A	#N/A	#N/A	#N/A	#N/A	#N/A	#N/A	#N/A	#N/A	#N/A	#N/A	#N/A	#N/A	#N/A
215	cyclohexylmethylketone	CC(=O)C1CCCCC1	Ketone-Dialkyl	#N/A	7.64488	#N/A	#N/A	#N/A	#N/A	#N/A	#N/A	#N/A	#N/A	#N/A	#N/A	#N/A	#N/A	#N/A	#N/A	#N/A	#N/A	#N/A	#N/A	#N/A	#N/A	#N/A	#N/A	#N/A	#N/A	#N/A	#N/A	#N/A	#N/A	#N/A	#N/A	#N/A	#N/A	#N/A
216	2-methylcyclohexanone	CC1CCCCC1=O	Ketone-Cycloalkyl	7.47373	5.61956	#N/A	#N/A	#N/A	#N/A	#N/A	#N/A	#N/A	#N/A	#N/A	#N/A	#N/A	#N/A	#N/A	#N/A	#N/A	#N/A	#N/A	#N/A	#N/A	#N/A	#N/A	#N/A	#N/A	#N/A	#N/A	#N/A	#N/A	#N/A	#N/A	#N/A	#N/A	#N/A	#N/A
217	cyclopropane	C1CC1	Alkane-Cyclic	9.81284	10.6344	#N/A	#N/A	#N/A	#N/A	#N/A	#N/A	#N/A	#N/A	#N/A	#N/A	#N/A	#N/A	#N/A	#N/A	#N/A	#N/A	#N/A	9.69873	10.3263	#N/A	#N/A	#N/A	#N/A	#N/A	9.75578	#N/A	#N/A	#N/A	#N/A	11.4103	#N/A	#N/A	8.20399
218	propylcyclopentane	CCCC1CCCC1	Alkane-Cyclic Branched	25.1597	30.5967	#N/A	#N/A	#N/A	#N/A	#N/A	#N/A	#N/A	#N/A	#N/A	#N/A	#N/A	#N/A	#N/A	#N/A	#N/A	#N/A	#N/A	#N/A	#N/A	#N/A	#N/A	#N/A	#N/A	#N/A	#N/A	#N/A	#N/A	#N/A	#N/A	#N/A	#N/A	#N/A	#N/A
219	pentylcyclopentane	CCCCCC1CCCC1	Alkane-Cyclic Branched	31.2642	36.9122	#N/A	#N/A	#N/A	#N/A	#N/A	#N/A	#N/A	#N/A	#N/A	#N/A	#N/A	#N/A	#N/A	#N/A	#N/A	#N/A	#N/A	#N/A	#N/A	#N/A	#N/A	#N/A	#N/A	#N/A	#N/A	#N/A	#N/A	#N/A	#N/A	#N/A	#N/A	#N/A	#N/A
220	propylcyclohexane	CCCC1CCCCC1	Alkane-Cyclic Branched	#N/A	32.137	#N/A	#N/A	#N/A	#N/A	#N/A	#N/A	#N/A	#N/A	#N/A	#N/A	#N/A	#N/A	#N/A	#N/A	#N/A	#N/A	#N/A	#N/A	#N/A	#N/A	#N/A	#N/A	#N/A	#N/A	#N/A	#N/A	#N/A	#N/A	#N/A	#N/A	#N/A	#N/A	#N/A
221	butylcyclohexane	CCCCC1CCCCC1	Alkane-Cyclic Branched	#N/A	35.6343	#N/A	#N/A	#N/A	#N/A	#N/A	#N/A	#N/A	#N/A	#N/A	#N/A	#N/A	#N/A	#N/A	#N/A	#N/A	#N/A	#N/A	#N/A	#N/A	#N/A	#N/A	#N/A	#N/A	#N/A	#N/A	#N/A	#N/A	#N/A	#N/A	#N/A	#N/A	#N/A	#N/A
222	t-butylcyclohexane	CC(C)(C)C1CCCCC1	Alkane-Cyclic Branched	28.7539	33.5633	#N/A	#N/A	#N/A	#N/A	#N/A	#N/A	#N/A	#N/A	#N/A	#N/A	#N/A	#N/A	#N/A	#N/A	#N/A	#N/A	#N/A	#N/A	#N/A	#N/A	#N/A	#N/A	#N/A	#N/A	#N/A	#N/A	#N/A	#N/A	#N/A	#N/A	#N/A	#N/A	#N/A
223	2-methylpyridine	Cc1ccccn1	Pyridine-Methyl substituted	6.38975	0.125513	#N/A	#N/A	#N/A	9.81284	#N/A	#N/A	5.13462	#N/A	#N/A	#N/A	#N/A	#N/A	#N/A	#N/A	#N/A	#N/A	#N/A	#N/A	#N/A	#N/A	#N/A	#N/A	#N/A	#N/A	5.19168	5.70514	6.50386	5.30578	#N/A	#N/A	#N/A	1.71154	#N/A
224	3-methylpyridine	Cc1cccnc1	Pyridine-Methyl substituted	6.84617	0.747373	#N/A	#N/A	#N/A	10.7827	#N/A	#N/A	#N/A	#N/A	#N/A	#N/A	#N/A	#N/A	#N/A	#N/A	#N/A	#N/A	#N/A	6.56091	6.84616	#N/A	#N/A	#N/A	#N/A	#N/A	#N/A	#N/A	#N/A	4.39296	#N/A	#N/A	#N/A	1.54039	#N/A
225	4-methylpyridine	Cc1ccncc1	Pyridine-Methyl substituted	6.96027	0.114103	#N/A	4.79232	#N/A	#N/A	#N/A	#N/A	#N/A	#N/A	#N/A	#N/A	#N/A	#N/A	#N/A	#N/A	#N/A	#N/A	#N/A	#N/A	#N/A	#N/A	#N/A	#N/A	#N/A	#N/A	#N/A	#N/A	#N/A	#N/A	#N/A	#N/A	#N/A	#N/A	#N/A
226	2,3-dimethylpyridine	Cc1cccnc1C	Pyridine-Methyl substituted	9.47053	2.88109	#N/A	#N/A	#N/A	#N/A	#N/A	#N/A	#N/A	#N/A	#N/A	#N/A	#N/A	#N/A	#N/A	#N/A	#N/A	#N/A	#N/A	#N/A	#N/A	#N/A	#N/A	#N/A	#N/A	#N/A	#N/A	#N/A	#N/A	#N/A	#N/A	#N/A	#N/A	#N/A	#N/A
227	2,4-dimethylpyridine	Cc1ccnc(C)c1	Pyridine-Methyl substituted	9.47053	2.48744	#N/A	#N/A	#N/A	#N/A	#N/A	#N/A	#N/A	#N/A	#N/A	#N/A	#N/A	#N/A	#N/A	#N/A	#N/A	#N/A	#N/A	#N/A	#N/A	#N/A	#N/A	#N/A	#N/A	#N/A	#N/A	#N/A	#N/A	#N/A	#N/A	#N/A	#N/A	#N/A	#N/A
228	2,5-dimethylpyridine	Cc1ccc(C)nc1	Pyridine-Methyl substituted	9.47053	3.0009	#N/A	#N/A	#N/A	#N/A	#N/A	#N/A	#N/A	#N/A	#N/A	#N/A	#N/A	#N/A	#N/A	#N/A	#N/A	#N/A	#N/A	#N/A	#N/A	#N/A	#N/A	#N/A	#N/A	#N/A	#N/A	#N/A	#N/A	#N/A	#N/A	#N/A	#N/A	#N/A	#N/A
229	2,6-dimethylpyridine	Cc1cccc(C)n1	Pyridine-Methyl substituted	9.58463	2.225	#N/A	#N/A	#N/A	13.1789	#N/A	#N/A	7.53078	#N/A	#N/A	#N/A	#N/A	#N/A	#N/A	#N/A	#N/A	#N/A	#N/A	#N/A	#N/A	#N/A	#N/A	#N/A	#N/A	#N/A	#N/A	#N/A	#N/A	#N/A	#N/A	#N/A	#N/A	3.82244	#N/A
230	3,4-dimethylpyridine	Cc1cnccc1C	Pyridine-Methyl substituted	9.47053	2.7784	#N/A	#N/A	#N/A	#N/A	#N/A	#N/A	#N/A	#N/A	#N/A	#N/A	#N/A	#N/A	#N/A	#N/A	#N/A	#N/A	#N/A	#N/A	#N/A	#N/A	#N/A	#N/A	#N/A	#N/A	#N/A	#N/A	#N/A	#N/A	#N/A	#N/A	#N/A	#N/A	#N/A
231	3,5-dimethylpyridine	Cc1cncc(C)c1	Pyridine-Methyl substituted	10.1551	3.78821	#N/A	#N/A	#N/A	#N/A	#N/A	#N/A	#N/A	#N/A	#N/A	#N/A	#N/A	#N/A	#N/A	#N/A	#N/A	#N/A	#N/A	#N/A	#N/A	#N/A	#N/A	#N/A	#N/A	#N/A	#N/A	#N/A	#N/A	#N/A	#N/A	#N/A	#N/A	#N/A	#N/A
232	quinoline	c1ccc2ncccc2c1	Pyridine-Quinoline	11.5814	7.17136	#N/A	#N/A	#N/A	15.8603	#N/A	#N/A	#N/A	#N/A	#N/A	#N/A	#N/A	#N/A	#N/A	#N/A	#N/A	#N/A	#N/A	#N/A	#N/A	#N/A	#N/A	#N/A	#N/A	#N/A	#N/A	#N/A	#N/A	#N/A	#N/A	#N/A	#N/A	#N/A	#N/A
233	isoquinoline	c1ccc2cnccc2c1	Pyridine-Isoquinoline	11.8667	9.55611	#N/A	#N/A	#N/A	17.0013	#N/A	#N/A	#N/A	#N/A	#N/A	#N/A	#N/A	#N/A	#N/A	#N/A	#N/A	#N/A	#N/A	#N/A	#N/A	#N/A	#N/A	#N/A	#N/A	#N/A	#N/A	#N/A	#N/A	#N/A	#N/A	#N/A	#N/A	#N/A	#N/A
234	propylbenzene	CCCc1ccccc1	Benzene-Alkyl Substituted	21.1375	21.9077	#N/A	#N/A	#N/A	#N/A	#N/A	#N/A	#N/A	#N/A	#N/A	25.559	#N/A	#N/A	#N/A	#N/A	#N/A	20.0821	#N/A	#N/A	#N/A	#N/A	#N/A	#N/A	21.109	#N/A	20.1962	#N/A	#N/A	#N/A	#N/A	21.0007	#N/A	#N/A	#N/A
235	butylbenzene	CCCCc1ccccc1	Benzene-Alkyl Substituted	24.3039	25.3308	#N/A	#N/A	#N/A	#N/A	#N/A	#N/A	#N/A	#N/A	#N/A	29.0391	#N/A	#N/A	#N/A	#N/A	#N/A	22.7635	22.3071	#N/A	#N/A	#N/A	#N/A	#N/A	#N/A	#N/A	23.1629	#N/A	#N/A	#N/A	#N/A	#N/A	#N/A	#N/A	#N/A
236	pentylbenzene	CCCCCc1ccccc1	Benzene-Alkyl Substituted	27.9552	28.868	#N/A	#N/A	#N/A	#N/A	#N/A	#N/A	#N/A	#N/A	#N/A	#N/A	#N/A	#N/A	#N/A	#N/A	#N/A	#N/A	#N/A	#N/A	#N/A	#N/A	#N/A	#N/A	#N/A	#N/A	#N/A	#N/A	#N/A	#N/A	#N/A	#N/A	#N/A	#N/A	#N/A
237	hexylbenzene	CCCCCCc1ccccc1	Benzene-Alkyl Substituted	31.4924	32.4622	#N/A	#N/A	#N/A	#N/A	#N/A	#N/A	#N/A	#N/A	#N/A	#N/A	#N/A	#N/A	#N/A	#N/A	#N/A	29.6667	#N/A	#N/A	#N/A	#N/A	#N/A	#N/A	#N/A	#N/A	#N/A	#N/A	#N/A	#N/A	#N/A	#N/A	#N/A	#N/A	#N/A
238	isopropylbenzene	CC(C)c1ccccc1	Benzene-Alkyl Substituted	20.8808	22.0447	#N/A	#N/A	#N/A	#N/A	#N/A	#N/A	#N/A	#N/A	#N/A	25.9584	#N/A	#N/A	23.3911	#N/A	#N/A	20.4244	#N/A	#N/A	#N/A	#N/A	#N/A	#N/A	21.4513	#N/A	20.3673	#N/A	#N/A	#N/A	#N/A	#N/A	#N/A	#N/A	#N/A
239	tert-butylbenzene	CC(C)(C)c1ccccc1	Benzene-Alkyl Substituted	23.4481	23.3511	#N/A	#N/A	#N/A	#N/A	#N/A	#N/A	#N/A	#N/A	#N/A	27.2135	#N/A	#N/A	#N/A	#N/A	#N/A	21.2802	#N/A	#N/A	#N/A	#N/A	#N/A	#N/A	#N/A	#N/A	21.5654	#N/A	#N/A	#N/A	#N/A	#N/A	#N/A	#N/A	#N/A
240	1,3-dichlorobenzene	[Cl]c1cccc([Cl])c1	Benzene-Dichloro	20.5385	21.052	#N/A	21.8507	#N/A	22.0789	#N/A	#N/A	#N/A	#N/A	#N/A	#N/A	#N/A	#N/A	#N/A	#N/A	#N/A	#N/A	#N/A	#N/A	#N/A	#N/A	#N/A	#N/A	19.4545	#N/A	#N/A	#N/A	#N/A	#N/A	#N/A	21.7367	#N/A	#N/A	#N/A
241	1,4-dichlorobenzene	[Cl]c1ccc([Cl])cc1	Benzene-Dichloro	19.3404	21.0805	#N/A	22.0218	#N/A	22.193	#N/A	#N/A	#N/A	#N/A	#N/A	#N/A	#N/A	#N/A	#N/A	#N/A	#N/A	#N/A	#N/A	#N/A	#N/A	#N/A	#N/A	#N/A	21.2231	#N/A	#N/A	#N/A	#N/A	#N/A	#N/A	21.1091	#N/A	20.044	#N/A
242	fluoranthene	c1ccc2c(c1)c3cccc4cccc2c34	Polycyclic aromatic	29.4385	30.7336	32.2169	33.261	#N/A	34.9154	30.8591	30.2943	34.3449	#N/A	#N/A	#N/A	34.6872	#N/A	#N/A	#N/A	#N/A	27.0652	27.9152	27.824	28.3032	28.8166	29.2559	30.1517	29.4956	#N/A	26.9168	27.4417	26.5859	#N/A	27.4417	28.4061	33.8885	28.925	#N/A
243	coronene	c1cc2ccc3ccc4ccc5ccc6ccc1c7c2c3c4c5c67	Polycyclic aromatic	#N/A	37.3686	#N/A	#N/A	#N/A	#N/A	#N/A	#N/A	#N/A	#N/A	#N/A	#N/A	#N/A	#N/A	#N/A	#N/A	#N/A	#N/A	#N/A	#N/A	#N/A	#N/A	#N/A	#N/A	#N/A	#N/A	#N/A	#N/A	#N/A	#N/A	#N/A	#N/A	#N/A	#N/A	#N/A
244	acenaphthene	C1Cc2cccc3cccc1c23	Polycyclic aromatic	22.3641	23.7277	26.0154	27.0994	#N/A	27.9552	25.2167	23.7904	#N/A	25.6731	26.3007	28.0693	27.727	#N/A	#N/A	#N/A	#N/A	21.1661	21.9305	22.4782	22.7977	23.1172	23.2998	23.4082	22.8205	23.6193	21.8507	22.193	21.9648	21.9077	22.0789	23.8762	#N/A	24.2012	#N/A
245	fluorene	C1c2ccccc2c2ccccc12	Benzene-Biphenyl	23.8475	25.5134	#N/A	#N/A	#N/A	#N/A	#N/A	26.643	#N/A	#N/A	#N/A	#N/A	#N/A	#N/A	#N/A	#N/A	#N/A	23.0316	23.3739	24.0186	24.2982	24.6519	24.766	25.057	24.9885	25.0513	23.334	23.4481	24.5321	22.9917	23.4481	24.886	#N/A	#N/A	#N/A
246	indane	C1Cc2ccccc2C1	Benzene-indane	18.5702	20.0821	#N/A	#N/A	#N/A	#N/A	#N/A	#N/A	#N/A	#N/A	#N/A	#N/A	#N/A	#N/A	#N/A	#N/A	#N/A	#N/A	#N/A	#N/A	#N/A	#N/A	#N/A	#N/A	#N/A	#N/A	#N/A	#N/A	#N/A	#N/A	#N/A	#N/A	#N/A	#N/A	#N/A
247	fluoroethane	CCF	Alkane-Monofluoro	#N/A	5.9961	#N/A	#N/A	#N/A	#N/A	#N/A	#N/A	#N/A	#N/A	#N/A	9.18527	#N/A	#N/A	#N/A	#N/A	#N/A	#N/A	#N/A	#N/A	#N/A	#N/A	#N/A	#N/A	#N/A	#N/A	#N/A	#N/A	#N/A	#N/A	#N/A	#N/A	#N/A	#N/A	#N/A
248	1-fluoropropane	CCCF	Alkane-Monofluoro	#N/A	8.50636	#N/A	#N/A	#N/A	#N/A	#N/A	#N/A	#N/A	#N/A	#N/A	#N/A	#N/A	#N/A	#N/A	#N/A	#N/A	#N/A	#N/A	#N/A	#N/A	#N/A	#N/A	#N/A	#N/A	#N/A	#N/A	#N/A	#N/A	#N/A	#N/A	#N/A	#N/A	#N/A	#N/A
249	2-fluoropropane	CC(C)F	Alkane-Monofluoro	#N/A	8.63758	#N/A	#N/A	#N/A	#N/A	#N/A	#N/A	#N/A	#N/A	#N/A	#N/A	#N/A	#N/A	#N/A	#N/A	#N/A	#N/A	#N/A	#N/A	#N/A	#N/A	#N/A	#N/A	#N/A	#N/A	#N/A	#N/A	#N/A	#N/A	#N/A	#N/A	#N/A	#N/A	#N/A
250	1-fluorobutane	CCCCF	Alkane-Monofluoro	13.0648	11.7697	#N/A	#N/A	#N/A	#N/A	#N/A	#N/A	#N/A	#N/A	#N/A	#N/A	#N/A	#N/A	#N/A	#N/A	#N/A	#N/A	#N/A	#N/A	#N/A	#N/A	#N/A	#N/A	#N/A	#N/A	#N/A	#N/A	#N/A	#N/A	#N/A	#N/A	#N/A	#N/A	#N/A
251	1-fluoropentane	CCCCCF	Alkane-Monofluoro	13.293	15.1186	#N/A	#N/A	#N/A	#N/A	#N/A	#N/A	#N/A	#N/A	#N/A	#N/A	#N/A	#N/A	#N/A	#N/A	#N/A	#N/A	#N/A	#N/A	#N/A	#N/A	#N/A	#N/A	#N/A	#N/A	#N/A	#N/A	#N/A	#N/A	#N/A	#N/A	#N/A	#N/A	#N/A
252	fluorobenzene	Fc1ccccc1	Benzene-Monofluoro	12.9507	12.5399	#N/A	11.8667	#N/A	16.2596	#N/A	#N/A	#N/A	#N/A	#N/A	17.2866	#N/A	#N/A	#N/A	#N/A	#N/A	#N/A	#N/A	#N/A	#N/A	#N/A	#N/A	#N/A	#N/A	#N/A	#N/A	#N/A	#N/A	#N/A	#N/A	13.9891	#N/A	12.6939	#N/A
253	1,2-difluorobenzene	Fc1ccccc1F	Benzene-Difluoro	13.5212	13.5383	#N/A	#N/A	#N/A	#N/A	#N/A	#N/A	#N/A	#N/A	#N/A	#N/A	#N/A	#N/A	#N/A	#N/A	#N/A	#N/A	#N/A	#N/A	#N/A	#N/A	#N/A	#N/A	#N/A	#N/A	#N/A	#N/A	#N/A	#N/A	#N/A	#N/A	#N/A	#N/A	#N/A
254	1,3-difluorobenzene	Fc1cccc(F)c1	Benzene-Difluoro	13.293	#N/A	#N/A	#N/A	#N/A	#N/A	#N/A	#N/A	#N/A	#N/A	#N/A	#N/A	#N/A	#N/A	#N/A	#N/A	#N/A	#N/A	#N/A	#N/A	#N/A	#N/A	#N/A	#N/A	#N/A	#N/A	#N/A	#N/A	#N/A	#N/A	#N/A	#N/A	#N/A	#N/A	#N/A
255	1,4-difluorobenzene	Fc1ccc(F)cc1	Benzene-Difluoro	12.1519	#N/A	#N/A	#N/A	#N/A	#N/A	#N/A	#N/A	#N/A	#N/A	#N/A	#N/A	#N/A	#N/A	#N/A	#N/A	#N/A	#N/A	#N/A	#N/A	#N/A	#N/A	#N/A	#N/A	#N/A	#N/A	#N/A	#N/A	#N/A	#N/A	#N/A	#N/A	#N/A	#N/A	#N/A
256	o-fluorochlorobenzene	Fc1ccccc1[Cl]	Benzene-ChloroFluoro	#N/A	16.6761	#N/A	#N/A	#N/A	#N/A	#N/A	#N/A	#N/A	#N/A	#N/A	#N/A	#N/A	#N/A	#N/A	#N/A	#N/A	#N/A	#N/A	#N/A	#N/A	#N/A	#N/A	#N/A	#N/A	#N/A	#N/A	#N/A	#N/A	#N/A	#N/A	#N/A	#N/A	#N/A	#N/A
257	m-fluorochlorobenzene	Fc1cccc([Cl])c1	Benzene-ChloroFluoro	#N/A	16.4536	#N/A	#N/A	#N/A	#N/A	#N/A	#N/A	#N/A	#N/A	#N/A	#N/A	#N/A	#N/A	#N/A	#N/A	#N/A	#N/A	#N/A	#N/A	#N/A	#N/A	#N/A	#N/A	#N/A	#N/A	#N/A	#N/A	#N/A	#N/A	#N/A	#N/A	#N/A	#N/A	#N/A
258	p-fluorochlorobenzene	Fc1ccc([Cl])cc1	Benzene-ChloroFluoro	#N/A	16.6875	#N/A	#N/A	#N/A	#N/A	#N/A	#N/A	#N/A	#N/A	#N/A	#N/A	#N/A	#N/A	#N/A	#N/A	#N/A	#N/A	#N/A	#N/A	#N/A	#N/A	#N/A	#N/A	#N/A	#N/A	#N/A	#N/A	#N/A	#N/A	#N/A	#N/A	#N/A	#N/A	#N/A
259	3-fluorophenol	Oc1cccc(F)c1	Phenol-Fluoro substituted	11.0109	-4.21039	#N/A	#N/A	#N/A	#N/A	#N/A	#N/A	#N/A	#N/A	#N/A	#N/A	#N/A	#N/A	#N/A	#N/A	#N/A	#N/A	#N/A	#N/A	#N/A	#N/A	#N/A	#N/A	#N/A	#N/A	#N/A	#N/A	#N/A	#N/A	#N/A	#N/A	#N/A	#N/A	#N/A
260	4-fluorophenol	Oc1ccc(F)cc1	Phenol-Fluoro substituted	10.0981	-3.97078	#N/A	-1.48334	#N/A	#N/A	#N/A	#N/A	#N/A	#N/A	#N/A	#N/A	4.05065	#N/A	#N/A	#N/A	#N/A	#N/A	#N/A	#N/A	#N/A	#N/A	#N/A	#N/A	#N/A	#N/A	#N/A	#N/A	#N/A	#N/A	#N/A	#N/A	#N/A	#N/A	#N/A
261	fluoromethane	CF	Alkane-Monofluoro	2.90962	#N/A	#N/A	#N/A	#N/A	#N/A	#N/A	#N/A	#N/A	#N/A	#N/A	#N/A	#N/A	#N/A	#N/A	#N/A	#N/A	#N/A	#N/A	#N/A	#N/A	#N/A	#N/A	#N/A	#N/A	#N/A	#N/A	#N/A	#N/A	#N/A	#N/A	#N/A	#N/A	#N/A	#N/A
262	cis-but-2-ene	CC=CC	Alkene-methyl substituted	13.293	15.5579	#N/A	#N/A	#N/A	#N/A	#N/A	#N/A	#N/A	#N/A	#N/A	#N/A	#N/A	#N/A	#N/A	#N/A	#N/A	#N/A	#N/A	#N/A	#N/A	#N/A	#N/A	#N/A	#N/A	#N/A	#N/A	#N/A	#N/A	#N/A	#N/A	#N/A	#N/A	#N/A	#N/A
263	trans-but-2-ene	CC=CC	Alkene-methyl substituted	13.1789	15.0844	#N/A	#N/A	#N/A	#N/A	#N/A	#N/A	#N/A	#N/A	#N/A	#N/A	#N/A	#N/A	15.9173	#N/A	#N/A	#N/A	#N/A	#N/A	#N/A	#N/A	#N/A	#N/A	#N/A	#N/A	#N/A	#N/A	#N/A	#N/A	#N/A	#N/A	#N/A	#N/A	#N/A
264	2-methylbut-2-ene	CC=C(C)C	Alkene-methyl substituted	15.2327	18.1937	#N/A	19.0552	#N/A	#N/A	#N/A	#N/A	#N/A	#N/A	#N/A	#N/A	#N/A	#N/A	#N/A	#N/A	18.3934	#N/A	#N/A	#N/A	#N/A	#N/A	#N/A	#N/A	#N/A	#N/A	#N/A	#N/A	#N/A	18.9411	#N/A	#N/A	#N/A	#N/A	#N/A
265	2,3-dimethylbut-2-ene	CC(C)=C(C)C	Alkene-methyl substituted	#N/A	#N/A	#N/A	#N/A	#N/A	#N/A	#N/A	#N/A	#N/A	#N/A	#N/A	#N/A	#N/A	#N/A	#N/A	#N/A	#N/A	#N/A	#N/A	#N/A	#N/A	#N/A	#N/A	#N/A	#N/A	#N/A	#N/A	#N/A	#N/A	#N/A	#N/A	#N/A	#N/A	#N/A	#N/A
266	2,2-dimethylpropane	CC(C)(C)C	Alkane Acyclic Branched	#N/A	20.8808	#N/A	#N/A	#N/A	#N/A	#N/A	#N/A	#N/A	#N/A	#N/A	#N/A	#N/A	#N/A	#N/A	#N/A	#N/A	18.4846	#N/A	#N/A	#N/A	#N/A	#N/A	#N/A	#N/A	#N/A	#N/A	#N/A	#N/A	#N/A	#N/A	22.0789	#N/A	#N/A	#N/A
